# Supplementary material for: Nickel/ligand loading-controlled divergent and selective coupling between redox-active methylenecyclopropanes and ArBr
Source: Royal Society of Chemistry journal article supplement (doi:10.1039/d4qo01346h), 2024-01-01
Supplement: d4qo01346h1.pdf [file d4qo01346h1.pdf]

# Supporting Information

## Nickel/ligand Loading-controlled Divergent and Selective Coupling between Redox-Active Methylenecyclopropanes and ArBr

Ben Mao,<sup>a</sup> Xiao-Yu Zhang,<sup>a</sup> Xiu-Fen Bi,<sup>c</sup> Xiao-Yin Yang,<sup>\*c</sup> Min Shi<sup>\*a,b</sup> and Yin Wei<sup>\*b</sup>

<sup>a</sup> Key Laboratory for Advanced Materials and Institute of Fine Chemicals, School of Chemistry & Molecular Engineering, East China University of Science and Technology, 130 Meilong Road, Shanghai 200237, China.

<sup>b</sup> State Key Laboratory of Organometallic Chemistry, Center for Excellence in Molecular Synthesis, Shanghai Institute of Organic Chemistry, University of Chinese Academy of Sciences, Chinese Academy of Sciences, 345 Lingling Road, Shanghai 200032 China.

<sup>c</sup> Huafon Chemical Co. Ltd., 1688 Kaifaqu Road, Ruian Economic Development Zone, Zhejiang 325200, China.

E-mail: [yang.xiaoyin@huafeng.com](mailto:yang.xiaoyin@huafeng.com); [mshi@mail.sioc.ac.cn](mailto:mshi@mail.sioc.ac.cn); [weiyin@sioc.ac.cn](mailto:weiyin@sioc.ac.cn)

### CONTENTS

|                                                                       |      |
|-----------------------------------------------------------------------|------|
| 1. General Remarks .....                                              | S2   |
| 2. Optimization of Reaction Conditions .....                          | S3   |
| 3. Preparation of Substrates .....                                    | S9   |
| 4. General Procedure for the Synthesis of Products .....              | S12  |
| 5. Mechanistic Studies .....                                          | S14  |
| 6. Analysis of internal mixtures and some unsuccessful examples ..... | S32  |
| 7. Proposed Reaction Mechanisms .....                                 | S34  |
| 8. Synthetic Applications .....                                       | S36  |
| 9. Characterization Data of New Substrates .....                      | S42  |
| 10. Characterization Data of Products .....                           | S45  |
| 11. NMR Spectra .....                                                 | S66  |
| 12. Reference .....                                                   | S169 |

## 1. General Remarks

Melting points were determined on a digital melting point apparatus and temperatures were uncorrected. NMR spectra were recorded with a Bruker spectrometer at 400 MHz ( $^1\text{H}$  NMR), 600 MHz ( $^1\text{H}$  NMR), 101 MHz ( $^{13}\text{C}$  NMR), 151 MHz ( $^{13}\text{C}$  NMR) and 565 MHz ( $^{19}\text{F}$  NMR) in  $\text{CDCl}_3$ , respectively. Chemical shifts were reported in ppm and are referenced to the residual solvent resonance as the internal standard ( $\text{CHCl}_3$ :  $\delta = 7.26$  ppm for  $^1\text{H}$  NMR and  $\text{CDCl}_3$ :  $\delta = 77.00$  ppm for  $^{13}\text{C}$  NMR). Infrared spectra were recorded on a Perkin-Elmer PE-983 spectrometer with absorption in  $\text{cm}^{-1}$ . Mass spectra were recorded by ESI, EI, DART and HRMS was measured on a HP-5989 instrument. Commercially available reagents were used without further purification. Organic solvents used were dried by standard methods when necessary. All reactions were monitored by TLC with Huanghai GF<sub>254</sub> silica gel coated plates. Flash column chromatography was performed by using 300-400 mesh silica gel eluting with ethyl and petroleum at increased pressure. All reactions were performed under argon using standard Schlenk techniques.

The photoreaction setup is reassembled as following picture with a blue-LED, a fan and a magnetic stirrer. The reaction tube was about 5 cm far from the light source. The 30 W Blue LED (Wavelength: 455 – 460 nm) was directly purchased online from Taobao.com.

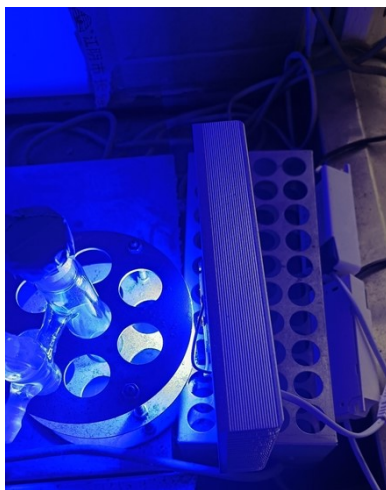

**Figure S1.** The photoreaction setup

## 2. Optimization of Reaction Conditions

In a flame dried Schlenk tube (10 mL) equipped with a magnetic stir bar, substrate **1a**, 1-bromo-4-(trifluoromethyl)benzene, photocatalyst, electron donor, ligand, nickel source, base and degassed solvent were added. The tube was degassed by alternating vacuum evacuation (5 min) and argon backfill for three times. The mixture was stirred for 10 min before being placed 5 cm away from the blue LED (30 W) and stirred for 18 h with a fan to maintain temperature. Upon completion, 1,3,5-trimethoxybenzene (1.0 equiv) used as an internal standard was added after removal of the tube from the light source. EtOAc (15 mL) was added into the tube and the mixture was washed with water for 3 times ( $3 \times 5$  mL), the organic layer was dried over  $\text{Na}_2\text{SO}_4$ , filtered, and concentrated to dryness. The crude was analyzed by  $^1\text{H}$  NMR.

### 2.1 Table S1. Solvent Optimization

| Entry | Solvent                | <b>3a</b> , Yield (%) <sup>[a]</sup> |
|-------|------------------------|--------------------------------------|
| 1     | NMP                    | 20                                   |
| 2     | DMF                    | 13                                   |
| 3     | $\text{CH}_3\text{CN}$ | 15                                   |
| 4     | DMAc                   | 18                                   |
| 5     | 1,4-Dioxane            | —                                    |
| 6     | MTBE                   | —                                    |

<sup>[a]</sup>Yields were determined by  $^1\text{H}$  NMR using 1,3,5-trimethoxybenzene as an internal standard.

## 2.2 Table S2. Base Optimization

| Entry | Base                             | 3aa, Yield (%) <sup>[a]</sup> |
|-------|----------------------------------|-------------------------------|
| 1     | K <sub>2</sub> CO <sub>3</sub>   | 20                            |
| 2     | Li <sub>2</sub> CO <sub>3</sub>  | 39                            |
| 3     | Na <sub>2</sub> CO <sub>3</sub>  | 18                            |
| 4     | K <sub>2</sub> HPO <sub>4</sub>  | 17                            |
| 5     | <sup>t</sup> Pr <sub>2</sub> NEt | 35                            |
| 6     | Et <sub>3</sub> N                | 34                            |
| 7     | w/o                              | 21                            |

<sup>[a]</sup>Yields were determined by <sup>1</sup>H NMR using 1,3,5-trimethoxybenzene as an internal standard.

## 2.3 Table S3. Photocatalyst Optimization

| Entry | Photocatalyst                                                    | 3aa, Yield (%) <sup>[a]</sup> |
|-------|------------------------------------------------------------------|-------------------------------|
| 1     | 4CzIPN                                                           | 39                            |
| 2     | Ir[dF(Me)ppy] <sub>2</sub> (dtbbpy)PF <sub>6</sub>               | 33                            |
| 3     | Ir(dtbbpy)(ppy) <sub>2</sub> PF <sub>6</sub>                     | 34                            |
| 4     | Ir[dF(CF <sub>3</sub> )ppy] <sub>2</sub> (dtbbpy)PF <sub>6</sub> | 45                            |

<sup>[a]</sup>Yields were determined by <sup>1</sup>H NMR using 1,3,5-trimethoxybenzene as an internal standard.

## 2.4 Table S4. Nickel source Optimization

| Entry | Nickel source              | 3aa, Yield (%) <sup>[a]</sup> |
|-------|----------------------------|-------------------------------|
| 1     | NiBr <sub>2</sub> ·DME     | 45                            |
| 2     | NiBr <sub>2</sub> ·diglyme | 33                            |
| 3     | NiCl <sub>2</sub> ·DME     | 42                            |
| 4     | Ni(TMHD) <sub>2</sub>      | —                             |

<sup>[a]</sup>Yields were determined by <sup>1</sup>H NMR using 1,3,5-trimethoxybenzene as an internal standard.

## 2.5 Table S5. HEH loading, Base loading, and Concentration Optimization

| Entry | HEH (equiv) | Li <sub>2</sub> CO <sub>3</sub> (equiv) | Conc. (M) | 3aa, Yield (%) <sup>[a]</sup> |
|-------|-------------|-----------------------------------------|-----------|-------------------------------|
| 1     | 1.0         | 1.0                                     | 0.2       | 45                            |
| 2     | 1.5         | 1.0                                     | 0.2       | 50                            |
| 3     | 2.0         | 1.0                                     | 0.2       | 53                            |
| 4     | 2.0         | 3.0                                     | 0.33      | 15                            |
| 5     | 2.0         | 3.0                                     | 0.1       | 57                            |
| 6     | 2.0         | 4.0                                     | 0.05      | 83                            |

<sup>[a]</sup>Yields were determined by <sup>1</sup>H NMR using 1,3,5-trimethoxybenzene as an internal standard.

## 2.6 Table S6. Ligand Optimization

| Entry | Ligand | 3aa, Yield (%) <sup>[a]</sup> |
|-------|--------|-------------------------------|
| 1     | L1     | 83                            |
| 2     | L2     | 50                            |
| 3     | L3     | —                             |
| 4     | L4     | —                             |
| 5     | L5     | 57                            |
| 6     | L6     | —                             |
| 7     | L7     | 43                            |
| 8     | L8     | —                             |

<sup>[a]</sup>Yields were determined by <sup>1</sup>H NMR using 1,3,5-trimethoxybenzene as an internal standard.

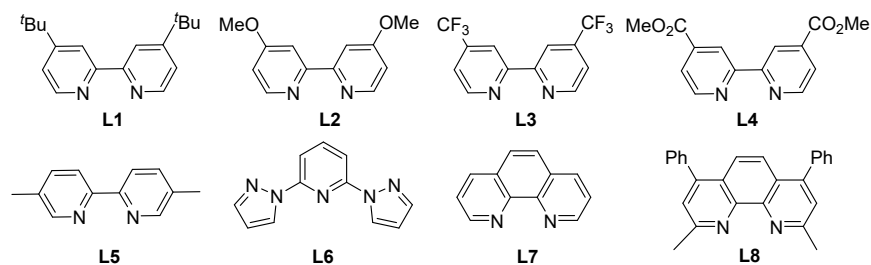

## 2.7 Table S7. Control experiments

| Entry | Deviation           | 3aa, Yield (%) <sup>[a]</sup> |
|-------|---------------------|-------------------------------|
| 1     | none                | 83 (75) <sup>[b]</sup>        |
| 2     | w/o irradiation     | —                             |
| 3     | w/o Nickel catalyst | —                             |
| 4     | w/o HEH             | —                             |
| 5     | w/o Photocatalyst   | —                             |
| 6     | w/o ligand          | —                             |

<sup>[a]</sup>Yields were determined by <sup>1</sup>H NMR using 1,3,5-trimethoxybenzene as an internal standard; <sup>[b]</sup>Isolated yield on 0.2 mmol scale.

## 2.8 Table S8. Slight optimization of the EDA complex strategy according to the previous report<sup>1</sup>

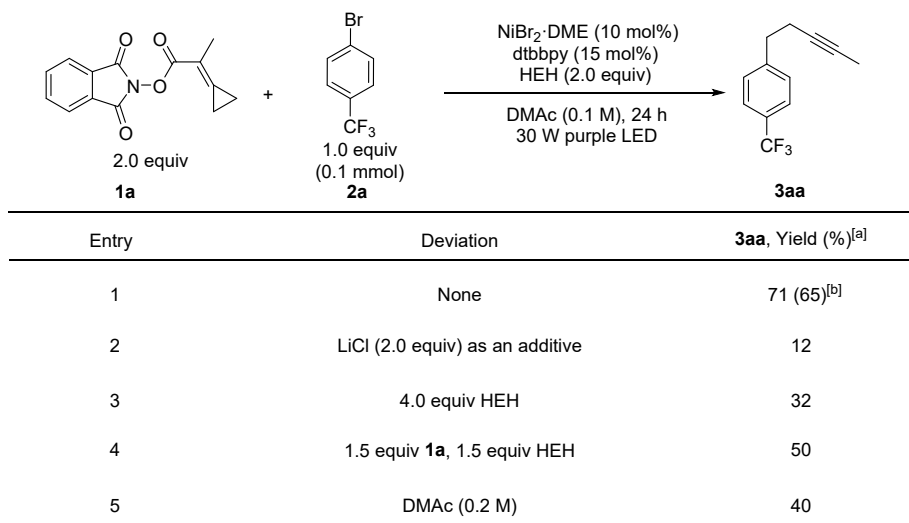

<sup>[a]</sup>Yields were determined by <sup>1</sup>H NMR using 1,3,5-trimethoxybenzene as an internal standard; <sup>[b]</sup>isolated yield on 0.2 mmol scale.

## 2.9 Table S9. Nickel catalyst and ligand loading Optimization

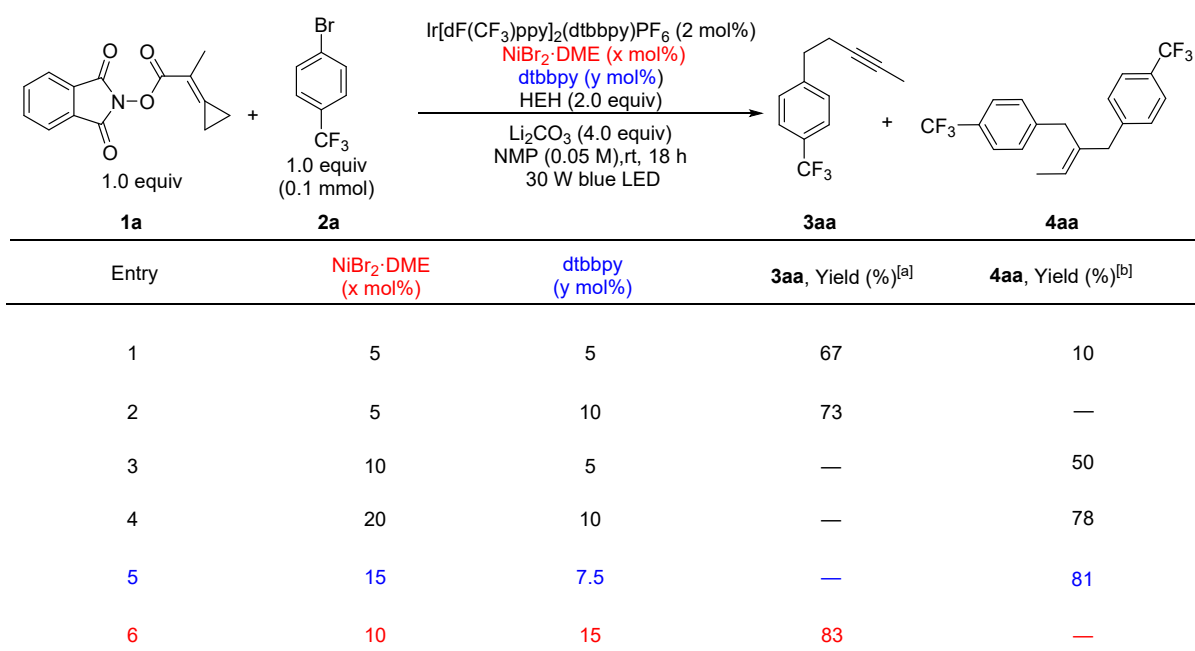

<sup>[a]</sup>Yields were determined by <sup>1</sup>H NMR using 1,3,5-trimethoxybenzene as an internal standard; <sup>[b]</sup>Yields were determined by <sup>1</sup>H NMR using 1,3,5-trimethoxybenzene as an internal standard and were calculated on 0.05 mmol scale;

## 2.10 Table S10. Further Optimization of Product 4aa

$\text{Ir}[\text{dF}(\text{CF}_3)\text{ppy}]_2(\text{dtbbpy})\text{PF}_6$  (2 mol%)  
 $\text{NiBr}_2 \cdot \text{DME}$  (15 mol%)  
 $\text{dtbbpy}$  (7.5 mol%)  
 $\text{HEH}$  (2.0 equiv)  
 $\text{Li}_2\text{CO}_3$  (4.0 equiv)  
 $\text{NMP}$  (0.05 M), rt, 18 h  
 30 W blue LED

| Entry | Deviation                                                                                | 4aa, Yield (%) <sup>[a]</sup> |
|-------|------------------------------------------------------------------------------------------|-------------------------------|
| 1     | None                                                                                     | 81 (72) <sup>[b]</sup>        |
| 2     | 4CzIPN as photocatalyst                                                                  | 51                            |
| 3     | $\text{Ir}(\text{dtbbpy})(\text{ppy})_2\text{PF}_6$ as photocatalyst                     | 69                            |
| 4     | $\text{Ir}[\text{dF}(\text{Me})\text{ppy}]_2(\text{dtbbpy})\text{PF}_6$ as photocatalyst | 58                            |
| 5     | $\text{NiBr}_2 \cdot \text{DME}$ (10 mol%), $\text{dtbbpy}$ (5 mol%)                     | 50                            |
| 6     | $\text{NiBr}_2 \cdot \text{DME}$ (20 mol%), $\text{dtbbpy}$ (10 mol%)                    | 78                            |
| 7     | $\text{NiBr}_2 \cdot \text{dtbbpy}$ (10 mol%)                                            | 24                            |
| 8     | $\text{NiCl}_2 \cdot \text{DME}$ instead of $\text{NiBr}_2 \cdot \text{DME}$             | 68                            |
| 9     | $\text{Ni}(\text{acac})_2$ instead of $\text{NiBr}_2 \cdot \text{DME}$                   | —                             |
| 10    | <b>L3, L4 or L6</b> instead of <b>L1</b>                                                 | —                             |
| 11    | <b>L2</b> instead of <b>L1</b>                                                           | 75                            |
| 12    | <b>L5</b> instead of <b>L1</b>                                                           | 58                            |
| 13    | <b>L7</b> instead of <b>L1</b>                                                           | 35                            |
| 14    | 1.0 equiv HEH                                                                            | 56                            |
| 15    | DMAc instead of NMP                                                                      | 32                            |
| 16    | NMP (0.1 M)                                                                              | 33                            |
| 17    | w/o HEH, irradiation, nickel source, ligand or photocatalyst                             | —                             |

<sup>[a]</sup>Yields were determined by <sup>1</sup>H NMR using 1,3,5-trimethoxybenzene as an internal standard and were calculated on 0.05 mmol scale; <sup>[b]</sup>Isolated yield on 0.3 mmol scale.

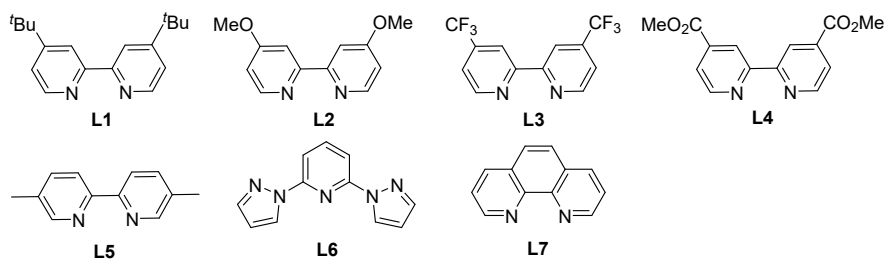



### 3. Preparation of Substrates

The *N*-Hydroxyphthalimide Esters (NHPI esters, Substrates **1**) were synthesized according to the previous report of our group and the procedures were slightly modified. Compounds **1a** – **1d**, **1g** – **1h**, **1j**, **1l**, **1o**, and **1q** are known products reported in our group's previous report.<sup>2</sup> The substrates of ArBr **2** were all commercially available.

#### Substrates of NHPI esters

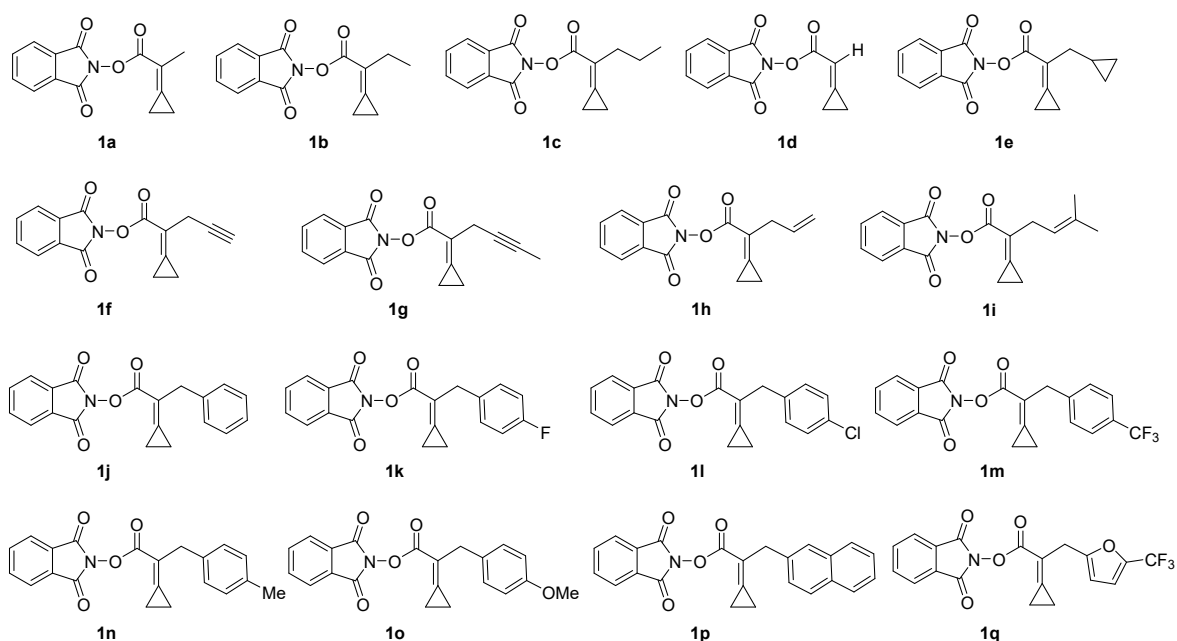

#### Substrates of ArBr

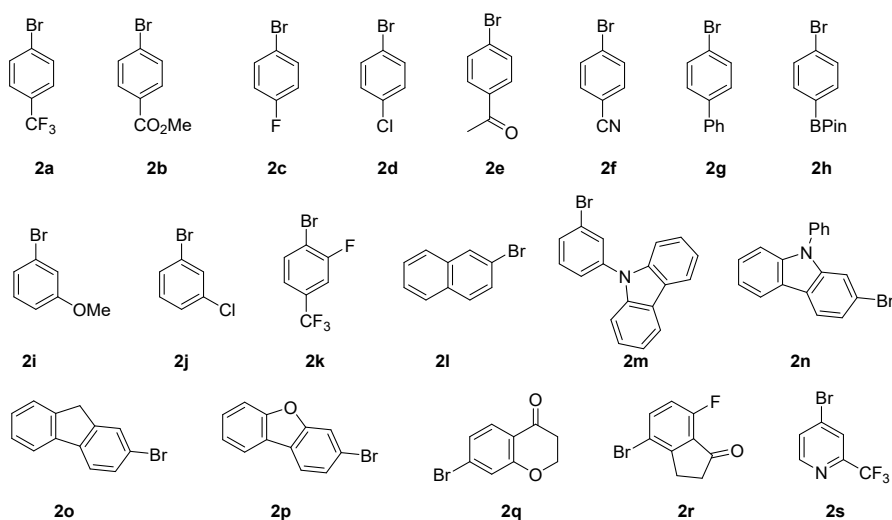

## General Procedure for the Synthesis of Substrates 1

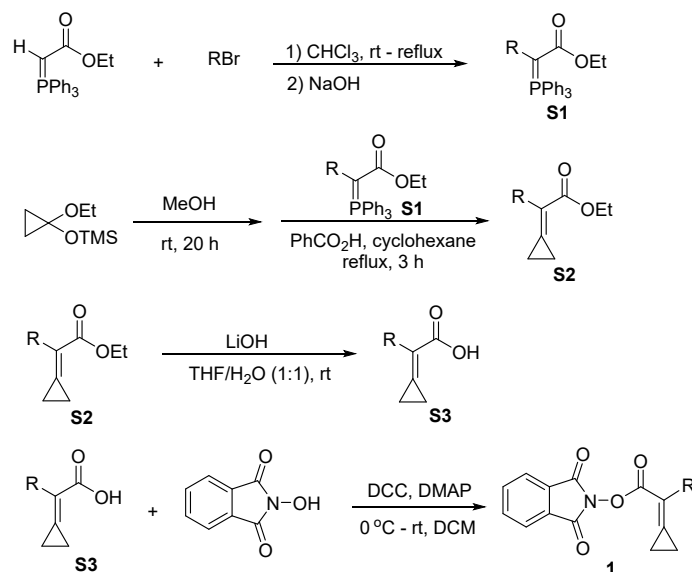

**Step 1:** A solution of ethyl 2-(triphenyl- $\lambda^5$ -phosphaneylidene)acetate (20 mmol, 1.0 equiv) and the corresponding RBr (20 mmol, 1.0 equiv) in  $\text{CHCl}_3$  (60.0 mL) was stirred at room temperature for 30 min. Afterwards the mixture was refluxed for 12 h in an oil bath. The solvent was removed under reduced pressure and the residue was dissolved in water (75 mL) and  $\text{CH}_2\text{Cl}_2$  (75 mL). Then 2 M NaOH was added and the mixture was allowed to stirred vigorously for 20 min. The organic layer was collected and the aqueous layer was extracted with  $\text{CH}_2\text{Cl}_2$  (50 mL  $\times$  3). The combined organic layer was dried over anhydrous sodium sulfate. The solvent was removed under reduced pressure. The residue could be directly used in the next step without further purification.<sup>3</sup>

**Step 2:** A round bottom flask equipped with a magnetic stir bar was added (1-ethoxycyclopropoxy)trimethylsilane (1.74 g, 10 mmol, 1.0 equiv) and methanol (5.0 mL). The solution was stirred at room temperature for 20 h. Then the methanol was removed in vacuo and the residue was dissolved in cyclohexane (50 mL). Benzoic acid (122 mg, 1.0 mmol, 0.1 mmol) was also added and the mixture was heated to reflux in an oil bath. The corresponding ylide **S1** (12 mmol, 1.2 equiv) was slowly added in 30 min. The mixture was allowed to reflux for another 2.5 h. After cooling down to room temperature, the solution was collected and the residue was washed with petroleum ether. The solution and the washings were combined and concentrated under reduced pressure. The residue was purified by a silica gel flash chromatography (petroleum ether/ethyl acetate = 20/1) to afford the compound **S2** as a colorless oil in moderate yields (ranging

from 50% to 70%).

**Step 3:** A solution of compound **S2** in THF (20 mL) and water (20 mL) was stirred at 0 °C in an ice bath for 10 min, Lithium hydroxide (5.0 equiv) was slowly added to the solution. The resulting mixture was stirred at room temperature and monitored by TLC analysis. Upon completion, the mixture was acidified by adding HCl (1.0 M). The aqueous solution was extracted with ether and the combined organics was dried over anhydrous sodium sulfate. The solvent was removed under reduced pressure and the residue was purified by a silica gel flash chromatography (petroleum ether/ethyl acetate = 2/1) to give the compound **S3** as a colorless oil.

**Step 4:** A solution of compound **S3** (3.0 mmol, 1.0 equiv), *N*-hydroxyphthalimide (3.6 mmol, 1.2 equiv) and 4-dimethylaminopyridine (37 mg, 0.3 mmol) in DCM (20 mL) was stirred at 0 °C in an ice bath for 10 min. Afterwards, the solution of dicyclohexylcarbodiimide (742 mg, 3.6 mmol, 1.2 equiv) in DCM (10.0 mL) was added dropwise for 25 min. The reaction system was warmed to room temperature and stirred for 12 h. Upon completion, the mixture was filtered through a celite. The filtrate was concentrated under reduced pressure and the residue was purified by a silica gel flash chromatography (petroleum ether/ethyl acetate = 6/1) to afford the compound **1** in moderate to good yields.

## 4. General Procedure for the Synthesis of Products

### General Procedure B for the Synthesis of Products 3

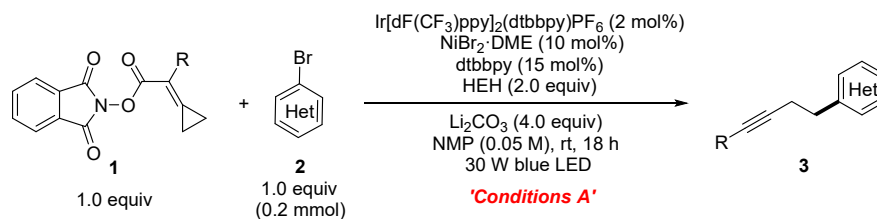

In a flame dried Schlenk tube (10 mL) equipped with a magnetic stir bar, substrate **1** (0.2 mmol), ArBr **2** (0.2 mmol, 1.0 equiv), Ir[dF(CF<sub>3</sub>)ppy]<sub>2</sub>(dtbbpy)PF<sub>6</sub> (4.5 mg, 2 mol%), HEH (101.3 mg, 2.0 equiv), dtbbpy (8.1 mg, 15 mol%), Li<sub>2</sub>CO<sub>3</sub> (59.1 mg, 4.0 equiv), NiBr<sub>2</sub>·DME (6.2 mg, 10 mol%) and degassed NMP (4.0 mL, 0.05 M) were added. The tube was degassed by alternating vacuum evacuation (10 min) and argon backfill for three times. The mixture was stirred for 10 min before being placed 5 cm away from the blue LED (30 W) and stirred for 18 h with a fan to maintain temperature. Upon completion, EtOAc (30 mL) was added into the tube and the mixture was washed with water for 3 times (3 × 10 mL), the organic layer was dried over Na<sub>2</sub>SO<sub>4</sub>, filtered, and concentrated to dryness. The crude was purified by a column chromatography on silica gel to afford the purified product **3**.

### General Procedure C for the Synthesis of Products 4

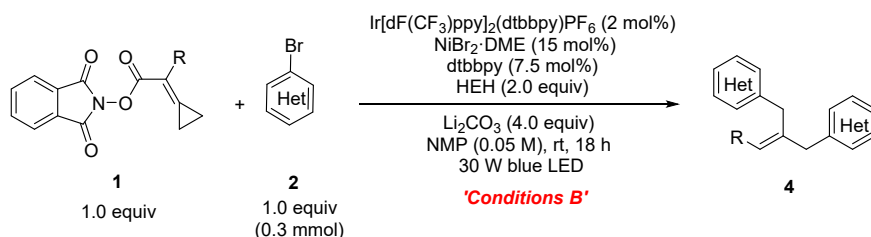

In a flame dried Schlenk tube (10 mL) equipped with a magnetic stir bar, substrate **1** (0.3 mmol), ArBr **2** (0.3 mmol, 1.0 equiv), Ir[dF(CF<sub>3</sub>)ppy]<sub>2</sub>(dtbbpy)PF<sub>6</sub> (6.7 mg, 2 mol%), HEH (152.0 mg, 2.0 equiv), dtbbpy (6.0 mg, 7.5 mol%), Li<sub>2</sub>CO<sub>3</sub> (88.7 mg, 4.0 equiv), NiBr<sub>2</sub>·DME (13.9 mg, 15 mol%) and degassed NMP (6.0 mL, 0.05 M) were added. The tube was degassed by alternating vacuum evacuation (10 min) and argon backfill for three times. The mixture was stirred for 10 min before being placed 5 cm away from the blue LED (30 W) and stirred for 18 h with a fan to maintain

temperature. Upon completion, EtOAc (40 mL) was added into the tube and the mixture was washed with water for 3 times ( $3 \times 10$  mL), the organic layer was dried over  $\text{Na}_2\text{SO}_4$ , filtered, and concentrated to dryness. The crude was purified by a column chromatography on silica gel to afford the purified product **4**.

## 5. Mechanistic Studies

### 5.1 Transformations of substrate **1n** under the photocatalytic conditions

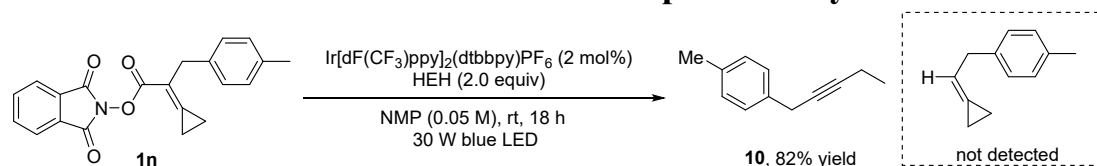

In a flame dried Schlenk tube (10 mL) equipped with a magnetic stir bar, substrate **1n** (69.4 mg, 0.2 mmol), Ir[dF(CF<sub>3</sub>)ppy]<sub>2</sub>(dtbbpy)PF<sub>6</sub> (4.5 mg, 2 mol%), HEH (101.3 mg, 2.0 equiv) and degassed NMP (4.0 mL, 0.05 M) were added. The tube was degassed by alternating vacuum evacuation (10 min) and argon backfill for three times. The mixture was placed 5 cm away from the blue LED (30 W) and stirred for 18 h with a fan to maintain temperature. Upon completion, EtOAc (30 mL) was added into the tube and the mixture was washed with water for 3 times (3 × 10 mL), the organic layer was dried over Na<sub>2</sub>SO<sub>4</sub>, filtered, and concentrated to dryness. The crude was purified by PTLC to afford the rearrangement product **10** (25.9 mg, 82% yield) as a colorless oil in 82% yield, while the 1-(2-cyclopropylideneethyl)-4-methylbenzene product was not detected in this reaction.

<sup>1</sup>H NMR (400 MHz, CDCl<sub>3</sub>) δ 7.23 (d, *J* = 7.9 Hz, 2H), 7.12 (d, *J* = 7.8 Hz, 2H), 3.53 (t, *J* = 2.6 Hz, 2H), 2.32 (s, 3H), 2.22 (qt, *J* = 7.5, 2.4 Hz, 2H), 1.15 (t, *J* = 7.5 Hz, 3H); <sup>13</sup>C NMR (151 MHz, CDCl<sub>3</sub>) δ 135.9, 134.5, 129.1, 127.7, 83.7, 77.2, 24.7, 21.0, 14.2, 12.5; IR (neat): ν 2956, 2924, 2855, 1733, 1514, 1494, 1459, 1362, 1186, 1080, 967, 806 cm<sup>-1</sup>; HRMS (DART) *m/z*: [M+H]<sup>+</sup> Calcd. for C<sub>12</sub>H<sub>15</sub> 159.1168; found 159.1168.

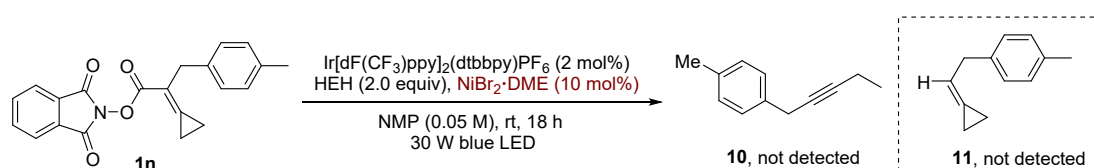

Based on the above reaction conditions, when we added extra NiBr<sub>2</sub>·DME (10 mol%), neither product **10** nor the cyclopropane-maintained product **11** was detected. Other complexes from the reaction were isolated. These resulting ring-opening products from the MCP fragment were mixed together owing to their similar polarity and molecular weight, and we failed to figure out their structures. These results indicate that the free nickel species could destroy the MCP moiety.

### 5.2 Radical Trapping Experiments

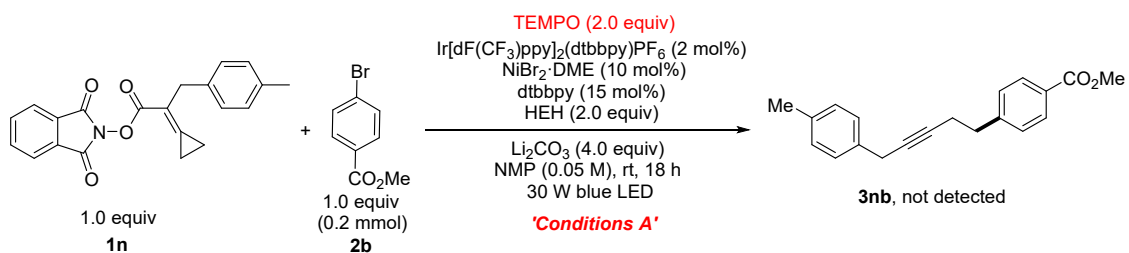

In a flame dried Schlenk tube (10 mL) equipped with a magnetic stir bar, substrate **1n** (69.4 mg, 0.2 mmol), **2b** (42.8 mg, 0.2 mmol, 1.0 equiv), Ir[dF(CF<sub>3</sub>)ppy]<sub>2</sub>(dtbbpy)PF<sub>6</sub> (4.5 mg, 2 mol%), HEH (101.3 mg, 2.0 equiv), dtbbpy (8.1 mg, 15 mol%), Li<sub>2</sub>CO<sub>3</sub> (59.1 mg, 4.0 equiv), NiBr<sub>2</sub>·DME (6.2 mg, 10 mol%), TEMPO (62.5 mg, 2.0 equiv) and degassed NMP (4.0 mL, 0.05 M) were added. The tube was degassed by alternating vacuum evacuation (10 min) and argon backfill for three times. The mixture was stirred for 10 min before being placed 5 cm away from the blue LED (30 W) and stirred for 18 h with a fan to maintain temperature. Upon completion, EtOAc (30 mL) was added into the tube and the mixture was washed with water for 3 times (3 × 10 mL), the organic layer was dried over Na<sub>2</sub>SO<sub>4</sub>, filtered, and concentrated to dryness. The crude was analyzed by <sup>1</sup>H NMR, where the desired product **3nb** was not observed.

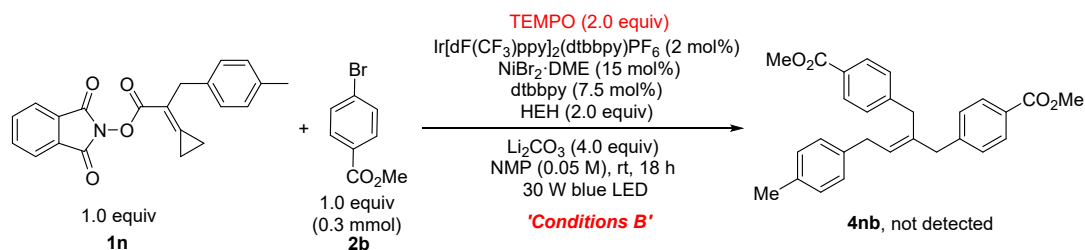

In a flame dried Schlenk tube (10 mL) equipped with a magnetic stir bar, substrate **1n** (104.1 mg, 0.3 mmol), **2b** (64.2 mg, 0.3 mmol, 1.0 equiv), Ir[dF(CF<sub>3</sub>)ppy]<sub>2</sub>(dtbbpy)PF<sub>6</sub> (6.7 mg, 2 mol%), HEH (152.0 mg, 2.0 equiv), dtbbpy (6.0 mg, 7.5 mol%), Li<sub>2</sub>CO<sub>3</sub> (88.7 mg, 4.0 equiv), NiBr<sub>2</sub>·DME (13.9 mg, 15 mol%), TEMPO (93.8 mg, 2.0 equiv) and degassed NMP (6.0 mL, 0.05 M) were added. The tube was degassed by alternating vacuum evacuation (10 min) and argon backfill for three times. The mixture was stirred for 10 min before being placed 5 cm away from the blue LED (30 W) and stirred for 18 h with a fan to maintain temperature. Upon completion, EtOAc (40 mL) was added into the tube and the mixture was washed with water for 3 times (3 × 10 mL), the organic layer was dried over Na<sub>2</sub>SO<sub>4</sub>, filtered, and concentrated to dryness. The crude was analyzed by <sup>1</sup>H NMR, where the desired product **4nb** was not observed.

The above results indicated that a radical process was involved in the generation of product **3** and product **4**.

### 5.3 UV/vis absorption Studies

All the UV-Vis absorption spectra were recorded on the SHIMADZU UV-2600 UV-visible spectrophotometer. As shown in Figure S2, substrate **1a** in DMAc (0.01 M) have an absorption tail that extends to 400 nm. Figure S3 shows the UV-Vis absorption spectra of DMAc solutions of HEH (0.1 M), **1a** (0.1 M), and a mixture of HEH (0.1 M) with **1a** (0.1 M). Consistent with the previous reports, a bathochromic shift (Figure S3, red band) is observed for a mixture of NHPI ester **1a** and Hantzsch-ester, which indicates the formation of an electron donor-acceptor (EDA) complex. Hence, EDA-complex could probably provide another pathway for radical production.

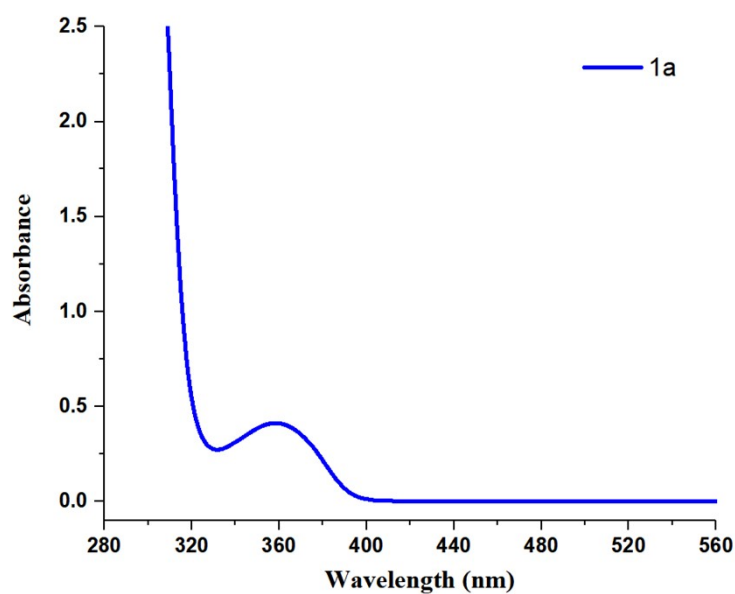

**Figure S2.** UV-Vis absorption spectra of **1a**



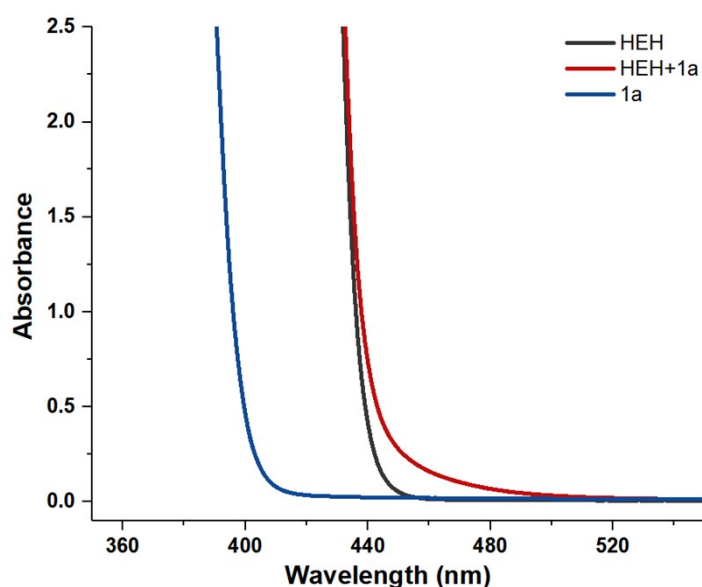

**Figure S3.** UV-Vis absorption spectra of HEH, **1a**, and their mixture

### 5.4 Emission Quenching Studies

All the emission intensities were recorded by Hitachi F-4600 FL spectrometer. Solutions of Ir[dF(CF<sub>3</sub>)ppy]<sub>2</sub>(dtbbpy) PF<sub>6</sub> ( $2 \times 10^{-5}$  M) in dry NMP were excited at 380 nm and the emission intensity was collected at the maximum wavelength 480 – 481 nm. Solutions of different concentration of HEH, NiBr<sub>2</sub>·diglyme and substrate **1a** were prepared respectively and introduced to a 1 cm path length quartz cuvette equipped with a Teflon® septum.

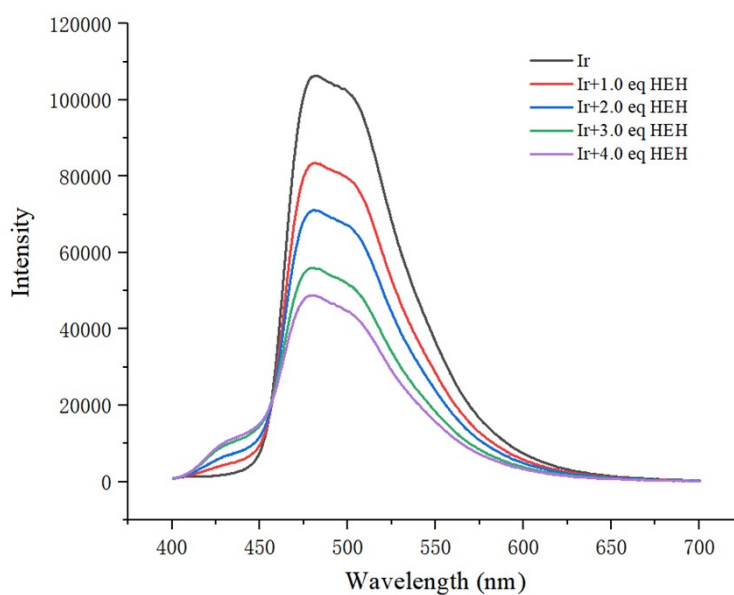

**Figure S4.** Stern-Volmer Quenching of Photocatalyst with HEH

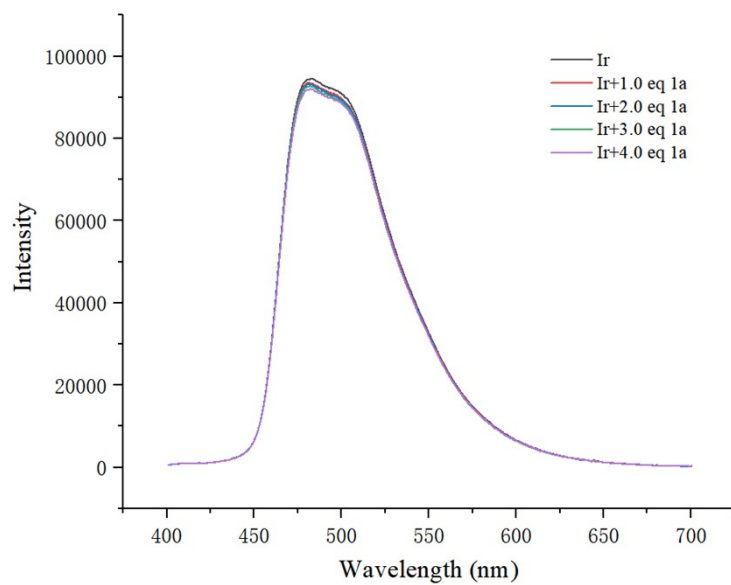

**Figure S5.** Stern-Volmer Quenching of Photocatalyst with Substrate **1a**

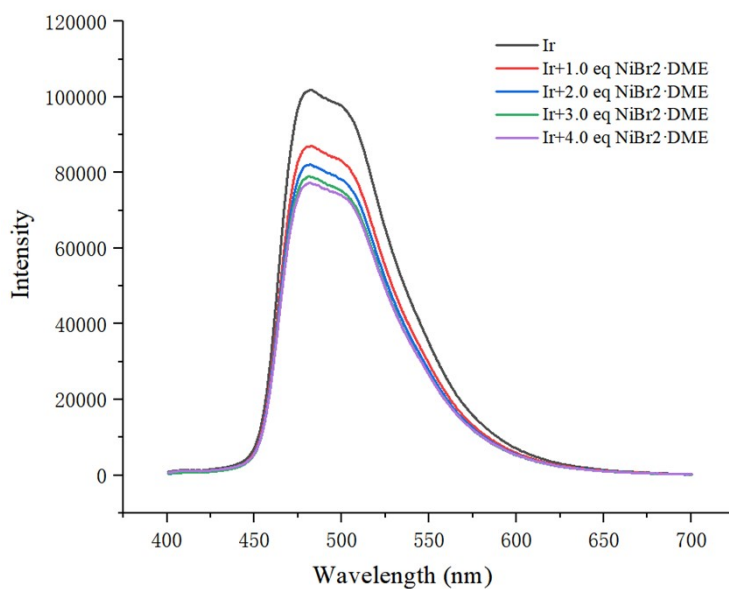

**Figure S6.** Stern-Volmer Quenching of Photocatalyst with NiBr<sub>2</sub>·DME

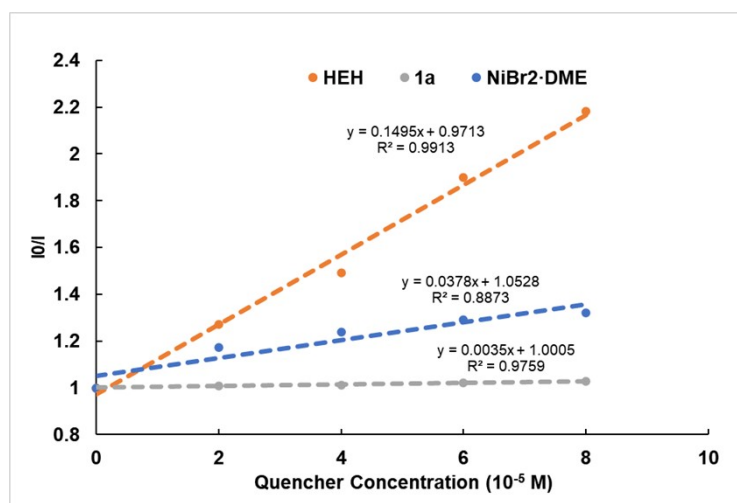

Figure S7. Stern-Volmer Quenching of Photocatalyst with HEH, **1a**, and NiBr<sub>2</sub>·diglyme

## 5.5 Quantum Yield Determination<sup>4</sup>

To further investigate the mechanism of the reactions, we employed the two model reactions of **1a** to **3aa** and **4aa** to measure their quantum yields, respectively. The photo flux was determined by ILT1400 Portable Radiometer/Photometer.  $\Delta E$  was calculated by deduction of the recorded data directly read from the apparatus.  $\Delta E$  and  $n_x$  both were measured three times and their average values were taken respectively.

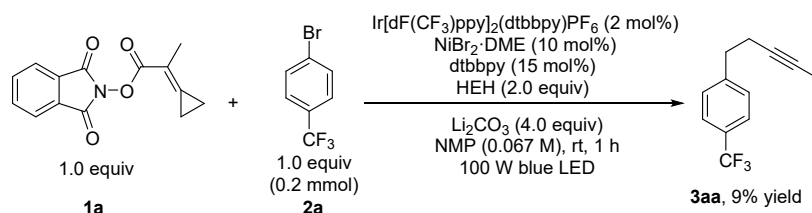

A cuvette equipped with a magnetic stir bar was added substrate **1a** (51.4 mg, 0.2 mmol), **2a** (28  $\mu$ L, 0.2 mmol, 1.0 equiv), Ir[dF(CF<sub>3</sub>)ppy]<sub>2</sub>(dtbbpy)PF<sub>6</sub> (4.5 mg, 2 mol%), HEH (101.3 mg, 2.0 equiv), dtbbpy (8.1 mg, 15 mol%), Li<sub>2</sub>CO<sub>3</sub> (59.1 mg, 4.0 equiv), NiBr<sub>2</sub>·DME (6.2 mg, 10 mol%) and degassed NMP (3.0 mL, 0.067 M) were added. The tube was degassed by alternating vacuum evacuation (10 min) and argon backfill for three times. Then the tube was placed 5 cm away from the blue LED (100 W) and stirred for 1 h at room temperature. Upon completion, 1,3,5-trimethoxybenzene (16.8 mg, 0.5 equiv) used as an internal standard was added after removal of the tube from the light source. EtOAc (20 mL) was added into the tube and the mixture was washed with water for 3 times (3  $\times$  8 mL), the organic layer was dried over Na<sub>2</sub>SO<sub>4</sub>, filtered, and concentrated to dryness. The crude was analyzed by <sup>1</sup>H NMR. The quantum yield is calculated to be

0.15.

$$\phi = \frac{n_x}{n_p} = \frac{n_x}{\frac{\Delta E \times S \times t}{N_A h \nu}} = \frac{n_x \times N_A \times h \times c}{\Delta E \times S \times t \times \lambda}$$

$$\frac{0.09 \times 0.2 \times 10^{-3} \text{ mol} \times 6.022 \times 10^{23} \times 6.626 \times 10^{-34} \text{ J} \cdot \text{s} \times 2.998 \times 10^8 \text{ m} \cdot \text{s}^{-1}}{(3 \times 10^{-3} \text{ W} \cdot \text{cm}^{-2} \times 3 \text{ cm}^2) \times 3600 \text{ s} \times 455 \times 10^{-9} \text{ m}} = 0.15$$

$n_x$  is the amount of photochemical or photophysical events  $x$  occurred during irradiation,  $n_p$  is the number of photons absorbed by the reactant.  $E$  is the radiant power.  $S$  is the irradiated area:  $3 \text{ cm}^2$ ;  $t$  is the irradiated time:  $3600 \text{ s}$ ;  $N_A$  is the Avogadro constant:  $6.022 \times 10^{23} / \text{mol}$ ;  $h$  is the Planck constant:  $6.626 \times 10^{-34} \text{ J} \cdot \text{s}$ ;  $\nu$  is the frequency of incident light;  $c$  is velocity of light  $2.998 \times 10^8 \text{ m/s}$ .  $\lambda$  is the wavelength:  $455 \text{ nm}$ ;  $n_x$  was analyzed by  $^1\text{H}$  NMR,  $\Delta E$  was measured by ILT1400 Portable Radiometer/Photometer.

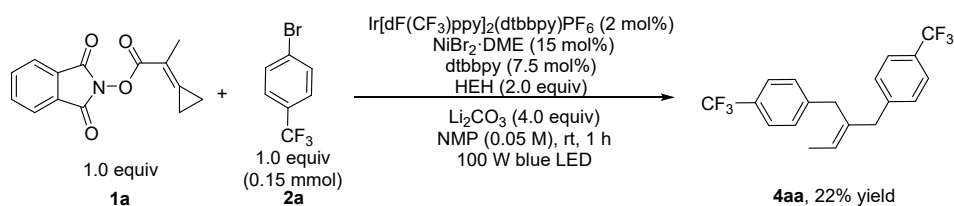

A cuvette equipped with a magnetic stir bar was added substrate **1a** (38.6 mg, 0.15 mmol), **2a** (21  $\mu\text{L}$ , 0.15 mmol, 1.0 equiv), Ir[dF(CF<sub>3</sub>)ppy]<sub>2</sub>(dtbbpy)PF<sub>6</sub> (3.4 mg, 2 mol%), HEH (76.0 mg, 2.0 equiv), dtbbpy (3.0 mg, 7.5 mol%), Li<sub>2</sub>CO<sub>3</sub> (44.4 mg, 4.0 equiv), NiBr<sub>2</sub>·DME (7.0 mg, 10 mol%) and degassed NMP (0.05 M, 3.0 mL) were added. The tube was degassed by alternating vacuum evacuation (10 min) and argon backfill for three times. Then the tube was placed 5 cm away from the blue LED (100 W) and stirred for 1 h at room temperature. Upon completion, 1,3,5-trimethoxybenzene (25.2 mg, 1.0 equiv) used as an internal standard was added after removal of the tube from the light source. EtOAc (20 mL) was added into the tube and the mixture was washed with water for 3 times ( $3 \times 8 \text{ mL}$ ), the organic layer was dried over Na<sub>2</sub>SO<sub>4</sub>, filtered, and concentrated to dryness. The crude was analyzed by  $^1\text{H}$  NMR. The quantum yield is calculated to be 0.04.

$$\phi = \frac{n_x}{n_p} = \frac{n_x}{\frac{\Delta E \times S \times t}{N_A h \nu}} = \frac{n_x \times N_A \times h \times c}{\Delta E \times S \times t \times \lambda}$$

$$\frac{0.11 \times 0.15 \times 10^{-3} \text{ mol} \times 6.022 \times 10^{23} \times 6.626 \times 10^{-34} \text{ J} \cdot \text{s} \times 2.998 \times 10^8 \text{ m} \cdot \text{s}^{-1}}{(10.0 \times 10^{-3} \text{ W} \cdot \text{cm}^{-2} \times 3 \text{ cm}^2) \times 3600 \text{ s} \times 455 \times 10^{-9} \text{ m}} = 0.04$$

$n_x$  is the amount of photochemical or photophysical events  $x$  occurred during irradiation,  $n_p$  is the number of photons absorbed by the reactant.  $E$  is the radiant power.  $S$  is the irradiated area: 3 cm<sup>2</sup>;  $t$  is the irradiated time: 3600 s;  $N_A$  is the Avogadro constant: 6.022×10<sup>23</sup>/mol;  $h$  is the Planck constant: 6.626×10<sup>-34</sup> J·s;  $\nu$  is the frequency of incident light;  $c$  is velocity of light 2.998×10<sup>8</sup> m/s).  $\lambda$  is the wavelength: 455 nm;  $n_x$  was analyzed by <sup>1</sup>H NMR,  $\Delta E$  was measured by ILT1400 Portable Radiometer/Photometer.

## 5.6 Cyclic Voltammetry Experiment

Cyclic Voltammetry was performed on a CH Instruments Electrochemical Workstation model Chi660e. The substrate **1a** in DMAc (0.001 M) was tested with  $\text{Bu}_4\text{NPF}_6$  (0.1 M) as the supporting electrolyte, using a glassy carbon as the working electrode, a Pt as the counter electrode, and a saturated calomel electrode reference electrode. Ar was bubbled into the system for 20 min to degas the solution. Scan rate = 0.1 V/s, 2 sweep segments, a sample interval of 0.001 V.

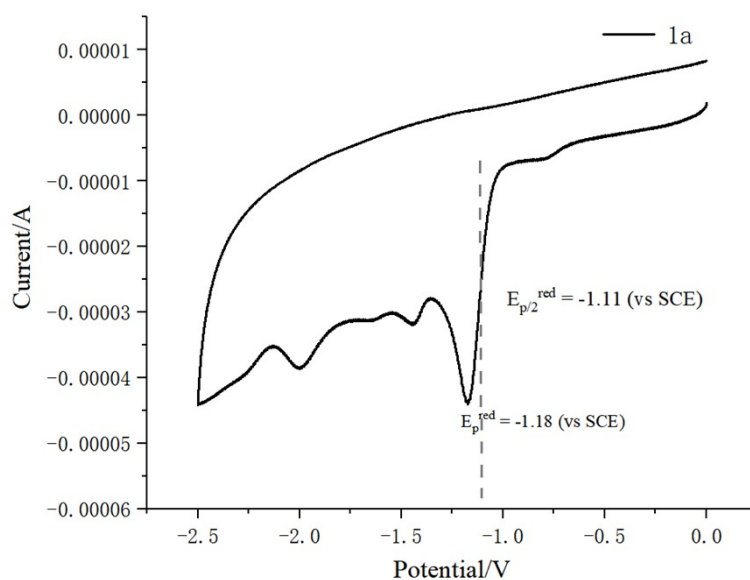

**Figure S8.** Cyclic Voltammogram of **1a**

## 5.7 Using classical MCP substrate instead under conditions B

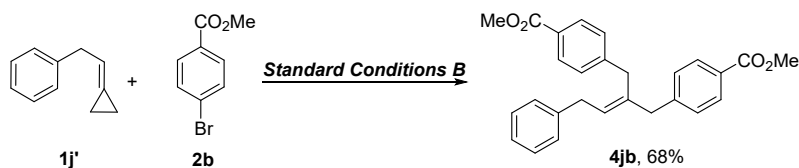

In a flame dried Schlenk tube (10 mL) equipped with a magnetic stir bar, substrate **1j'**<sup>5</sup> (43.3 mg, 0.3 mmol), **2b** (64.2 mg, 0.3 mmol, 1.0 equiv), Ir[dF(CF<sub>3</sub>)ppy]<sub>2</sub>(dtbbpy)PF<sub>6</sub> (6.7 mg, 2 mol%), HEH (152.0 mg, 2.0 equiv), dtbbpy (6.0 mg, 7.5 mol%), Li<sub>2</sub>CO<sub>3</sub> (88.7 mg, 4.0 equiv), NiBr<sub>2</sub>·DME (13.9 mg, 15 mol%), and degassed NMP (6.0 mL, 0.05 M) were added. The tube was degassed by alternating vacuum evacuation (10 min) and argon backfill for three times. The mixture was stirred for 10 min before being placed 5 cm away from the blue LED (30 W) and stirred for 18 h with a fan to maintain temperature. Upon completion, EtOAc (40 mL) was added into the tube and the mixture was washed with water for 3 times (3 × 10 mL), the organic layer was dried over Na<sub>2</sub>SO<sub>4</sub>, filtered, and concentrated to dryness. The product **4jb** was isolated in 68% yield (43.7 mg).

## 5.8 Deuterium studies

### Synthesis of Deuterated Hantzsch Esters

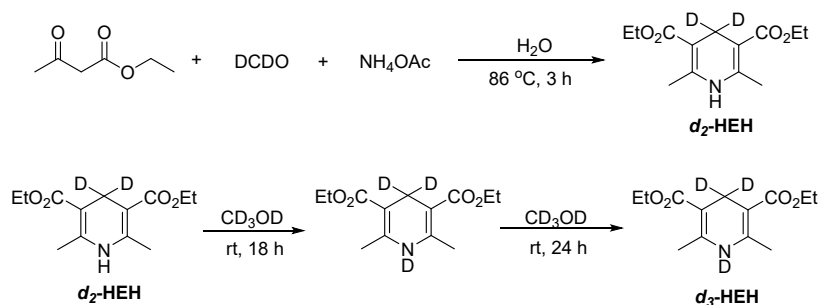

The deuterated Hantzsch esters was prepared according to the previous reported procedure.<sup>2</sup> In an oven-dried round bottom flask equipped with a magnetic stir bar, ethyl acetoacetate (1.5 mL, 12.0 mmol, 4.0 equiv),  $d_2$ -paraformaldehyde (96.1 mg, 3.0 mmol, 1.0 equiv), ammonium acetate (0.46 g, 6.0 mmol, 2.0 equiv) and water (6.0 mL) was added. The mixture was stirred vigorously at  $86\text{ }^\circ\text{C}$  in an oil bath for 3 hours. After cooling down to room temperature, the mixture was filtered and the obtained precipitate was dried to afford compound  $d_2$ -HEH (542.0 mg, 71% yield) as a yellow solid.

A solution of compound  $d_2$ -HEH (0.51 g, 2.0 mmol) in  $\text{CD}_3\text{OD}$  (4.0 mL) was stirred under Ar at room temperature for 18 h. The solvent was evaporated and another  $\text{CD}_3\text{OD}$  (2.0 mL) was added. The mixture was allowed to stir for another 24 h. The deuterated Hantzsch Esters was obtained after removing the solvent as a pale green solid (501.0 mg, 98% yield). The spectral data of deuterated Hantzsch Esters is consistent with the previous reports.<sup>2</sup>  $^1\text{H NMR}$  (400 MHz,  $\text{CDCl}_3$ )  $\delta$  4.17 (q,  $J = 7.1$  Hz, 4H), 2.19 (s, 6H), 1.29 (t,  $J = 7.1$  Hz, 6H).

### Deuterated Hantzsch esters used as the electron donor instead

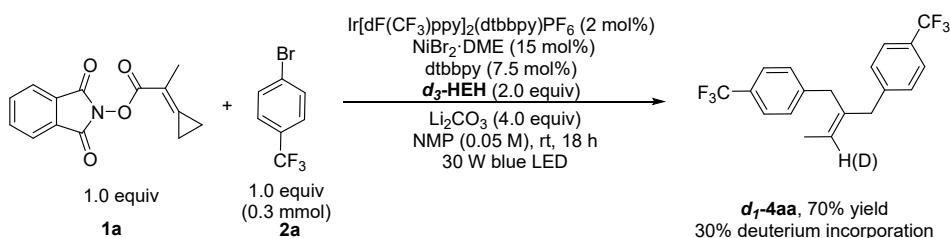

In a flame dried Schlenk tube (10 mL) equipped with a magnetic stir bar, substrate **1a** (77.1 mg, 0.3 mmol), **2a** (42  $\mu\text{L}$ , 0.3 mmol, 1.0 equiv),  $\text{Ir}[\text{dF}(\text{CF}_3)\text{ppy}]_2(\text{dtbbpy})\text{PF}_6$  (6.7 mg, 2 mol%),  $d_3$ -HEH (153.7 mg, 2.0 equiv), dtbbpy (6.0 mg, 7.5 mol%),  $\text{Li}_2\text{CO}_3$  (88.7 mg, 4.0 equiv),  $\text{NiBr}_2 \cdot \text{DME}$  (13.9



mg, 15 mol%) and degassed NMP (6.0 mL, 0.05 M) were added. The tube was degassed by alternating vacuum evacuation (10 min) and argon backfill for three times. The mixture was stirred for 10 min before being placed 5 cm away from the blue LED (30 W) and stirred for 18 h with a fan to maintain temperature. Upon completion, EtOAc (40 mL) was added into the tube and the mixture was washed with water for 3 times ( $3 \times 10$  mL), the organic layer was dried over  $\text{Na}_2\text{SO}_4$ , filtered, and concentrated to dryness. The crude was purified by a column chromatography on silica gel to afford the final product in 70% yield with 30% deuterium incorporation.

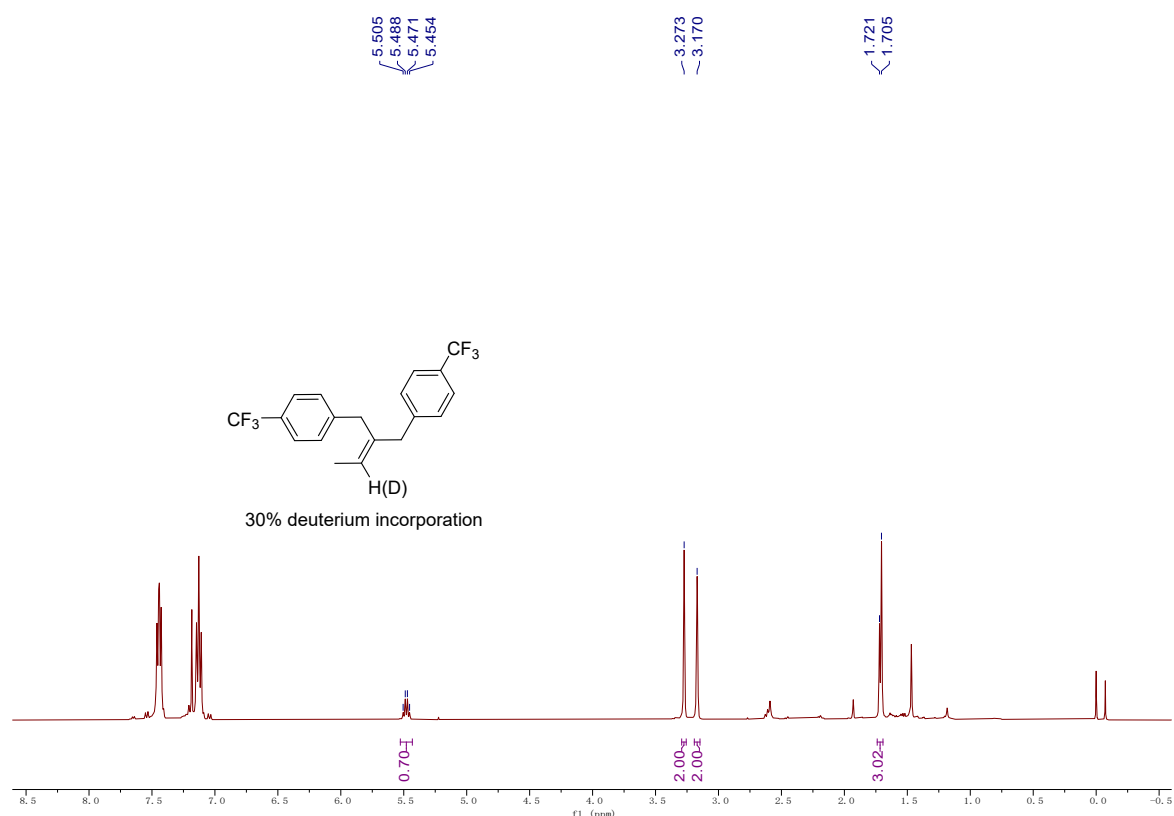

**Figure S9.**  $^1\text{H}$  NMR (400 MHz,  $\text{CDCl}_3$ ) spectrum of deuterium studies with  $d_3$ -HEH

### $\text{D}_2\text{O}$ was added under the standard conditions

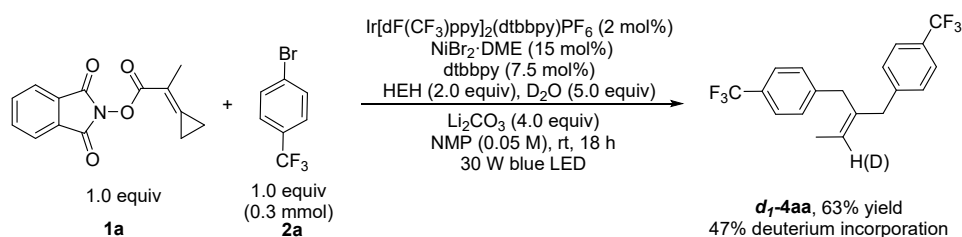

In a flame dried Schlenk tube (10 mL) equipped with a magnetic stir bar, substrate **1a** (77.1 mg, 0.3

mmol), **2a** (42  $\mu$ L, 0.3 mmol, 1.0 equiv), Ir[dF(CF<sub>3</sub>)ppy]<sub>2</sub>(dtbbpy)PF<sub>6</sub> (6.7 mg, 2 mol%), HEH (152.0 mg, 2.0 equiv), dtbbpy (6.0 mg, 7.5 mol%), Li<sub>2</sub>CO<sub>3</sub> (88.7 mg, 4.0 equiv), D<sub>2</sub>O (27  $\mu$ L, 5.0 equiv), NiBr<sub>2</sub>·DME (13.9 mg, 15 mol%) and degassed NMP (6.0 mL, 0.05 M) were added. The tube was degassed by alternating vacuum evacuation (10 min) and argon backfill for three times. The mixture was stirred for 10 min before being placed 5 cm away from the blue LED (30 W) and stirred for 18 h with a fan to maintain temperature. Upon completion, EtOAc (40 mL) was added into the tube and the mixture was washed with water for 3 times (3  $\times$  10 mL), the organic layer was dried over Na<sub>2</sub>SO<sub>4</sub>, filtered, and concentrated to dryness. The crude was purified by a column chromatography on silica gel to afford the final product (containing a trace amount of impurities that failed to be separated) in 63% yield with 47% deuterium incorporation.

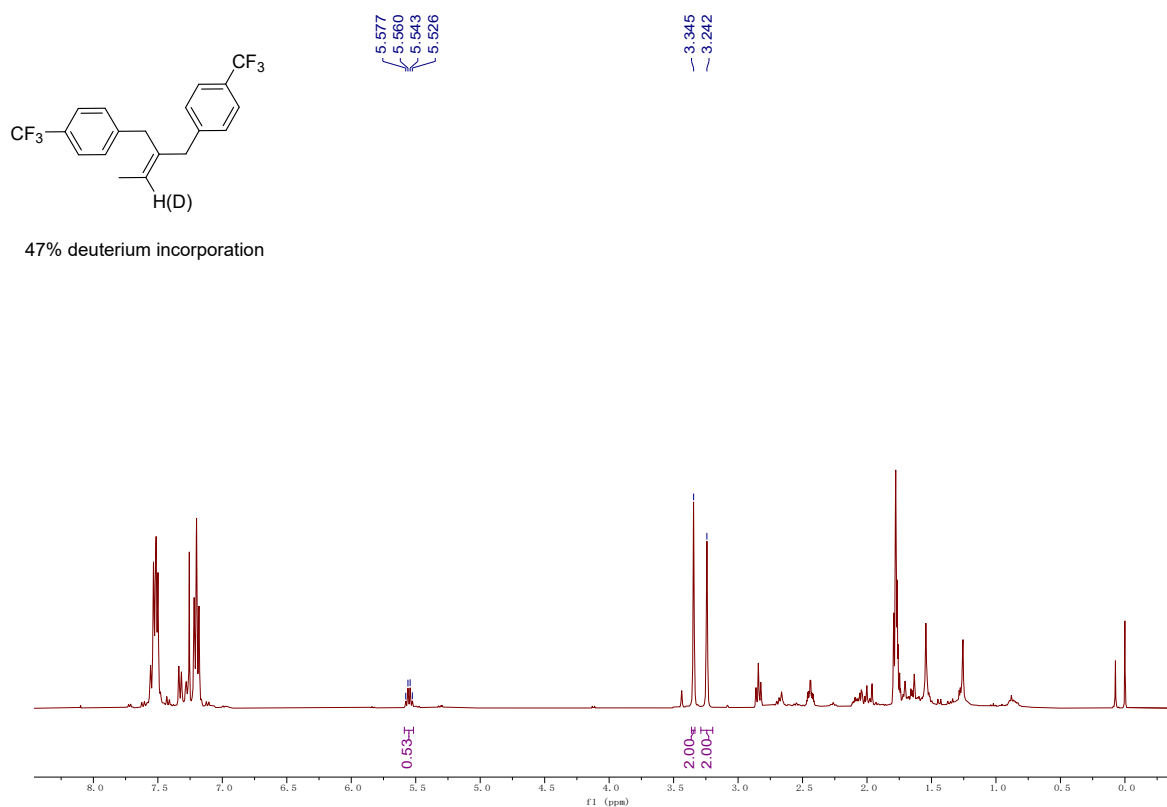

**Figure S10.** <sup>1</sup>H NMR (400 MHz, CDCl<sub>3</sub>) spectrum of deuterium studies with D<sub>2</sub>O

## 5.9 Crossover experiment

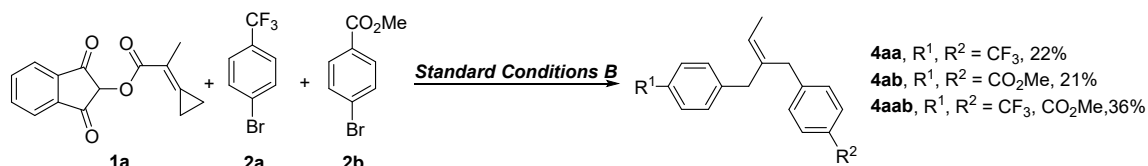

In a flame dried Schlenk tube (10 mL) equipped with a magnetic stir bar, substrate **1a** (77.1 mg, 0.3 mmol), **2a** (21  $\mu$ L, 0.15 mmol), **2b** (32.2 mg, 0.15 mmol), Ir[dF(CF<sub>3</sub>)ppy]<sub>2</sub>(dtbbpy)PF<sub>6</sub> (6.7 mg, 2 mol%), HEH (152.0 mg, 2.0 equiv), dtbbpy (6.0 mg, 7.5 mol%), Li<sub>2</sub>CO<sub>3</sub> (88.7 mg, 4.0 equiv), NiBr<sub>2</sub>·DME (13.9 mg, 15 mol%) and degassed NMP (6.0 mL, 0.05 M) were added. The tube was degassed by alternating vacuum evacuation (10 min) and argon backfill for three times. The mixture was stirred for 10 min before being placed 5 cm away from the blue LED (30 W) and stirred for 18 h with a fan to maintain temperature. Upon completion, EtOAc (40 mL) was added into the tube and the mixture was washed with water for 3 times (3  $\times$  10 mL), the organic layer was dried over Na<sub>2</sub>SO<sub>4</sub>, filtered, and concentrated to dryness. The crude was purified by a column chromatography on silica gel to afford product **4aa** in 22% yield and product **4ab** in 21% yield (yields were calculated on 0.15 mmol scale). Mixed coupling product **4aab** was also isolated as a colorless oil (19.0 mg, 36% yield, Z/E mixture). <sup>1</sup>H NMR (400 MHz, CDCl<sub>3</sub>)  $\delta$  7.97 – 7.92 (m, 2H), 7.55 – 7.50 (m, 2H), 7.23 – 7.14 (m, 4H), 5.58 – 5.50 (m, 1H), 3.91 (s, 3H, Z/E mixture), 3.34 (s, 2H), 3.23 (s, 2H), 1.78 (d, *J* = 5.4 Hz, 3H); <sup>13</sup>C NMR (151 MHz, CDCl<sub>3</sub>)  $\delta$  (167.08, 167.05, Z/E mixture), (145.3, 145.2, Z/E mixture), (144.0, 143.9, Z/E mixture), (136.6, 136.5, Z/E mixture), (129.8, 129.6, Z/E mixture), (129.3, 129.0, Z/E mixture), (128.8, 128.58, Z/E mixture), 128.63 (q, *J* = 31.9 Hz), [125.3 (q, *J* = 4.0 Hz), 125.2 (q, *J* = 4.0 Hz), Z/E mixture], 124.3 (q, *J* = 272.1 Hz), (124.0, 123.9, Z/E mixture), (52.009, 51.996, Z/E mixture), (43.1, 42.8, Z/E mixture), (35.1, 34.9, Z/E mixture), 13.8; <sup>19</sup>F NMR (565 MHz, CDCl<sub>3</sub>)  $\delta$  -62.3; IR (neat):  $\nu$  2972, 2894, 1722, 1416, 1325, 1088, 1046, 880 cm<sup>-1</sup>; HRMS (DART) *m/z*: [M+H]<sup>+</sup> Calcd. for C<sub>20</sub>H<sub>19</sub>F<sub>3</sub>O<sub>2</sub> 349.1410; found 349.1408.

## 5.10 Control Experiments with $(dtbbpy)Ni(p-CF_3Ar)Br$

### Synthesis of $(dtbbpy)Ni(p-CF_3Ar)Br$

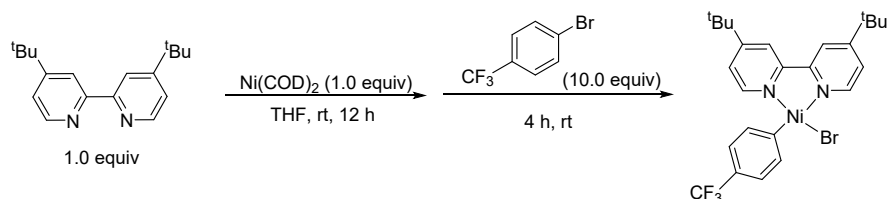

The  $(dtbbpy)Ni(p-CF_3Ar)Br$  was prepared according to the previous literature.<sup>6</sup> In an Ar-filled glove-box, a solution of  $Ni(COD)_2$  (275.1 mg, 1.0 mmol, 1.0 equiv) and 4,4'-di-tert-butyl-2,2'-bipyridine (268.4 mg, 1.0 mmol, 1.0 equiv) was stirred in dry THF (5.0 mL) for 12 h at room temperature, then 1-bromo-4-(trifluoromethyl)benzene (1.4 mL, 10.0 mmol, 10.0 equiv) into the dark purple solution. The mixture was stirred for another 4.0 h and the color turned into deep red. Dry pentane (30 mL) was added into the flask and the resulting mixture was filtered. The precipitate was washed with dry pentane ( $3 \times 10$  mL) and dried to afford  $(dtbbpy)Ni(p-CF_3Ar)Br$  (363.0 mg, 66% yield) as a brown solid. The product was directly used without further purification.

The  $^1H$ NMR data of  $(dtbbpy)Ni(p-CF_3Ar)Br$  were consistent with previously reported;<sup>6</sup>

$^1H$  NMR (400 MHz,  $CD_2Cl_2$ )  $\delta$  9.14 (s, 1H), 7.77 – 7.62 (m, 4H), 7.44 (br, 1H), 7.10 (br, 4H), 1.34 (s, 18H).

### Stoichiometric Experiments using $(dtbbpy)Ni(p-CF_3Ar)Br$ as catalyst

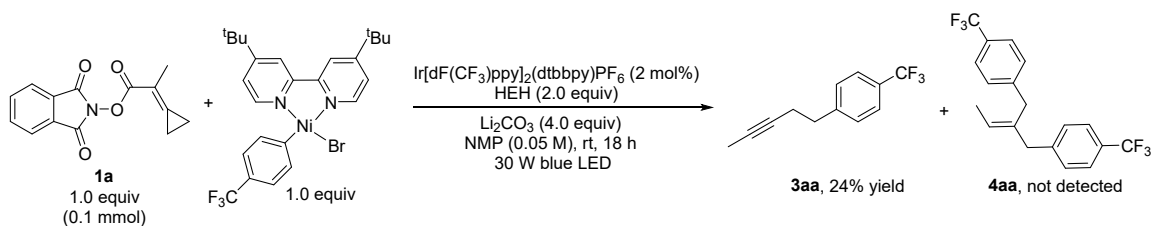

In an oven-dried Schlenk tube (10 mL) equipped with a magnetic stir bar, substrate **1a** (25.7 mg, 0.1 mmol),  $Ir[dF(CF_3)ppy]_2(dtbbpy)PF_6$  (2.2 mg, 2 mol%) HEH (50.6 mg, 2.0 equiv), and  $Li_2CO_3$  (29.5 mg, 4.0 equiv) were added. The reaction tube was degassed by alternating vacuum evacuation (10 min) and argon backfill for three times. Then the reaction tube was brought into the Ar-filled glove-box, where  $(dtbbpy)Ni(p-CF_3Ar)Br$  (55.2 mg, 1.0 equiv) and degassed NMP (2.0 mL, 0.05 M) were added. The mixture was stirred for 10 min before removed from the glove-box. Then the reaction

tube was placed 5.0 cm away from the blue LED (30 W) and stirred for 18 h at room temperature. Upon completion, 1,3,5-trimethoxybenzene (16.8 mg, 1.0 equiv) used as an internal standard was added after removal of the tube from the light source. EtOAc (15 mL) was added into the tube and the mixture was washed with water for 3 times ( $3 \times 5$  mL), the organic layer was dried over anhydrous  $\text{Na}_2\text{SO}_4$ , filtered, and concentrated to dryness. The crude product was analyzed by  $^1\text{H}$  NMR.

### Stoichiometric Experiments using $(dtbbpy)Ni(p\text{-CF}_3Ar)Br$ as catalyst in the absence of HEH

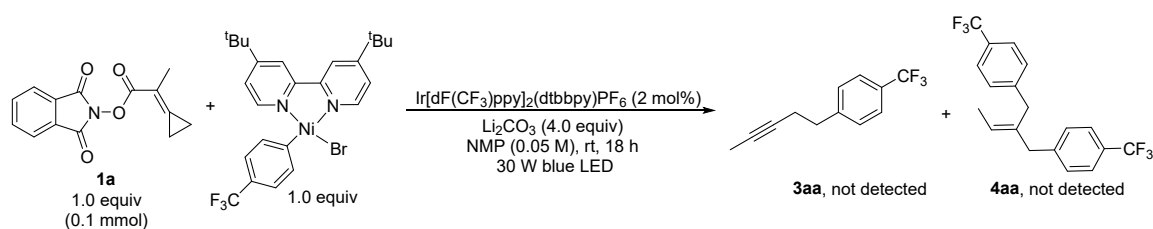

In an oven-dried Schlenk tube (10 mL) equipped with a magnetic stir bar, substrate **1a** (25.7 mg, 0.1 mmol),  $\text{Ir}[\text{dF}(\text{CF}_3)\text{ppy}]_2(\text{dtbbpy})\text{PF}_6$  (2.2 mg, 2 mol%), and  $\text{Li}_2\text{CO}_3$  (29.5 mg, 4.0 equiv) were added. The reaction tube was degassed by alternating vacuum evacuation (10 min) and argon backfill for three times. Then the reaction tube was brought into the Ar-filled glove-box, where  $(dtbbpy)Ni(p\text{-CF}_3Ar)Br$  (55.2 mg, 1.0 equiv) and degassed NMP (2.0 mL, 0.05 M) were added. The mixture was stirred for 10 min before removed from the glove-box. Then the reaction tube was placed 5.0 cm away from the blue LED (30 W) and stirred for 18 h at room temperature. Upon completion, 1,3,5-trimethoxybenzene (16.8 mg, 1.0 equiv) used as an internal standard was added after removal of the tube from the light source. EtOAc (15 mL) was added into the tube and the mixture was washed with water for 3 times ( $3 \times 5$  mL), the organic layer was dried over anhydrous  $\text{Na}_2\text{SO}_4$ , filtered, and concentrated to dryness. The crude product was analyzed by  $^1\text{H}$  NMR. The product **3aa** and product **4aa** were not detected under this condition.

### Stoichiometric Experiments using $(dtbbpy)Ni(p\text{-CF}_3Ar)Br$ as catalyst in the absence of photocatalyst

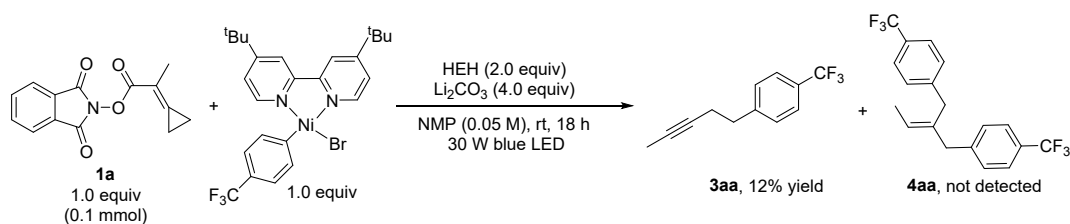

In an oven-dried Schlenk tube (10 mL) equipped with a magnetic stir bar, substrate **1a** (25.7 mg, 0.1 mmol), HEH (50.6 mg, 2.0 equiv), and Li<sub>2</sub>CO<sub>3</sub> (29.5 mg, 4.0 equiv) were added. The reaction tube was degassed by alternating vacuum evacuation (10 min) and argon backfill for three times. Then the reaction tube was brought into the Ar-filled glove-box, where *(dtbbpy)Ni(p-CF<sub>3</sub>Ar)Br* (55.2 mg, 1.0 equiv) and degassed NMP (2.0 mL, 0.05 M) were added. The mixture was stirred for 10 min before removed from the glove-box. Then the reaction tube was placed 5.0 cm away from the blue LED (30 W) and stirred for 18 h at room temperature. Upon completion, 1,3,5-trimethoxybenzene (16.8 mg, 1.0 equiv) used as an internal standard was added after removal of the tube from the light source. EtOAc (15 mL) was added into the tube and the mixture was washed with water for 3 times (3 × 5 mL), the organic layer was dried over anhydrous Na<sub>2</sub>SO<sub>4</sub>, filtered, and concentrated to dryness. The crude product was analyzed by <sup>1</sup>H NMR.

### Substoichiometric experiments using *(dtbbpy)Ni(p-CF<sub>3</sub>Ar)Br* as catalyst

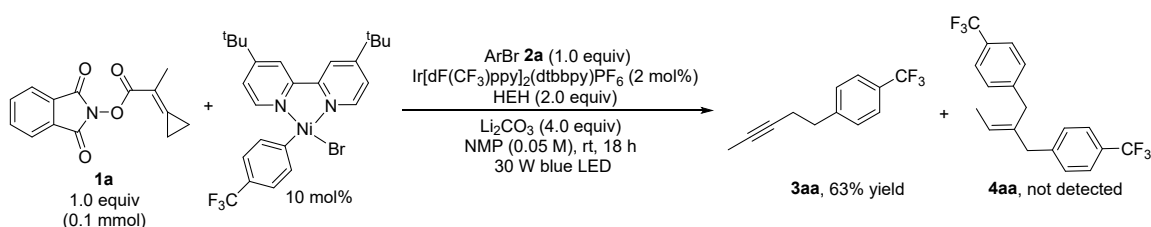

In an oven-dried Schlenk tube (10 mL) equipped with a magnetic stir bar, substrate **1a** (25.7 mg, 0.1 mmol), **2a** (14 μL, 0.1 mmol, 1.0 equiv), Ir[dF(CF<sub>3</sub>)ppy]<sub>2</sub>(dtbbpy)PF<sub>6</sub> (2.2 mg, 2 mol%), HEH (50.6 mg, 2.0 equiv), and Li<sub>2</sub>CO<sub>3</sub> (29.5 mg, 4.0 equiv) were added. The reaction tube was degassed by alternating vacuum evacuation (10 min) and argon backfill for three times. Then the reaction tube was brought into the Ar-filled glove-box, where *(dtbbpy)Ni(p-CF<sub>3</sub>Ar)Br* (5.5 mg, 0.1 mmol, 10mol%) and degassed NMP (2.0 mL, 0.05 M) were added. The mixture was stirred for 10 min before removed from the glove-box. Then the reaction tube was placed 5.0 cm away from the blue LED (30 W) and stirred for 18 h at room temperature. Upon completion, 1,3,5-trimethoxybenzene

(16.8 mg, 1.0 equiv) used as an internal standard was added after removal of the tube from the light source. EtOAc (15 mL) was added into the tube and the mixture was washed with water for 3 times ( $3 \times 5$  mL), the organic layer was dried over anhydrous  $\text{Na}_2\text{SO}_4$ , filtered, and concentrated to dryness. The crude product was analyzed by  $^1\text{H}$  NMR.

### Substoichiometric experiments using $(dtbbpy)Ni(p\text{-CF}_3Ar)Br$ as catalyst with external $\text{NiBr}_2 \cdot \text{DME}$

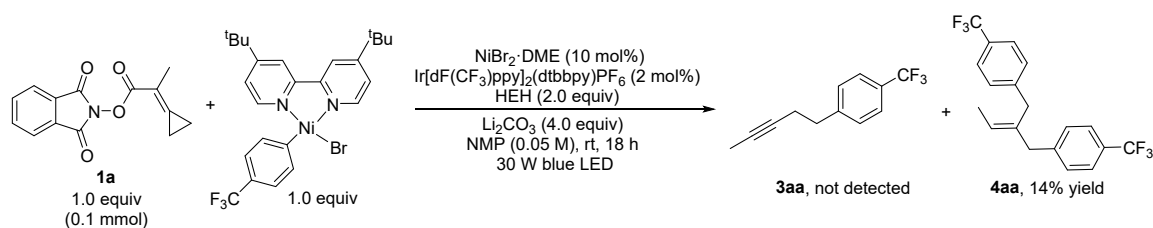

In an oven-dried Schlenk tube (10 mL) equipped with a magnetic stir bar, substrate **1a** (25.7 mg, 0.1 mmol),  $\text{Ir}[\text{dF}(\text{CF}_3)\text{ppy}]_2(\text{dtbbpy})\text{PF}_6$  (2.2 mg, 2 mol%) HEH (50.6 mg, 2.0 equiv), and  $\text{Li}_2\text{CO}_3$  (29.5 mg, 4.0 equiv) were added. The reaction tube was degassed by alternating vacuum evacuation (10 min) and argon backfill for three times. Then the reaction tube was brought into the Ar-filled glove-box, where  $\text{NiBr}_2 \cdot \text{DME}$  (3.1 mg, 10 mol%),  $(dtbbpy)Ni(p\text{-CF}_3Ar)Br$  (55.2 mg, 1.0 equiv) and degassed NMP (2.0 mL, 0.05 M) were added. The mixture was stirred for 10 min before removed from the glove-box. Then the reaction tube was placed 5.0 cm away from the blue LED (30 W) and stirred for 18 h at room temperature. Upon completion, 1,3,5-trimethoxybenzene (16.8 mg, 1.0 equiv) used as an internal standard was added after removal of the tube from the light source. EtOAc (15 mL) was added into the tube and the mixture was washed with water for 3 times ( $3 \times 5$  mL), the organic layer was dried over anhydrous  $\text{Na}_2\text{SO}_4$ , filtered, and concentrated to dryness. The crude product was analyzed by  $^1\text{H}$  NMR spectroscopic data.

## 6. Analysis of internal mixtures and some unsuccessful examples

### 6.1 Analysis of internal mixtures.

Under conditions A, the internal reaction mixture includes the alkyne product **3**, the dehalogenation product from ArBr, and the corresponding pyridine compound (HP) converted from HEH. In addition, some other complexes also existed in the reaction mixture that failed to figure out their structures.

Herein we take the substrate **1k** as an example, we isolated the alkyne product **3kb** in 71% yield and the dehalogenation product in 21% yield. The corresponding pyridine compound (HP) was also isolated (> 95% conversion). We also isolated other complexes and analyzed them through <sup>1</sup>H NMR, the structures of these complexes were difficult to figure out.

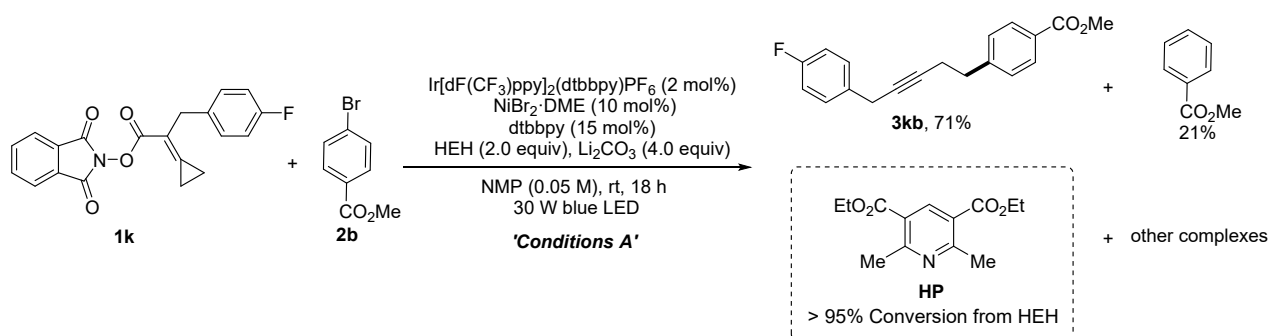

Under conditions B, the internal reaction mixture includes the dibenzylethylene product **4**, the dehalogenation product from ArBr, and the corresponding pyridine compound (HP). In addition, some other complexes also existed under such conditions.

Herein we still take the substrate **1k** as an example, we isolated the alkyne product **4kb** in 63% yield and the dehalogenation product in 18% yield. The corresponding pyridine compound (HP) was also isolated (> 95% conversion). Other complexes were also isolated and analyzed through <sup>1</sup>H NMR, but the structures of these complexes failed to be figured out.



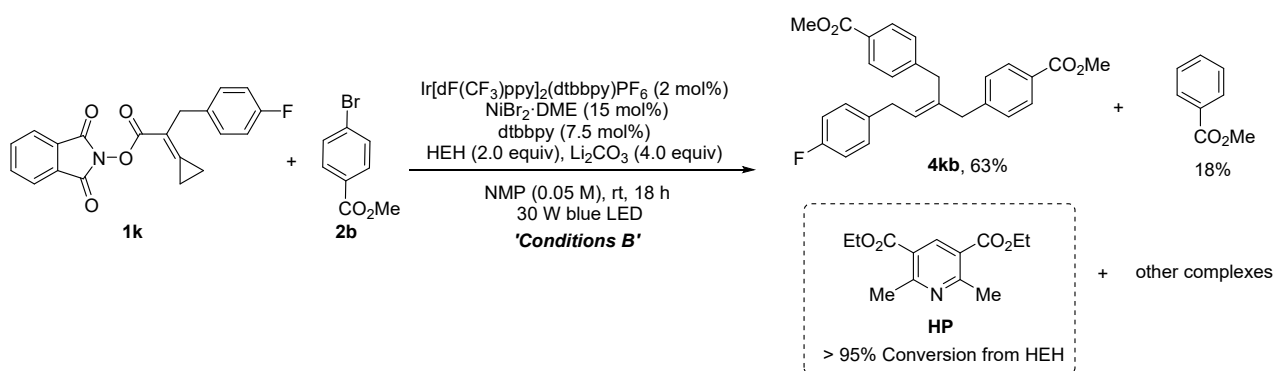

## 6.2 Analysis of some unsuccessful examples.

In the process of exploring the substrate scope, we found some unsuccessful examples. Herein we take the product **4fb** and **4ar** as an example to analyze the internal transformations.

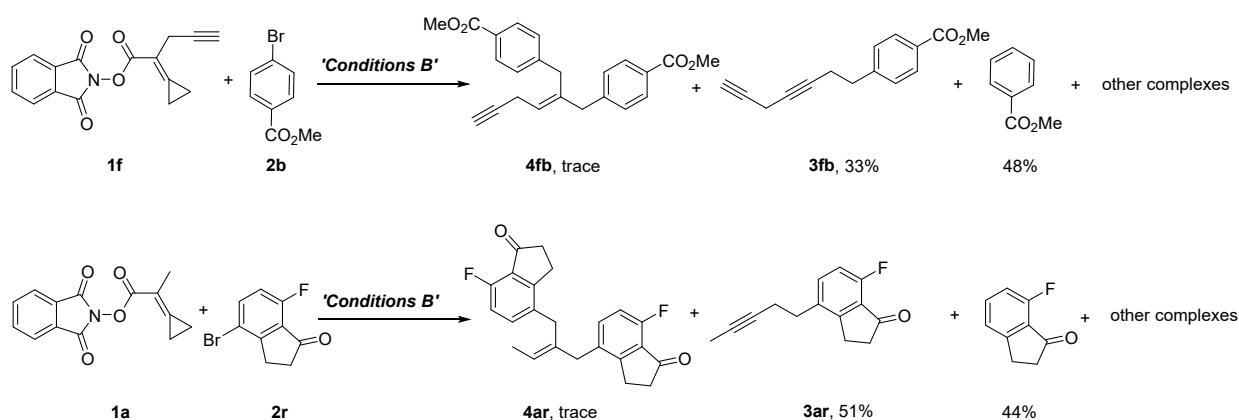

When we tried to obtain products **4fb** and **4ra** using conditions B, the double aryl groups coupling products were observed only in trace amounts. However, the corresponding alkyne products (**3fb** and **3ar**) were isolated in 33% and 51% yield, respectively. We speculated that coordination between the free nickel species with the substrates (coordination with the alkynyl group in substrate **1f** and coordination with oxygen atom and fluorine atom in substrate **2r**) may restrict its catalytic ability to undergo cyclopropane insertion. Therefore, the radical rearrangement process would proceed smoothly to deliver the alkyne products. In addition, dehalogenation products were also isolated under conditions B. Notably, the structure of a small number of other complexes still could not be determined.



**Scheme S2. Another possible mechanism involving the aryl transfer event occurring between  $L_nNi^{II}ArBr$  (B) and nickel(III)acyclobutane species (d).**

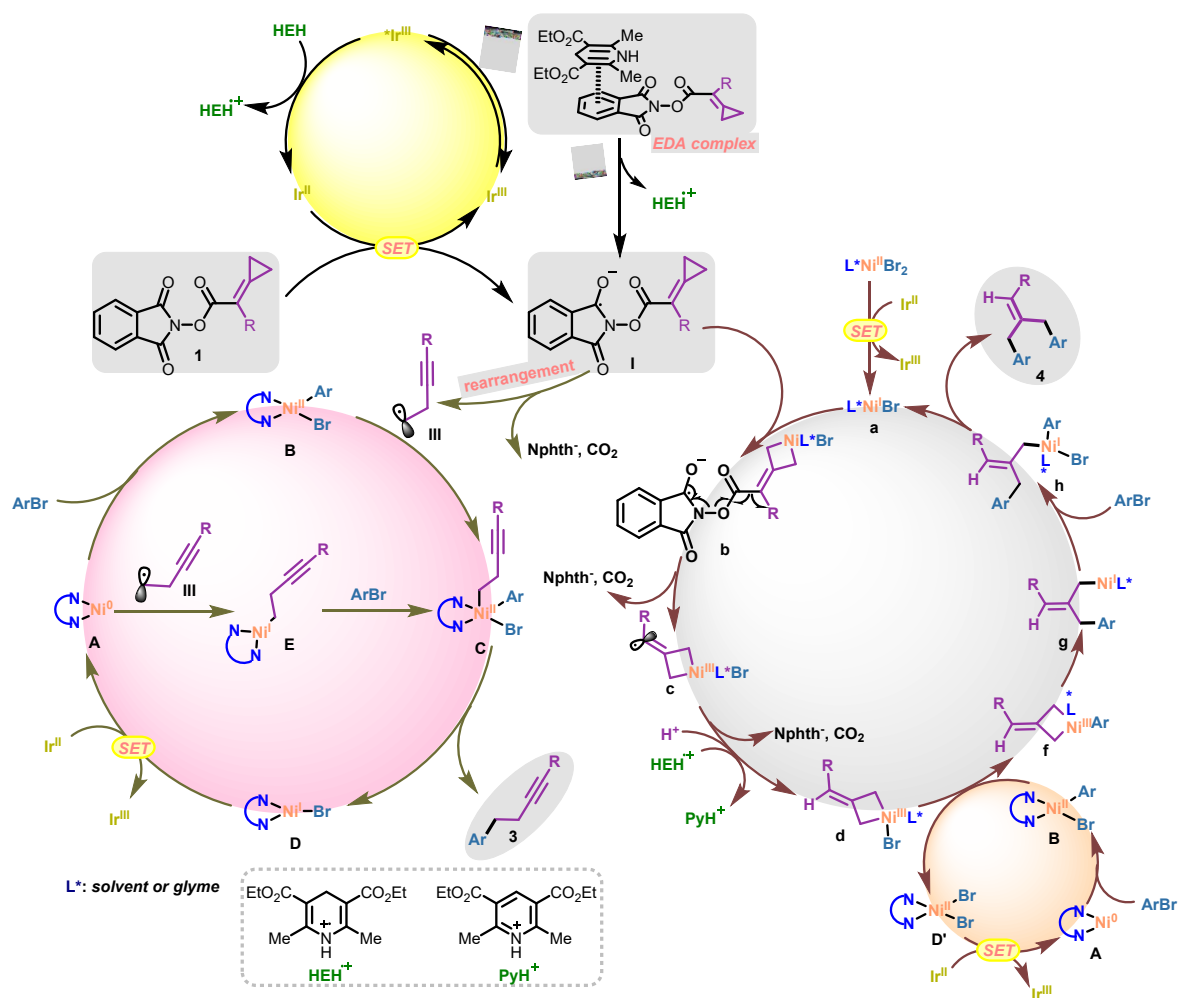

## 8. Synthetic Applications

### Scheme S3. Gram-scale reactions and synthetic transformations

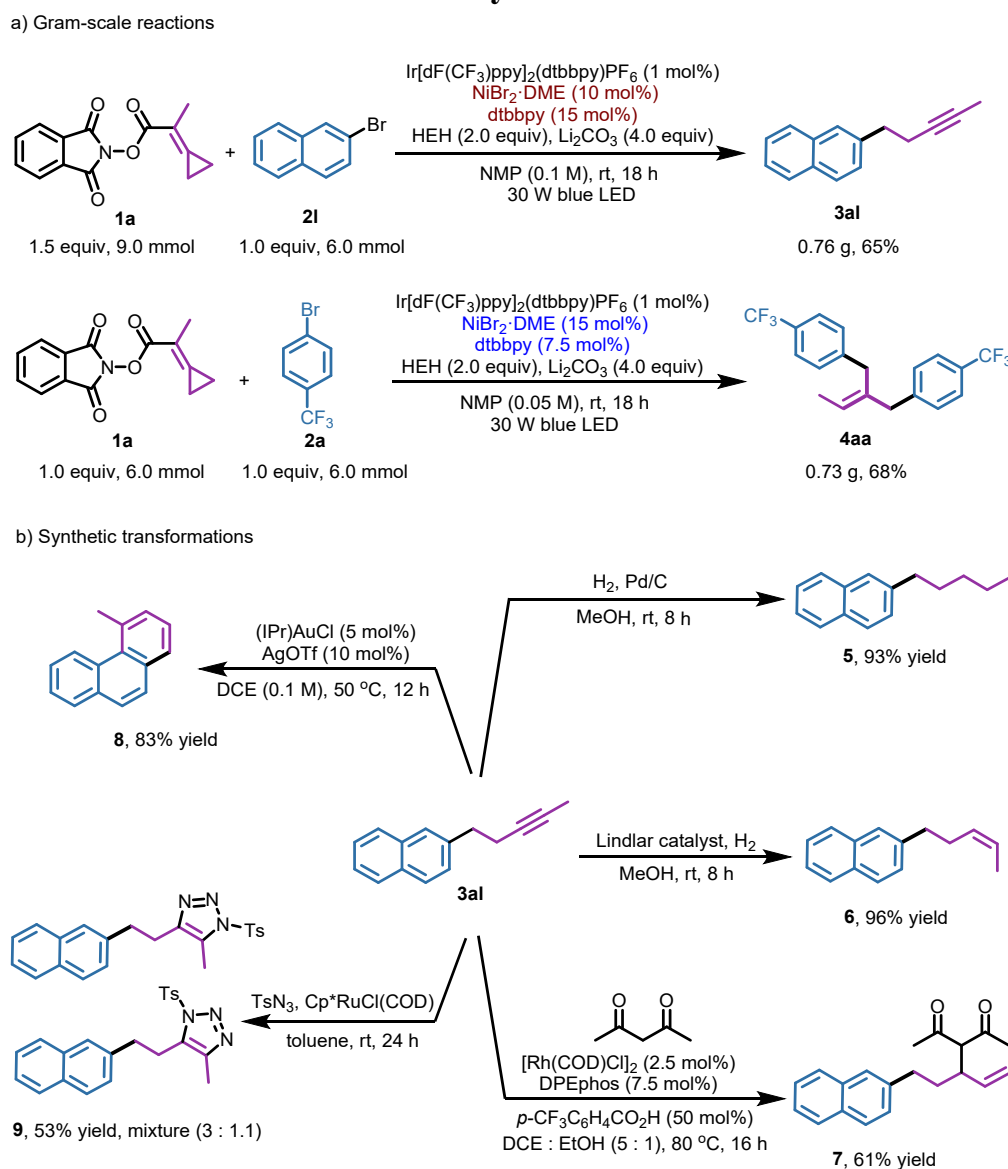

To investigate the synthetic applicability of the nickel-catalyzed protocol for the synthesis of alkynes, we conducted a gram-scale reaction (6.0 mmol) using the redox-active substrate **1a** and **2l** under the standard conditions A, where the loading of photocatalyst decreased to 1.0 mol%. The coupling product **3al** could be obtained in 65% yield. In addition, dibenzylethylene product **4aa** was also obtained in 68% yield through a gram-scale reaction (6.0 mmol) under the conditions B (Scheme S3a). Considering that alkynes are versatile building blocks for the diverse transformations in synthetic chemistry, product **3al** was selected to carry out some feasible transformations (Scheme S3b). The corresponding alkane **5** and alkene **6** could be obtained in 93% and 96% yields by

hydrogenation or partial hydrogenation of **3al**. A rhodium-catalyzed addition of **3al** with 1,3-diketone was conducted to regioselectively afford the branched  $\alpha$ -allylated 1,3-dicarbonyl product **7** in 61% yield. The intramolecular hydroarylation reaction of **3al** was realized utilizing the electrophilic (IPr)AuCl/AgOTf catalytic system, giving the 4-methylphenanthrene **8** in 83% yield. Ruthenium-catalyzed click reaction of **3al** with tosyl azide afforded the [3 + 2] cycloaddition product **9** in 53% yield as a isomeric mixture (3 : 1.1).

### 8.1 Scale-up experiments of **1a**.

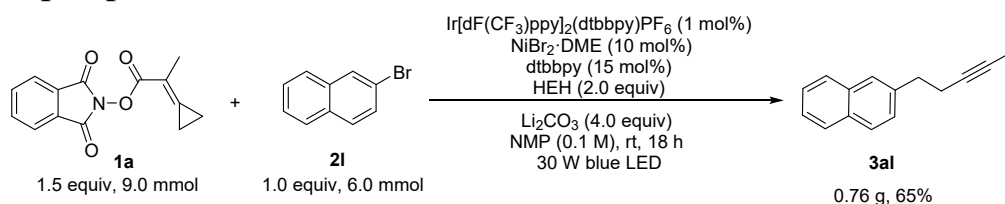

An oven-dried Schlenk tube (100 mL) equipped with a magnetic stir bar was added **1a** (2.3 g, 9.0 mmol, 1.5 equiv), **2l** (1.23 g, 6.0 mmol, 1.0 equiv), Ir[dF(CF<sub>3</sub>)ppy]<sub>2</sub>(dtbbpy)PF<sub>6</sub> (67.3 mg, 1 mol%), NiBr<sub>2</sub>·DME (185.1 mg, 10 mol%), dtbbpy (241.6 mg, 15 mol%), HEH (3.04 g, 2.0 equiv), and Li<sub>2</sub>CO<sub>3</sub> (1.77 g, 4.0 equiv). The tube was degassed by alternating vacuum evacuation (10 min) and argon backfill for three times. Then degassed NMP (60 mL, 0.1 M) was injected into the tube under Ar. The mixture was stirred for 15 min before placed 10 cm away from the blue LED (30 W) and stirred for 18 h at room temperature. Upon completion, EtOAc (120 mL) was added into the tube and the mixture was washed with water for 3 times (3 × 40 mL). The organic layer was dried over Na<sub>2</sub>SO<sub>4</sub>, filtered, and concentrated to dryness. The residue was purified by a flash column chromatography on silica gel (pure petroleum ether) to afford the product **3al** (0.76 g, 65% yield) as a colorless oil.

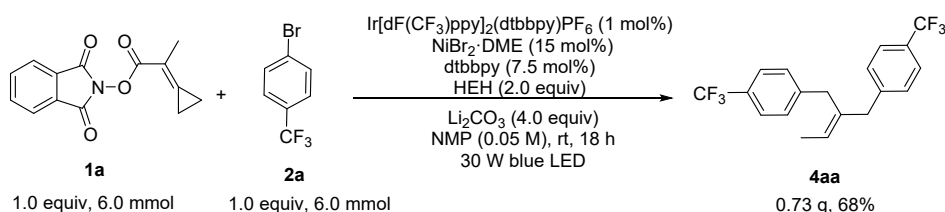

An oven-dried Schlenk tube (250 mL) equipped with a magnetic stir bar was added **1a** (1.54 g, 6.0 mmol, 1.0 equiv), **2a** (0.84 mL, 6.0 mmol, 1.0 equiv), Ir[dF(CF<sub>3</sub>)ppy]<sub>2</sub>(dtbbpy)PF<sub>6</sub> (67.3 mg, 1

mol%), NiBr<sub>2</sub>·DME (277.8 mg, 15 mol%), dtbbpy (120.8 mg, 7.5 mol%), HEH (3.04 g, 2.0 equiv), and Li<sub>2</sub>CO<sub>3</sub> (1.77 g, 4.0 equiv). The tube was degassed by alternating vacuum evacuation (10 min) and argon backfill for three times. Then degassed NMP (120 mL, 0.05 M) was injected into the tube under Ar. The mixture was stirred for 15 min before placed 10 cm away from the blue LED (30 W) and stirred for 18 h at room temperature. Upon completion, EtOAc (120 mL) was added into the tube and the mixture was washed with water for 3 times (3 × 60 mL). The organic layer was dried over Na<sub>2</sub>SO<sub>4</sub>, filtered, and concentrated to dryness. The residue was purified by a flash column chromatography on silica gel (pure petroleum ether) to afford the product **4aa** (0.73 g, 68% yield) as a colorless oil.

## 8.2 Product transformations

### Synthesis of Compound 5

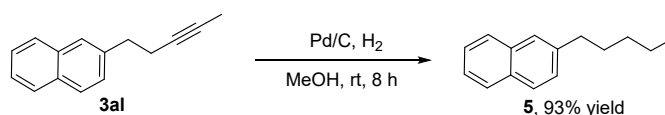

To a flask was added compound **3** (38.8 mg, 0.2 mmol), Pd/C (21.3 mg, 0.1 equiv, 10% Pd) and menthol (8.0 mL). The mixture was stirred vigorously at room temperature for 8 hours under 1 atm H<sub>2</sub>. Upon completion, the resulting mixture was filtered with a pad of celite. The filtrate was concentrated to dryness and the residue was purified by a flash column chromatography on silica gel (pure petroleum ether) to afford the product **5** (37.0 mg, 93% yield) as a colorless oil.

<sup>1</sup>H NMR (400 MHz, CDCl<sub>3</sub>) δ 7.90 – 7.74 (m, 3H), 7.65 (s, 1H), 7.53 – 7.41 (m, 2H), 7.37 (d, *J* = 8.4 Hz, 1H), 2.81 (t, *J* = 7.7 Hz, 2H), 1.81 – 1.69 (m, 2H), 1.47 – 1.33 (m, 4H), 0.94 (t, *J* = 6.6 Hz, 3H); <sup>13</sup>C NMR (151 MHz, CDCl<sub>3</sub>) δ 140.4, 133.6, 131.9, 127.7, 127.6, 127.44, 127.37, 126.3, 125.8, 124.9, 36.1, 31.5, 31.1, 22.6, 14.0; **IR (neat)**: ν 3051, 2955, 2926, 2855, 1633, 1600, 1507, 1465, 1376, 1269, 1018, 958, 887, 853, 814, 743 cm<sup>-1</sup>; **HRMS (DART)** *m/z*: [M]<sup>+</sup> Calcd. for C<sub>15</sub>H<sub>18</sub> 198.1403; found 198.1400.

### Synthesis of Compound 6

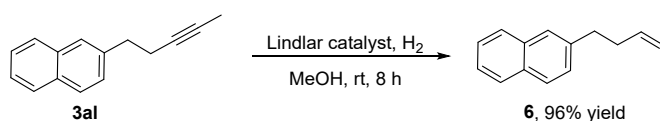

To a flask was added compound **3** (38.8 mg, 0.2 mmol), Lindlar catalyst (82.7 mg, 5 mol% 5% Pd) and menthol (10.0 mL). The mixture was stirred vigorously at room temperature for 8 hours under 1 atm H<sub>2</sub>. Upon completion, the resulting mixture was filtered with a pad of celite. The filtrate was concentrated to dryness and the residue was purified by a flash column chromatography on silica gel (pure petroleum ether) to afford the product **6** (37.8 mg, 96% yield) as a colorless oil.

**<sup>1</sup>H NMR** (400 MHz, CDCl<sub>3</sub>) δ 7.86 – 7.76 (m, 3H), 7.66 (s, 1H), 7.51 – 7.41 (m, 2H), 7.38 (dd, *J* = 8.4, 1.8 Hz, 1H), 5.58 – 5.44 (m, 2H), 2.86 (t, *J* = 7.8 Hz, 2H), 2.53 – 2.44 (m, 2H), 1.61 (d, *J* = 4.6 Hz, 3H); **<sup>13</sup>C NMR** (151 MHz, CDCl<sub>3</sub>) δ 139.7, 133.6, 132.0, 129.6, 127.7, 127.6, 127.42, 127.37, 126.4, 125.8, 125.0, 124.6, 35.9, 28.6, 12.8; **IR (neat)**: ν 3052, 3013, 2922, 2855, 1632, 1600, 1507, 1438, 1366, 1270, 1018, 960, 852, 815, 744 cm<sup>-1</sup>; **HRMS (DART)** *m/z*: [M]<sup>+</sup> Calcd. for C<sub>15</sub>H<sub>16</sub> 196.1247; found 196.1244.

### Synthesis of Compound **7**

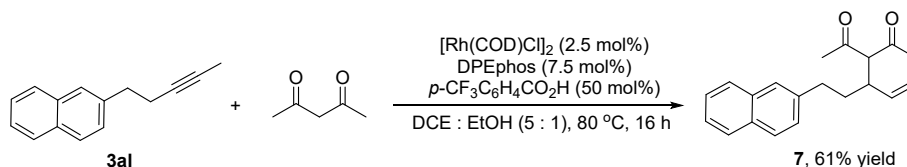

An oven-dried Schlenk tube (10 mL) equipped with a magnetic stir bar was added compound **3al** (77.7 mg, 0.4 mmol, 2.0 equiv), pentane-2,4-dione (21 μL, 0.2 mmol, 1.0 equiv), [Rh(COD)Cl]<sub>2</sub> (2.5 mg, 2.5 mol%), DPEphos (8.1 mg, 7.5 mol%), 4-(trifluoromethyl)benzoic acid (19.0 mg, 0.5 equiv). Then DCE (0.5 mL) and EtOH (0.1 mL) were injected into the tube. The mixture was allowed to stirred at 80 °C in an oil bath for 16 h. Upon completion, the solvent was removed under reduced pressure and the residue was purified by a flash column chromatography on silica gel (petroleum ether/ethyl acetate = 10/1) to afford the product **7** (36.0 mg, 61% yield) as a yellow oil.

**<sup>1</sup>H NMR** (400 MHz, CDCl<sub>3</sub>) δ 7.83 – 7.71 (m, 3H), 7.58 (s, 1H), 7.50 – 7.38 (m, 2H), 7.30 – 7.26 (m, 1H), 5.59 (ddd, *J* = 17.0, 10.3, 9.4 Hz, 1H), 5.24 – 5.14 (m, 2H), 3.72 (d, *J* = 10.5 Hz, 1H), 3.02 – 2.79 (m, 2H), 2.72 – 2.60 (m, 1H), 2.12 (s, 3H), 2.09 (s, 3H), 1.80 – 1.68 (m, 1H), 1.63 – 1.51 (m, 1H); **<sup>13</sup>C NMR** (151 MHz, CDCl<sub>3</sub>) δ 203.5, 203.3, 138.9, 137.5, 133.6, 132.0, 128.0, 127.6, 127.4, 127.1, 126.4, 126.0, 125.2, 118.5, 74.6, 44.0, 34.1, 33.2, 30.0, 29.5; **IR (neat)**: ν 3052, 2926, 1696, 1639, 1599, 1507, 1418, 1355, 1188, 1147, 999, 922, 856, 818, 748 cm<sup>-1</sup>; **HRMS (DART)** *m/z*:

[M+H]<sup>+</sup> Calcd. for C<sub>20</sub>H<sub>23</sub>O<sub>2</sub> 295.1693; found 295.1684.

### Synthesis of Compound **8**

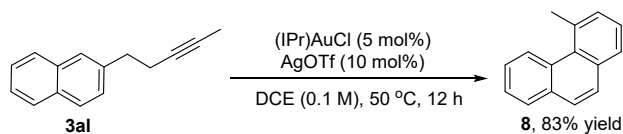

An oven-dried Schlenk tube (10 mL) equipped with a magnetic stir bar was added compound **3al** (19.4 mg, 0.1 mmol, 1.0 equiv), (IPr)AuCl (3.5 mg, 5 mol%), and AgOTf (2.5 mg, 10 mol%). Then DCE (1.0 mL, 0.1 M) was injected into the tube. The mixture was allowed to stirred at 50 °C in an oil bath for 12 h. Upon completion, the solvent was removed under reduced pressure and the residue was purified by a flash column chromatography on silica gel (pure petroleum ether) to afford the product **8** (16.0 mg, 83% yield) as a colorless oil.

<sup>1</sup>H NMR (400 MHz, CDCl<sub>3</sub>) δ 8.93 (d, *J* = 8.2 Hz, 1H), 7.93 (dd, *J* = 7.4, 2.0 Hz, 1H), 7.79 (dd, *J* = 6.3, 3.1 Hz, 1H), 7.73 (s, 2H), 7.67 – 7.57 (m, 2H), 7.52 – 7.49 (m, 2H), 3.17 (s, 3H); <sup>13</sup>C NMR (151 MHz, CDCl<sub>3</sub>) δ 135.5, 133.7, 133.5, 131.7, 131.2, 130.1, 128.7, 128.0, 127.5, 127.4, 127.1, 125.9, 125.8, 125.6, 27.4.

The spectroscopic data were consistent with those of previously reported.<sup>8</sup>



## Synthesis of Compound 9<sup>9</sup>

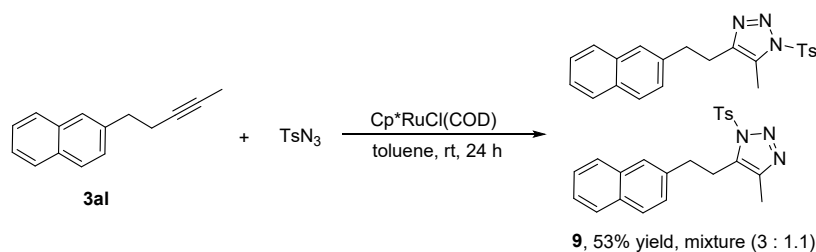

An oven-dried Schlenk tube (10 mL) equipped with a magnetic stir bar was added compound **3al** (38.8 mg, 0.2 mmol, 1.0 equiv), Cp<sup>\*</sup>RuCl(COD) (1.5 mg, 2 mol%), and toluene (2 mL, 0.1 M). Then TsN<sub>3</sub> (43 μL, 0.2 mmol, 1.0 equiv) was injected into the tube. The mixture was allowed to stirred at room temperature for 24 h. Upon completion, the solvent was removed under reduced pressure and the residue was purified by a flash column chromatography on silica gel (pure petroleum ether) to afford the product **9** (41.6 mg, 53% yield) as a yellow oil.

**<sup>1</sup>H NMR** (400 MHz, CDCl<sub>3</sub>, *mixture*) δ 7.96 (d, *J* = 8.9 Hz, 2H), 7.89 – 7.72 (m, 5H, *mixtures of major and minor isomer*), 7.68 – 7.60 (m, 1H), 7.51 (s, 1H), 7.48 – 7.41 (m, 3H), 7.34 (d, *J* = 8.0 Hz, 3H), 7.26 (d, *J* = 4.5 Hz, 1H), 7.15 (d, *J* = 8.3 Hz, 1H, *minor isomer*), 3.24 (t, *J* = 7.6 Hz, 2H), 3.13 – 3.04 (m, 3H, *mixtures of major and minor isomer*), 2.96 (t, *J* = 7.4 Hz, 1H, *minor isomer*), 2.46 (s, 1H, *minor isomer*), 2.43 (s, 3H), 2.07 (s, 1H, *minor isomer*), 1.94 (s, 3H); **<sup>13</sup>C NMR** (151 MHz, CDCl<sub>3</sub>) δ 146.8, 146.7 (*minor isomer*), 142.1, 138.2 (*minor isomer*), 137.4, 134.5, 134.12, 134.06 (*minor isomer*), 133.54, 133.49 (*minor isomer*), 132.2, 132.0 (*minor isomer*), 130.33, 130.30 (*minor isomer*), 128.5, 128.31 (*minor isomer*), 128.27, 127.9 (*minor isomer*), 127.7, 127.6 (*minor isomer*), 127.5, 127.4 (*minor isomer*), 127.1 (*minor isomer*), 127.0, 126.9, 126.7 (*minor isomer*), 126.2, 126.0 (*minor isomer*), 125.6, 125.4 (*minor isomer*), 35.7, 35.5 (*minor isomer*), 26.7 (*minor isomer*), 25.7, 21.9 (*minor isomer*), 21.8, 9.8, 8.7 (*minor isomer*); **IR (neat)**: ν 3050, 2923, 1708, 1630, 1599, 1222, 1164, 1121, 1032, 1009, 816, 749 cm<sup>-1</sup>; **HRMS (DART)** m/z: [M+H]<sup>+</sup> Calcd. for C<sub>22</sub>H<sub>22</sub>O<sub>6</sub>N<sub>3</sub>S 392.1427; found 392.1418.

## 9. Characterization Data of New Substrates

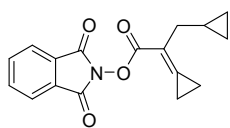

**1,3-dioxoisindolin-2-yl 3-cyclopropyl-2-cyclopropylidenepropanoate (1e):**

A white solid, 303.2 mg, 34% yield. M.p.: 126 – 128 °C. Eluent: PE/EA = 10/1.

$^1\text{H NMR}$  (400 MHz,  $\text{CDCl}_3$ )  $\delta$  7.89 (dd,  $J = 5.5, 3.1$  Hz, 2H), 7.78 (dd,  $J = 5.5, 3.1$  Hz, 2H), 2.44 (d,  $J = 7.0$  Hz, 2H), 1.68 – 1.58 (m, 2H), 1.47 – 1.38 (m, 2H), 1.09 – 0.96 (m, 1H), 0.54 – 0.45 (m, 2H), 0.20 – 0.11 (m, 2H);  $^{13}\text{C NMR}$  (151 MHz,  $\text{CDCl}_3$ )  $\delta$  162.9, 162.4, 144.7, 134.6, 129.1, 123.8, 118.4, 77.2, 77.0, 76.8, 36.0, 9.9, 6.2, 4.9, 4.2; **IR (neat):**  $\nu$  3080, 2996, 2928, 1795, 1739, 1468, 1363, 1185, 877, 696  $\text{cm}^{-1}$ ; **HRMS (ESI) m/z:**  $[\text{M}+\text{Na}]^+$  Calcd. for  $\text{C}_{17}\text{H}_{15}\text{NO}_4\text{Na}$  320.0893; found 320.0900.

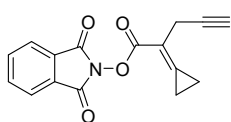

**1,3-dioxoisindolin-2-yl 2-cyclopropylidenepent-4-ynoate (1f):** A white solid,

522.8 mg, 62% yield. M.p.: 188 – 190 °C. Eluent: PE/EA = 10/1.  $^1\text{H NMR}$

(400 MHz,  $\text{CDCl}_3$ )  $\delta$  7.90 (dd,  $J = 5.5, 3.1$  Hz, 2H), 7.79 (dd,  $J = 5.5, 3.1$  Hz, 2H), 3.48 (dt,  $J = 2.9, 1.5$  Hz, 2H), 2.11 (t,  $J = 2.7$  Hz, 1H), 1.69 – 1.62 (m, 2H), 1.62 – 1.55 (m, 2H).  $^{13}\text{C NMR}$  (151 MHz,  $\text{CDCl}_3$ )  $\delta$  162.2, 161.9, 147.6, 134.7, 129.0, 123.9, 113.1, 79.7, 70.6, 21.0, 5.8, 4.8. **IR (neat):**  $\nu$  3271, 2985, 1800, 1745, 1407, 1363, 1185, 1028, 877  $\text{cm}^{-1}$ ; **HRMS (ESI) m/z:**  $[\text{M}+\text{Na}]^+$  Calcd. for  $\text{C}_{16}\text{H}_{11}\text{NO}_4\text{Na}$  304.0580; found 304.0581.

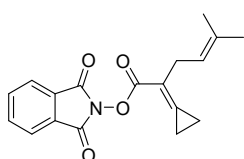

**1,3-dioxoisindolin-2-yl 2-cyclopropylidene-5-methylhex-4-enoate (1i):** A

white solid, 467.0 mg, 50% yield. M.p.: 88 – 90 °C. Eluent: PE/EA = 10/1.  $^1\text{H}$

**NMR** (400 MHz,  $\text{CDCl}_3$ )  $\delta$  7.89 (dd,  $J = 5.5, 3.1$  Hz, 2H), 7.78 (dd,  $J = 5.5, 3.1$  Hz, 2H), 5.32 – 5.24 (m, 1H), 3.22 (d,  $J = 7.3$  Hz, 2H), 1.71 (s, 3H), 1.66 (s, 3H), 1.63 – 1.56 (m, 2H), 1.42 – 1.32 (m, 2H);  $^{13}\text{C NMR}$  (151 MHz,  $\text{CDCl}_3$ )  $\delta$  162.7, 162.3, 144.6, 134.6, 133.4, 129.1, 123.8, 120.3, 117.8, 30.1, 25.7, 17.8, 6.1, 4.0; **IR (neat):**  $\nu$  2985, 2934, 1795, 1742, 1362, 1221, 1184, 1131, 878, 698  $\text{cm}^{-1}$ ; **HRMS (ESI) m/z:**  $[\text{M}+\text{Na}]^+$  Calcd. for  $\text{C}_{18}\text{H}_{17}\text{NO}_4\text{Na}$  334.1050; found 334.1047.

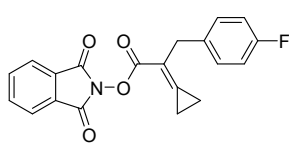

**1,3-dioxoisindolin-2-yl 2-cyclopropylidene-3-(4-fluorophenyl)**

**propanoate (1k):** A white solid, 474.0 mg, 45% yield. M.p.: 132 – 134 °C.

Eluent: PE/EA = 10/1. <sup>1</sup>H NMR (400 MHz, CDCl<sub>3</sub>) δ 7.88 (dd, *J* = 5.4, 3.1 Hz, 2H), 7.78 (dd, *J* = 5.5, 3.1 Hz, 2H), 7.24 – 7.15 (m, 2H), 7.03 – 6.92 (m, 2H), 3.82 (s, 2H), 1.67 – 1.57 (m, 2H), 1.30 – 1.19 (m, 2H); <sup>13</sup>C NMR (151 MHz, CDCl<sub>3</sub>) δ 162.6, , 162.2, 161.6 (d, *J* = 244.5 Hz), 146.6, 134.6, 134.3 (d, *J* = 3.5 Hz), 130.4 (d, *J* = 8.3 Hz), 129.0, 123.9, 117.8, 115.2 (d, *J* = 21.2 Hz), 36.4, 6.2, 4.0; <sup>19</sup>F NMR (565 MHz, CDCl<sub>3</sub>) δ -116.8; **IR (neat):** ν 2976, 2906, 1793, 1742, 1508, 1221, 1185, 878, 697 cm<sup>-1</sup>; **HRMS (ESI) m/z:** [M+Na]<sup>+</sup> Calcd. for C<sub>20</sub>H<sub>14</sub>NO<sub>4</sub>FNa 374.0799; found 374.0804.

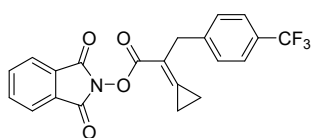

**1,3-dioxoisindolin-2-yl 2-cyclopropylidene-3-(4-(trifluoromethyl)phenyl)propanoate (1m):**

A white solid, 541.4 mg, 45% yield. M.p.: 120 – 122 °C. Eluent: PE/EA = 10/1. <sup>1</sup>H NMR (400 MHz, CDCl<sub>3</sub>) δ 7.88

(dd, *J* = 5.5, 3.1 Hz, 2H), 7.78 (dd, *J* = 5.5, 3.1 Hz, 2H), 7.55 (d, *J* = 8.0 Hz, 2H), 7.37 (d, *J* = 8.0 Hz, 2H), 3.91 (s, 2H), 1.71 – 1.62 (m, 2H), 1.32 – 1.23 (m, 2H); <sup>13</sup>C NMR (151 MHz, CDCl<sub>3</sub>) δ 162.5, 162.2, 147.4, 142.8, 134.7, 129.2, 129.0, 128.8 (q, *J* = 32.1 Hz), 125.3 (q, *J* = 4.2 Hz), 124.2 (q, *J* = 271.9 Hz), 123.9, 117.1, 37.0, 6.5, 4.1; <sup>19</sup>F NMR (565 MHz, CDCl<sub>3</sub>) δ -62.4; **IR (acetone):** ν 2987, 1795, 1742, 1361, 1323, 1120, 1066, 1017, 877, 696 cm<sup>-1</sup>; **HRMS (ESI) m/z:** [M+Na]<sup>+</sup> Calcd. for C<sub>21</sub>H<sub>14</sub>NO<sub>4</sub>F<sub>3</sub>Na 424.0767; found 424.0774.

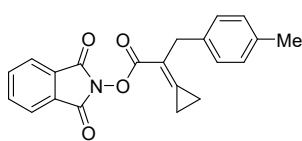

**1,3-dioxoisindolin-2-yl 2-cyclopropylidene-3-(p-tolyl) propanoate**

**(1n):** A white solid, 531.0 mg, 51% yield. M.p.: 102 – 104 °C. Eluent:

PE/EA = 10/1. <sup>1</sup>H NMR (400 MHz, CDCl<sub>3</sub>) δ 7.88 (dd, *J* = 5.4, 3.2 Hz, 2H), 7.78 (dd, *J* = 5.5, 3.1 Hz, 2H), 7.20 – 7.04 (m, 4H), 3.82 (s, 2H), 2.32 (s, 3H), 1.67 – 1.58 (m, 2H), 1.30 – 1.20 (m, 2H); <sup>13</sup>C NMR (151 MHz, CDCl<sub>3</sub>) δ 162.7, 162.3, 146.4, 135.9, 135.7, 134.8, 134.6, 129.4, 129.1, 128.9, 128.2, 124.0, 123.9, 118.0, 36.8, 21.1, 6.3, 4.1; **IR (acetone):** ν 2993, 2940, 1793, 1742, 1418, 1359, 1220, 1184, 878, 697 cm<sup>-1</sup>; **HRMS (ESI) m/z:** [M+Na]<sup>+</sup> Calcd. for C<sub>21</sub>H<sub>17</sub>NO<sub>4</sub>Na 370.1050; found 370.1057.

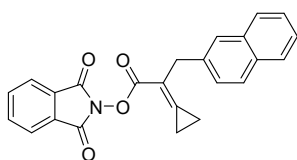

**1,3-dioxoisindolin-2-yl 2-cyclopropylidene-3-(naphthalen-2-yl)**

**propanoate (1p):** A white solid, 632.1 mg, 55% yield. M.p.: 155 – 157 °C.

Eluent: PE/EA = 10/1. **<sup>1</sup>H NMR** (400 MHz, CDCl<sub>3</sub>) δ 7.91 – 7.84 (m, 2H), 7.83 – 7.73 (m, 5H), 7.69 (s, 1H), 7.48 – 7.35 (m, 3H), 4.03 (s, 2H), 1.63 (t, *J* = 9.2 Hz, 2H), 1.21 (t, *J* = 9.2 Hz, 2H); **<sup>13</sup>C NMR** (151 MHz, CDCl<sub>3</sub>) δ 162.7, 162.3, 146.9, 136.2, 134.6, 133.5, 132.2, 129.1, 128.0, 127.6, 127.6, 127.5, 127.3, 125.9, 125.4, 123.8, 117.7, 37.3, 6.2, 4.2; **IR (neat):** ν 3052, 2985, 1793, 1741, 1363, 1185, 877, 696 cm<sup>-1</sup>; **HRMS** (ESI) *m/z*: [M+Na]<sup>+</sup> Calcd. for C<sub>24</sub>H<sub>17</sub>NO<sub>4</sub>Na 406.1050; found 406.1055.

## 10. Characterization Data of Products

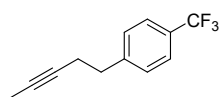

**methyl 4-(hex-3-yn-1-yl)benzoate (3aa):** A colorless oil, 31.8 mg, 75% yield.

Eluent: PE.  $^1\text{H NMR}$  (400 MHz,  $\text{CDCl}_3$ )  $\delta$  7.55 (d,  $J = 8.0$  Hz, 2H), 7.33 (d,  $J = 8.0$  Hz, 2H), 2.84 (t,  $J = 7.4$  Hz, 2H), 2.44 (tq,  $J = 7.5, 2.5$  Hz, 2H), 1.77 (t,  $J =$

2.5 Hz, 3H);  $^{13}\text{C NMR}$  (151 MHz,  $\text{CDCl}_3$ )  $\delta$  144.9, 128.8, 128.5 (q,  $J = 31.9$  Hz), 125.2 (q,  $J = 4.4$  Hz), 124.3 (q,  $J = 271.9$  Hz), 77.9, 76.7, 35.2, 20.6, 3.4;  $^{19}\text{F NMR}$  (565 MHz,  $\text{CDCl}_3$ )  $\delta$  -62.4; **IR**

(neat):  $\nu$  2924, 2216, 1734, 1618, 1325, 1163, 1122, 1067, 1019, 825  $\text{cm}^{-1}$ ; **HRMS** (EI)  $m/z$ :  $[\text{M}]^+$  Calcd. for  $\text{C}_{12}\text{H}_{11}\text{F}_3$  212.0807; found 212.0808.

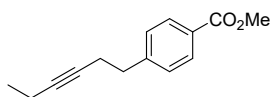

**methyl 4-(hex-3-yn-1-yl)benzoate (3bb):** A colorless oil, 31.6 mg, 73%

yield. Eluent: PE/EA = 10/1.  $^1\text{H NMR}$  (400 MHz,  $\text{CDCl}_3$ )  $\delta$  7.96 (d,  $J = 8.3$  Hz, 2H), 7.29 (d,  $J = 8.2$  Hz, 2H), 3.91 (s, 3H), 2.85 (t,  $J = 7.4$  Hz, 2H), 2.45

(tt,  $J = 7.5, 2.4$  Hz, 2H), 2.14 (qt,  $J = 7.5, 2.4$  Hz, 2H), 1.09 (t,  $J = 7.5$  Hz, 3H);  $^{13}\text{C NMR}$  (151 MHz,  $\text{CDCl}_3$ )  $\delta$  167.1, 146.4, 129.6, 128.6, 128.1, 82.9, 78.2, 52.0, 35.5, 20.6, 14.2, 12.3; **IR** (neat):

$\nu$  2954, 2924, 2850, 1723, 1435, 1278, 1109, 804, 690  $\text{cm}^{-1}$ ; **HRMS** (EI)  $m/z$ :  $[\text{M}]^+$  Calcd. for  $\text{C}_{14}\text{H}_{16}\text{O}_2$  216.1145; found 216.1146.

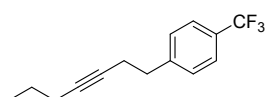

**1-(hept-3-yn-1-yl)-4-(trifluoromethyl)benzene (3ca):** A colorless oil, 34.0

mg, 71% yield. Eluent: PE.  $^1\text{H NMR}$  (400 MHz,  $\text{CDCl}_3$ )  $\delta$  7.54 (d,  $J = 8.3$  Hz, 2H), 7.33 (d,  $J = 8.2$  Hz, 2H), 2.85 (t,  $J = 7.4$  Hz, 2H), 2.47 (tt,  $J = 7.4,$

2.4 Hz, 2H), 2.10 (tt,  $J = 7.0, 2.4$  Hz, 2H), 1.53 – 1.41 (m, 2H), 0.93 (t,  $J = 7.4$  Hz, 3H);  $^{13}\text{C NMR}$  (151 MHz,  $\text{CDCl}_3$ )  $\delta$  145.0, 128.8, 128.5 (q,  $J = 32.5$  Hz), 125.2 (q,  $J = 4.1$  Hz), 124.3 (q,  $J = 272.1$

Hz), 81.5, 78.8, 35.2, 22.4, 20.7, 20.6, 13.4;  $^{19}\text{F NMR}$  (565 MHz,  $\text{CDCl}_3$ )  $\delta$  -62.4; **IR** (neat):  $\nu$  2973, 2934, 1618, 1322, 1162, 1121, 1107, 1066, 1019, 824  $\text{cm}^{-1}$ ; **HRMS** (EI)  $m/z$ :  $[\text{M}]^+$  Calcd. for

$\text{C}_{14}\text{H}_{15}\text{F}_3$  240.1120; found 240.1120.

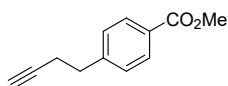

**methyl 4-(but-3-yn-1-yl)benzoate (3db):** A colorless oil, 26.3 mg, 70% yield.

Eluent: PE/EA = 15/1. **<sup>1</sup>H NMR** (400 MHz, CDCl<sub>3</sub>) δ 7.97 (d, *J* = 8.3 Hz, 2H),

7.30 (d, *J* = 8.2 Hz, 2H), 3.90 (s, 3H), 2.89 (t, *J* = 7.4 Hz, 2H), 2.51 (td, *J* = 7.4,

2.6 Hz, 2H), 1.97 (t, *J* = 2.6 Hz, 1H); **<sup>13</sup>C NMR** (151 MHz, CDCl<sub>3</sub>) δ 167.0, 145.7, 129.7, 128.5,

128.4, 83.2, 69.3, 52.0, 34.7, 20.1; **IR (neat):** ν 3294, 2927, 2120, 1745, 1719, 1611, 1435, 1280,

1184, 1111, 1020, 878, 698 cm<sup>-1</sup>; **HRMS** (EI) *m/z*: [M-H]<sup>+</sup> Calcd. for C<sub>12</sub>H<sub>11</sub>O<sub>2</sub> 187.0754; found

187.0754.

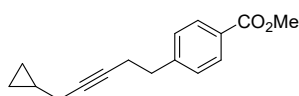

**methyl 4-(5-cyclopropylpent-3-yn-1-yl)benzoate (3eb):** A colorless oil,

36.8 mg, 76% yield. Eluent: PE/EA = 15/1. **<sup>1</sup>H NMR** (400 MHz, CDCl<sub>3</sub>) δ

7.96 (d, *J* = 8.3 Hz, 2H), 7.30 (d, *J* = 8.2 Hz, 2H), 3.90 (s, 3H), 2.85 (t, *J* =

7.4 Hz, 2H), 2.47 (tt, *J* = 7.5, 2.4 Hz, 2H), 2.18 (dt, *J* = 5.2, 2.4 Hz, 2H), 0.90 – 0.85 (m, 1H), 0.47 –

0.38 (m, 2H), 0.22 – 0.13 (m, 2H); **<sup>13</sup>C NMR** (151 MHz, CDCl<sub>3</sub>) δ 167.1, 146.3, 129.6, 128.6,

128.1, 79.7, 79.2, 52.0, 35.4, 22.9, 20.6, 9.6, 3.8; **IR (EtOH):** ν 2923, 2853, 1722, 1611, 1434, 1277,

1179, 1109, 1019, 767, 703 cm<sup>-1</sup>; **HRMS** (ESI) *m/z*: [M+H]<sup>+</sup> Calcd. for C<sub>16</sub>H<sub>19</sub>O<sub>2</sub> 243.1380; found

243.1383.

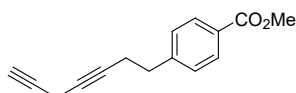

**methyl 4-(hepta-3,6-diyn-1-yl)benzoate (3fb):** A colorless oil, 16.3 mg,

36% yield. Eluent: PE/EA = 10/1. **<sup>1</sup>H NMR** (400 MHz, CDCl<sub>3</sub>) δ 7.97 (d,

*J* = 8.3 Hz, 2H), 7.29 (d, *J* = 8.2 Hz, 2H), 3.91 (s, 3H), 3.13 (dt, *J* = 4.8,

2.5 Hz, 2H), 2.87 (t, *J* = 7.4 Hz, 2H), 2.48 (tt, *J* = 7.5, 2.4 Hz, 2H), 2.07 (t, *J* = 2.7 Hz, 1H); **<sup>13</sup>C**

**NMR** (151 MHz, CDCl<sub>3</sub>) δ 167.1, 146.0, 129.7, 128.5, 128.3, 79.9, 78.6, 74.3, 68.6, 52.0, 34.9,

20.5, 9.5; **IR (neat):** ν 3281, 2951, 2926, 2140, 1717, 1610, 1435, 1281, 1180, 1111, 1020, 797, 705

cm<sup>-1</sup>; **HRMS** (EI) *m/z*: [M-H]<sup>+</sup> Calcd. for C<sub>15</sub>H<sub>13</sub>O<sub>2</sub> 225.0910; found 225.0908.

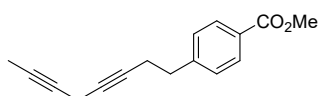

**methyl 4-(octa-3,6-diyn-1-yl)benzoate (3gb):** A colorless oil, 25.0 mg,

52% yield. Eluent: PE/EA = 10/1. **<sup>1</sup>H NMR** (400 MHz, CDCl<sub>3</sub>) δ 7.96 (d,

*J* = 8.3 Hz, 2H), 7.28 (d, *J* = 8.2 Hz, 2H), 3.90 (s, 3H), 3.10 – 3.04 (m,

2H), 2.85 (t, *J* = 7.5 Hz, 2H), 2.47 (tt, *J* = 7.5, 2.4 Hz, 2H), 1.79 (t, *J* = 2.6 Hz, 3H); **<sup>13</sup>C NMR** (151

MHz, CDCl<sub>3</sub>)  $\delta$  167.1, 146.1, 129.7, 128.6, 128.2, 79.2, 76.1, 75.7, 73.3, 52.0, 35.0, 20.5, 9.6, 3.5; **IR (neat)**:  $\nu$  2952, 2909, 2190, 1717, 1610, 1435, 1280, 1180, 1110, 1020, 766 cm<sup>-1</sup>; **HRMS (ESI)** m/z: [M+Na]<sup>+</sup> Calcd. for C<sub>16</sub>H<sub>16</sub>O<sub>2</sub>Na 263.1043; found 263.1043.

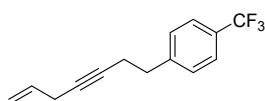

**1-(hept-6-en-3-yn-1-yl)-4-(trifluoromethyl)benzene (3ha)**: A colorless oil, 28.6 mg, 60% yield. Eluent: PE. **<sup>1</sup>H NMR** (400 MHz, CDCl<sub>3</sub>)  $\delta$  7.55 (d,  $J$  = 8.0 Hz, 2H), 7.34 (d,  $J$  = 7.9 Hz, 2H), 5.79 (ddt,  $J$  = 17.0, 10.2, 5.3 Hz, 1H), 5.23 (ddt,  $J$  = 17.0, 3.6, 1.8 Hz, 1H), 5.07 (ddt,  $J$  = 10.0, 3.6, 1.7 Hz, 1H), 2.96 – 2.90 (m, 2H), 2.88 (t,  $J$  = 7.4 Hz, 2H), 2.51 (tt,  $J$  = 7.4, 2.4 Hz, 2H); **<sup>13</sup>C NMR** (151 MHz, CDCl<sub>3</sub>)  $\delta$  167.7, 144.8, 134.3, 133.0, 128.8, 128.6 (q,  $J$  = 31.9 Hz), 125.2 (q,  $J$  = 4.1 Hz), 124.3 (q,  $J$  = 271.9 Hz), 123.6, 81.3, 77.9, 35.1, 23.0, 20.6; **<sup>19</sup>F NMR** (565 MHz, CDCl<sub>3</sub>)  $\delta$  -62.4; **IR (neat)**:  $\nu$  2973, 2923, 2900, 2211, 1618, 1418, 1323, 1162, 1120, 1108, 1066, 1019, 825, 714 cm<sup>-1</sup>; **HRMS (EI)** m/z: [M-H]<sup>+</sup> Calcd. for C<sub>14</sub>H<sub>12</sub>F<sub>3</sub> 237.0886; found 237.0886.

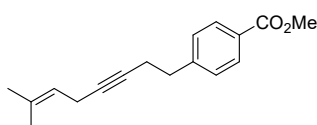

**methyl 4-(7-methyloct-6-en-3-yn-1-yl)benzoate (3ib)**: A colorless oil, 33.3 mg, 65% yield. Eluent: PE/EA = 10/1. **<sup>1</sup>H NMR** (400 MHz, CDCl<sub>3</sub>)  $\delta$  7.96 (d,  $J$  = 8.3 Hz, 2H), 7.28 (d,  $J$  = 8.3 Hz, 2H), 5.14 (tt,  $J$  = 6.9, 1.5 Hz, 1H), 3.90 (s, 3H), 2.89 – 2.79 (m, 4H), 2.46 (tt,  $J$  = 7.5, 2.4 Hz, 2H), 1.71 (s, 3H), 1.61 (s, 3H); **<sup>13</sup>C NMR** (151 MHz, CDCl<sub>3</sub>)  $\delta$  167.1, 146.3, 133.5, 129.6, 128.6, 128.1, 119.5, 80.1, 78.4, 52.0, 35.4, 25.5, 20.6, 17.8, 17.6; **IR (neat)**:  $\nu$  2979, 2954, 2912, 2201, 1719, 1611, 1435, 1280, 1180, 1111, 1020, 766 cm<sup>-1</sup>; **HRMS (ESI)** m/z: [M-H]<sup>+</sup> Calcd. for C<sub>17</sub>H<sub>19</sub>O<sub>2</sub> 255.1380; found 255.1380.

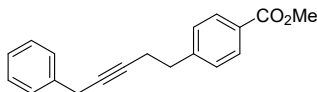

**methyl 4-(5-phenylpent-3-yn-1-yl)benzoate (3jb)**: A colorless oil, 40.0 mg, 72% yield. Eluent: PE/EA = 15/1. **<sup>1</sup>H NMR** (400 MHz, CDCl<sub>3</sub>)  $\delta$  7.96 (d,  $J$  = 8.2 Hz, 2H), 7.33 – 7.17 (m, 7H), 3.91 (s, 3H), 3.54 (t,  $J$  = 2.5 Hz, 2H), 2.88 (t,  $J$  = 7.4 Hz, 2H), 2.54 (tt,  $J$  = 7.4, 2.5 Hz, 2H); **<sup>13</sup>C NMR** (151 MHz, CDCl<sub>3</sub>)  $\delta$  167.1, 146.2, 137.2, 129.7, 128.6, 128.4, 128.2, 127.8, 126.4, 81.2, 78.9, 52.0, 35.2, 25.0, 20.6; **IR (neat)**:  $\nu$  3032, 2951, 2853, 1717, 1611, 1435, 1324, 1279, 1179, 1109, 1066, 1019, 764, 702 cm<sup>-1</sup>; **HRMS (EI)** m/z: [M]<sup>+</sup> Calcd. for C<sub>19</sub>H<sub>18</sub>O<sub>2</sub> 278.1301; found 278.1304.

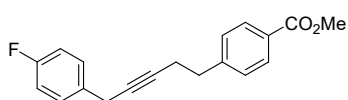

**methyl 4-(5-(4-fluorophenyl)pent-3-yn-1-yl)benzoate (3kb):** A colorless oil, 42.0 mg, 71% yield. Eluent: PE/EA = 10/1. **<sup>1</sup>H NMR** (400 MHz, CDCl<sub>3</sub>) δ 7.96 (d, *J* = 8.3 Hz, 2H), 7.29 (d, *J* = 8.1 Hz, 2H), 7.22 – 7.16 (m, 2H), 7.00 – 6.91 (m, 2H), 3.91 (s, 3H), 3.50 (t, *J* = 2.7 Hz, 2H), 2.88 (t, *J* = 7.3 Hz, 2H), 2.55 (tt, *J* = 7.4, 2.4 Hz, 2H); **<sup>13</sup>C NMR** (151 MHz, CDCl<sub>3</sub>) δ 167.1, 161.6 (d, *J* = 244.2 Hz), 132.8 (d, *J* = 3.5 Hz), 129.9, 129.7, 129.2 (d, *J* = 8.3 Hz), 128.6, 128.3, 128.2, 115.1 (d, *J* = 21.5 Hz), 81.4, 78.8, 52.0, 35.2, 24.3, 20.5; **<sup>19</sup>F NMR** (565 MHz, CDCl<sub>3</sub>) δ -116.9; **IR (neat):** ν 2948, 2912, 2192, 1716, 1609, 1507, 1435, 1277, 1222, 1109, 1019, 837, 765, 704 cm<sup>-1</sup>; **HRMS (ESI)** m/z: [M+H]<sup>+</sup> Calcd. for C<sub>19</sub>H<sub>18</sub>O<sub>2</sub>F 297.1285; found 297.1284.

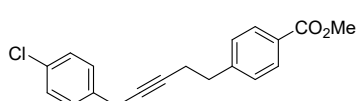

**methyl 4-(5-(4-chlorophenyl)pent-3-yn-1-yl)benzoate (3lb):** A colorless oil, 43.1 mg, 69% yield. Eluent: PE/EA = 10/1. **<sup>1</sup>H NMR** (400 MHz, CDCl<sub>3</sub>) δ 7.96 (d, *J* = 8.2 Hz, 2H), 7.31 – 7.22 (m, 4H), 7.16 (d, *J* = 8.4 Hz, 2H), 3.92 (s, 3H), 3.49 (t, *J* = 2.4 Hz, 2H), 2.88 (t, *J* = 7.3 Hz, 2H), 2.55 (tt, *J* = 7.4, 2.5 Hz, 2H); **<sup>13</sup>C NMR** (151 MHz, CDCl<sub>3</sub>) δ 167.1, 146.1, 135.7, 132.2, 129.7, 129.2, 128.6, 128.5, 128.3, 81.6, 78.4, 52.0, 35.1, 24.5, 20.5; **IR (neat):** ν 2950, 1719, 1610, 1491, 1435, 1280, 1180, 1110, 1016, 820, 765, 705 cm<sup>-1</sup>; **HRMS (EI)** m/z: [M]<sup>+</sup> Calcd. for C<sub>19</sub>H<sub>17</sub>O<sub>2</sub>Cl 312.0912; found 312.0915.

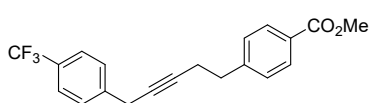

**methyl 4-(5-(4-(trifluoromethyl)phenyl)pent-3-yn-1-yl) benzoate (3mb):** A colorless oil, 50.5 mg, 73% yield. Eluent: PE/EA = 10/1. **<sup>1</sup>H NMR** (400 MHz, CDCl<sub>3</sub>) δ 7.96 (d, *J* = 8.3 Hz, 2H), 7.52 (d, *J* = 8.0 Hz, 2H), 7.31 (dd, *J* = 15.0, 7.9 Hz, 4H), 3.91 (s, 3H), 3.58 (t, *J* = 2.6 Hz, 2H), 2.89 (t, *J* = 7.3 Hz, 2H), 2.56 (tt, *J* = 7.4, 2.5 Hz, 2H); **<sup>13</sup>C NMR** (151 MHz, CDCl<sub>3</sub>) δ 167.0, 146.0, 141.3, 129.7, 128.8 (q, *J* = 32.6 Hz), 128.6, 128.3, 128.1, 125.3 (q, *J* = 4.2 Hz), 124.2 (q, *J* = 272.1 Hz), 82.0, 77.8, 52.0, 35.0, 25.0, 20.5; **<sup>19</sup>F NMR** (565 MHz, CDCl<sub>3</sub>) δ -62.4; **IR (neat):** ν 2990, 2952, 2892, 1718, 1612, 1435, 1417, 1324, 1278, 1162, 1107, 1066, 1019, 817, 767, 704 cm<sup>-1</sup>; **HRMS (ESI)** m/z: [M+H]<sup>+</sup> Calcd. for C<sub>20</sub>H<sub>18</sub>O<sub>2</sub>F<sub>3</sub> 347.1253; found 347.1241.



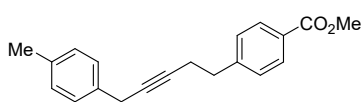

**methyl 4-(5-(p-tolyl)pent-3-yn-1-yl)benzoate (3nb):** A colorless oil,

38.5 mg, 66% yield. Eluent: PE/EA = 10/1. **<sup>1</sup>H NMR** (400 MHz, CDCl<sub>3</sub>) δ 7.97 (d, *J* = 8.0 Hz, 2H), 7.30 (d, *J* = 8.0 Hz, 2H), 7.19 –

7.06 (m, 4H), 3.93 (s, 3H), 3.51 (t, *J* = 2.7 Hz, 2H), 2.90 (t, *J* = 7.4 Hz, 2H), 2.55 (tt, *J* = 7.5, 2.6 Hz, 2H), 2.34 (s, 3H); **<sup>13</sup>C NMR** (151 MHz, CDCl<sub>3</sub>) δ 167.1, 146.2, 135.9, 134.2, 129.7, 129.1, 128.6, 128.2, 127.7, 80.9, 79.2, 52.0, 35.2, 24.6, 21.0, 20.6; **IR (neat):** ν 2942, 2917, 2202, 1719, 1610, 1435, 1280, 1179, 1110, 1020, 765 cm<sup>-1</sup>; **HRMS (ESI) m/z:** [M+H]<sup>+</sup> Calcd. for C<sub>20</sub>H<sub>21</sub>O<sub>2</sub> 293.1536; found 293.1536.

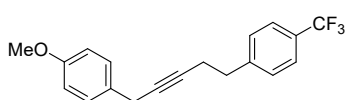

**1-methoxy-4-(5-(4-(trifluoromethyl)phenyl)pent-2-yn-1-yl)benzene (3oa):** A yellow oil, 36.3 mg, 57% yield. Eluent: PE/EA = 10/1. **<sup>1</sup>H**

**NMR** (400 MHz, CDCl<sub>3</sub>) δ 7.54 (d, *J* = 8.0 Hz, 2H), 7.33 (d, *J* = 8.0

Hz, 2H), 7.13 (d, *J* = 8.6 Hz, 2H), 6.84 – 6.80 (m, 2H), 3.79 (s, 3H), 3.47 (t, *J* = 2.5 Hz, 2H), 2.88 (t, *J* = 7.3 Hz, 2H), 2.54 (tt, *J* = 7.3, 2.5 Hz, 2H); **<sup>13</sup>C NMR** (151 MHz, CDCl<sub>3</sub>) δ 158.2, 144.8, 128.9, 128.8, 128.5 (q, *J* = 32.6 Hz), 125.2 (q, *J* = 4.2 Hz), 124.3 (q, *J* = 272.1 Hz), 113.8, 80.8, 79.5, 55.3, 35.0, 24.2, 20.6; **<sup>19</sup>F NMR** (565 MHz, CDCl<sub>3</sub>) δ -62.3; **IR (neat):** ν 2936, 2830, 2188, 1712, 1600, 1510, 1418, 1323, 1246, 1160, 1066, 1018, 827 cm<sup>-1</sup>; **HRMS (EI) m/z:** [M]<sup>+</sup> Calcd. for C<sub>19</sub>H<sub>17</sub>OF<sub>3</sub> 318.1226; found 318.1223.

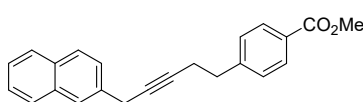

**methyl 4-(5-(naphthalen-2-yl)pent-3-yn-1-yl)benzoate (3pb):** A

yellow oil, 44.0 mg, 67% yield. Eluent: PE/EA = 10/1. **<sup>1</sup>H NMR** (400 MHz, CDCl<sub>3</sub>) δ 7.96 (d, *J* = 8.2 Hz, 2H), 7.85 – 7.73 (m, 3H), 7.70 (s,

1H), 7.50 – 7.40 (m, 2H), 7.35 (d, *J* = 6.5 Hz, 1H), 7.31 (d, *J* = 8.2 Hz, 2H), 3.90 (s, 3H), 3.70 (t, *J* = 2.7 Hz, 2H), 2.91 (t, *J* = 7.3 Hz, 2H), 2.58 (tt, *J* = 7.4, 2.5 Hz, 2H); **<sup>13</sup>C NMR** (151 MHz, CDCl<sub>3</sub>) δ 167.1, 146.2, 134.7, 133.5, 132.2, 129.7, 128.6, 128.2, 128.0, 127.6, 126.5, 126.0, 126.0, 125.4, 81.5, 78.8, 52.0, 35.2, 25.3, 20.6; **IR (neat):** ν 2951, 2912, 1717, 1610, 1508, 1434, 1278, 1179, 1109, 1020, 812, 765 cm<sup>-1</sup>; **HRMS (ESI) m/z:** [M+Na]<sup>+</sup> Calcd. for C<sub>23</sub>H<sub>20</sub>O<sub>2</sub>Na 351.1356; found 351.1353.

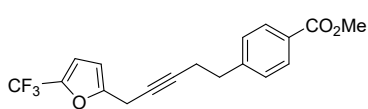

**methyl 4-(5-(5-(trifluoromethyl)furan-2-yl)pent-3-yn-1-yl)**

**benzoate (3qb):** A yellow oil, 35.0 mg, 52% yield. Eluent: PE/EA =

10/1.  $^1\text{H NMR}$  (400 MHz,  $\text{CDCl}_3$ )  $\delta$  7.97 (d,  $J = 8.3$  Hz, 2H), 7.29 (d,  $J = 8.3$  Hz, 2H), 6.69 (d,  $J = 3.3$  Hz, 1H), 6.15 (d,  $J = 3.4$  Hz, 1H), 3.91 (s, 3H), 3.56 (t,  $J = 2.4$  Hz, 2H), 2.88 (t,  $J = 7.3$  Hz, 2H), 2.53 (tt,  $J = 7.3, 2.4$  Hz, 2H);  $^{13}\text{C NMR}$  (151 MHz,  $\text{CDCl}_3$ )  $\delta$  167.1, 154.2, 145.9, 140.8 (q,  $J = 43.0$  Hz), 129.7, 128.5, 128.3, 119.0 (q,  $J = 266.5$  Hz), 112.4 (q,  $J = 3.0$  Hz), 107.1, 81.5, 74.6, 52.0, 34.9, 20.4, 18.8;  $^{19}\text{F NMR}$  (565 MHz,  $\text{CDCl}_3$ )  $\delta$  -64.0; **IR (neat):**  $\nu$  2952, 1720, 1612, 1559, 1436, 1325, 1281, 1179, 1130, 1102, 1019, 963, 801, 767  $\text{cm}^{-1}$ ; **HRMS** (ESI)  $m/z$ :  $[\text{M}+\text{Na}]^+$  Calcd. for  $\text{C}_{18}\text{H}_{15}\text{O}_3\text{F}_3\text{Na}$  359.0866; found 359.0862.

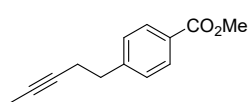

**methyl 4-(pent-3-yn-1-yl)benzoate (3ab):** A colorless oil, 29.9 mg, 74%

yield. Eluent: PE/EA = 10/1.  $^1\text{H NMR}$  (400 MHz,  $\text{CDCl}_3$ )  $\delta$  7.97 (d,  $J = 8.3$

Hz, 2H), 7.28 (d,  $J = 8.2$  Hz, 2H), 3.90 (s, 3H), 2.84 (t,  $J = 7.5$  Hz, 2H), 2.44

(tq,  $J = 7.6, 2.5$  Hz, 2H), 1.76 (t,  $J = 2.5$  Hz, 3H);  $^{13}\text{C NMR}$  (151 MHz,  $\text{CDCl}_3$ )  $\delta$  167.1, 146.3, 129.6, 128.5, 128.1, 78.0, 76.6, 52.0, 35.4, 20.5, 3.4; **IR (neat):**  $\nu$  2945, 2919, 2850, 1718, 1611, 1434, 1325, 1276, 1179, 1109, 1020, 767, 703  $\text{cm}^{-1}$ ; **HRMS** (EI)  $m/z$ :  $[\text{M}]^+$  Calcd. for  $\text{C}_{13}\text{H}_{14}\text{O}_2$  202.0988; found 202.0983.

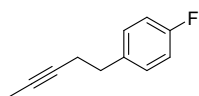

**1-fluoro-4-(pent-3-yn-1-yl)benzene (3ac):** A colorless oil, 20.4 mg, 63% yield.

Eluent: PE.  $^1\text{H NMR}$  (400 MHz,  $\text{CDCl}_3$ )  $\delta$  7.16 (dd,  $J = 8.4, 5.6$  Hz, 2H), 7.02 –

6.92 (m, 2H), 2.76 (t,  $J = 7.5$  Hz, 2H), 2.44 – 2.34 (m, 2H), 1.77 (t,  $J = 2.5$  Hz,

3H);  $^{13}\text{C NMR}$  (151 MHz,  $\text{CDCl}_3$ )  $\delta$  161.5 (d,  $J = 243.5$  Hz), 136.6 (d,  $J = 3.5$  Hz), 129.8 (d,  $J = 8.0$  Hz), 115.0 (d,  $J = 21.4$  Hz), 78.3, 76.4, 34.6, 21.1, 3.4;  $^{19}\text{F NMR}$  (565 MHz,  $\text{CDCl}_3$ )  $\delta$  -117.3; **IR (neat):**  $\nu$  2920, 2855, 1601, 1508, 1433, 1222, 1157, 1094, 1016, 857, 822, 721  $\text{cm}^{-1}$ ; **HRMS** (ESI)  $m/z$ :  $[\text{M}+\text{H}]^+$  Calcd. for  $\text{C}_{11}\text{H}_{12}\text{F}$  163.0918; found 163.0920.

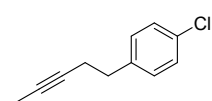

**1-chloro-4-(pent-3-yn-1-yl)benzene (3ad):** A colorless oil, 22.0 mg, 62% yield.

Eluent: PE.  $^1\text{H NMR}$  (400 MHz,  $\text{CDCl}_3$ )  $\delta$  7.26 (d,  $J = 8.4$  Hz, 2H), 7.15 (d,  $J =$

8.4 Hz, 2H), 2.76 (t,  $J = 7.5$  Hz, 2H), 2.40 (tq,  $J = 7.5, 2.5$  Hz, 2H), 1.77 (t,  $J = 2.5$  Hz, 3H);  $^{13}\text{C}$

**NMR** (151 MHz, CDCl<sub>3</sub>)  $\delta$  139.4, 131.9, 129.8, 128.4, 78.1, 76.5, 34.7, 20.8, 3.4; **IR** (*neat*):  $\nu$  2919, 2855, 1492, 1437, 1091, 1015, 810, 747 cm<sup>-1</sup>; **HRMS** (ESI) *m/z*: [M+H]<sup>+</sup> Calcd. for C<sub>11</sub>H<sub>12</sub>Cl 179.0622; found 179.0639.

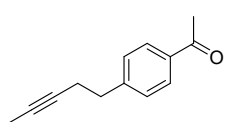

**1-(4-(pent-3-yn-1-yl)phenyl)ethan-1-one (3ae)**: A colorless oil, 30.6 mg, 82% yield. Eluent: PE/EA = 10/1. **<sup>1</sup>H NMR** (400 MHz, CDCl<sub>3</sub>)  $\delta$  7.90 (d, *J* = 8.3 Hz, 2H), 7.31 (d, *J* = 8.3 Hz, 2H), 2.85 (t, *J* = 7.4 Hz, 2H), 2.59 (s, 3H), 2.44 (tq, *J* = 7.5, 2.5 Hz, 2H), 1.76 (t, *J* = 2.5 Hz, 3H); **<sup>13</sup>C NMR** (151 MHz, CDCl<sub>3</sub>)  $\delta$  197.9, 146.6, 135.3, 128.7, 128.5, 77.9, 76.7, 35.3, 26.6, 20.5, 3.4; **IR** (*neat*):  $\nu$  2919, 1682, 1606, 1431, 1411, 1357, 1267, 1182, 956, 820 cm<sup>-1</sup>; **HRMS** (ESI) *m/z*: [M+H]<sup>+</sup> Calcd. for C<sub>13</sub>H<sub>15</sub>O 187.1117; found 187.1104.

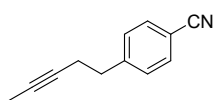

**4-(pent-3-yn-1-yl)benzonitrile (3af)**: A colorless oil, 22.0 mg, 65% yield. Eluent: PE/EA = 10/1. **<sup>1</sup>H NMR** (400 MHz, CDCl<sub>3</sub>)  $\delta$  7.59 (d, *J* = 8.3 Hz, 2H), 7.33 (d, *J* = 8.2 Hz, 2H), 2.84 (t, *J* = 7.3 Hz, 2H), 2.44 (tq, *J* = 7.4, 2.5 Hz, 2H), 1.75 (t, *J* = 2.5 Hz, 3H); **<sup>13</sup>C NMR** (151 MHz, CDCl<sub>3</sub>)  $\delta$  146.4, 132.1, 129.3, 119.0, 110.1, 77.5, 77.0, 35.3, 20.3, 3.4; **IR** (*neat*):  $\nu$  2918, 2856, 2227, 1608, 1505, 1434, 1416, 1117, 1108, 1021, 856, 822 cm<sup>-1</sup>; **HRMS** (EI) *m/z*: [M]<sup>+</sup> Calcd. for C<sub>12</sub>H<sub>11</sub>N 169.0886; found 169.0881.

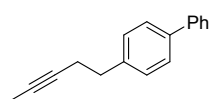

**4-(pent-3-yn-1-yl)-1,1'-biphenyl (3ag)**: A colorless oil, 30.8 mg, 70% yield. Eluent: PE. **<sup>1</sup>H NMR** (400 MHz, CDCl<sub>3</sub>)  $\delta$  7.61 – 7.56 (m, 2H), 7.53 (d, *J* = 8.2 Hz, 2H), 7.46 – 7.40 (m, 2H), 7.37 – 7.27 (m, 3H), 2.85 (t, *J* = 7.6 Hz, 2H), 2.47 (tq, *J* = 7.6, 2.6 Hz, 2H), 1.80 (t, *J* = 2.5 Hz, 3H); **<sup>13</sup>C NMR** (151 MHz, CDCl<sub>3</sub>)  $\delta$  141.0, 140.1, 139.1, 128.8, 128.7, 127.1, 127.04, 127.00, 78.5, 76.3, 35.1, 29.7, 20.9, 3.5; **IR** (*neat*):  $\nu$  2918, 2852, 1486, 1449, 1075, 1008, 824, 761 cm<sup>-1</sup>; **HRMS** (ESI) *m/z*: [M+H]<sup>+</sup> Calcd. for C<sub>17</sub>H<sub>17</sub> 221.1325; found 221.1226.

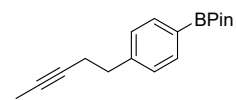

**4,4,5,5-tetramethyl-2-(4-(pent-3-yn-1-yl)phenyl)-1,3,2-dioxaborolane (3ah)**: A colorless oil, 29.2 mg, 54% yield. Eluent: PE/EA = 10/1. Containing a trace

amount of impurity that failed to be separated. **<sup>1</sup>H NMR** (400 MHz, CDCl<sub>3</sub>) δ 7.75 (d, *J* = 7.9 Hz, 2H), 7.23 (d, *J* = 7.9 Hz, 2H), 2.81 (t, *J* = 7.6 Hz, 2H), 2.41 (tq, *J* = 7.6, 2.6 Hz, 2H), 1.77 (t, *J* = 2.6 Hz, 3H), 1.34 (s, 12H); **<sup>13</sup>C NMR** (151 MHz, CDCl<sub>3</sub>) δ 144.3, 134.8, 127.9, 83.6, 78.4, 76.2, 35.7, 24.8, 20.8, 3.4; **IR (neat)**: ν 2982, 2909, 1714, 1611, 1397, 1357, 1270, 1217, 1143, 1088, 1021, 858, 822 cm<sup>-1</sup>; **HRMS** (ESI) *m/z*: [M+H]<sup>+</sup> Calcd. for C<sub>17</sub>H<sub>24</sub>O<sub>2</sub>B 271.1864; found 271.1884.

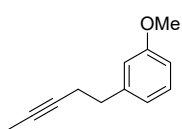

**1-methoxy-3-(pent-3-yn-1-yl)benzene (3ai)**: A colorless oil, 19.1 mg, 55% yield.

Eluent: PE/EA = 10/1. **<sup>1</sup>H NMR** (400 MHz, CDCl<sub>3</sub>) δ 7.21 (t, *J* = 7.7 Hz, 1H), 6.85 – 6.70 (m, 3H), 3.80 (s, 3H), 2.78 (t, *J* = 7.7 Hz, 2H), 2.46 – 2.37 (m, 2H), 1.78 (t, *J* = 2.5 Hz, 3H); **<sup>13</sup>C NMR** (151 MHz, CDCl<sub>3</sub>) δ 159.6, 142.6, 129.3, 120.8, 114.2, 111.5, 78.6, 76.2, 55.1, 35.6, 20.9, 3.5; **IR (neat)**: ν 2919, 2855, 1601, 1584, 1491, 1453, 1436, 1260, 1153, 1053, 775, 694 cm<sup>-1</sup>; **HRMS** (ESI) *m/z*: [M+H]<sup>+</sup> Calcd. for C<sub>12</sub>H<sub>15</sub>O 175.1117; found 175.1116.

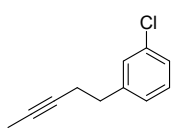

**1-chloro-3-(pent-3-yn-1-yl)benzene (3aj)**: A colorless oil, 18.2 mg, 51% yield.

Eluent: PE. **<sup>1</sup>H NMR** (400 MHz, CDCl<sub>3</sub>) δ 7.25 – 7.16 (m, 3H), 7.09 (d, *J* = 7.1 Hz, 1H), 2.77 (t, *J* = 7.5 Hz, 2H), 2.41 (tq, *J* = 7.5, 2.5 Hz, 2H), 1.78 (t, *J* = 2.5 Hz, 3H); **<sup>13</sup>C NMR** (151 MHz, CDCl<sub>3</sub>) δ 142.9, 134.0, 129.5, 128.6, 126.6, 126.3, 78.0, 76.6, 35.1, 20.7, 3.4; **IR (neat)**: ν 2918, 2856, 1715, 1599, 1573, 1478, 1429, 1093, 1078, 868, 779, 688 cm<sup>-1</sup>; **HRMS** (ESI) *m/z*: [M+H]<sup>+</sup> Calcd. for C<sub>11</sub>H<sub>12</sub>Cl 179.0622; found 179.0624.

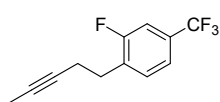

**2-fluoro-1-(pent-3-yn-1-yl)-4-(trifluoromethyl)benzene (3ak)**: A colorless oil,

35.6 mg, 77% yield. Eluent: PE. **<sup>1</sup>H NMR** (400 MHz, CDCl<sub>3</sub>) δ 7.42 – 7.31 (m, 2H), 7.28 (d, *J* = 9.8 Hz, 1H), 2.87 (t, *J* = 7.3 Hz, 2H), 2.45 (tq, *J* = 7.5, 2.6 Hz, 2H), 1.75 (t, *J* = 2.6 Hz, 3H); **<sup>13</sup>C NMR** (151 MHz, CDCl<sub>3</sub>) δ 160.7 (d, *J* = 247.6 Hz), 131.9 (d, *J* = 16.2 Hz), 131.4 (d, *J* = 5.6 Hz), 130.3 (qd, *J* = 33.4, 8.2 Hz), 123.4 (qd, *J* = 271.9, 3.5 Hz), 120.8 (q, *J* = 4.4 Hz), 112.6 (dq, *J* = 25.9, 4.2 Hz), 77.5, 76.9, 28.6, 19.2, 3.4; **<sup>19</sup>F NMR** (565 MHz, CDCl<sub>3</sub>) δ -62.6, -116.5; **IR (neat)**: ν 2914, 2856, 1585, 1507, 1427, 1327, 1273, 1219, 1167, 1126, 1115, 1065, 912, 878, 824, 744 cm<sup>-1</sup>; **HRMS** (EI) *m/z*: [M]<sup>+</sup> Calcd. for C<sub>12</sub>H<sub>10</sub>F<sub>4</sub> 230.0713; found 230.0712.

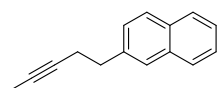

**2-(pent-3-yn-1-yl)naphthalene (3al):** A colorless oil, 25.6 mg, 66% yield.

Eluent: PE.  $^1\text{H NMR}$  (400 MHz,  $\text{CDCl}_3$ )  $\delta$  7.84 – 7.75 (m, 3H), 7.66 (s, 1H), 7.50 – 7.39 (m, 2H), 7.36 (dd,  $J = 8.4, 1.8$  Hz, 1H), 2.96 (t,  $J = 7.6$  Hz, 2H), 2.51 (tq,  $J = 7.6, 2.6$  Hz, 2H), 1.78 (t,  $J = 2.6$  Hz, 3H);  $^{13}\text{C NMR}$  (151 MHz,  $\text{CDCl}_3$ )  $\delta$  138.5, 133.5, 132.1, 127.8, 127.6, 127.5, 127.2, 126.6, 125.9, 125.2, 78.5, 76.3, 35.7, 20.9, 3.5; **IR (neat):**  $\nu$  2920, 2853, 1508, 1453, 1376, 1260, 1018, 852, 814, 742  $\text{cm}^{-1}$ ; **HRMS (DART)**  $m/z$ :  $[\text{M}+\text{H}]^+$  Calcd. for  $\text{C}_{15}\text{H}_{15}$  195.1168; found 195.1168.

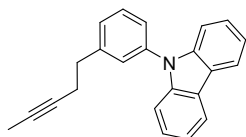

**9-(3-(pent-3-yn-1-yl)phenyl)-9H-carbazole (3am):** A yellow oil, 41.4 mg, 67%

yield. Eluent: PE/EA = 10/1.  $^1\text{H NMR}$  (400 MHz,  $\text{CDCl}_3$ )  $\delta$  8.14 (d,  $J = 7.8$  Hz, 2H), 7.51 (t,  $J = 7.7$  Hz, 1H), 7.46 – 7.36 (m, 6H), 7.32 – 7.23 (m, 3H), 2.89 (t,  $J = 7.3$  Hz, 2H), 2.51 (tq,  $J = 7.4, 2.5$  Hz, 2H), 1.78 (t,  $J = 2.5$  Hz, 3H);  $^{13}\text{C NMR}$  (151 MHz,  $\text{CDCl}_3$ )  $\delta$  143.0, 140.9, 137.6, 129.7, 127.5, 127.2, 125.9, 124.8, 123.3, 120.2, 119.8, 109.8, 78.2, 76.7, 35.2, 20.8, 3.5; **IR (neat):**  $\nu$  3046, 2916, 2856, 1595, 1494, 1450, 1362, 1315, 1229, 1157, 791, 747, 724  $\text{cm}^{-1}$ ; **HRMS (ESI)**  $m/z$ :  $[\text{M}+\text{H}]^+$  Calcd. for  $\text{C}_{23}\text{H}_{20}\text{N}$  310.1590; found 310.1593.

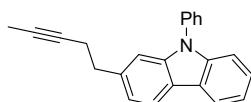

**2-(pent-3-yn-1-yl)-9-phenyl-9H-carbazole (3an):** A colorless oil, 32.0 mg,

52% yield. Eluent: PE/EA = 10/1.  $^1\text{H NMR}$  (400 MHz,  $\text{CDCl}_3$ )  $\delta$  8.11 (d,  $J = 7.7$  Hz, 1H), 8.05 (d,  $J = 7.9$  Hz, 1H), 7.65 – 7.59 (m, 2H), 7.59 – 7.55 (m, 2H), 7.51 – 7.45 (m, 1H), 7.41 – 7.37 (m, 2H), 7.30 – 7.24 (m, 2H), 7.15 (d,  $J = 8.0$  Hz, 1H), 2.92 (t,  $J = 7.6$  Hz, 2H), 2.46 (tq,  $J = 7.6, 2.6$  Hz, 2H), 1.75 (t,  $J = 2.6$  Hz, 3H);  $^{13}\text{C NMR}$  (151 MHz,  $\text{CDCl}_3$ )  $\delta$  141.1, 141.0, 139.4, 137.8, 129.8, 127.4, 127.1, 125.5, 123.3, 121.7, 120.7, 120.1, 120.0, 119.8, 109.7, 109.5, 78.7, 76.2, 36.1, 21.5, 3.4; **IR (neat):**  $\nu$  2916, 2852, 1745, 1628, 1597, 1474, 1435, 1362, 1232, 1187, 1130, 811, 744  $\text{cm}^{-1}$ ; **HRMS (ESI)**  $m/z$ :  $[\text{M}+\text{H}]^+$  Calcd. for  $\text{C}_{23}\text{H}_{20}\text{N}$  310.1590; found 310.1595.

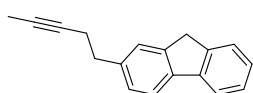

**2-(pent-3-yn-1-yl)-9H-fluorene (3ao):** A colorless oil, 30.2 mg, 65% yield.

Eluent: PE.  $^1\text{H NMR}$  (400 MHz,  $\text{CDCl}_3$ )  $\delta$  7.78 – 7.67 (m, 2H), 7.52 (d,  $J = 7.4$  Hz, 1H), 7.43 – 7.31 (m, 2H), 7.30 – 7.25 (m, 1H), 7.22 (dd,  $J = 7.9, 1.6$  Hz, 1H), 3.87 (s, 2H), 2.87 (t,  $J = 7.7$  Hz, 2H), 2.46 (tq,  $J = 7.5, 2.5$  Hz, 2H), 1.78 (t,  $J = 2.5$  Hz, 3H);  $^{13}\text{C NMR}$  (151 MHz,  $\text{CDCl}_3$ )  $\delta$  143.5, 143.1, 141.6, 139.9, 139.7, 127.0, 126.7, 126.3, 125.1, 124.9, 119.65, 119.63, 78.6, 76.2, 36.8, 35.7, 21.2, 3.5; **IR (EtOH):**  $\nu$  3013, 2917, 2855, 1706, 1466, 1426, 1397, 1364, 1229, 1096, 825, 768, 731  $\text{cm}^{-1}$ ; **HRMS (DART)**  $m/z$ :  $[\text{M}+\text{H}]^+$  Calcd. for  $\text{C}_{18}\text{H}_{17}$  233.1325; found 233.1325.

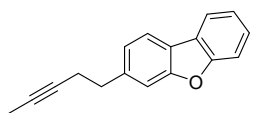

**3-(pent-3-yn-1-yl)dibenzo[b,d]furan (3ap):** A yellow oil, 26.8 mg, 57%

yield. Eluent: PE/EA = 10/1.  $^1\text{H NMR}$  (400 MHz,  $\text{CDCl}_3$ )  $\delta$  7.92 (d,  $J = 7.7$  Hz, 1H), 7.86 (d,  $J = 7.9$  Hz, 1H), 7.56 (d,  $J = 8.2$  Hz, 1H), 7.47 – 7.38 (m, 2H), 7.33 (td,  $J = 7.5, 1.1$  Hz, 1H), 7.21 (dd,  $J = 7.9, 1.4$  Hz, 1H), 2.97 (t,  $J = 7.5$  Hz, 2H), 2.51 (tq,  $J = 7.6, 2.5$  Hz, 2H), 1.79 (t,  $J = 2.5$  Hz, 3H);  $^{13}\text{C NMR}$  (151 MHz,  $\text{CDCl}_3$ )  $\delta$  156.5, 156.3, 140.8, 126.7, 124.2, 123.3, 122.6, 122.4, 120.4, 120.3, 111.5, 111.4, 78.3, 76.5, 35.8, 21.2, 3.5; **IR (neat):**  $\nu$  3055, 2917, 2856, 1603, 1581, 1457, 1425, 1325, 1202, 1124, 1104, 1016, 847, 765, 724  $\text{cm}^{-1}$ ; **HRMS (EI)**  $m/z$ :  $[\text{M}]^+$  Calcd. for  $\text{C}_{17}\text{H}_{14}\text{O}$  234.1039; found 234.1032.

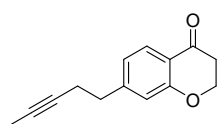

**7-(pent-3-yn-1-yl)chroman-4-one (3aq):** A colorless oil, 33.5 mg, 78% yield.

Eluent: PE/EA = 10/1.  $^1\text{H NMR}$  (400 MHz,  $\text{CDCl}_3$ )  $\delta$  7.82 (d,  $J = 8.0$  Hz, 1H), 6.88 (dd,  $J = 8.1, 1.6$  Hz, 1H), 6.83 (s, 1H), 4.52 (t,  $J = 6.4$  Hz, 2H), 2.82 – 2.74 (m, 4H), 2.43 (tq,  $J = 7.5, 2.5$  Hz, 2H), 1.77 (t,  $J = 2.5$  Hz, 3H);  $^{13}\text{C NMR}$  (151 MHz,  $\text{CDCl}_3$ )  $\delta$  191.5, 161.8, 150.1, 127.1, 122.0, 119.6, 117.3, 77.8, 76.7, 67.0, 37.7, 35.5, 20.1, 3.4; **IR (neat):**  $\nu$  2951, 2920, 2861, 1686, 1615, 1432, 1326, 1254, 1152, 1039, 851, 763  $\text{cm}^{-1}$ ; **HRMS (DART)**  $m/z$ :  $[\text{M}+\text{H}]^+$  Calcd. for  $\text{C}_{14}\text{H}_{15}\text{O}_2$  215.1067; found 215.1066.

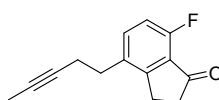

**7-fluoro-4-(pent-3-yn-1-yl)-2,3-dihydro-1H-inden-1-one (3ar):** A colorless oil,

22.9 mg, 53% yield. Eluent: PE/EA = 10/1.  $^1\text{H NMR}$  (400 MHz,  $\text{CDCl}_3$ )  $\delta$  7.46 – 7.38 (m, 1H), 6.99 – 6.91 (m, 1H), 3.14 – 3.06 (m, 2H), 2.82 (t,  $J = 7.3$  Hz, 2H), 2.76 – 2.69 (m,

2H), 2.45 (tq,  $J = 7.4, 2.6$  Hz, 2H), 1.75 (t,  $J = 2.5$  Hz, 3H);  $^{13}\text{C}$  NMR (151 MHz,  $\text{CDCl}_3$ )  $\delta$  203.5, 157.8 (d,  $J = 261.5$  Hz), 155.4 (d,  $J = 2.8$  Hz), 136.1 (d,  $J = 8.4$  Hz), 134.3 (d,  $J = 4.7$  Hz), 124.5 (d,  $J = 13.1$  Hz), 114.3 (d,  $J = 19.7$  Hz), 77.7, 76.9, 36.7, 36.6, 30.6, 24.6, 19.5, 3.4;  $^{19}\text{F}$  NMR (565 MHz,  $\text{CDCl}_3$ )  $\delta$  -119.1; **IR (neat)**:  $\nu$  2922, 1717, 1609, 1489, 1443, 1245, 970, 829  $\text{cm}^{-1}$ ; **HRMS (DART)**  $m/z$ :  $[\text{M}+\text{H}]^+$  Calcd. for  $\text{C}_{14}\text{H}_{14}\text{OF}$  217.1023; found 217.1022.

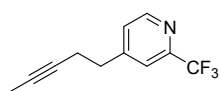

**4-(pent-3-yn-1-yl)-2-(trifluoromethyl)pyridine (3as)**: A colorless oil, 34.6 mg,

81% yield. Eluent: PE/EA = 10/1.  $^1\text{H}$  NMR (400 MHz,  $\text{CDCl}_3$ )  $\delta$  8.64 (d,  $J = 5.0$  Hz, 1H), 7.58 (s, 1H), 7.37 (d,  $J = 4.0$  Hz, 1H), 2.87 (t,  $J = 7.1$  Hz, 2H), 2.49 (tq,  $J = 7.2, 2.5$  Hz, 2H), 1.75 (t,  $J = 2.5$  Hz, 3H);  $^{13}\text{C}$  NMR (151 MHz,  $\text{CDCl}_3$ )  $\delta$  151.7, 149.8, 148.1 (d,  $J = 34.1$  Hz), 126.5, 121.6 (q,  $J = 274.2$  Hz), 120.8 (q,  $J = 3.3$  Hz), 77.8 (another peak of alkyne carbon coincides with the solvent peak), 34.4, 19.6, 3.3;  $^{19}\text{F}$  NMR (565 MHz,  $\text{CDCl}_3$ )  $\delta$  -68.0;  $^{19}\text{F}$  NMR (565 MHz,  $\text{CDCl}_3$ )  $\delta$  -119.1; **IR (neat)**:  $\nu$  2922, 1716, 1610, 1566, 1432, 1330, 1179, 1137, 1086, 996, 848, 749  $\text{cm}^{-1}$ ; **HRMS (EI)**  $m/z$ :  $[\text{M}]^+$  Calcd. for  $\text{C}_{11}\text{H}_{10}\text{F}_3\text{N}$  213.0760; found 213.0758.

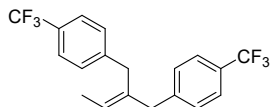

**4,4'-(2-ethylidenepropane-1,3-diyl)bis((trifluoromethyl)benzene) (4aa)**: A

colorless oil, 38.7 mg, 72% yield. Eluent: PE.  $^1\text{H}$  NMR (400 MHz,  $\text{CDCl}_3$ )  $\delta$  7.55 – 7.50 (m, 4H), 7.20 (t,  $J = 7.5$  Hz, 4H), 5.56 (q,  $J = 6.8$  Hz, 1H), 3.35 (s, 2H), 3.25 (s, 2H), 1.79 (d,  $J = 6.7$  Hz, 3H);  $^{13}\text{C}$  NMR (151 MHz,  $\text{CDCl}_3$ )  $\delta$  143.9, 143.8, 136.5, 129.3, 128.8, 128.52 (q,  $J = 32.3$  Hz), 128.47 (q,  $J = 32.3$  Hz), 125.3 (q,  $J = 4.0$  Hz), 125.2 (q,  $J = 4.1$  Hz), 124.3 (q,  $J = 272.1$  Hz), 124.1, 42.9, 34.9, 13.8;  $^{19}\text{F}$  NMR (565 MHz,  $\text{CDCl}_3$ )  $\delta$  -62.3; **IR (neat)**:  $\nu$  2919, 2864, 1623, 1362, 1317, 1226, 1161, 1106, 1065, 1017, 822  $\text{cm}^{-1}$ ; **HRMS (EI)**  $m/z$ :  $[\text{M}]^+$  Calcd. for  $\text{C}_{19}\text{H}_{19}\text{F}_6$  358.1151; found 358.1166.

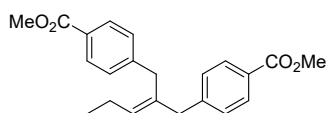

**dimethyl 4,4'-(2-propylidenepropane-1,3-diyl)dibenzoate (4bb)**: A

colorless oil, 37.0 mg, 70% yield. Eluent: PE/EA = 10/1.  $^1\text{H}$  NMR (400 MHz,  $\text{CDCl}_3$ )  $\delta$  7.97 – 7.93 (m, 4H), 7.19 – 7.13 (m, 4H), 5.45 (t,  $J = 7.1$  Hz, 1H), 3.911 (s, 6H), 3.908 (s, 3H), 3.32 (s, 2H), 3.22 (s, 2H), 2.24 – 2.14 (m, 2H), 1.04 (t,  $J = 7.5$  Hz, 3H);  $^{13}\text{C}$  NMR (151 MHz,  $\text{CDCl}_3$ )  $\delta$  167.10, 167.06, 145.4, 145.3, 135.0, 131.8, 129.7, 129.6,

129.0, 128.6, 128.1, 128.0, 51.98, 51.97, 43.0, 35.3, 21.5, 14.4; **IR (neat)**:  $\nu$  2953, 1716, 1608, 1434, 1273, 1176, 1101, 1019, 860, 761, 709  $\text{cm}^{-1}$ ; **HRMS (ESI) m/z**:  $[\text{M}+\text{H}]^+$  Calcd. for  $\text{C}_{22}\text{H}_{25}\text{O}_4$  353.1747; found 353.1741.

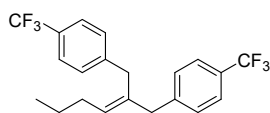

**4,4'-(2-butylidenepropane-1,3-diyl)bis((trifluoromethyl)benzene) (4ca):**

A colorless oil, 39.4 mg, 68% yield. Eluent: PE. Containing a trace amount of impurity that failed to be separated.  **$^1\text{H NMR}$**  (400 MHz,  $\text{CDCl}_3$ )  $\delta$  7.55 – 7.49 (m, 4H), 7.23 – 7.17 (m, 4H), 5.50 (t,  $J = 7.2$  Hz, 1H), 3.33 (s, 2H), 3.24 (s, 2H), 2.17 (q,  $J = 7.3$  Hz, 2H), 1.53 – 1.42 (m, 2H), 0.96 (t,  $J = 7.4$  Hz, 3H);  **$^{13}\text{C NMR}$**  (151 MHz,  $\text{CDCl}_3$ )  $\delta$  144.0, 143.8, 135.5, 130.5, 129.2, 128.8, 128.51 (q,  $J = 32.6$  Hz), 128.47 (q,  $J = 32.6$  Hz), 125.3 (q,  $J = 4.0$  Hz), 125.2 (d,  $J = 4.0$  Hz), 124.3 (q,  $J = 272.1$  Hz), 42.9, 35.2, 30.3, 23.0, 13.9;  **$^{19}\text{F NMR}$**  (565 MHz,  $\text{CDCl}_3$ )  $\delta$  -62.3; **IR (neat)**:  $\nu$  2962, 2931, 2872, 1617, 1417, 1322, 1162, 1121, 1108, 1066, 1018, 849, 821  $\text{cm}^{-1}$ ; **HRMS (EI) m/z**:  $[\text{M}]^+$  Calcd. for  $\text{C}_{21}\text{H}_{20}\text{F}_6$  386.1464; found 386.1465.

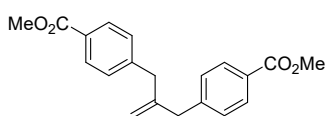

**dimethyl 4,4'-(2-methylenepropane-1,3-diyl)dibenzoate (4db):**

A colorless oil, 31.6 mg, 65% yield. Eluent: PE/EA = 10/1.  **$^1\text{H NMR}$**  (400 MHz,  $\text{CDCl}_3$ )  $\delta$  7.97 (d,  $J = 8.0$  Hz, 4H), 7.20 (d,  $J = 8.0$  Hz, 4H), 4.89 (s, 2H), 3.91 (s, 6H), 3.31 (s, 4H);  **$^{13}\text{C NMR}$**  (151 MHz,  $\text{CDCl}_3$ )  $\delta$  167.1, 146.6, 144.6, 129.7, 129.1, 128.3, 114.7, 52.0, 42.2; **IR (neat)**:  $\nu$  2948, 2926, 1716, 1609, 1434, 1273, 1177, 1101, 1019, 901, 762, 708  $\text{cm}^{-1}$ ; **HRMS (ESI) m/z**:  $[\text{M}+\text{Na}]^+$  Calcd. for  $\text{C}_{20}\text{H}_{20}\text{O}_6\text{Na}$  347.1254; found 347.1259.

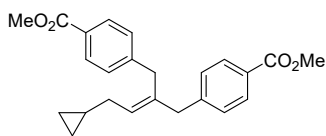

**dimethyl 4,4'-(2-(2-cyclopropylethylidene)propane-1,3-diyl)**

**dibenzoate (4eb):** A colorless oil, 40.0 mg, 70% yield. Eluent: PE/EA = 10/1.  **$^1\text{H NMR}$**  (400 MHz,  $\text{CDCl}_3$ )  $\delta$  7.95 (d,  $J = 8.2$  Hz, 4H), 7.17 (d,  $J = 7.9$  Hz, 4H), 5.58 (t,  $J = 7.2$  Hz, 1H), 3.91 (s, 6H), 3.31 (s, 2H), 3.24 (s, 2H), 2.11 (t,  $J = 7.0$  Hz, 2H), 0.85 – 0.73 (m, 1H), 0.50 – 0.44 (m, 2H), 0.13 – 0.07 (m, 2H);  **$^{13}\text{C NMR}$**  (151 MHz,  $\text{CDCl}_3$ )  $\delta$  167.12, 167.06, 145.4, 145.2, 135.6, 129.7, 129.6, 129.3, 129.0, 128.6, 128.12, 128.07, 52.0, 43.1, 35.4, 32.9, 11.0, 4.2; **IR (neat)**:  $\nu$  3000, 2951, 1719, 1609, 1435, 1277, 1177, 1107, 1019, 966, 861, 762  $\text{cm}^{-1}$ ; **HRMS (DART) m/z**:  $[\text{M}+\text{H}]^+$  Calcd. for  $\text{C}_{24}\text{H}_{27}\text{O}_4$  379.1904; found 379.1917.



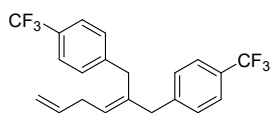

**4,4'-(2-(but-3-en-1-ylidene)propane-1,3-**

**diyl)bis((trifluoromethyl)benzene) (4ha):** A colorless oil, 27.1 mg, 47%

yield. Eluent: PE. <sup>1</sup>H NMR (400 MHz, CDCl<sub>3</sub>) δ 7.52 (dd, *J* = 8.3, 3.1 Hz,

4H), 7.20 (dd, *J* = 8.3, 3.1 Hz, 4H), 5.87 (ddt, *J* = 16.5, 10.2, 6.1 Hz, 1H), 5.52 (t, *J* = 7.4 Hz, 1H),

5.14 – 5.01 (m, 2H), 3.35 (s, 2H), 3.27 (s, 2H), 2.99 – 2.92 (m, 2H); <sup>13</sup>C NMR (151 MHz, CDCl<sub>3</sub>) δ

143.7, 143.4, 136.8, 136.4, 129.3, 128.9, 128.61 (q, *J* = 31.9 Hz), 128.58 (q, *J* = 31.9 Hz), 127.1,

125.4 (q, *J* = 4.0 Hz), 125.2 (q, *J* = 4.0 Hz), 115.2, 42.8, 35.2, 32.4; <sup>19</sup>F NMR (565 MHz, CDCl<sub>3</sub>) δ

-62.36, -62.37; **IR (neat):** ν 2959, 2924, 2856, 1636, 1617, 1322, 1161, 1120, 1107, 1066, 820 cm<sup>-1</sup>;

**HRMS (EI) m/z:** [M]<sup>+</sup> Calcd. for C<sub>21</sub>H<sub>18</sub>F<sub>6</sub> 384.1307; found 384.1308.

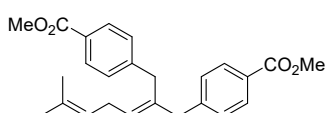

**dimethyl 4,4'-(2-(4-methylpent-3-en-1-ylidene)propane -1,3-**

**diyl)dibenzoate (4ib):** A yellow oil, 40.1 mg, 68% yield. Eluent: PE/EA

= 10/1. <sup>1</sup>H NMR (400 MHz, CDCl<sub>3</sub>) δ 7.97 – 7.93 (m, 4H), 7.20 – 7.14

(m, 4H), 5.44 (t, *J* = 7.3 Hz, 1H), 5.18 – 5.11 (m, 1H), 3.913 (s, 3H), 3.908 (s, 3H), 3.34 (s, 2H),

3.22 (s, 2H), 2.87 (t, *J* = 7.3 Hz, 2H), 1.72 (s, 3H), 1.62 (s, 3H); **C NMR** (151 MHz, CDCl<sub>3</sub>) δ

167.11, 167.08, 145.3, 145.2, 135.5, 132.3, 129.8, 129.6, 129.1, 128.8, 128.6, 128.13, 128.09, 122.3,

52.01, 52.99, 43.0, 35.4, 27.3, 25.7, 17.8; **IR (neat):** ν 2951, 2914, 2853, 1719, 1609, 1435, 1278,

1178, 1109, 1020, 763 cm<sup>-1</sup>; **HRMS (ESI) m/z:** [M+Na]<sup>+</sup> Calcd. for C<sub>25</sub>H<sub>28</sub>O<sub>4</sub>Na 415.1880; found

415.1874.

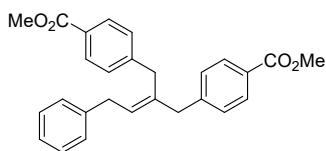

**dimethyl 4,4'-(2-(2-phenylethylidene)propane-1,3-diyl) dibenzoate**

**(4jb):** A colorless oil, 40.4 mg, 65% yield. Eluent: PE/EA = 10/1. <sup>1</sup>H

**NMR** (400 MHz, CDCl<sub>3</sub>) δ 7.98 – 7.93 (m, 4H), 7.36 – 7.28 (m, 2H),

7.24 – 7.15 (m, 7H), 5.69 (t, *J* = 7.2 Hz, 1H), 3.92 (s, 3H), 3.91 (s, 3H), 3.55 (d, *J* = 7.4 Hz, 2H),

3.44 (s, 2H), 3.29 (s, 2H); <sup>13</sup>C NMR (151 MHz, CDCl<sub>3</sub>) δ 167.1, 167.0, 145.1, 144.8, 140.6, 136.8,

129.8, 129.7, 129.1, 128.7, 128.6, 128.4, 128.3, 128.24, 128.22, 126.1, 52.03, 52.01, 43.1, 35.5,

34.4; **IR (neat):** ν 3024, 2951, 1719, 1608, 1434, 1277, 1177, 1103, 1019, 763, 698 cm<sup>-1</sup>; **HRMS**

**(ESI) m/z:** [M+Na]<sup>+</sup> Calcd. for C<sub>27</sub>H<sub>26</sub>O<sub>4</sub>Na 437.1723; found 437.1722.

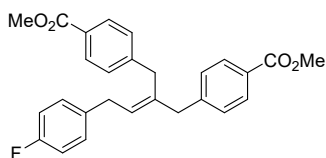

**dimethyl 4,4'-(2-(2-(4-fluorophenyl)ethylidene)propane -1,3-**

**diyl)dibenzoate (4kb):** A colorless oil, 40.8 mg, 63% yield. Eluent:

PE/EA = 10/1. **<sup>1</sup>H NMR** (400 MHz, CDCl<sub>3</sub>) δ 8.00 – 7.92 (m, 4H), 7.21

– 7.10 (m, 6H), 7.03 – 6.96 (m, 2H), 5.64 (t, *J* = 7.4 Hz, 1H), 3.92 (s, 3H), 3.91 (s, 3H), 3.51 (d, *J* = 7.3 Hz, 2H), 3.43 (s, 2H), 3.29 (s, 2H); **<sup>13</sup>C NMR** (151 MHz, CDCl<sub>3</sub>) δ 167.04, 167.00, 161.4 (d, *J* = 244.1 Hz), 145.0, 144.7, 137.1, 136.2 (d, *J* = 3.5 Hz), 129.9, 129.7, 129.6 (d, *J* = 7.9 Hz), 129.0, 128.6, 128.3, 128.2, 115.3 (d, *J* = 21.1 Hz), 52.1, 52.0, 43.1, 35.5, 33.6; **<sup>19</sup>F NMR** (565 MHz, CDCl<sub>3</sub>) δ -117.2; **IR (neat):** ν 2985, 2952, 1716, 1608, 1507, 1435, 1278, 1221, 1108, 1020, 764, 712 cm<sup>-1</sup>; **HRMS** (ESI) *m/z*: [M+Na]<sup>+</sup> Calcd. for C<sub>27</sub>H<sub>25</sub>O<sub>4</sub>FNa 455.1629; found 455.1635.

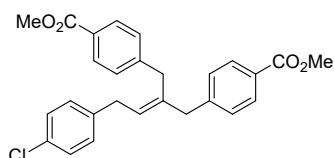

**dimethyl 4,4'-(2-(2-(4-chlorophenyl)ethylidene)propane -1,3-**

**diyl)dibenzoate (4lb):** A colorless oil, 40.3 mg, 60% yield. Eluent:

PE/EA = 10/1. **<sup>1</sup>H NMR** (400 MHz, CDCl<sub>3</sub>) δ 8.00 – 7.92 (m, 4H), 7.31

– 7.24 (m, 3H), 7.19 – 7.14 (m, 4H), 7.11 (d, *J* = 8.4 Hz, 2H), 5.62 (t, *J* = 7.4 Hz, 1H), 3.92 (s, 3H), 3.91 (s, 3H), 3.50 (d, *J* = 7.4 Hz, 2H), 3.43 (s, 2H), 3.29 (s, 2H); **<sup>13</sup>C NMR** (151 MHz, CDCl<sub>3</sub>) δ 167.03, 166.99, 144.9, 144.6, 139.0, 137.4, 131.9, 129.9, 129.7, 129.6, 129.0, 128.7, 128.6, 128.3, 127.8, 52.1, 52.0, 43.1, 35.5, 33.7; **IR (neat):** ν 2950, 2898, 2847, 1717, 1608, 1434, 1276, 1177, 1102, 1018, 763, 710 cm<sup>-1</sup>; **HRMS** (ESI) *m/z*: [M+Na]<sup>+</sup> Calcd. for C<sub>27</sub>H<sub>25</sub>O<sub>4</sub>NaCl 471.1334; found 471.1342.

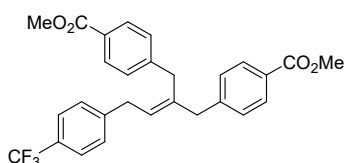

**dimethyl 4,4'-(2-(2-(4-(trifluoromethyl)phenyl)ethylidene)propane-1,3-diyl)dibenzoate (4mb):**

A colorless oil, 40.5 mg, 56% yield. Eluent: PE/EA = 10/1. **<sup>1</sup>H NMR** (400 MHz, CDCl<sub>3</sub>) δ 8.00 –

7.93 (m, 4H), 7.56 (d, *J* = 8.0 Hz, 2H), 7.30 (d, *J* = 8.0 Hz, 2H), 7.21 – 7.14 (m, 4H), 5.64 (t, *J* = 7.4 Hz, 1H), 3.92 (s, 3H), 3.91 (s, 3H), 3.59 (d, *J* = 7.4 Hz, 2H), 3.45 (s, 2H), 3.31 (s, 2H); **<sup>13</sup>C NMR** (151 MHz, CDCl<sub>3</sub>) δ 167.02, 166.97, 144.8, 144.5, 137.9, 129.9, 129.8, 129.1, 128.60, 128.59, 128.4, 128.3 (q, *J* = 32.6 Hz), 127.1, 125.5 (q, *J* = 4.0 Hz), 124.3 (q, *J* = 271.8 Hz), 52.1, 52.0, 43.1, 35.6, 34.2; **<sup>19</sup>F NMR** (565 MHz, CDCl<sub>3</sub>) δ -62.3; **IR (neat):** ν 2945, 2912, 2850, 1718, 1609, 1435, 1323, 1276, 1177, 1106, 1018, 826, 763, 710 cm<sup>-1</sup>; **HRMS** (ESI)

m/z: [M+Na]<sup>+</sup> Calcd. for C<sub>28</sub>H<sub>25</sub>O<sub>4</sub>F<sub>3</sub>Na 505.1597; found 505.1603.

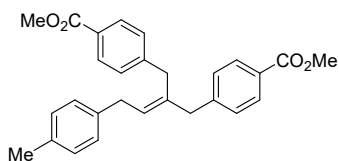

**dimethyl 4,4'-(2-(2-(p-tolyl)ethylidene)propane-1,3-diyl) dibenzoate**

**(4nb):** A colorless oil, 43.7 mg, 68% yield. Eluent: PE/EA = 10/1. <sup>1</sup>H

**NMR** (400 MHz, CDCl<sub>3</sub>) δ 7.99 – 7.92 (m, 4H), 7.22 – 7.15 (m, 4H),

7.15 – 7.07 (m, 4H), 5.67 (t, *J* = 7.2 Hz, 1H), 3.92 (s, 3H), 3.91 (s, 3H), 3.51 (d, *J* = 7.4 Hz, 2H),

3.44 (s, 2H), 3.28 (s, 2H), 2.34 (s, 3H); <sup>13</sup>C **NMR** (151 MHz, CDCl<sub>3</sub>) δ 167.1, 167.0, 145.2, 144.9,

137.5, 136.5, 135.6, 129.8, 129.7, 129.3, 129.1, 128.74, 128.69, 128.2, 52.03, 52.01, 43.1, 35.4,

34.0, 21.0; **IR (neat):** ν 2951, 1719, 1609, 1435, 1278, 1178, 1278, 1020, 764, 711 cm<sup>-1</sup>; **HRMS**

(ESI) m/z: [M+Na]<sup>+</sup> Calcd. for C<sub>28</sub>H<sub>28</sub>O<sub>4</sub>Na 451.1880; found 451.1882.

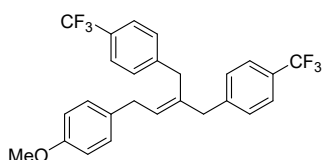

**4,4'-(2-(2-(4-methoxyphenyl)ethylidene)propane-1,3-**

**diyl)bis((trifluoromethyl)benzene) (4oa):** A yellow oil, 41.1 mg, 59%

yield. Eluent: PE/EA = 10/1. <sup>1</sup>H **NMR** (400 MHz, CDCl<sub>3</sub>) δ 7.56 – 7.48

(m, 4H), 7.25 – 7.17 (m, 4H), 7.11 (d, *J* = 8.6 Hz, 2H), 6.87 (d, *J* = 8.6 Hz, 2H), 5.70 (t, *J* = 7.4 Hz,

1H), 3.81 (s, 3H), 3.49 (d, *J* = 7.5 Hz, 2H), 3.44 (s, 2H), 3.29 (s, 2H); <sup>13</sup>C **NMR** (151 MHz, CDCl<sub>3</sub>)

δ 158.1, 143.7, 143.4, 136.2, 132.5, 129.3, 129.2, 129.1, 128.9, 128.6 (q, *J* = 32.6 Hz), 124.3 (q, *J* =

271.8 Hz), 125.4 (q, *J* = 4.2 Hz), 125.3 (t, *J* = 4.2 Hz), 114.0, 55.3, 42.9, 35.2, 33.5; <sup>19</sup>F **NMR** (565

MHz, CDCl<sub>3</sub>) δ -62.4; **IR (neat):** ν 2920, 2830, 1615, 1510, 1321, 1245, 1160, 1118, 1106, 1065,

1018, 851, 818 cm<sup>-1</sup>; **HRMS** (EI) m/z: [M]<sup>+</sup> Calcd. for C<sub>26</sub>H<sub>22</sub>F<sub>6</sub>O 464.1569; found 464.1571.

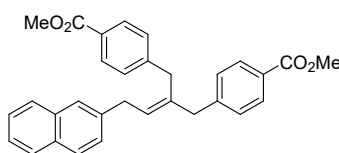

**dimethyl 4,4'-(2-(2-(naphthalen-2-yl)ethylidene)propane -1,3-**

**diyl) dibenzoate (4pb):** A yellow oil, 43.2 mg, 62% yield. Eluent:

PE/EA = 10/1. <sup>1</sup>H **NMR** (400 MHz, CDCl<sub>3</sub>) δ 7.99 – 7.93 (m, 4H),

7.85 – 7.75 (m, 3H), 7.62 (s, 1H), 7.50 – 7.42 (m, 2H), 7.38 – 7.29 (m, 1H), 7.23 – 7.17 (m, 4H),

5.77 (t, *J* = 7.5 Hz, 1H), 3.92 (s, 3H), 3.91 (s, 3H), 3.70 (d, *J* = 7.4 Hz, 2H), 3.49 (s, 2H), 3.32 (s,

2H); <sup>13</sup>C **NMR** (151 MHz, CDCl<sub>3</sub>) δ 167.1, 167.0, 145.1, 144.8, 138.1, 137.1, 133.6, 132.1, 129.8,

129.7, 129.1, 128.7, 128.3, 128.2, 127.6, 127.4, 127.1, 126.3, 126.1, 125.4, 52.04, 52.02, 43.1, 35.5,

34.6; **IR (neat):** ν 2951, 2917, 1719, 1608, 1434, 1278, 1109, 1019, 762 cm<sup>-1</sup>; **HRMS** (ESI) m/z:

[M+Na]<sup>+</sup> Calcd. for C<sub>31</sub>H<sub>28</sub>O<sub>4</sub>Na 487.1880; found 487.1877.

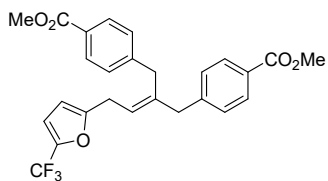

**dimethyl 4,4'-(2-(2-(5-(trifluoromethyl)furan-2-yl)ethylidene)**

**propane-1,3-diyl)dibenzoate (4qb):** A yellow oil, 28.3 mg, 40% yield.

Eluent: PE/EA = 10/1. <sup>1</sup>H NMR (400 MHz, CDCl<sub>3</sub>) δ 7.99 – 7.93 (m, 4H), 7.20 – 7.14 (m, 4H), 6.70 (d, *J* = 3.3 Hz, 1H), 6.08 (d, *J* = 3.6 Hz,

1H), 5.63 (t, *J* = 7.4 Hz, 1H), 3.920 (s, 3H), 3.915 (s, 3H), 3.57 (d, *J* = 7.4 Hz, 2H), 3.41 (s, 2H), 3.30 (s, 2H); <sup>13</sup>C NMR (151 MHz, CDCl<sub>3</sub>) δ 167.02, 166.98, 157.0, 144.5, 144.2, 140.6 (q, *J* = 43.0 Hz), 139.4, 129.9, 129.8, 129.0, 128.6, 123.2, 119.2 (q, *J* = 266.3 Hz), 112.4 (q, *J* = 3.2 Hz), 106.4, 52.1, 52.0, 42.9, 35.5, 27.2; <sup>19</sup>F NMR (565 MHz, CDCl<sub>3</sub>) δ -63.9; IR (neat): ν 2953, 1718, 1610, 1557, 1435, 1323, 1275, 1177, 1102, 1019, 798, 763, 710 cm<sup>-1</sup>; HRMS (ESI) *m/z*: [M+Na]<sup>+</sup> Calcd. for C<sub>26</sub>H<sub>23</sub>O<sub>5</sub>F<sub>3</sub>Na 495.1390; found 495.1386.

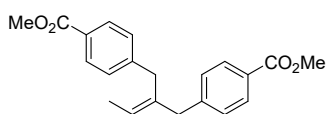

**dimethyl 4,4'-(2-ethylidenepropane-1,3-diyl)dibenzoate (4ab):** A

colorless oil, 31.4 mg, 62% yield. Eluent: PE/EA = 10/1. <sup>1</sup>H NMR (400 MHz, CDCl<sub>3</sub>) δ 7.97 – 7.92 (m, 4H), 7.21 – 7.12 (m, 4H), 5.52 (q, *J* =

6.8 Hz, 1H), 3.913 (s, 3H), 3.908 (s, 3H), 3.34 (s, 2H), 3.23 (s, 2H), 1.78 (d, *J* = 6.7 Hz, 3H); <sup>13</sup>C NMR (151 MHz, CDCl<sub>3</sub>) δ 167.10, 167.08, 145.4, 145.3, 136.7, 129.8, 129.6, 129.1, 128.6, 128.11, 128.06, 123.8, 52.00, 51.99, 43.0, 35.1, 13.8; IR (neat): ν 2950, 2917, 1716, 1608, 1434, 1272, 1176, 1100, 1019, 966, 860, 836, 762 cm<sup>-1</sup>; HRMS (ESI) *m/z*: [M+H]<sup>+</sup> Calcd. for C<sub>21</sub>H<sub>23</sub>O<sub>4</sub> 339.1590; found 339.1595.

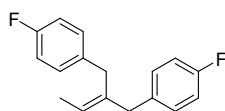

**4,4'-(2-ethylidenepropane-1,3-diyl)bis(fluorobenzene) (4ac):** A colorless oil,

25.4 mg, 66% yield. Eluent: PE. <sup>1</sup>H NMR (400 MHz, CDCl<sub>3</sub>) δ 7.11 – 7.01 (m, 4H), 7.00 – 6.90 (m, 4H), 5.46 (q, *J* = 6.6 Hz, 1H), 3.25 (s, 2H), 3.15 (s, 2H),

1.76 (d, *J* = 6.8 Hz, 3H); <sup>13</sup>C NMR (151 MHz, CDCl<sub>3</sub>) δ 161.4 (d, *J* = 243.7 Hz), 161.3 (d, *J* = 243.7 Hz), 138.0, 135.56 (d, *J* = 3.5 Hz), 135.39 (d, *J* = 3.5 Hz), 130.35 (d, *J* = 7.8 Hz), 129.87 (d, *J* = 7.8 Hz), 122.6, 115.1 (d, *J* = 21.0 Hz), 114.9 (d, *J* = 21.4 Hz), 42.1, 34.1, 13.7; <sup>19</sup>F NMR (565 MHz, CDCl<sub>3</sub>) δ -117.5; IR (neat): ν 2923, 2855, 1601, 1506, 1437, 1220, 1155, 1093, 1016, 822,

772 cm<sup>-1</sup>; **HRMS** (DART) m/z: [M]<sup>+</sup> Calcd. for C<sub>17</sub>H<sub>16</sub>F<sub>2</sub> 258.1215; found 258.1214.

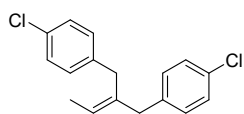

**4,4'-(2-ethylidene-1,3-diyloxy)bis(chlorobenzene) (4ad):** A colorless oil,

24.4 mg, 56% yield. Eluent: PE. <sup>1</sup>H NMR (400 MHz, CDCl<sub>3</sub>) δ 7.26 – 7.20 (m, 4H), 7.07 – 6.98 (m, 4H), 5.47 (q, *J* = 6.8 Hz, 1H), 3.24 (s, 2H), 3.14 (s, 2H),

1.75 (d, *J* = 6.8 Hz, 3H); <sup>13</sup>C NMR (151 MHz, CDCl<sub>3</sub>) δ 138.4, 138.2, 137.4, 131.8, 131.7, 130.4, 129.9, 128.5, 128.3, 123.2, 42.2, 34.3, 13.7; **IR** (neat): ν 2921, 2855, 1607, 1489, 1406, 1090, 1015, 840, 802 cm<sup>-1</sup>; **HRMS** (DART) m/z: [M]<sup>+</sup> Calcd. for C<sub>17</sub>H<sub>16</sub>Cl<sub>2</sub> 290.0624; found 290.0621.

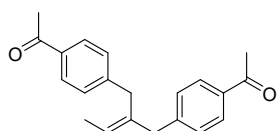

**1,1'-((2-ethylidene-1,3-diyloxy)bis(4,1-phenylene))bis(ethan-1-one)**

**(4ae):** A colorless oil, 32.2 mg, 70% yield. Eluent: PE/EA = 10/1. <sup>1</sup>H NMR

(400 MHz, CDCl<sub>3</sub>) δ 7.93 – 7.83 (m, 4H), 7.22 – 7.16 (m, 4H), 5.54 (q, *J* =

6.7 Hz, 1H), 3.35 (s, 2H), 3.24 (s, 2H), 2.594 (s, 3H), 2.587 (s, 3H), 1.78 (d, *J* = 6.8 Hz, 3H); <sup>13</sup>C NMR (151 MHz, CDCl<sub>3</sub>) δ 197.83, 197.79, 145.7, 145.5, 136.5, 135.32, 135.27, 129.2, 128.7, 128.6, 128.4, 124.0, 43.0, 35.1, 26.5, 13.8; **IR** (neat): ν 2906, 2861, 1677, 1603, 1410, 1356, 1264, 1179, 1113, 1016, 956, 851, 815 cm<sup>-1</sup>; **HRMS** (ESI) m/z: [M+H]<sup>+</sup> Calcd. for C<sub>21</sub>H<sub>23</sub>O<sub>2</sub> 307.1693; found 307.1694.

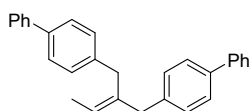

**4,4''-(2-ethylidene-1,3-diyloxy)di-1,1'-biphenyl (4ag):** A yellow oil,

41.6 mg, 74% yield. Eluent: PE. <sup>1</sup>H NMR (400 MHz, CDCl<sub>3</sub>) δ 7.63 – 7.58

(m, 4H), 7.56 – 7.51 (m, 4H), 7.49 – 7.39 (m, 5H), 7.37 – 7.32 (m, 2H), 7.25 –

7.20 (m, 3H), 5.56 (q, *J* = 6.7 Hz, 1H), 3.40 (s, 2H), 3.31 (s, 2H), 1.83 (d, *J* = 6.7 Hz, 3H); <sup>13</sup>C NMR (151 MHz, CDCl<sub>3</sub>) δ 141.09, 141.08, 139.3, 139.2, 138.91, 138.87, 138.1, 129.5, 129.1, 128.71, 128.70, 127.1, 127.02, 126.99, 126.96, 122.6, 42.7, 34.7, 13.8; **IR** (neat): ν 2921, 2853, 1601, 1486, 1448, 1407, 1007, 847, 820, 761, 739 cm<sup>-1</sup>; **HRMS** (DART) m/z: [M]<sup>+</sup> Calcd. for C<sub>29</sub>H<sub>26</sub> 374.2029; found 374.2027.

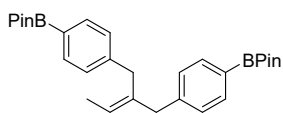

**2,2'-((2-ethylidene-1,3-diyloxy)bis(4,1-phenylene))bis(4,4,5,5-**

**tetramethyl-1,3,2-dioxaborolane) (4ah):** A colorless oil, 33.4 mg, 47%

yield. Eluent: PE/EA = 10/1. <sup>1</sup>H NMR (400 MHz, CDCl<sub>3</sub>) δ 7.75 – 7.69 (m, 4H), 7.18 – 7.08 (m, 4H), 5.45 (q, *J* = 6.8 Hz, 1H), 3.29 (s, 2H), 3.18 (s, 2H), 1.75 (d, *J* = 6.7 Hz, 3H), 1.35 (s, 12H), 1.34 (s, 12H); <sup>13</sup>C NMR (151 MHz, CDCl<sub>3</sub>) δ 143.6, 143.5, 137.7, 134.9, 134.8, 134.7, 128.6, 128.1, 127.7, 122.7, 83.7, 83.6, 43.1, 35.2, 24.9, 13.7; **IR (neat):** ν 2977, 2925, 2850, 1610, 1397, 1359, 1144, 1088, 1021, 962, 859 cm<sup>-1</sup>; **HRMS (DART) m/z:** [M+H]<sup>+</sup> Calcd. for C<sub>29</sub>H<sub>41</sub>O<sub>4</sub>B<sub>2</sub> 475.3185; found 475.3181.

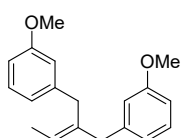

**3,3'-((2-ethylidene-1,3-diyloxy)bis(methoxybenzene) (4ai):** A yellow oil,

21.1 mg, 50% yield. Eluent: PE/EA = 10/1. <sup>1</sup>H NMR (400 MHz, CDCl<sub>3</sub>) δ 7.22 –

7.16 (m, 2H), 6.76 – 6.66 (m, 6H), 5.49 (q, *J* = 6.8 Hz, 1H), 3.79 (s, 3H), 3.78 (s, 3H), 3.28 (s, 2H), 3.19 (s, 2H), 1.76 (d, *J* = 6.7 Hz, 3H); <sup>13</sup>C NMR (151 MHz, CDCl<sub>3</sub>) δ 159.7, 159.5, 141.9, 141.7, 137.9, 129.2, 129.1, 122.6, 121.6, 121.1, 114.8, 114.4, 111.2, 111.0, 55.1, 43.1, 34.9, 13.8; **IR (neat):** ν 2917, 2834, 1598, 1583, 1488, 1436, 1311, 1258, 1147, 1050, 874, 782, 749 cm<sup>-1</sup>; **HRMS (ESI) m/z:** [M+H]<sup>+</sup> Calcd. for C<sub>19</sub>H<sub>23</sub>O<sub>2</sub> 283.1693; found 283.1690.

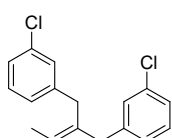

**3,3'-((2-ethylidene-1,3-diyloxy)bis(chlorobenzene) (4aj):** A colorless oil, 23.0

mg, 53% yield. Eluent: PE. <sup>1</sup>H NMR (400 MHz, CDCl<sub>3</sub>) δ 7.24 – 7.15 (m, 4H), 7.09

(s, 2H), 7.03 – 6.94 (m, 2H), 5.52 (q, *J* = 6.8 Hz, 1H), 3.27 (s, 2H), 3.17 (s, 2H), 1.77 (d, *J* = 6.6 Hz, 3H); <sup>13</sup>C NMR (151 MHz, CDCl<sub>3</sub>) δ 142.0, 141.8, 136.7, 134.2, 134.1, 129.6, 129.5, 129.0, 128.6, 127.3, 126.8, 126.3, 126.2, 123.8, 42.7, 34.7, 13.8; **IR (neat):** ν 2969, 2919, 1595, 1572, 1473, 1429, 1077, 1056, 862, 781, 709 cm<sup>-1</sup>; **HRMS (DART) m/z:** [M+H]<sup>+</sup> Calcd. for C<sub>17</sub>H<sub>17</sub>Cl<sub>2</sub> 291.0702; found 291.0704.

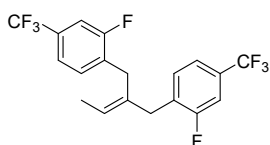

**4,4'-((2-ethylidene-1,3-diyloxy)bis(3-fluoro-1-**

**(trifluoromethyl)benzene) (4ak):** A colorless oil, 37.3 mg g, 63% yield.

Eluent: PE. Containing a trace amount of impurity that failed to be separated.

<sup>1</sup>H NMR (400 MHz, CDCl<sub>3</sub>) δ 7.33 – 7.28 (m, 3H), 7.24 – 7.19 (m, 3H), 5.52 (q, *J* = 6.8 Hz, 1H),

3.43 (s, 2H), 3.30 (s, 2H), 1.74 (d,  $J = 6.8$  Hz, 3H);  $^{13}\text{C}$  NMR (151 MHz,  $\text{CDCl}_3$ )  $\delta$  160.73 (d,  $J = 247.8$  Hz), 160.67 (d,  $J = 247.6$  Hz), 133.4, 131.7 (d,  $J = 4.9$  Hz), 130.9 (qd,  $J = 33.4, 7.7$  Hz), 130.8 (d,  $J = 16.0$  Hz), 130.6 (d,  $J = 5.5$  Hz), 130.4 (d,  $J = 16.0$  Hz), 130.3 (qd,  $J = 33.4, 7.7$  Hz), 125.2, 123.3 (q,  $J = 271.9$  Hz), 120.9 (q,  $J = 4.2$  Hz), 120.7 (q,  $J = 4.2$  Hz), 112.7 (dq,  $J = 26.3, 4.2$  Hz), 112.6 (dq,  $J = 26.3, 4.2$  Hz), 35.8 (d,  $J = 3.5$  Hz), 28.4 (d,  $J = 3.5$  Hz), 13.7;  $^{19}\text{F}$  NMR (565 MHz,  $\text{CDCl}_3$ )  $\delta$  -62.62, -62.65, -115.1, -115.5; **IR (neat)**:  $\nu$  2948, 2923, 1574, 1515, 1427, 1326, 1217, 1166, 1124, 1065, 909, 878, 825, 744  $\text{cm}^{-1}$ ; **HRMS** (EI)  $m/z$ :  $[\text{M}]^+$  Calcd. for  $\text{C}_{19}\text{H}_{14}\text{F}_8$  394.0962; found 394.0971.

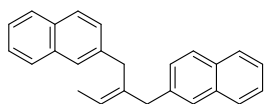

**2,2'-(2-ethylidenepropane-1,3-diyl)dinaphthalene (4a1)**: A colorless oil,

28.6 mg, 59% yield. Eluent: PE.  $^1\text{H}$  NMR (400 MHz,  $\text{CDCl}_3$ )  $\delta$  7.84 – 7.74 (m, 6H), 7.57 (s, 1H), 7.53 (s, 1H), 7.48 – 7.40 (m, 4H), 7.32 – 7.26 (m, 2H), 5.58 (q,  $J = 6.8$  Hz, 1H), 3.49 (s, 2H), 3.39 (s, 2H), 1.84 (d,  $J = 6.7$  Hz, 3H);  $^{13}\text{C}$  NMR (151 MHz,  $\text{CDCl}_3$ )  $\delta$  138.0, 137.7, 137.6, 133.6, 133.5, 132.14, 132.11, 128.0, 127.8, 127.7, 127.6, 127.5, 127.41, 127.38, 126.8, 125.9, 125.8, 125.2, 122.9, 43.2, 35.2, 13.9; **IR (neat)**:  $\nu$  3051, 2922, 2853, 1631, 1599, 1507, 1438, 1364, 1269, 1016, 958, 891, 853, 815, 753  $\text{cm}^{-1}$ ; **HRMS** (ESI)  $m/z$ :  $[\text{M}+\text{H}]^+$  Calcd. for  $\text{C}_{25}\text{H}_{23}$  323.1794; found 323.1823.

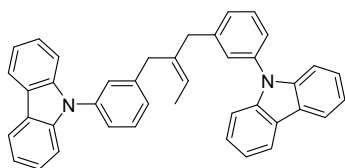

**9,9'-((2-ethylidenepropane-1,3-diyl)bis(3,1-phenylene))bis(9H-**

**carbazole) (4am)**: A yellow oil, 56.1 mg, 68% yield. Eluent: PE/EA =

20/1.  $^1\text{H}$  NMR (400 MHz,  $\text{CDCl}_3$ )  $\delta$  8.13 (d,  $J = 7.7$  Hz, 4H), 7.52 – 7.43 (m, 2H), 7.41 – 7.31 (m, 13H), 7.27 – 7.21 (m, 5H), 5.58 (q,  $J = 6.7$  Hz, 1H), 3.50 (s, 2H), 3.40 (s, 2H), 1.77 (d,  $J = 6.7$  Hz, 3H);  $^{13}\text{C}$  NMR (151 MHz,  $\text{CDCl}_3$ )  $\delta$  142.1, 141.8, 140.82, 140.80, 137.8, 137.7, 137.1, 129.8, 129.7, 128.2, 127.7, 127.5, 127.0, 125.9, 125.8, 124.8, 124.7, 123.8, 123.3, 120.3, 119.81, 119.80, 109.8, 109.7, 43.2, 35.1, 13.8; **IR (neat)**:  $\nu$  3057, 2909, 1711, 1595, 1494, 1477, 1451, 1359, 1220, 1155, 1089, 792, 749, 724  $\text{cm}^{-1}$ ; **HRMS** (ESI)  $m/z$ :  $[\text{M}+\text{Na}]^+$  Calcd. for  $\text{C}_{41}\text{H}_{32}\text{N}_2\text{Na}$  575.2458; found 575.2470.

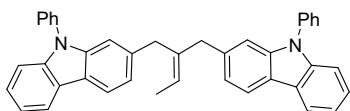

**2,2'-(2-ethylidene-1,3-diyloxy)bis(9-phenyl-9H-carbazole)**

**(4an):** A colorless oil, 45.6 mg, 55% yield. Eluent: PE/EA = 20/1.  $^1\text{H}$

**NMR** (400 MHz,  $\text{CDCl}_3$ )  $\delta$  8.14 – 8.07 (m, 2H), 8.00 (t,  $J = 7.7$  Hz, 2H), 7.55 – 7.41 (m, 10H), 7.40 – 7.35 (m, 4H), 7.31 – 7.27 (m, 2H), 7.13 – 7.00 (m, 4H), 5.46 (q,  $J = 6.8$  Hz, 1H), 3.48 (s, 2H), 3.37 (s, 2H), 1.76 (d,  $J = 6.7$  Hz, 3H);  $^{13}\text{C}$  **NMR** (151 MHz,  $\text{CDCl}_3$ )  $\delta$  141.2, 141.1, 140.9, 138.7, 138.6, 138.4, 137.7, 129.7, 127.23, 127.21, 127.0, 126.9, 125.44, 125.42, 123.4, 122.3, 121.49, 121.48, 121.4, 120.9, 119.98, 119.96, 119.83, 119.80, 110.2, 109.8, 109.69, 109.68, 43.7, 35.8, 13.8; **IR** (neat):  $\nu$  3046, 2922, 2855, 1713, 1625, 1597, 1503, 1458, 1435, 1361, 1337, 1232, 811, 760, 743  $\text{cm}^{-1}$ ; **HRMS** (ESI)  $m/z$ :  $[\text{M}+\text{H}]^+$  Calcd. for  $\text{C}_{41}\text{H}_{33}\text{N}_2$  553.2638; found 553.2645.

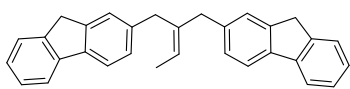

**2,2'-(2-ethylidene-1,3-diyloxy)bis(9H-fluorene)** **(4ao):** A

colorless oil, 30.0 mg, 50% yield. Eluent: PE.  $^1\text{H}$  **NMR** (400 MHz,  $\text{CDCl}_3$ )  $\delta$  7.79 – 7.67 (m, 4H), 7.55 – 7.48 (m, 2H), 7.42 – 7.26 (m, 6H), 7.20 – 7.10 (m, 2H), 5.53 (q,  $J = 6.8$  Hz, 1H), 3.86 (d,  $J = 5.7$  Hz, 4H), 3.41 (s, 2H), 3.31 (s, 2H), 1.83 (d,  $J = 6.8$  Hz, 3H);  $^{13}\text{C}$  **NMR** (151 MHz,  $\text{CDCl}_3$ )  $\delta$  143.6, 143.4, 143.18, 143.15, 141.72, 141.70, 139.7, 139.6, 139.0, 138.9, 138.8, 127.8, 127.3, 126.7, 126.6, 126.3, 125.8, 125.3, 124.97, 124.95, 122.2, 119.65, 119.59, 119.5, 43.2, 36.84, 36.80, 35.2, 13.9; **IR** (acetone):  $\nu$  2921, 2853, 1614, 1455, 1426, 1401, 1360, 1219, 1176, 1097, 1025, 1005, 953, 823, 761, 738  $\text{cm}^{-1}$ ; **HRMS** (DART)  $m/z$ :  $[\text{M}]^+$  Calcd. for  $\text{C}_{31}\text{H}_{26}$  398.2029; found 398.2025.

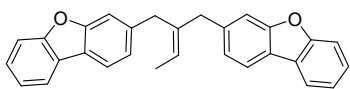

**3,3'-(2-ethylidene-1,3-diyloxy)bis(2,3-dihydrobenzo[b,d]furan)** **(4ap):** A

yellow oil, 37.0 mg, 61% yield. Eluent: PE/EA = 10/1.  $^1\text{H}$  **NMR** (400 MHz,  $\text{CDCl}_3$ )  $\delta$  7.96 – 7.89 (m, 2H), 7.85 (dd,  $J = 7.8, 6.3$  Hz, 2H), 7.58 – 7.51 (m, 2H), 7.43 (tdd,  $J = 8.4, 2.9, 1.4$  Hz, 2H), 7.38 – 7.28 (m, 4H), 7.18 – 7.09 (m, 2H), 5.60 (q,  $J = 6.8$  Hz, 1H), 3.49 (s, 2H), 3.40 (s, 2H), 1.85 (d,  $J = 6.8$  Hz, 3H);  $^{13}\text{C}$  **NMR** (151 MHz,  $\text{CDCl}_3$ )  $\delta$  156.7, 156.6, 156.3, 140.0, 139.9, 138.1, 126.7, 124.28, 124.26, 124.0, 123.6, 123.1, 122.62, 122.59, 122.3, 122.2, 120.4, 120.3, 120.2, 112.0, 111.6, 111.5, 43.4, 35.3, 13.8; **IR** (neat):  $\nu$  2922, 2854, 1635, 1603, 1457, 1425, 1323, 1202, 1122, 1016, 847, 763, 724  $\text{cm}^{-1}$ ; **HRMS** (ESI)  $m/z$ :  $[\text{M}+\text{Na}]^+$  Calcd. for  $\text{C}_{29}\text{H}_{22}\text{O}_2\text{Na}$



425.1512; found 425.1512.

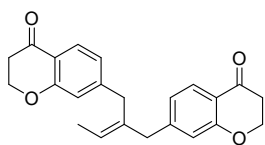

**7,7'-(2-ethylidene propane-1,3-diyl)bis(chroman-4-one) (4aq):** A colorless oil, 36.0 mg, 66% yield. Eluent: PE/EA = 4/1. **<sup>1</sup>H NMR** (400 MHz, CDCl<sub>3</sub>) δ 7.78 (dd, *J* = 8.1, 4.3 Hz, 2H), 6.77 (dd, *J* = 8.2, 4.2 Hz, 2H), 6.70 (s, 2H), 5.55 (q, *J* = 6.8 Hz, 1H), 4.51 (td, *J* = 6.5, 2.8 Hz, 4H), 3.28 (s, 2H), 3.19 (s, 2H), 2.78 (td, *J* = 6.4, 2.1 Hz, 4H), 1.76 (d, *J* = 6.7 Hz, 3H); **<sup>13</sup>C NMR** (151 MHz, CDCl<sub>3</sub>) δ 191.53, 191.49, 162.0, 161.8, 149.3, 149.1, 135.7, 127.2, 127.0, 124.6, 122.5, 122.1, 119.60, 119.57, 117.9, 117.3, 67.04, 67.01, 43.4, 37.7, 35.4, 13.8; **IR (neat):** ν 2965, 2898, 2864, 1683, 1609, 1566, 1430, 1380, 1324, 1296, 1253, 1223, 1146, 1037, 865, 827 cm<sup>-1</sup>; **HRMS (ESI) m/z:** [M+H]<sup>+</sup> Calcd. for C<sub>23</sub>H<sub>23</sub>O<sub>4</sub> 363.1591; found 363.1593.

# 11. NMR Spectra

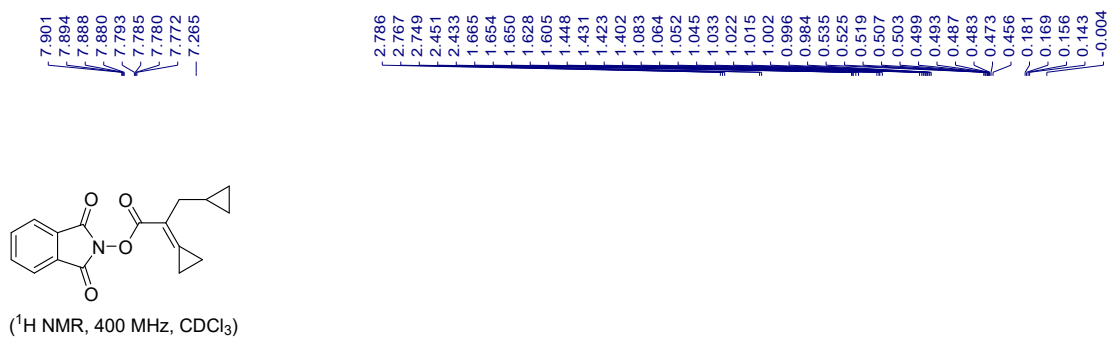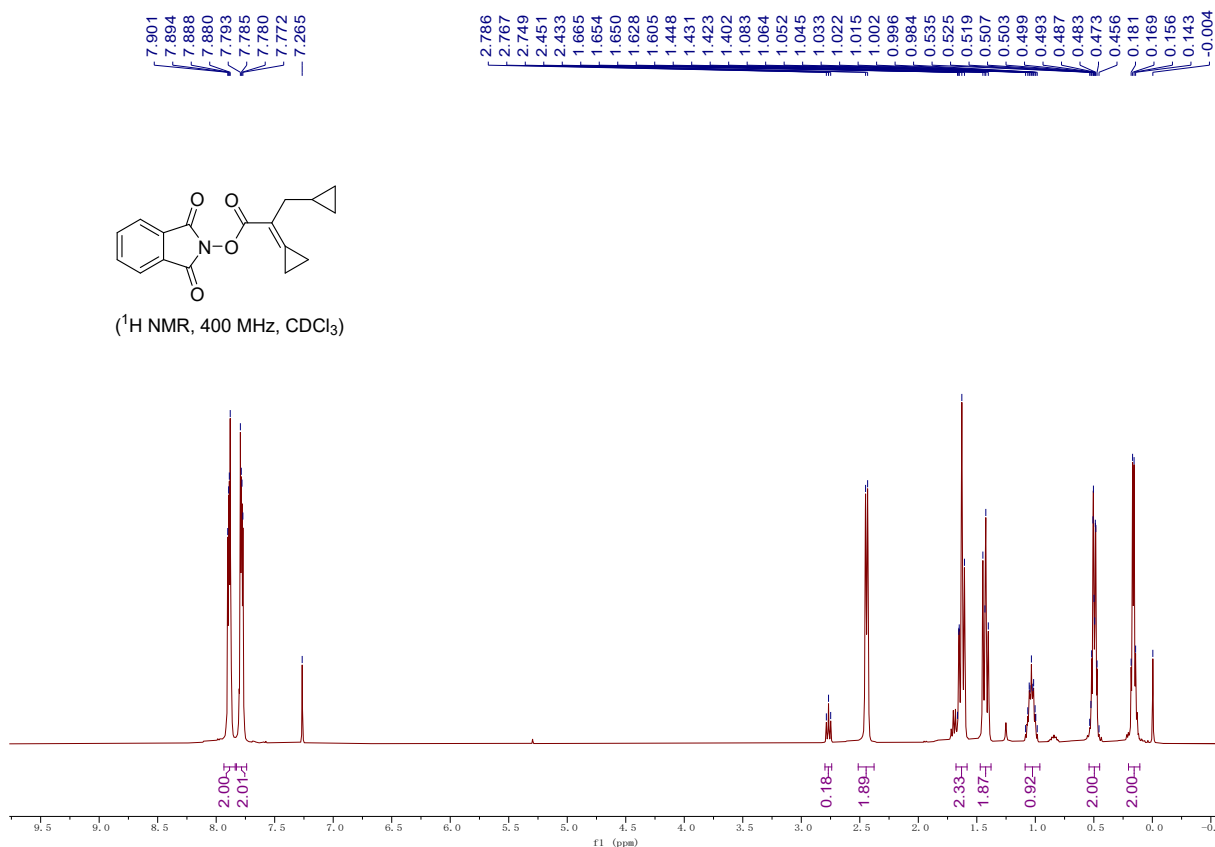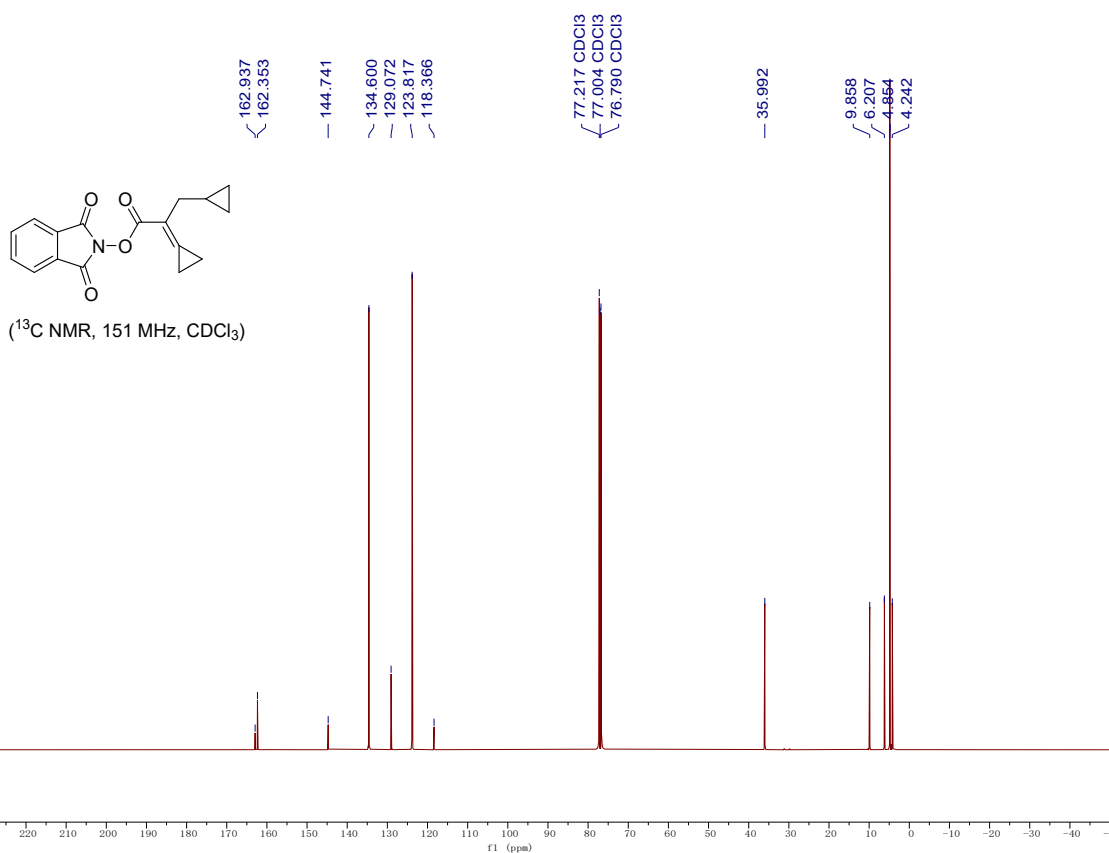

7.911  
7.904  
7.898  
7.890  
7.805  
7.798  
7.792  
7.784  
7.265

3.487  
3.483  
3.479  
3.476  
3.472  
3.469  
3.465  
2.114  
2.108  
2.101  
1.683  
1.679  
1.675  
1.672  
1.667  
1.663  
1.658  
1.654  
1.650  
1.646  
1.641  
1.637  
1.634  
1.630  
1.626  
1.622  
1.613  
1.609  
1.605  
1.602  
1.598  
1.593  
1.586  
1.573  
1.570  
1.567  
1.564  
1.560  
1.556  
1.553  
-0.000

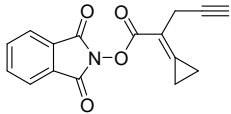

(<sup>1</sup>H NMR, 400 MHz, CDCl<sub>3</sub>)

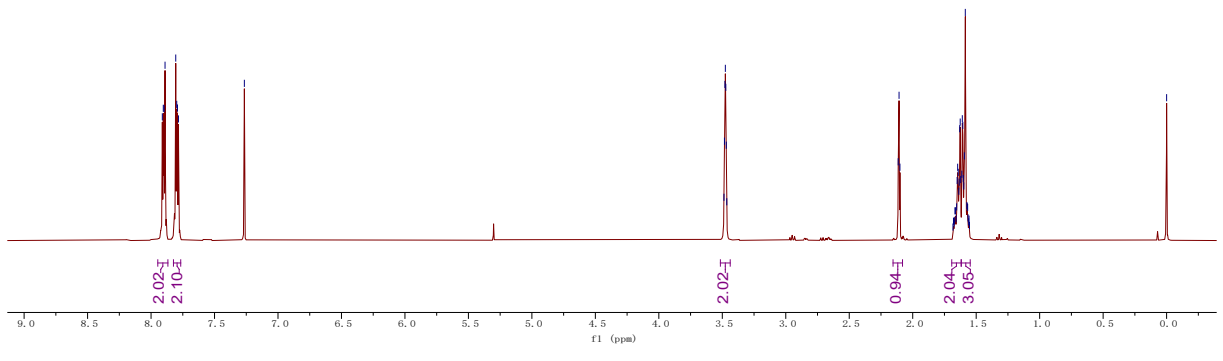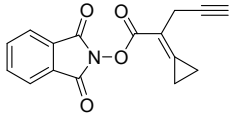

(<sup>13</sup>C NMR, 151 MHz, CDCl<sub>3</sub>)

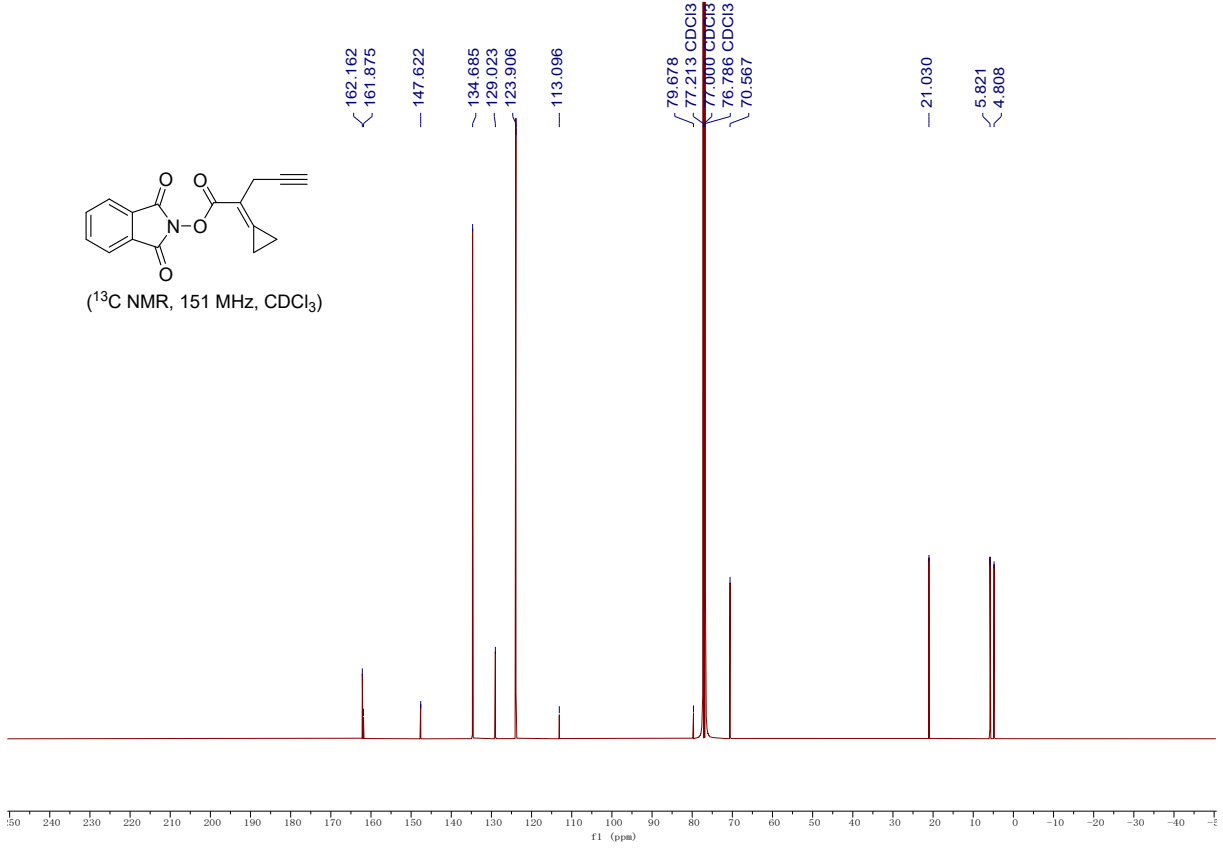

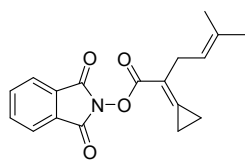

(<sup>1</sup>H NMR, 400 MHz, CDCl<sub>3</sub>)

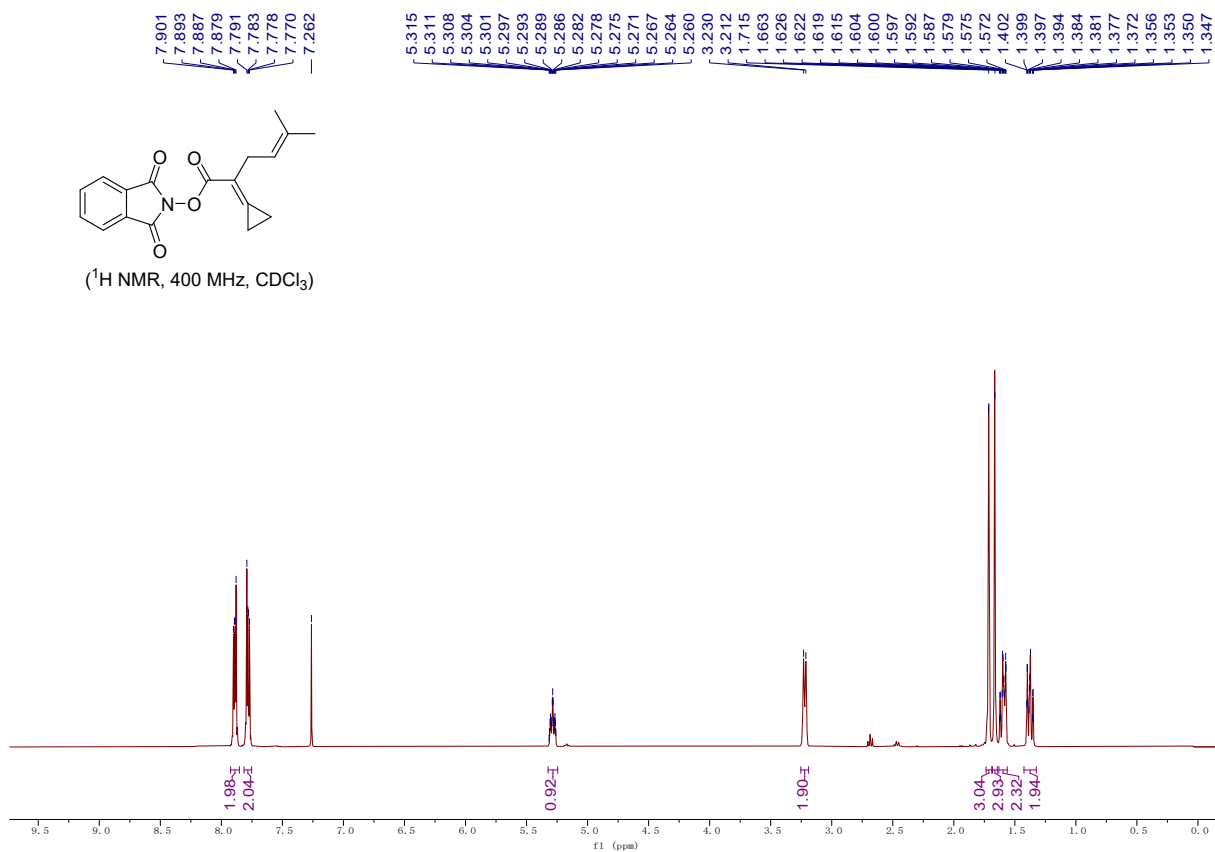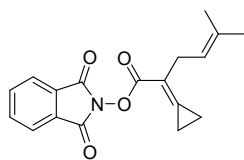

(<sup>13</sup>C NMR, 151 MHz, CDCl<sub>3</sub>)

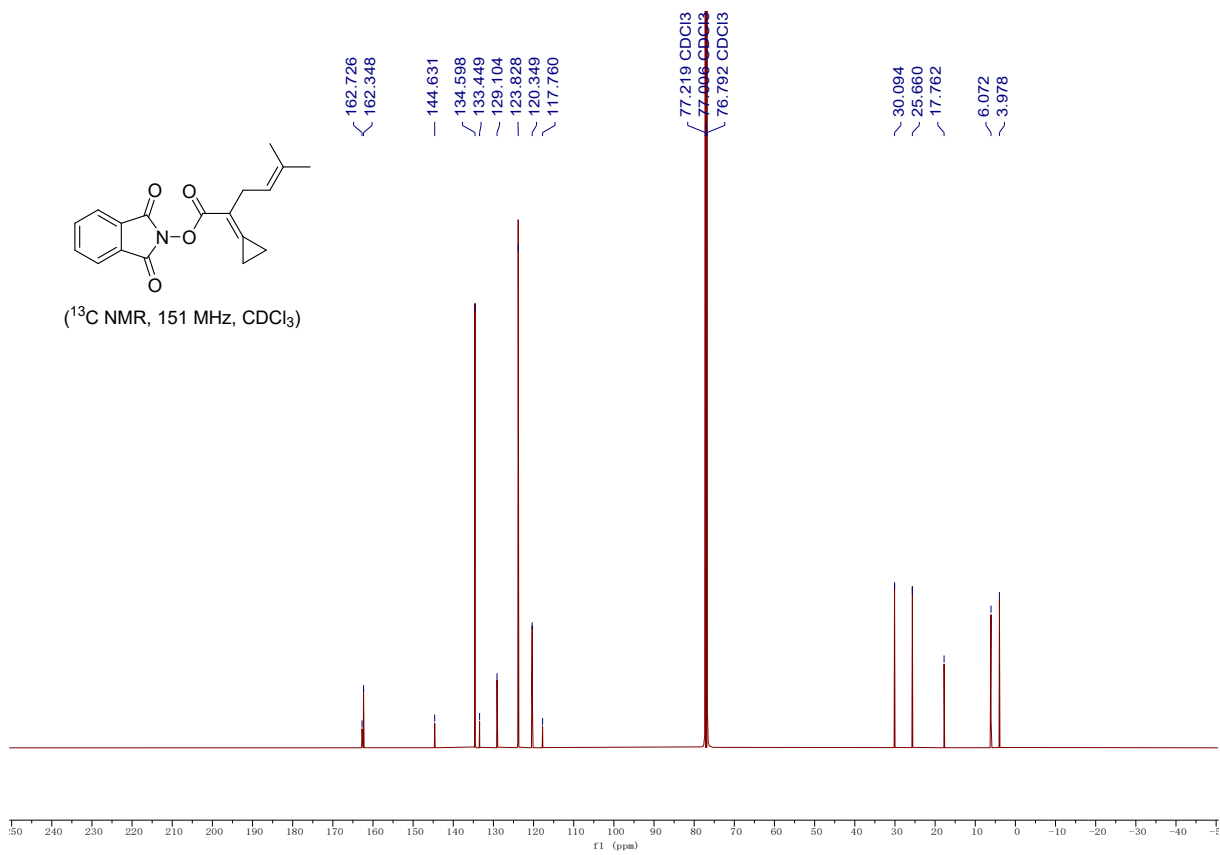

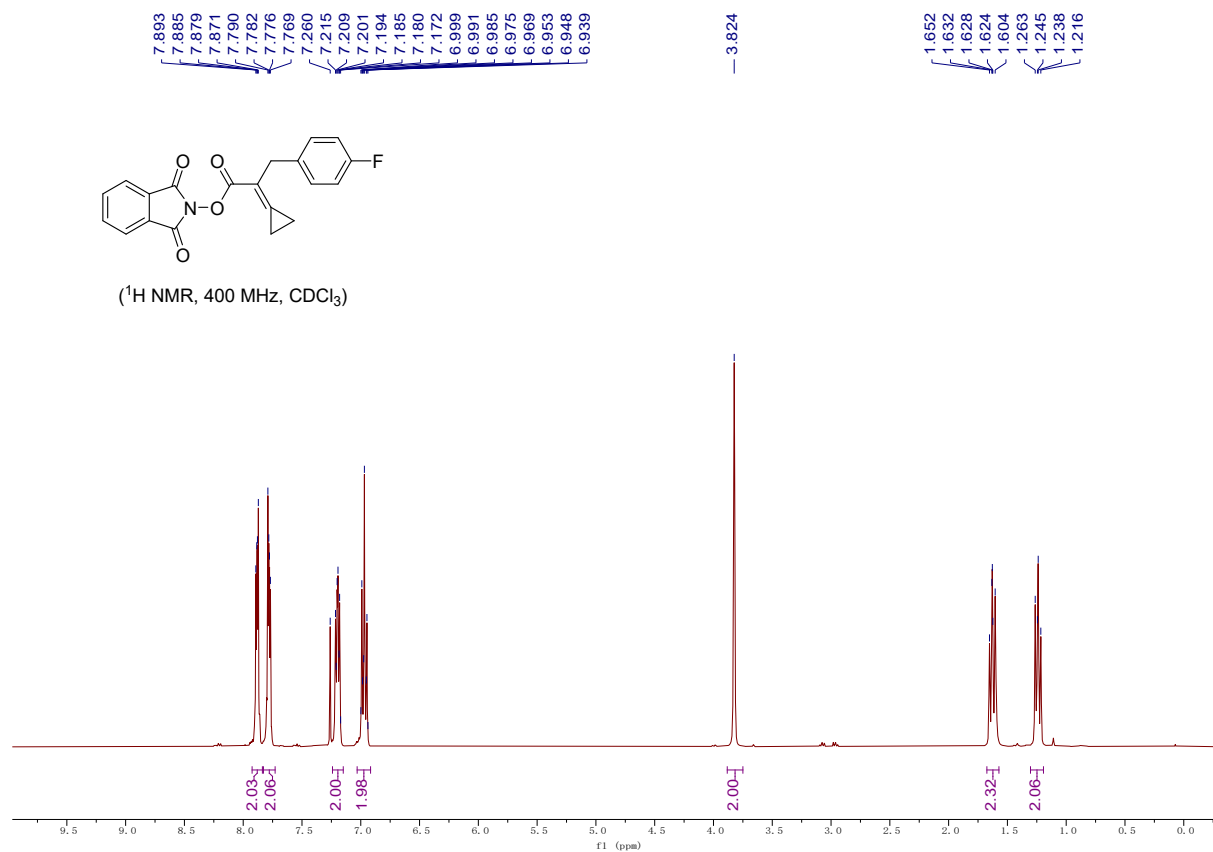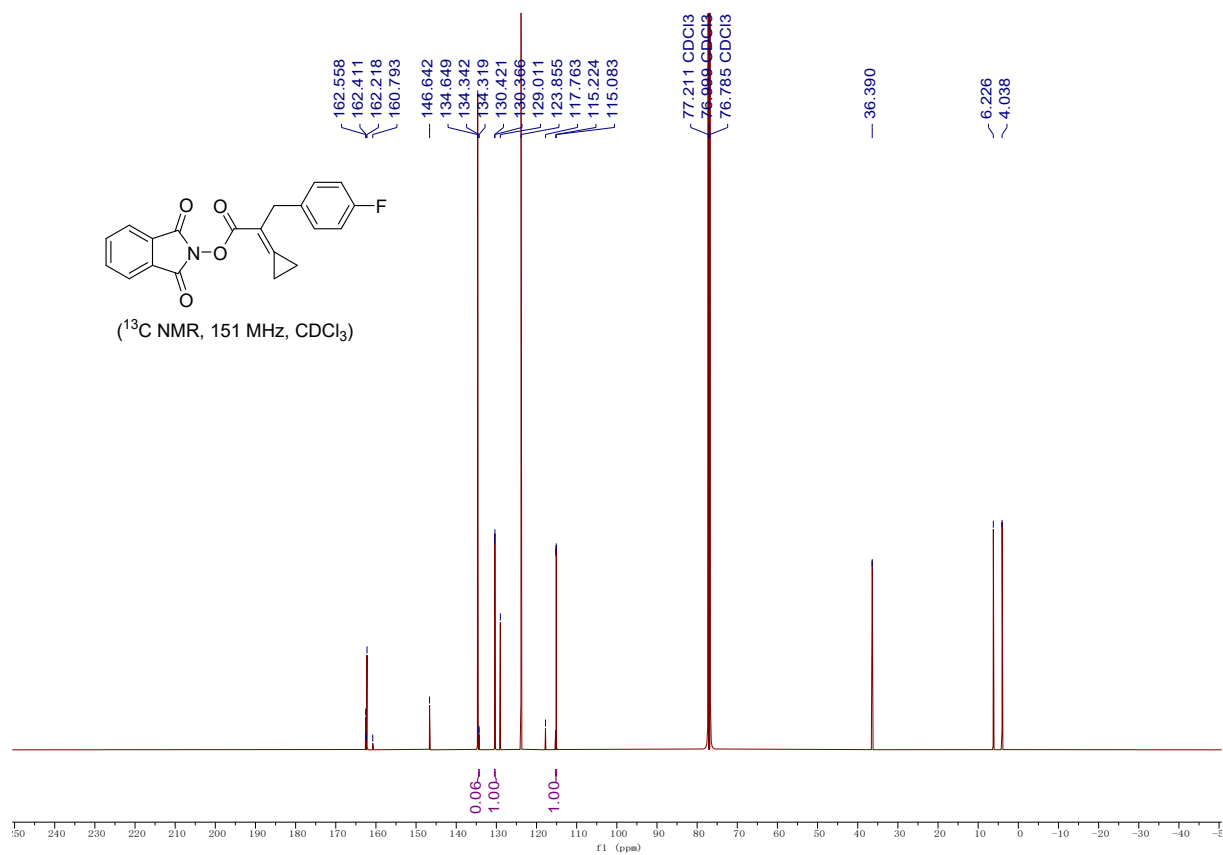

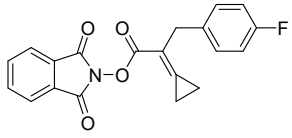

(<sup>19</sup>F NMR, 565 MHz, CDCl<sub>3</sub>)

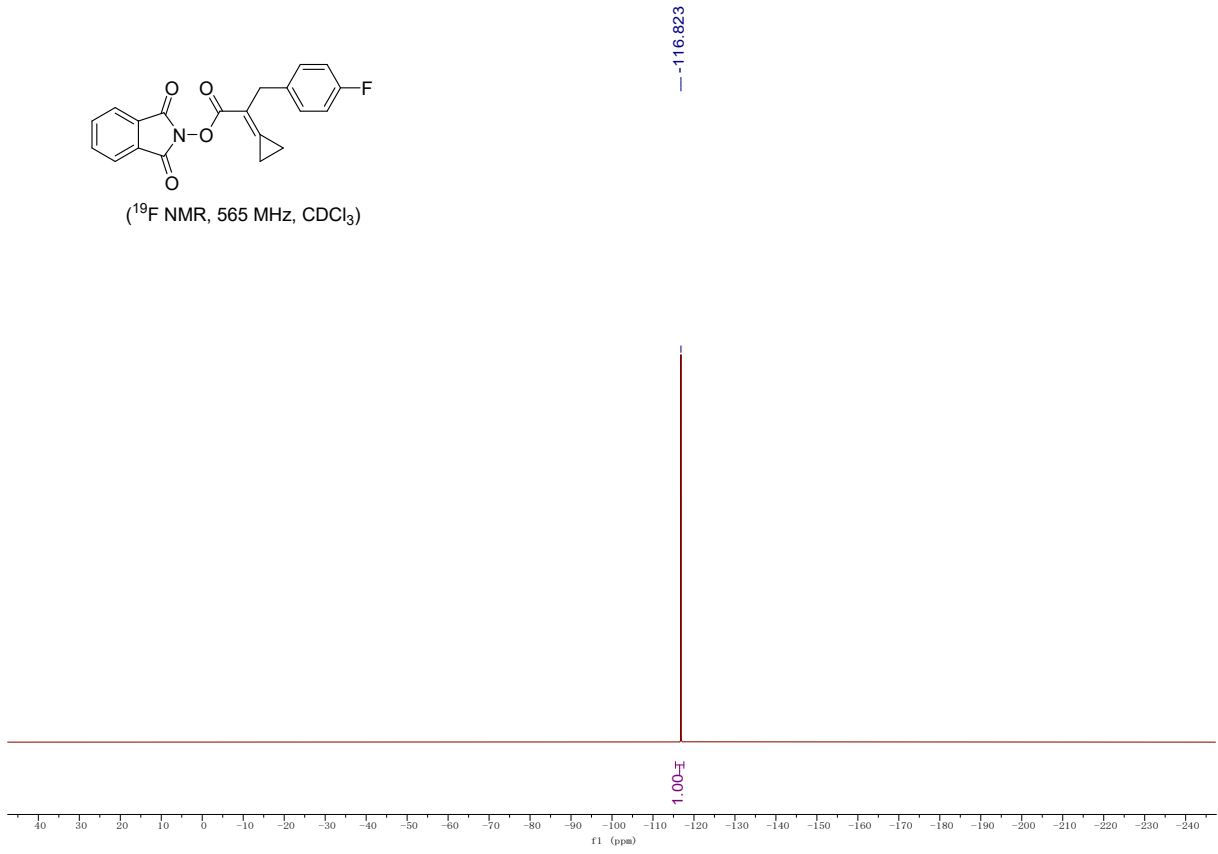

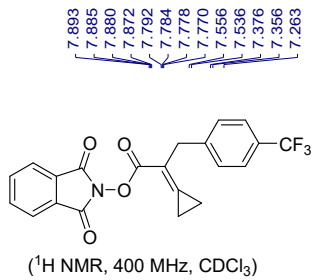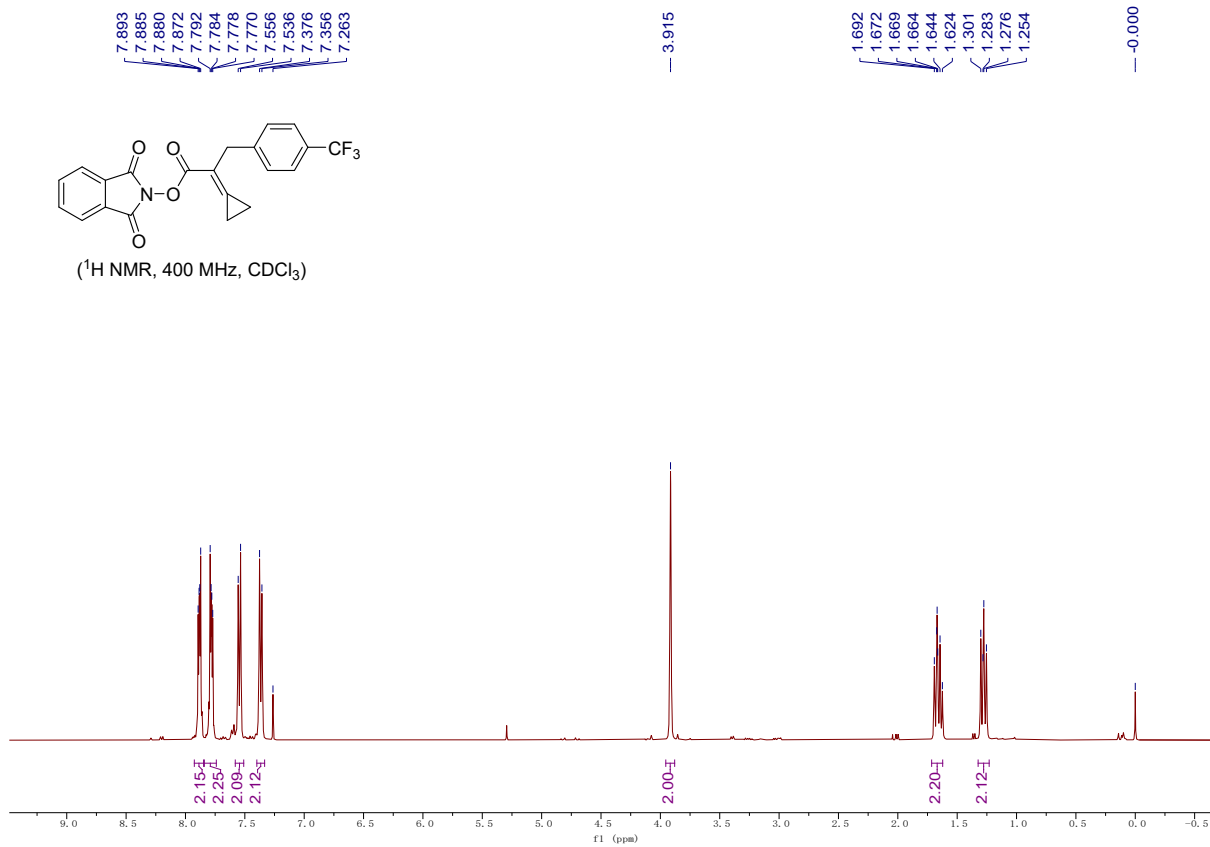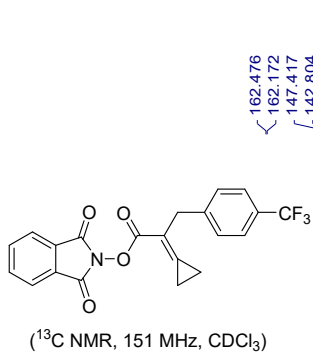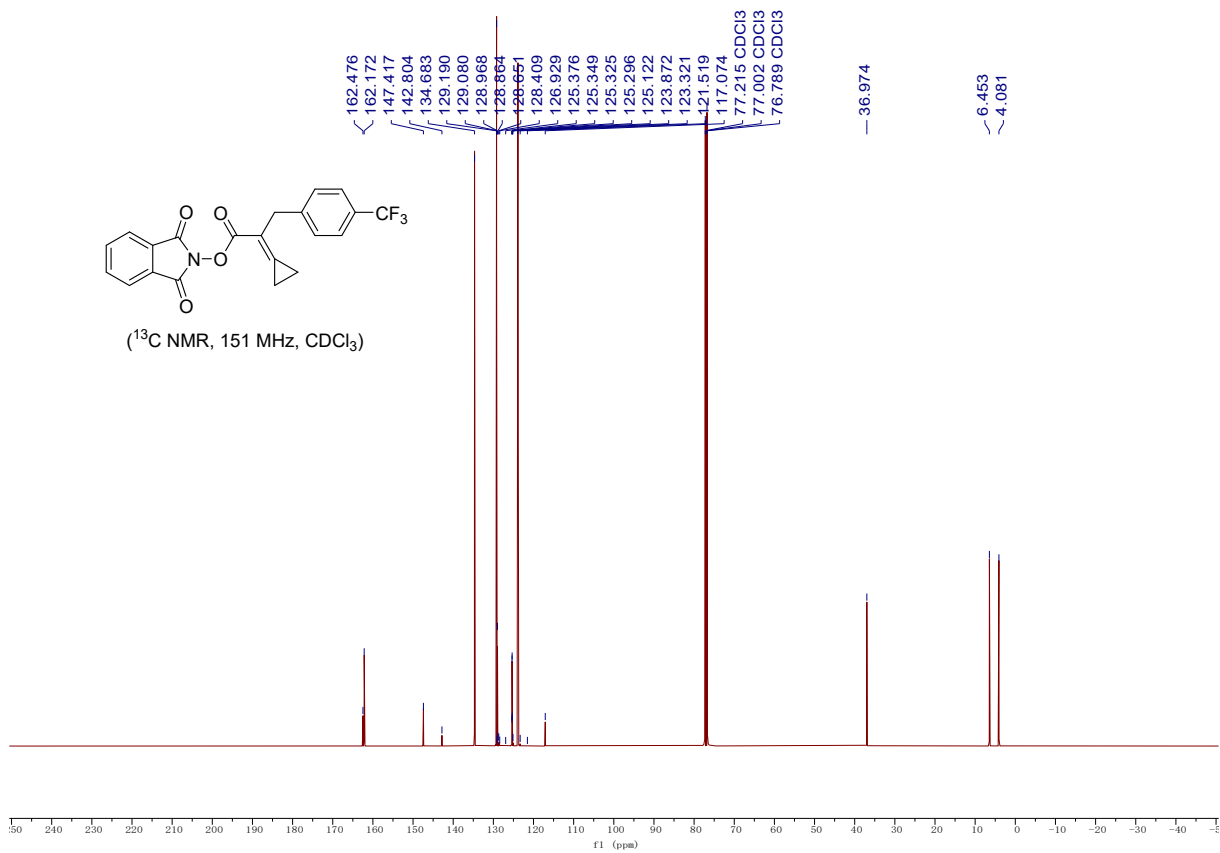

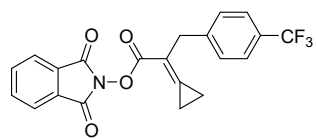

(<sup>19</sup>F NMR, 565 MHz, CDCl<sub>3</sub>)

-62.356

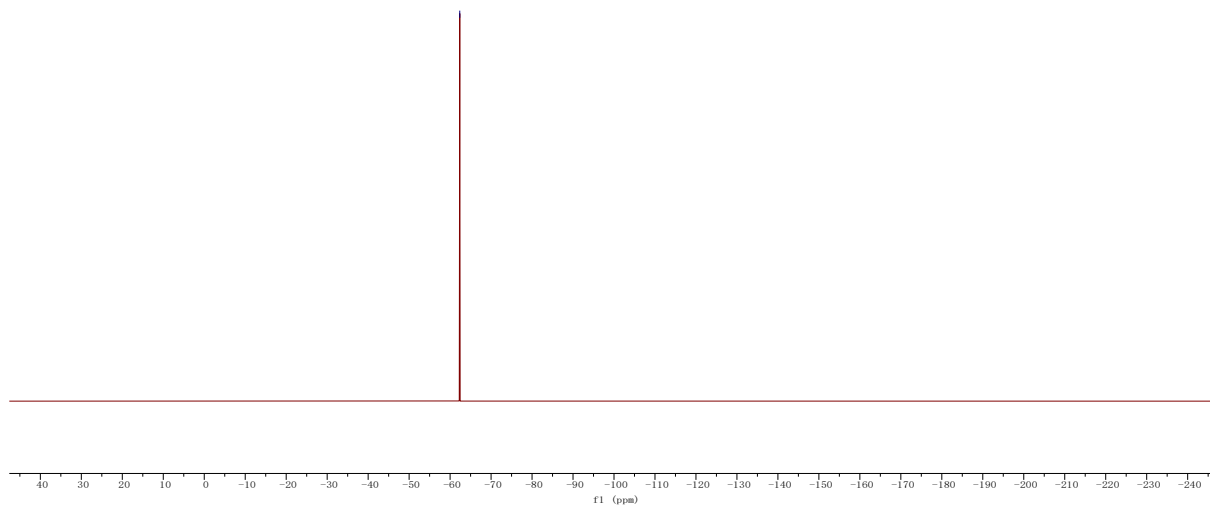



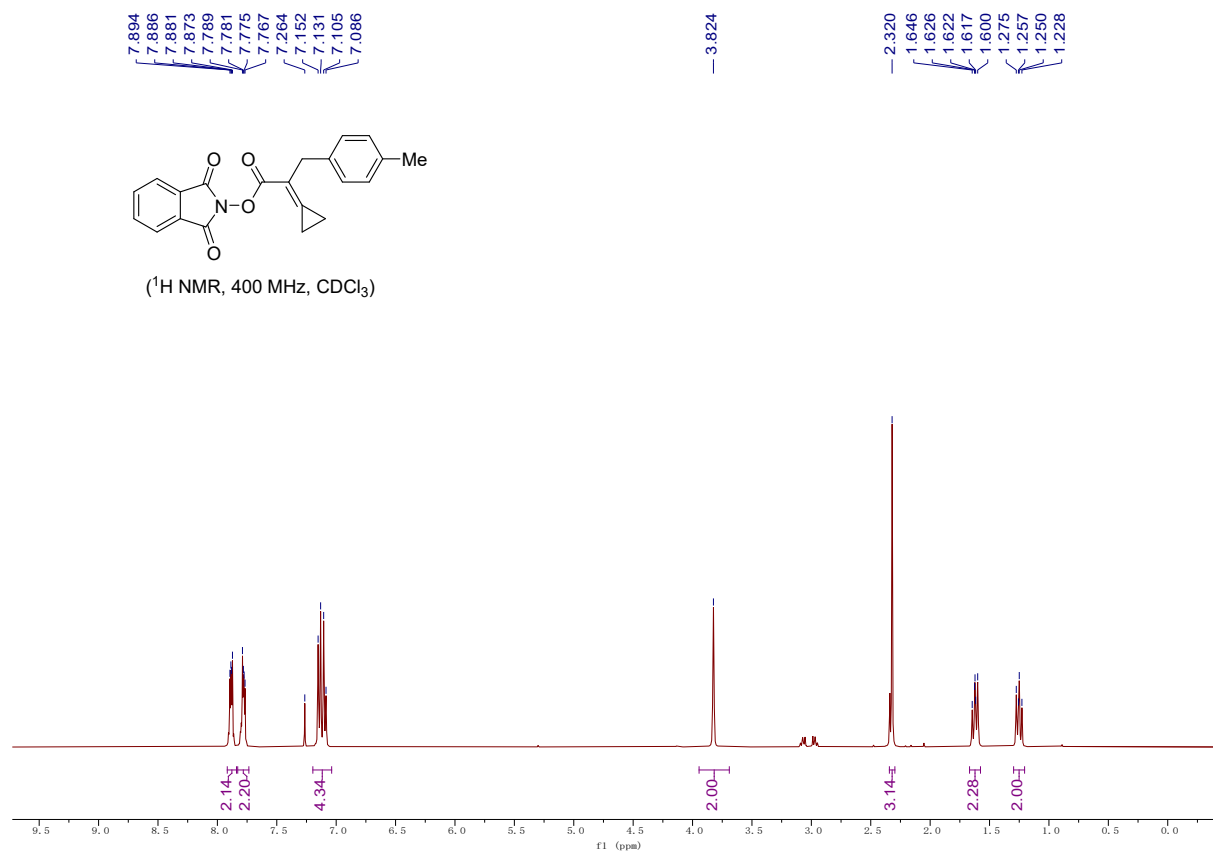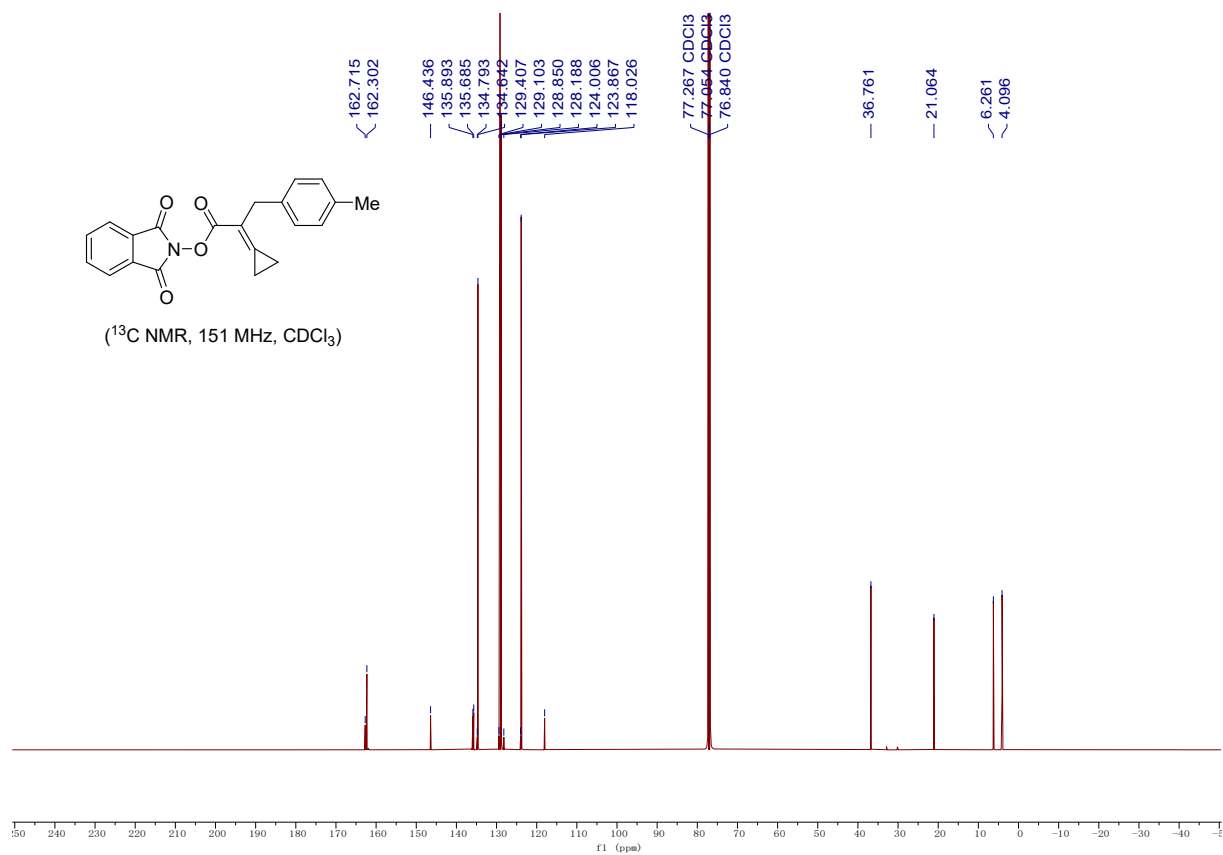

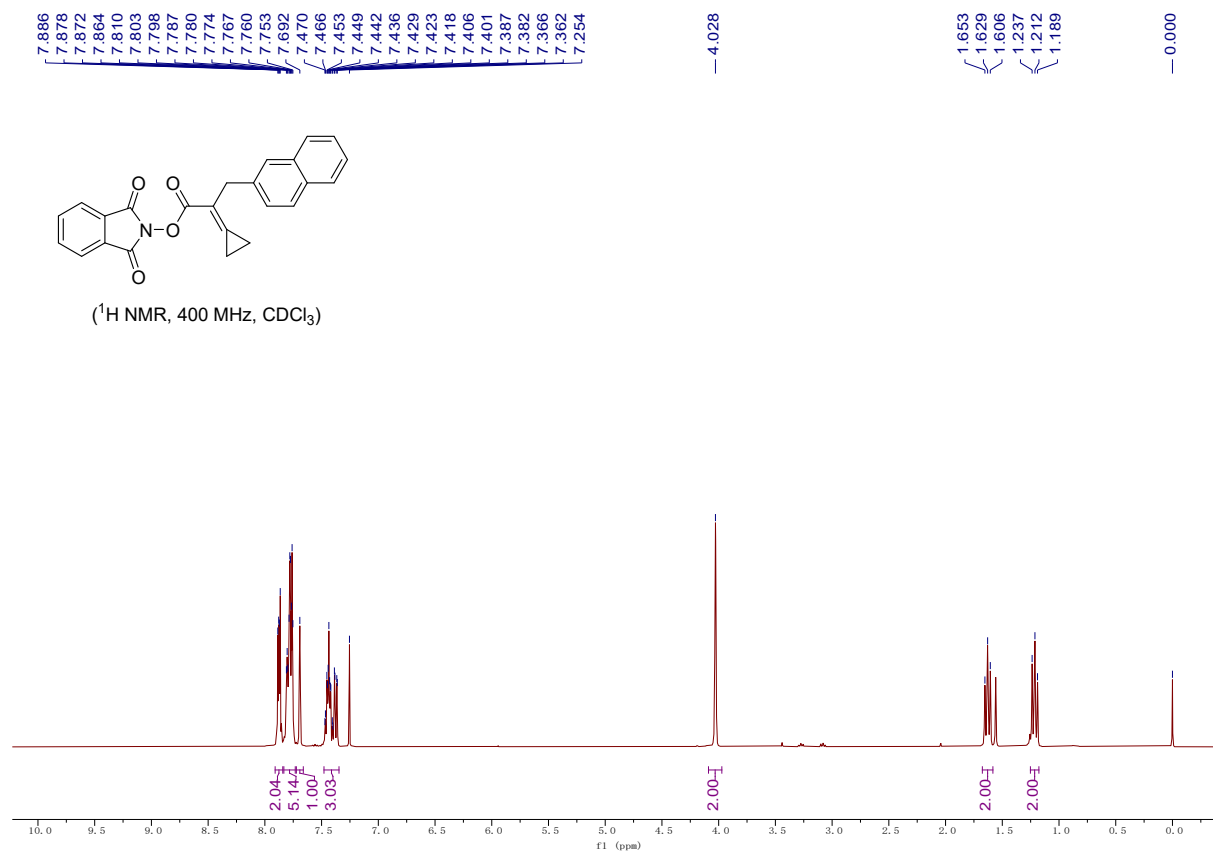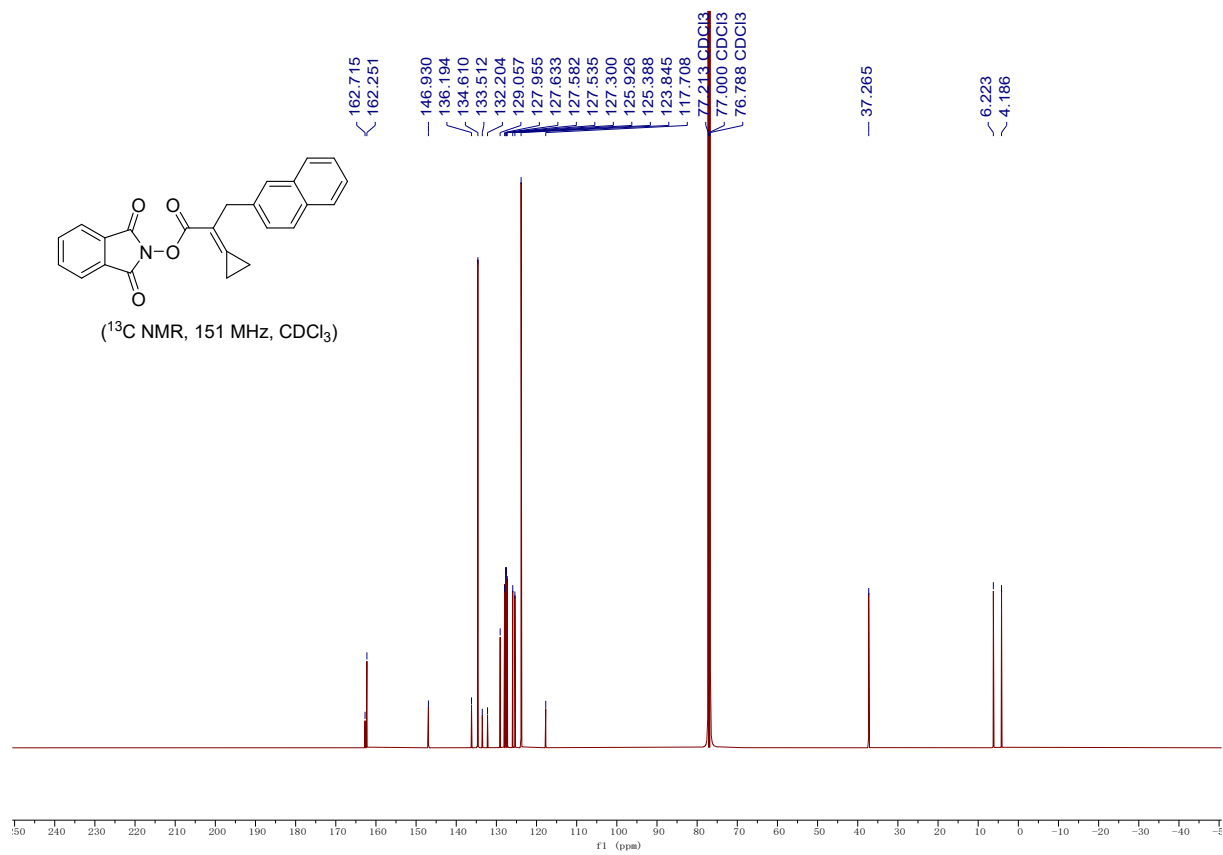

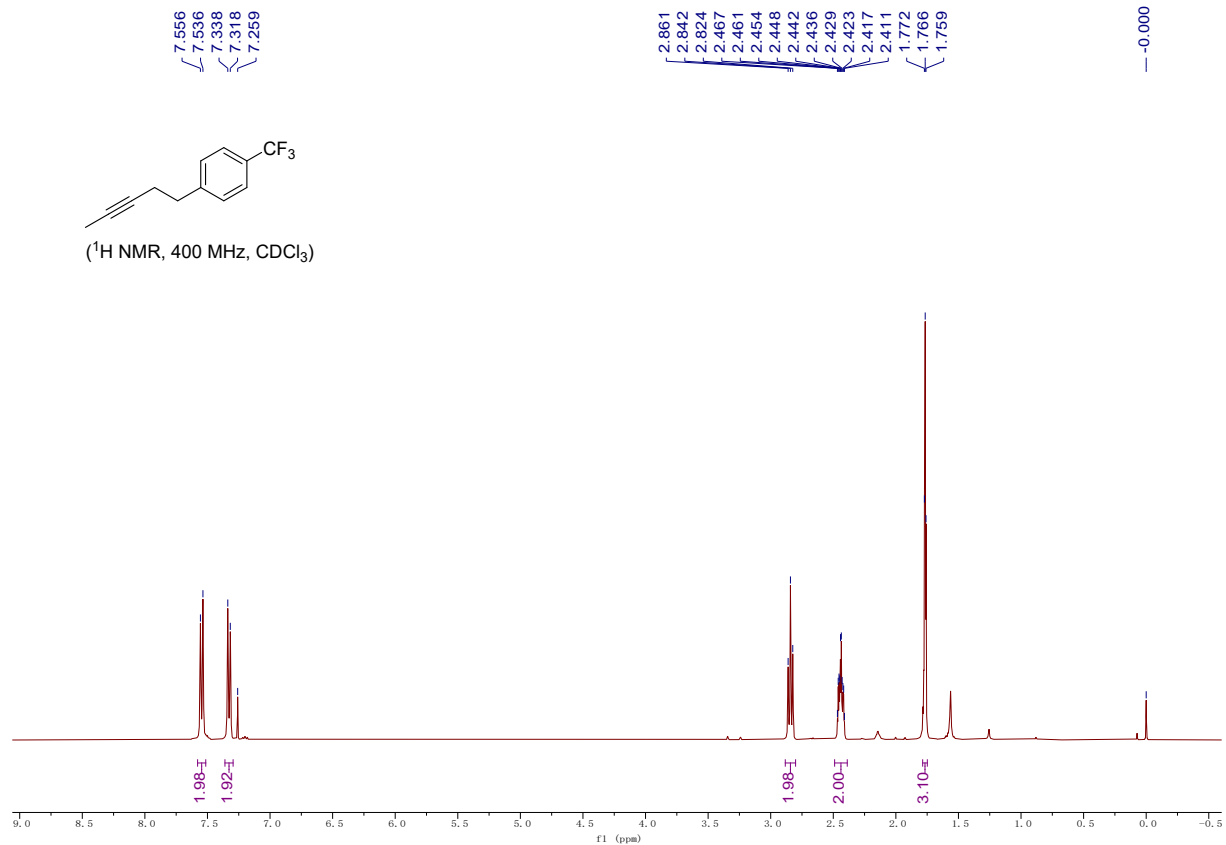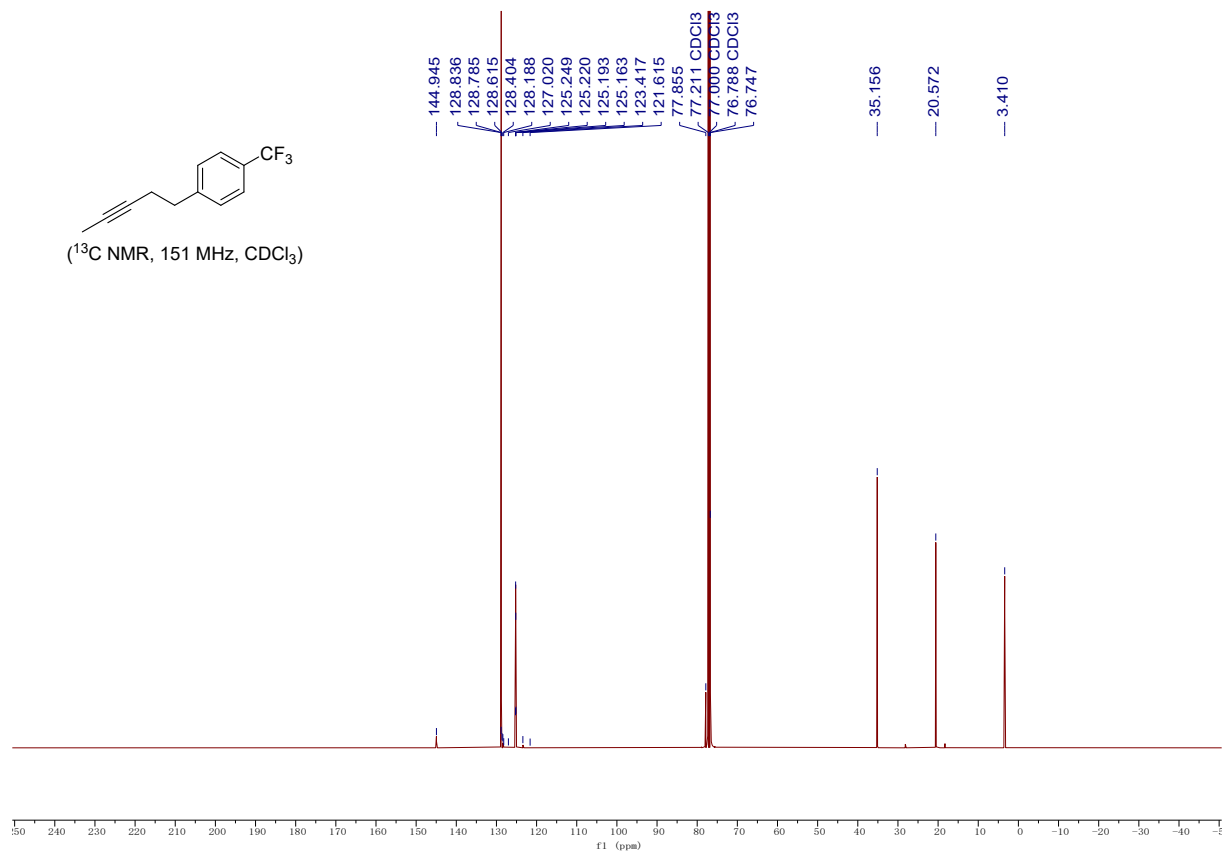

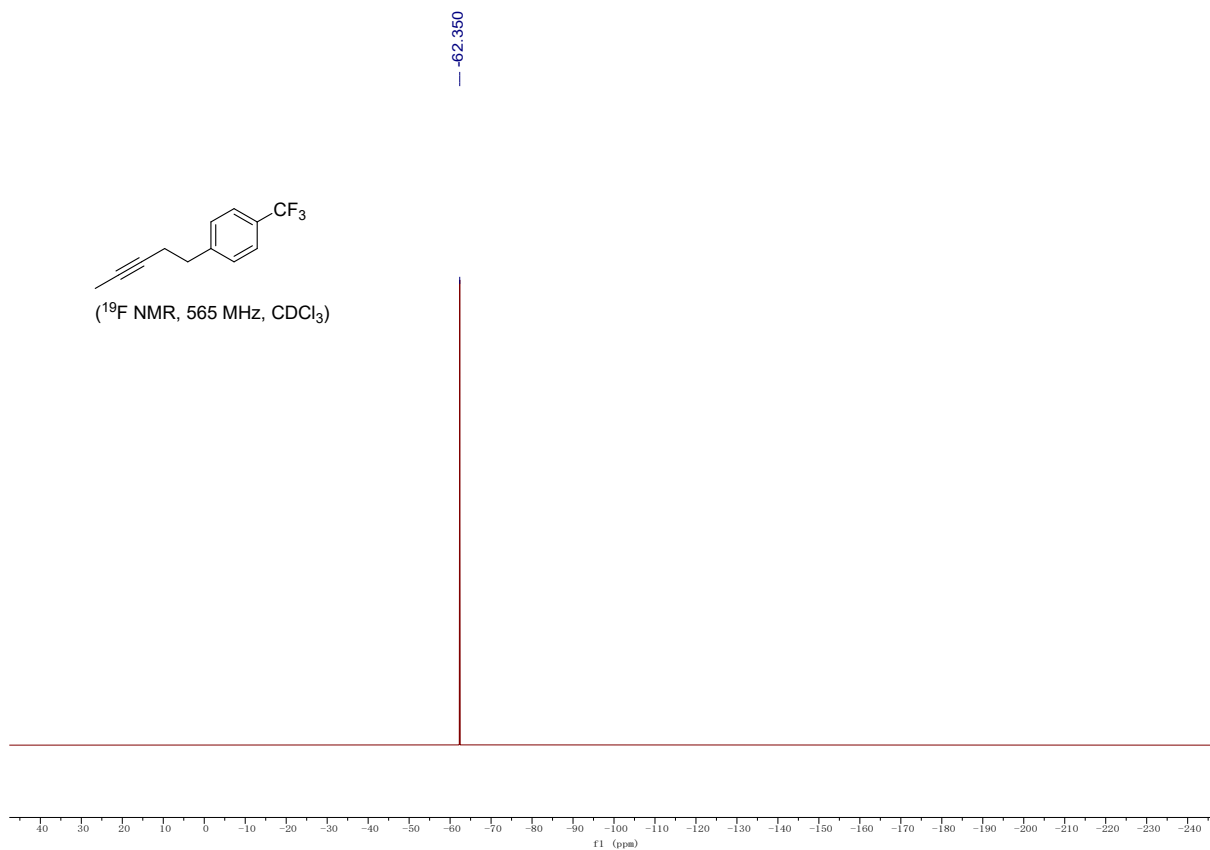

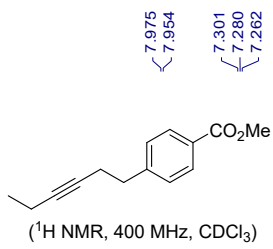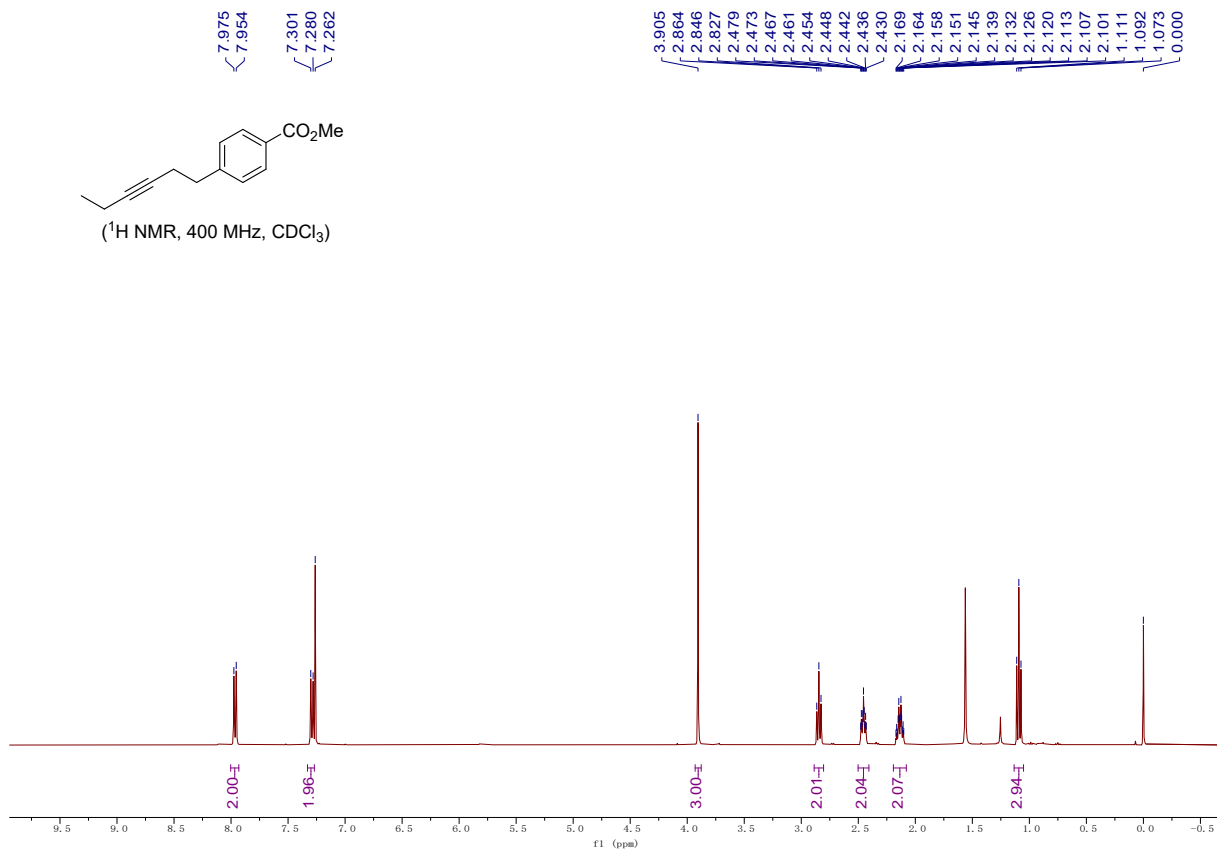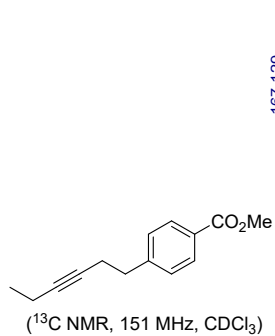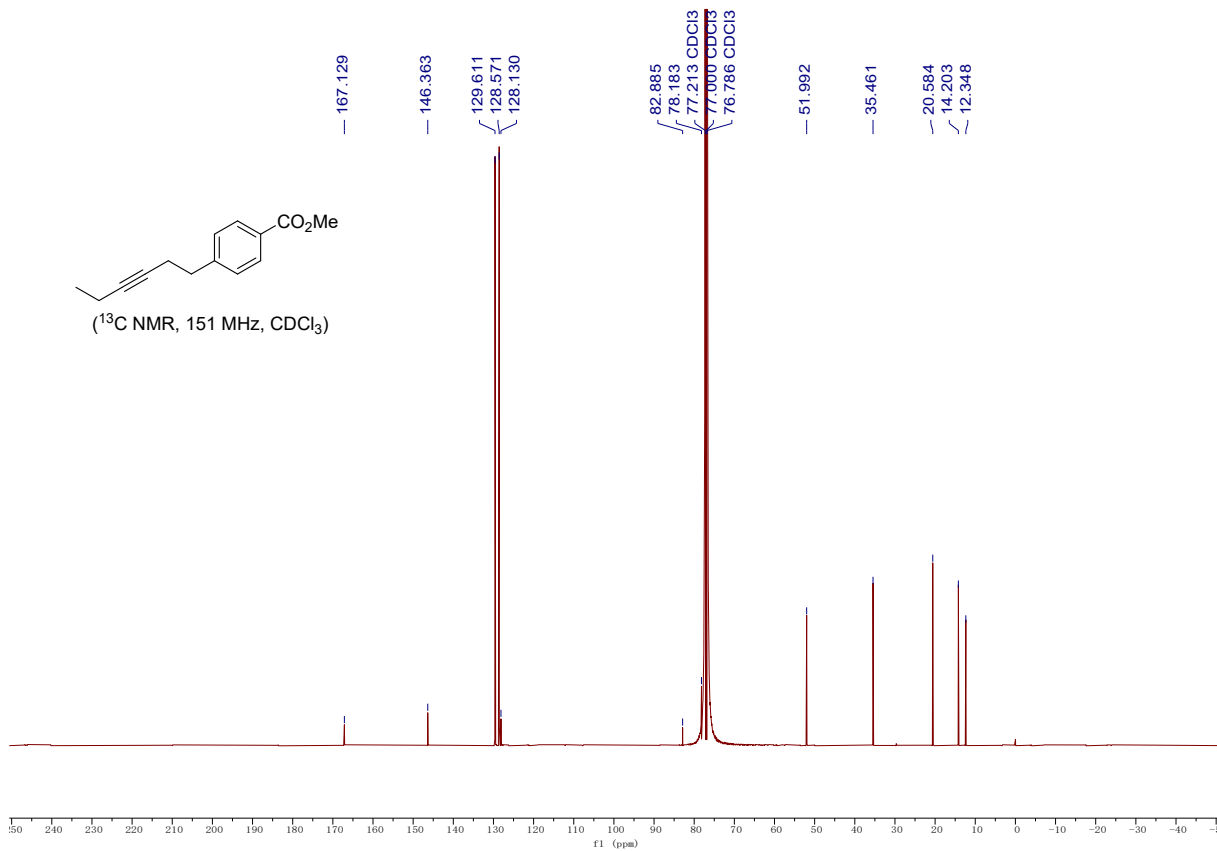



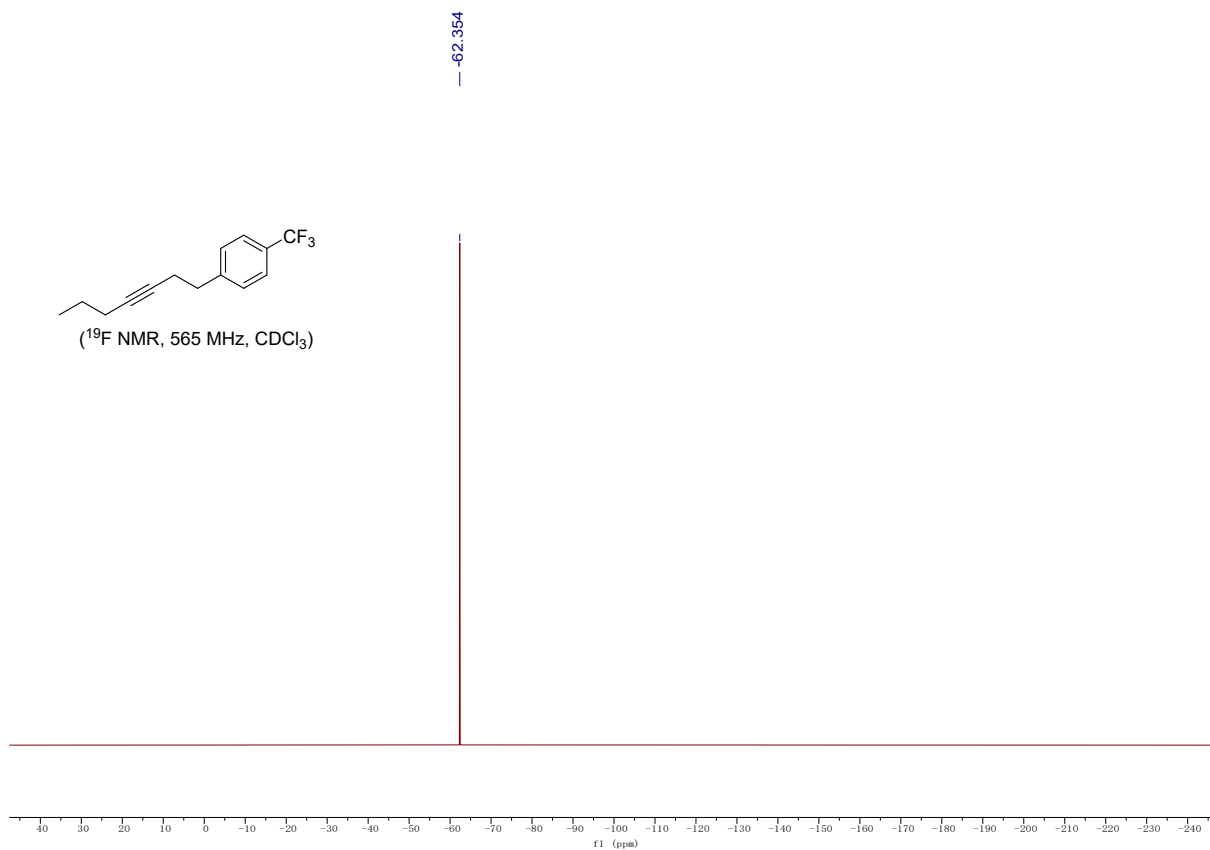

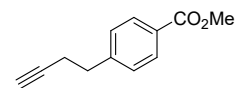

(<sup>1</sup>H NMR, 400 MHz, CDCl<sub>3</sub>)

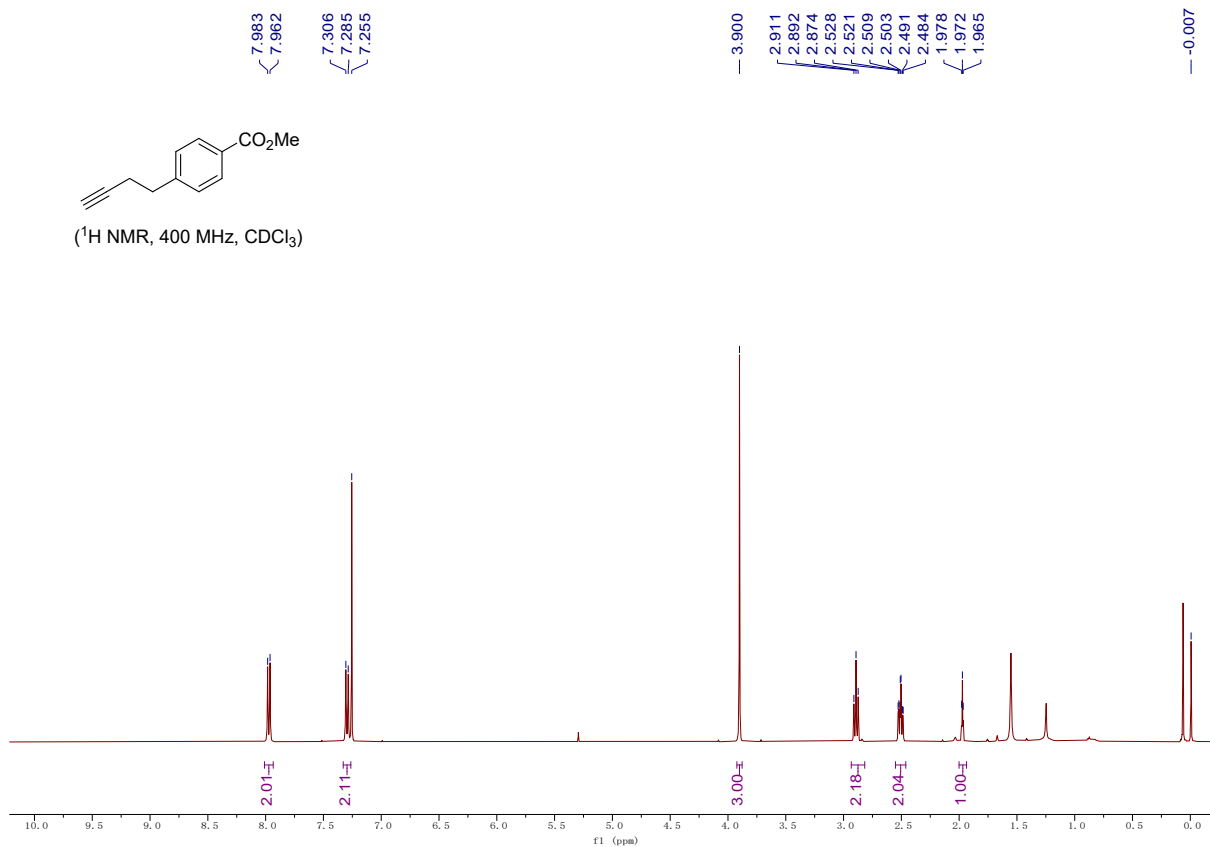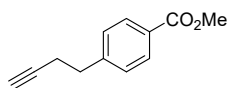

(<sup>13</sup>C NMR, 151 MHz, CDCl<sub>3</sub>)

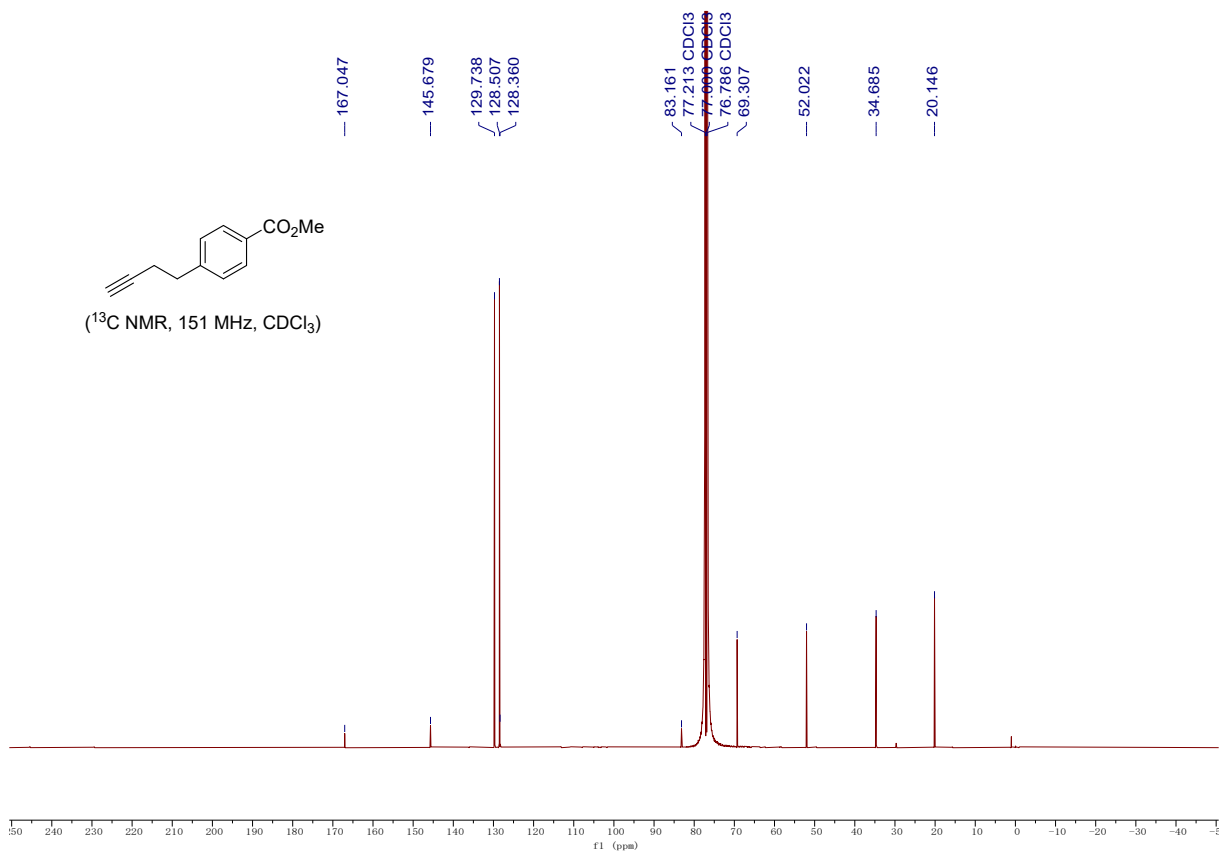



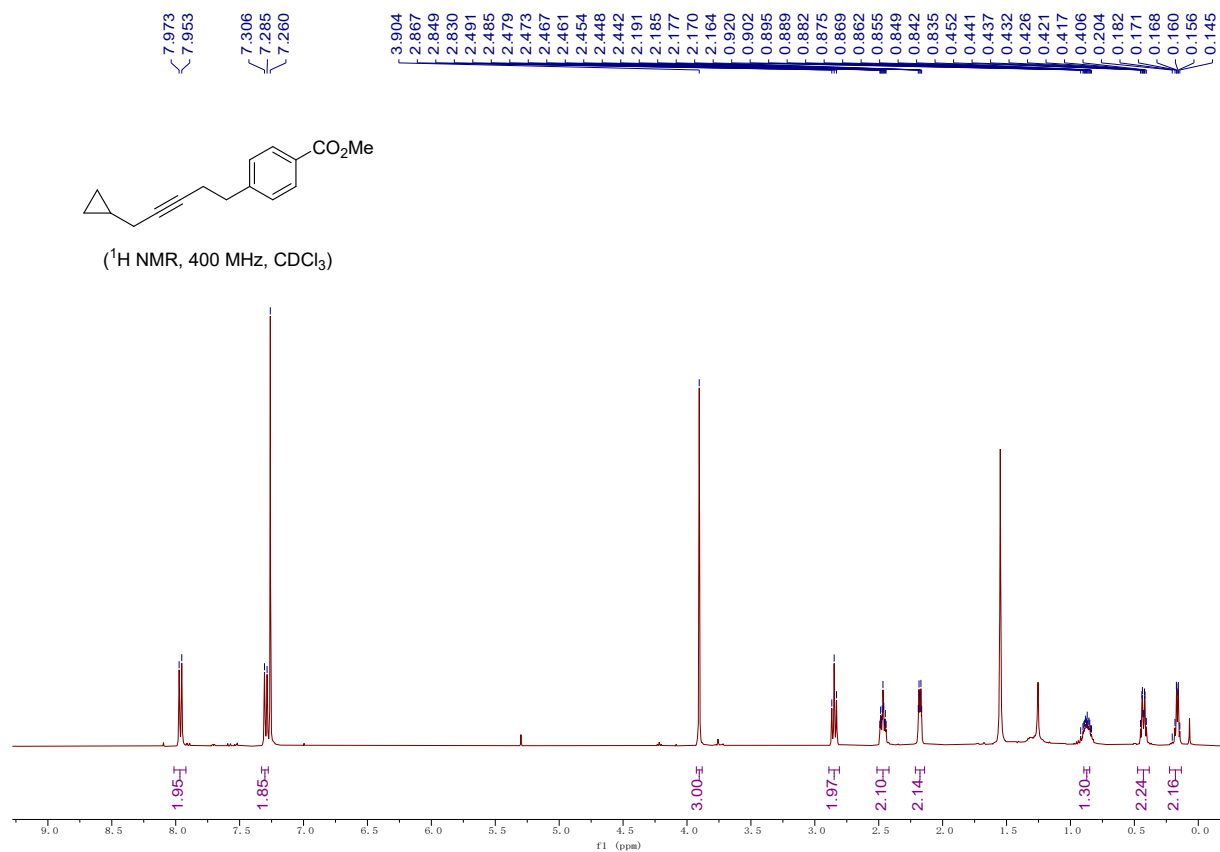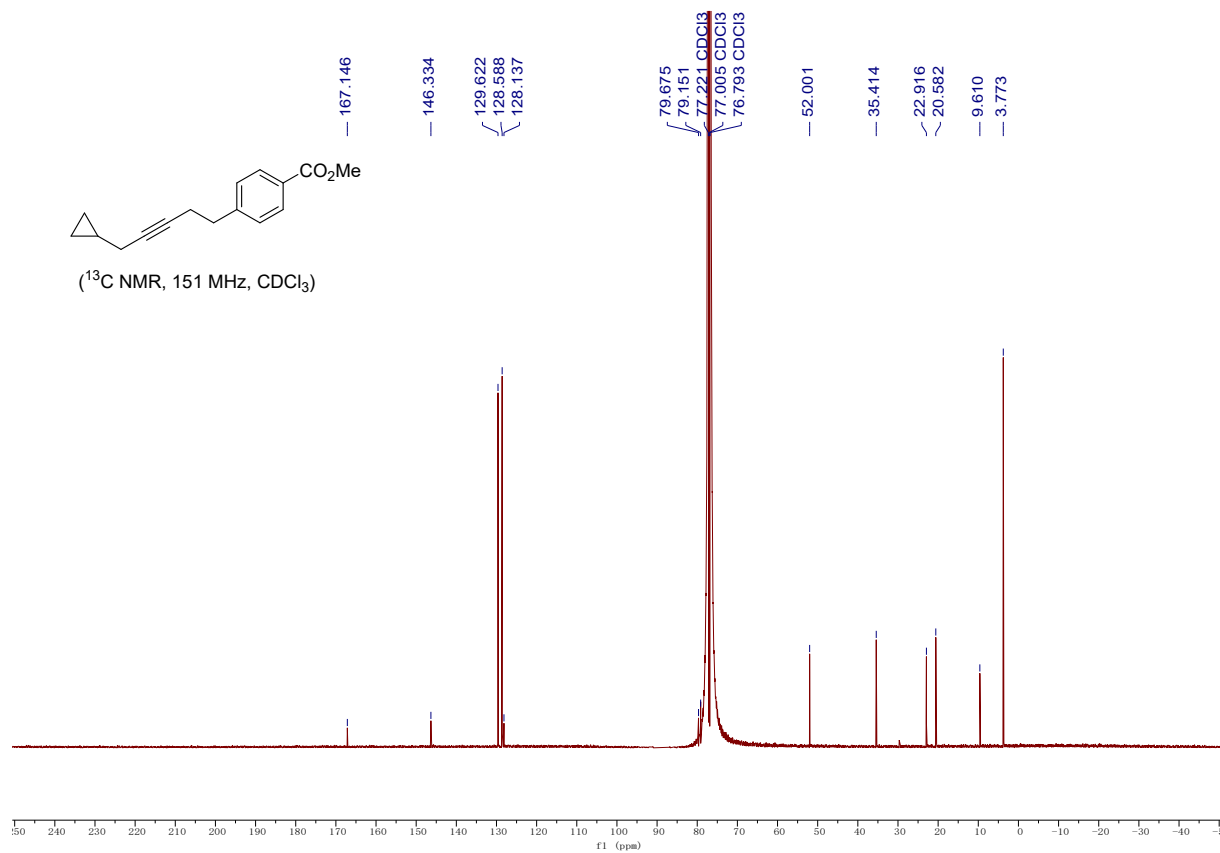

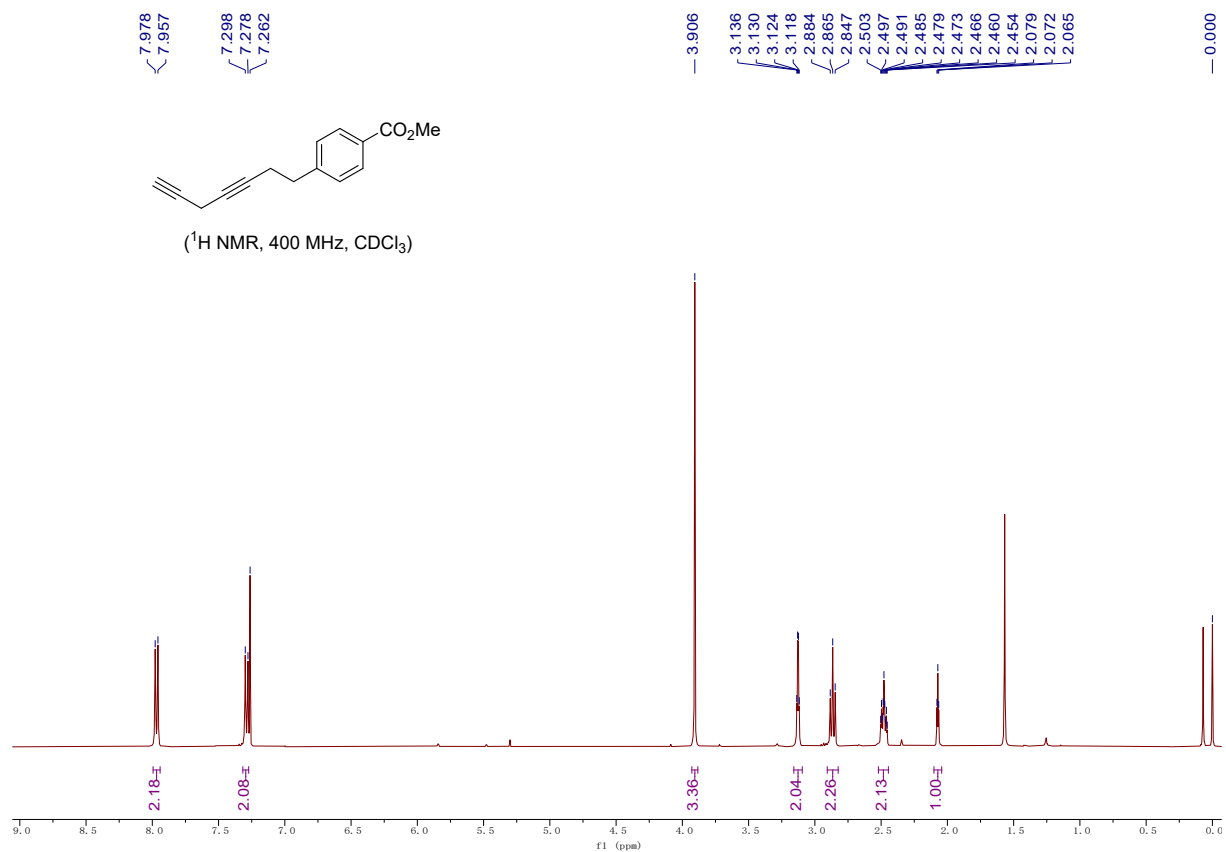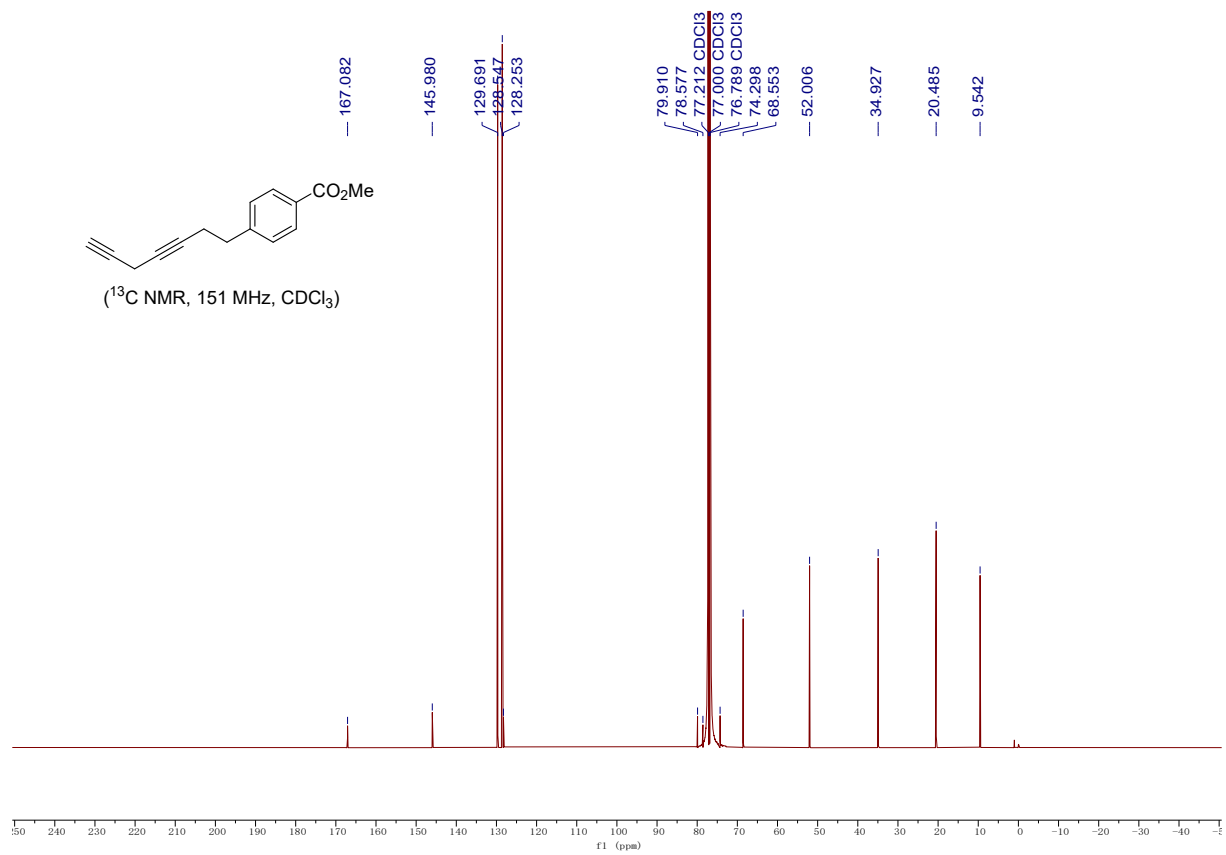

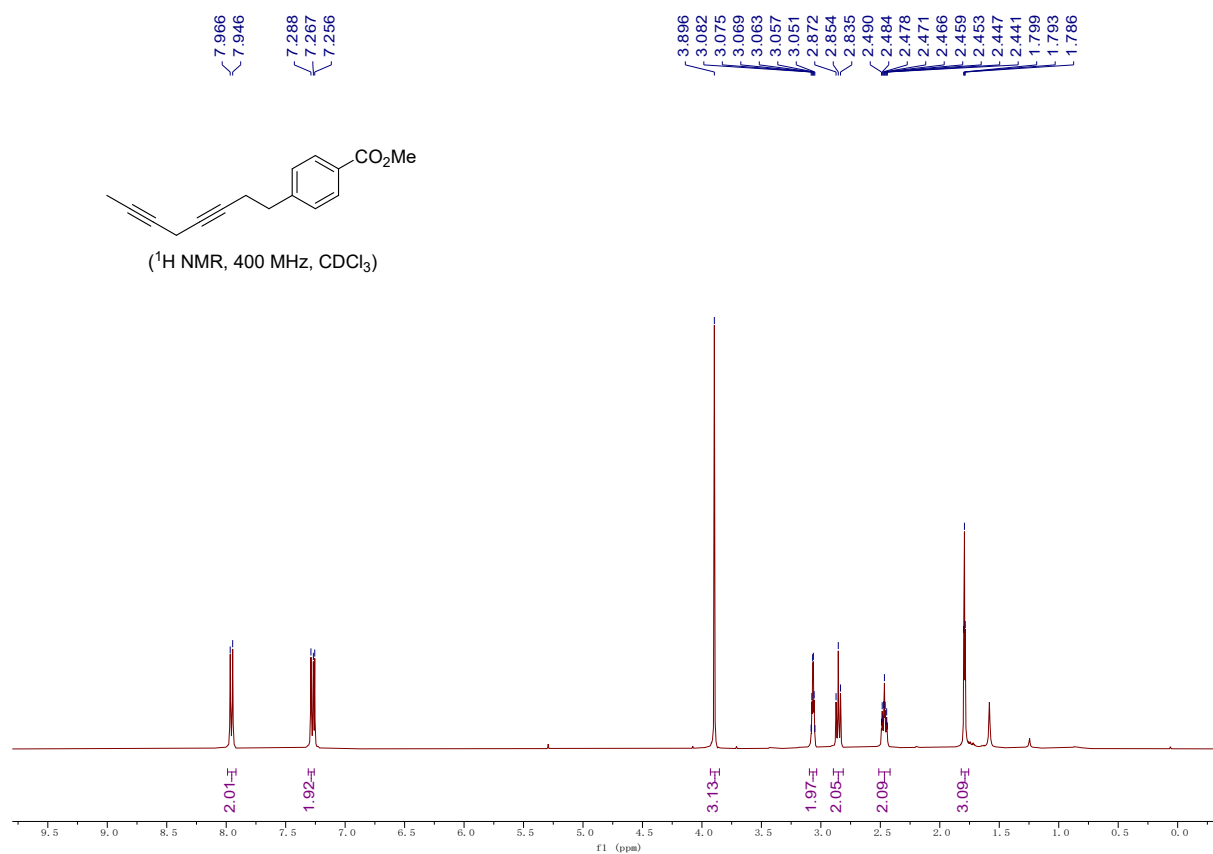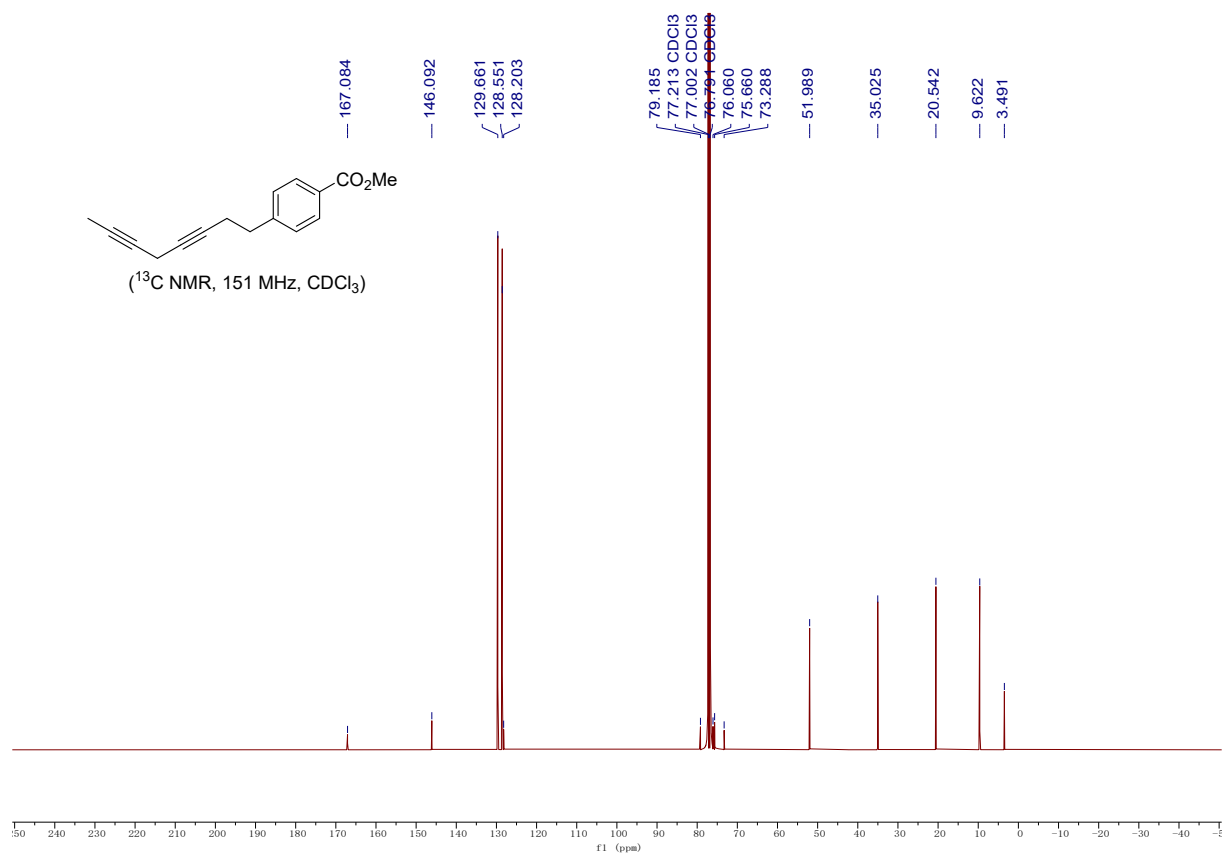

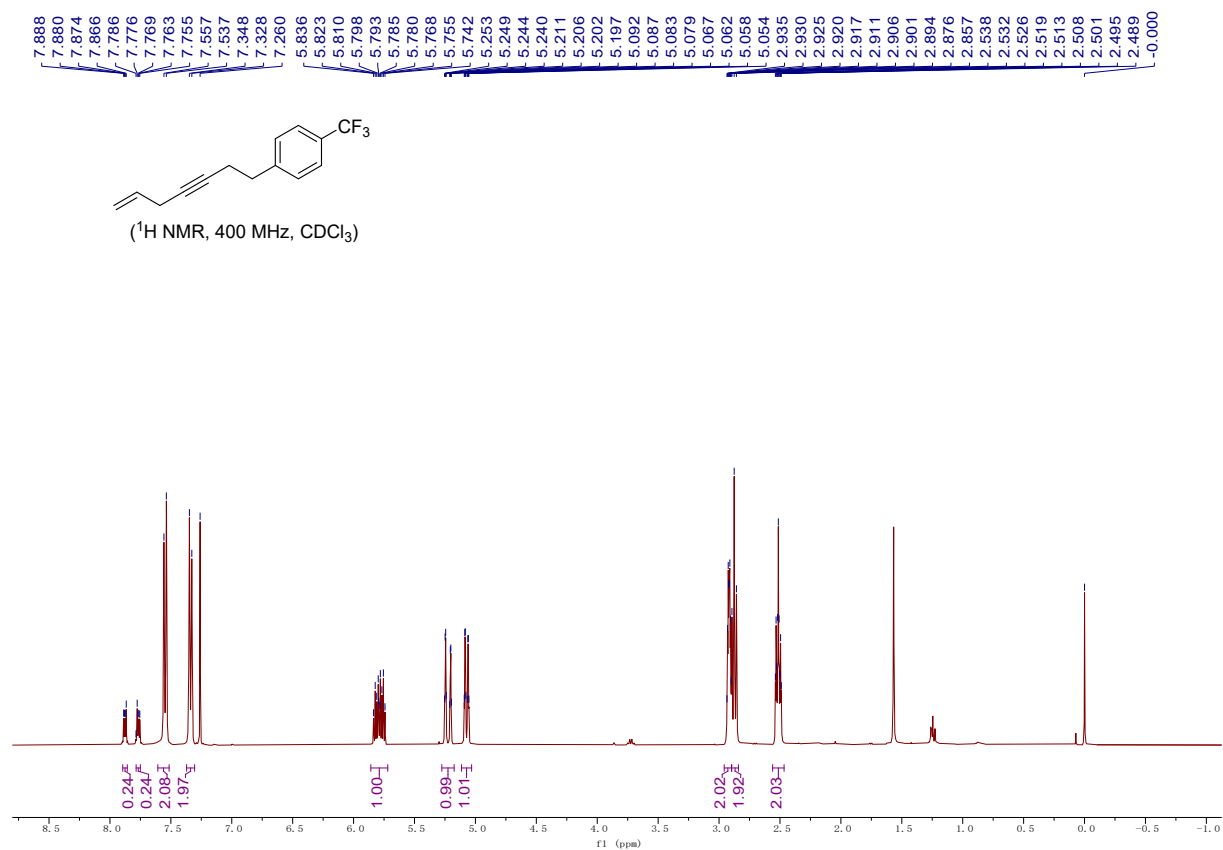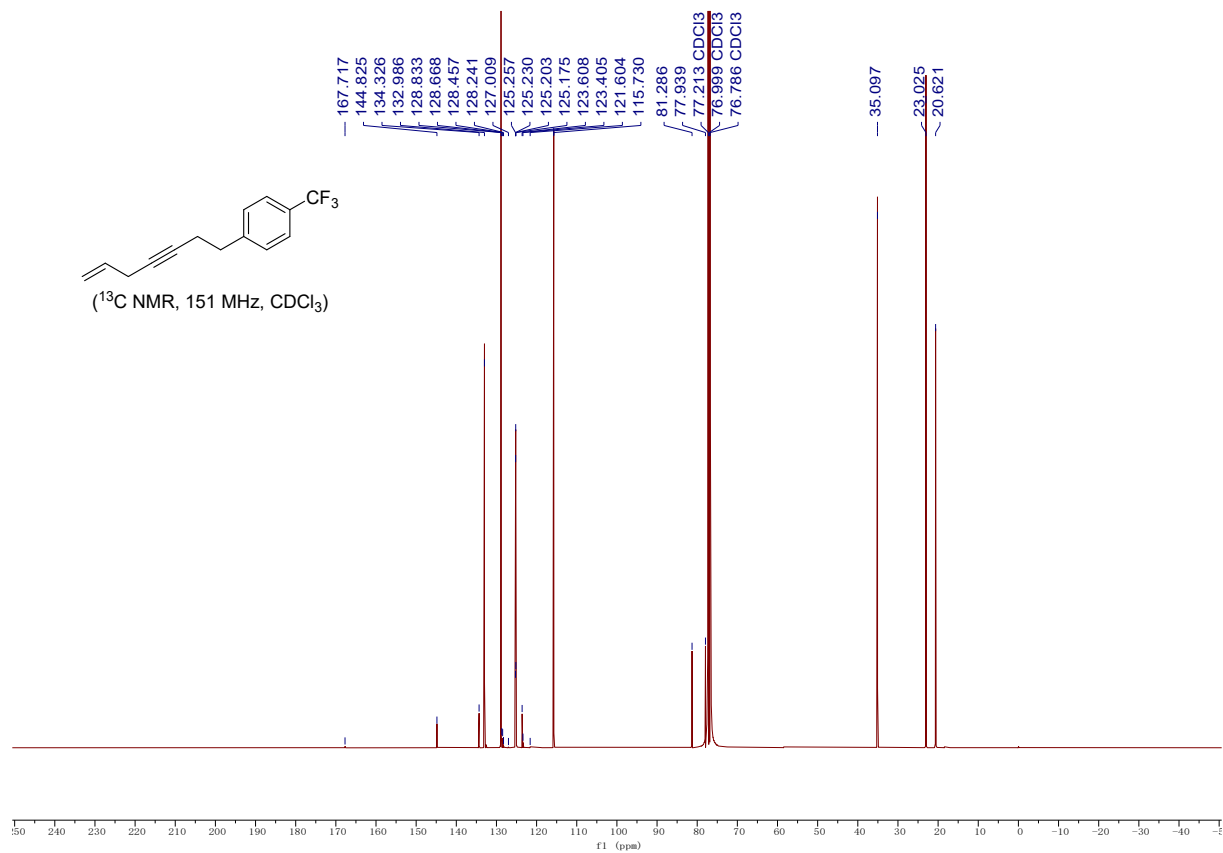

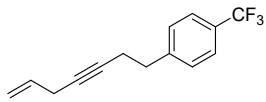

(<sup>19</sup>F NMR, 565 MHz, CDCl<sub>3</sub>)

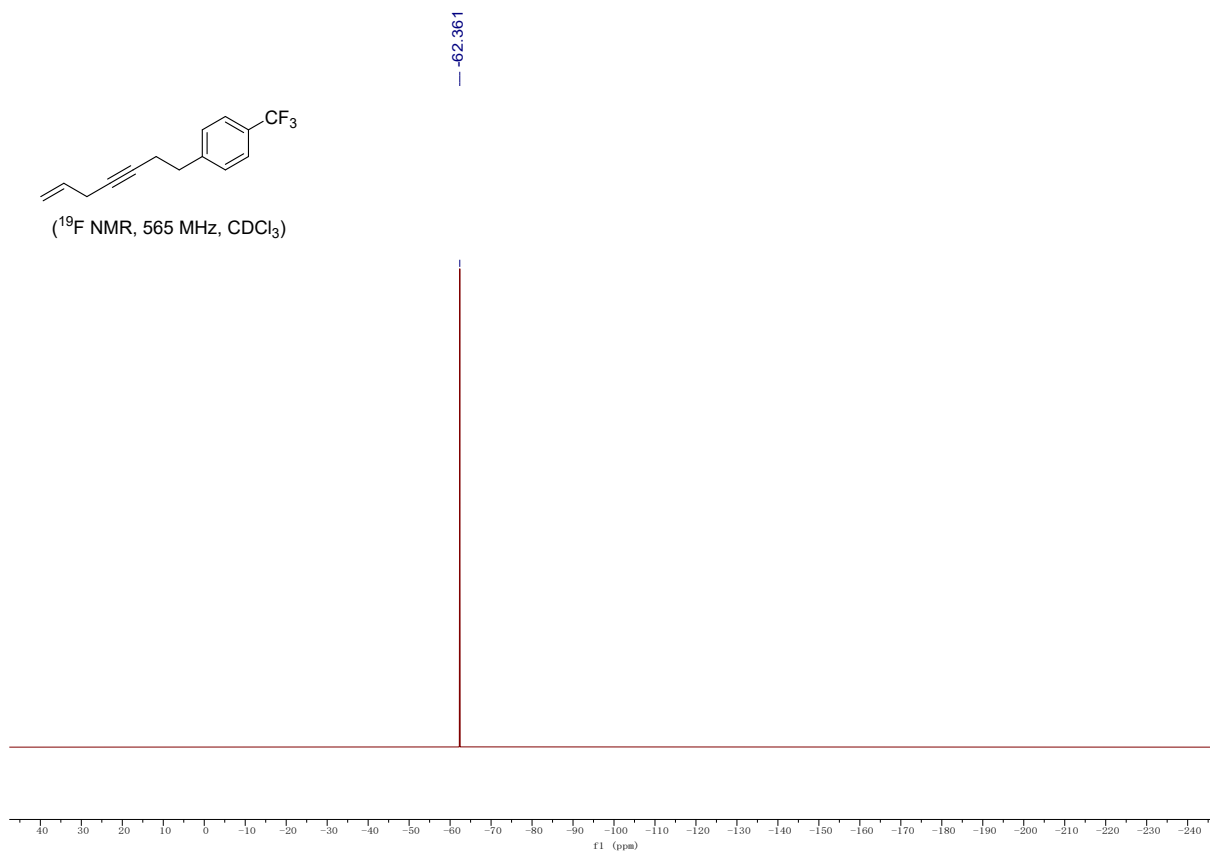

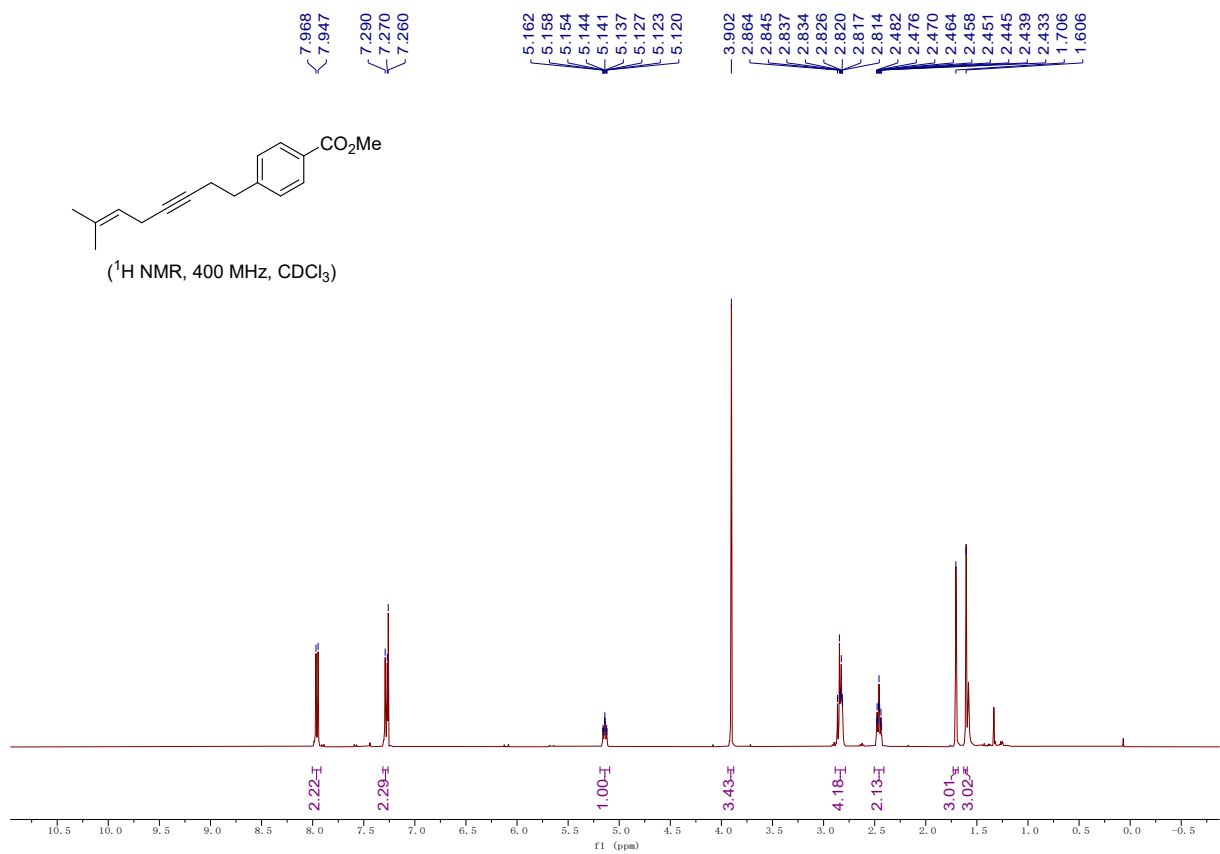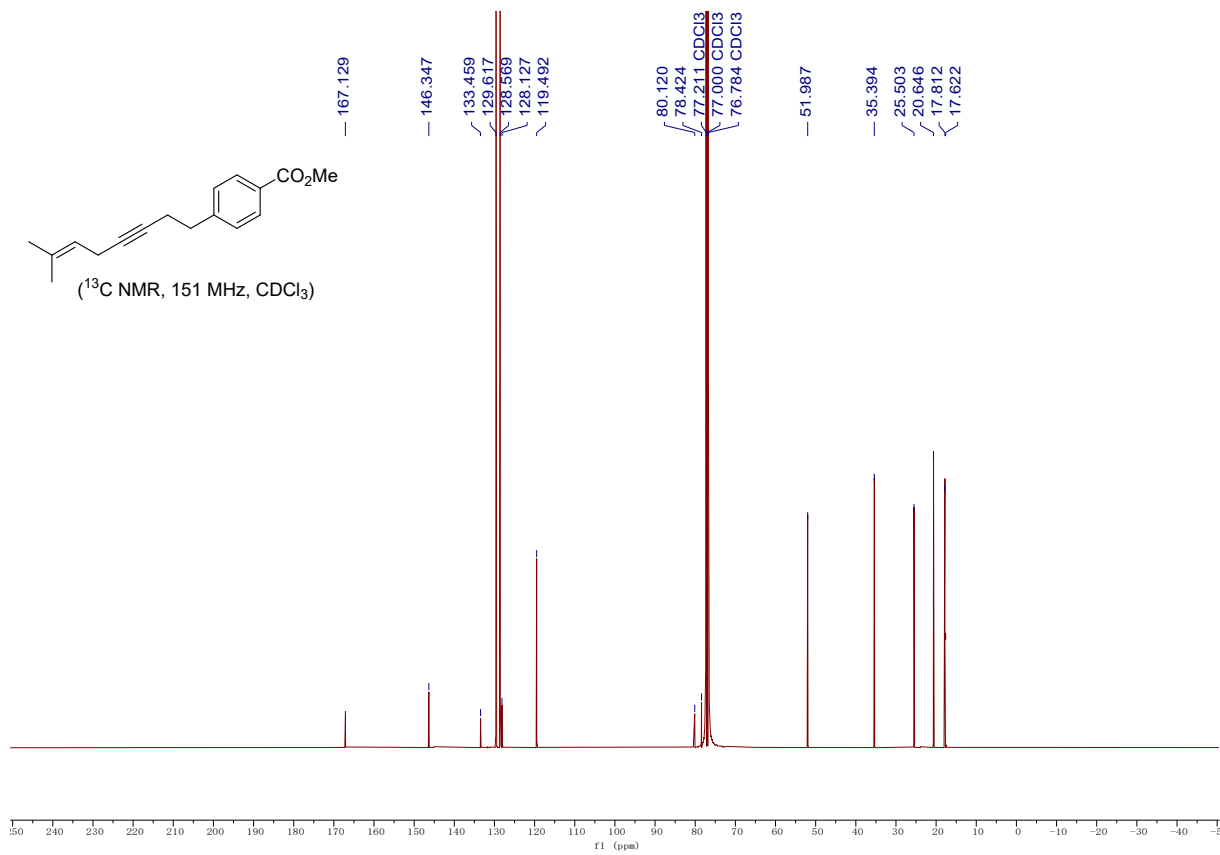

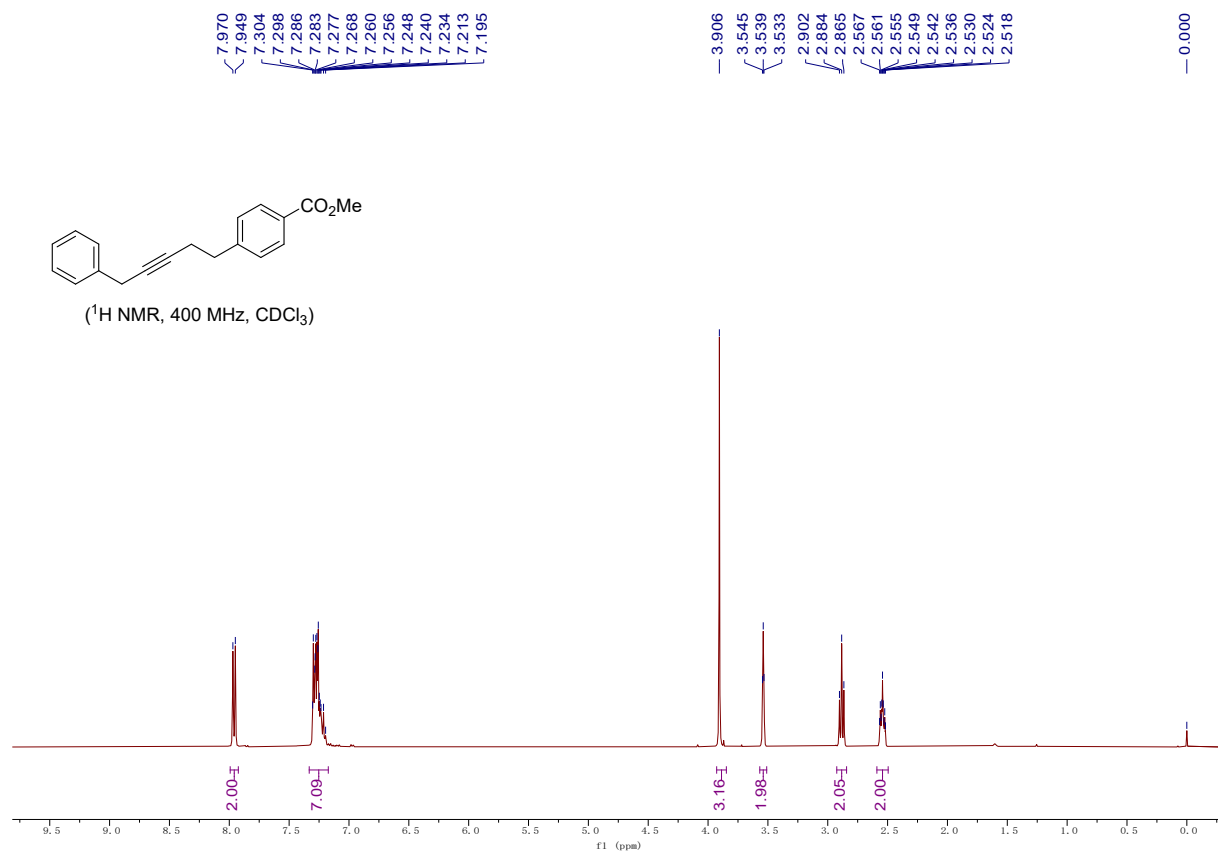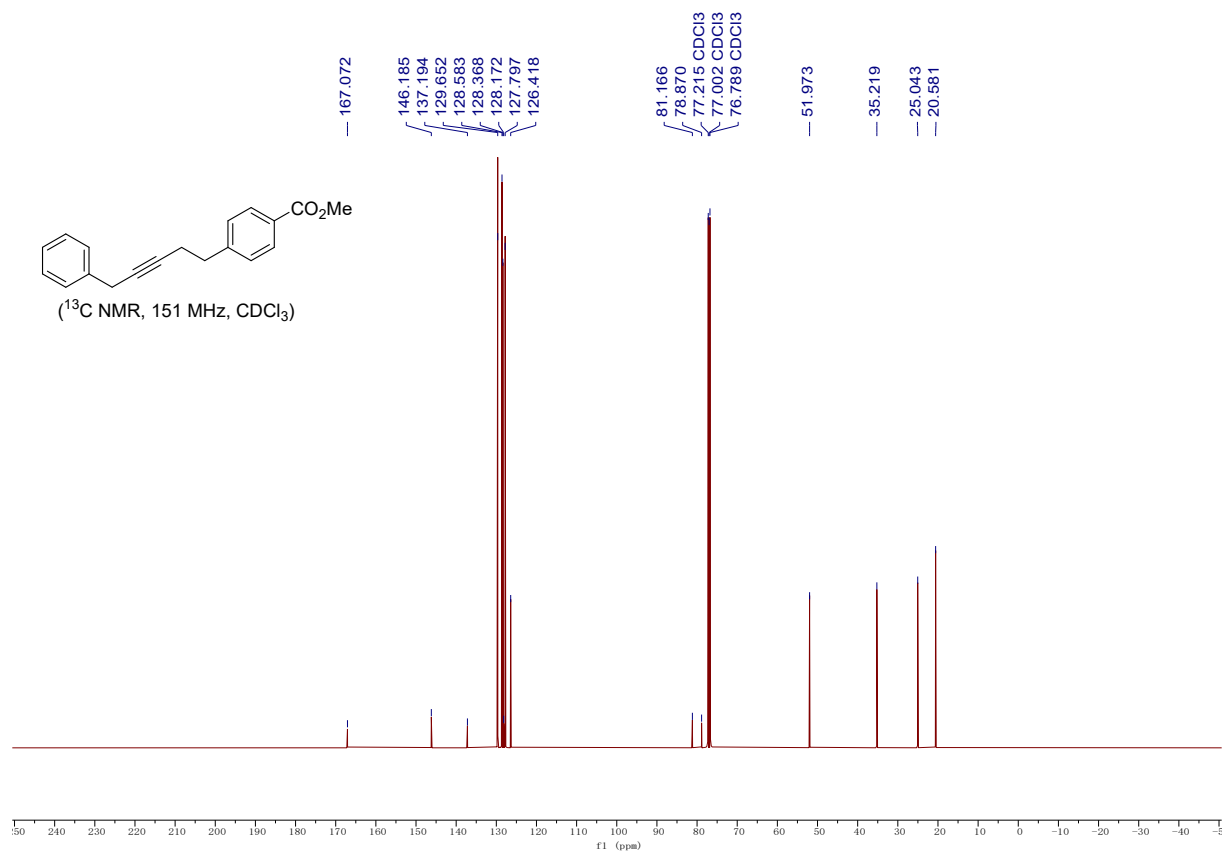

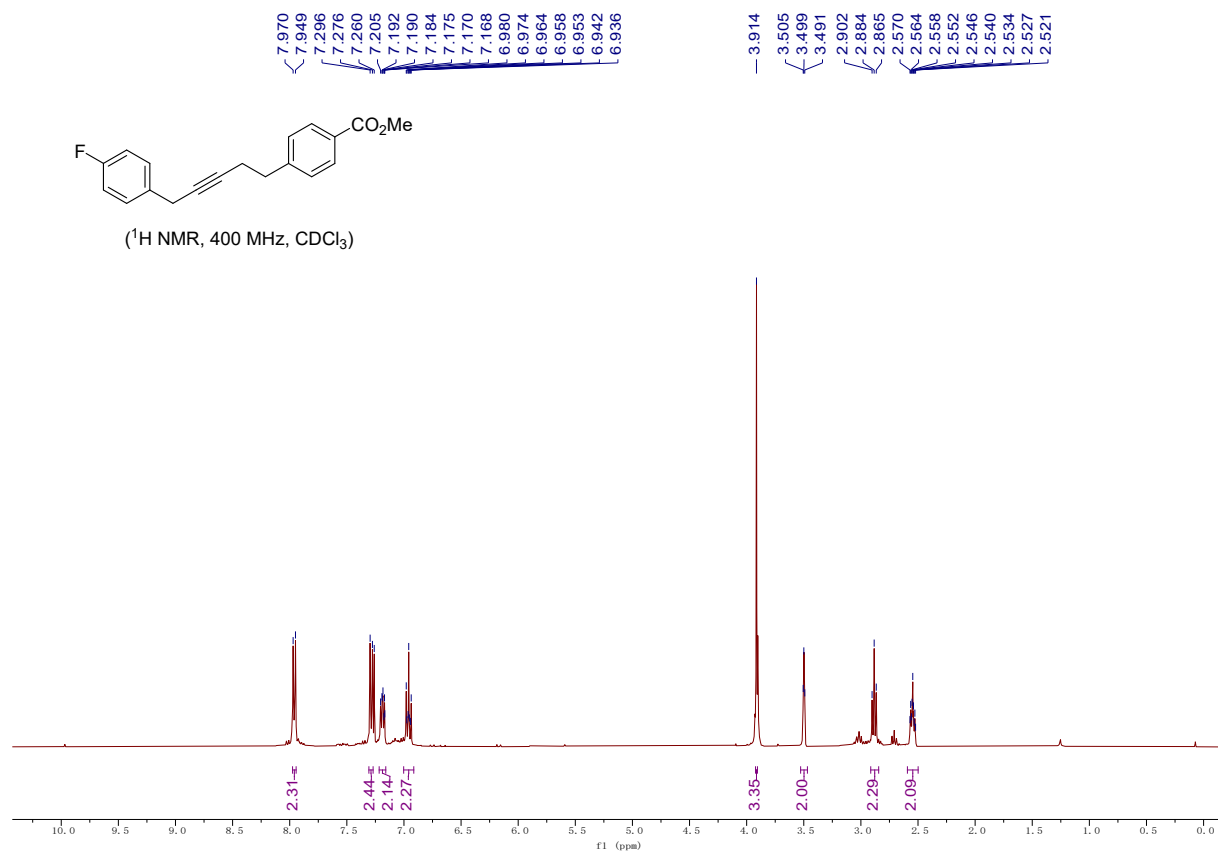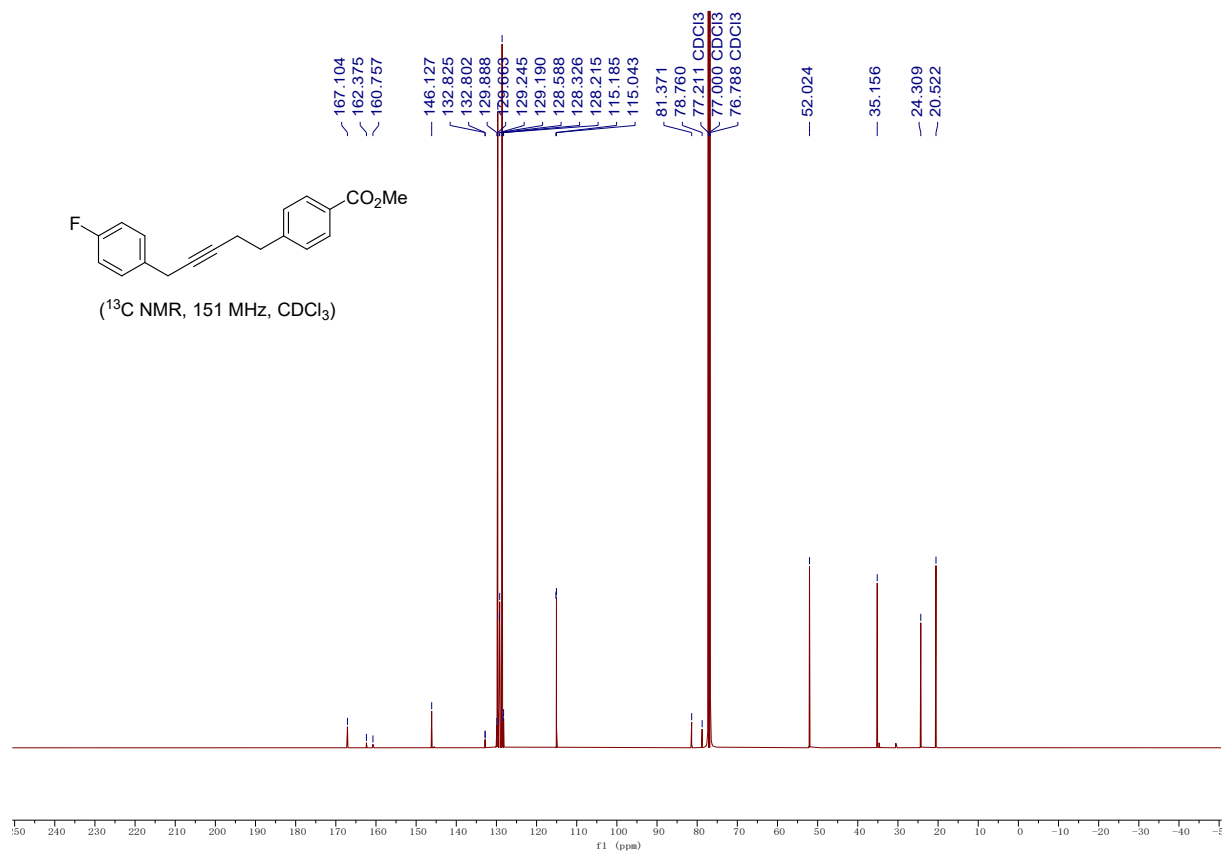



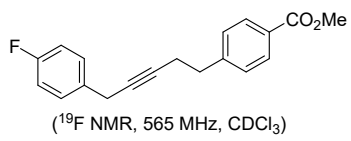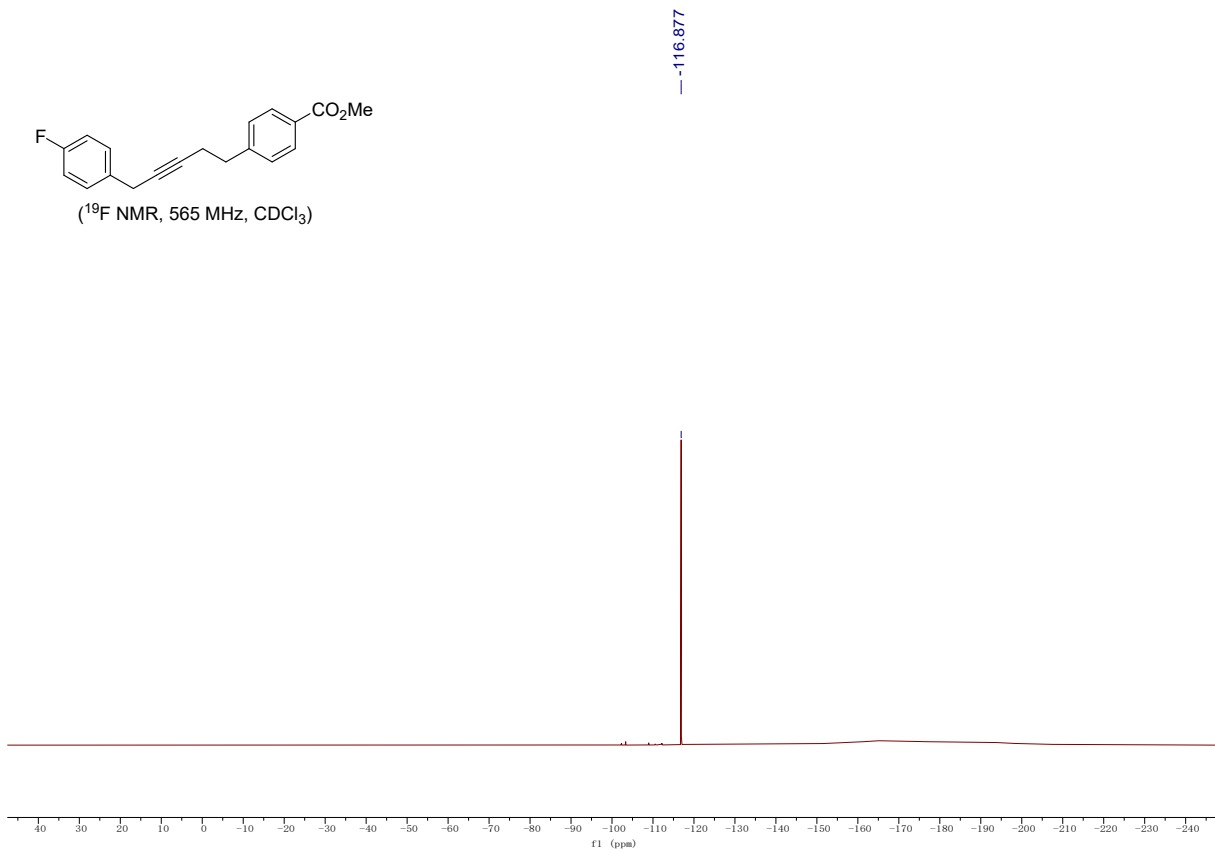

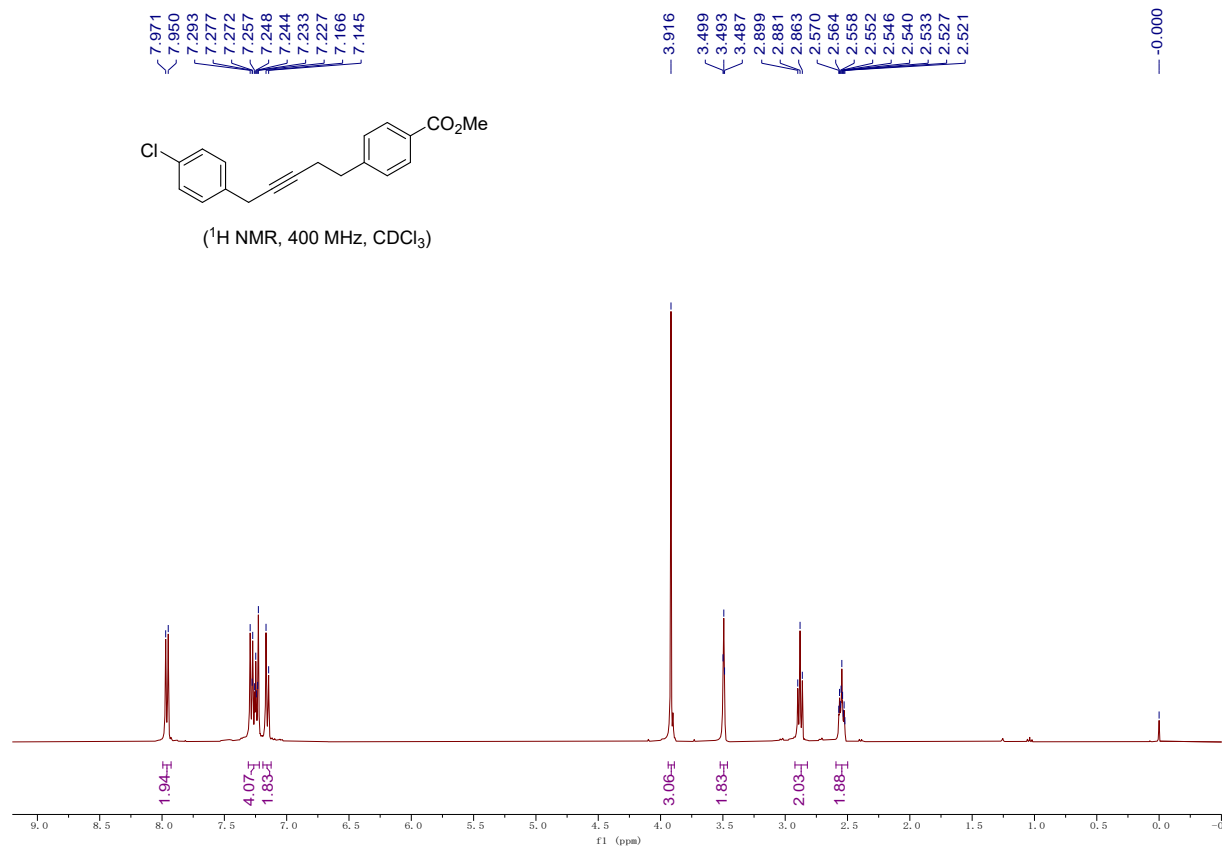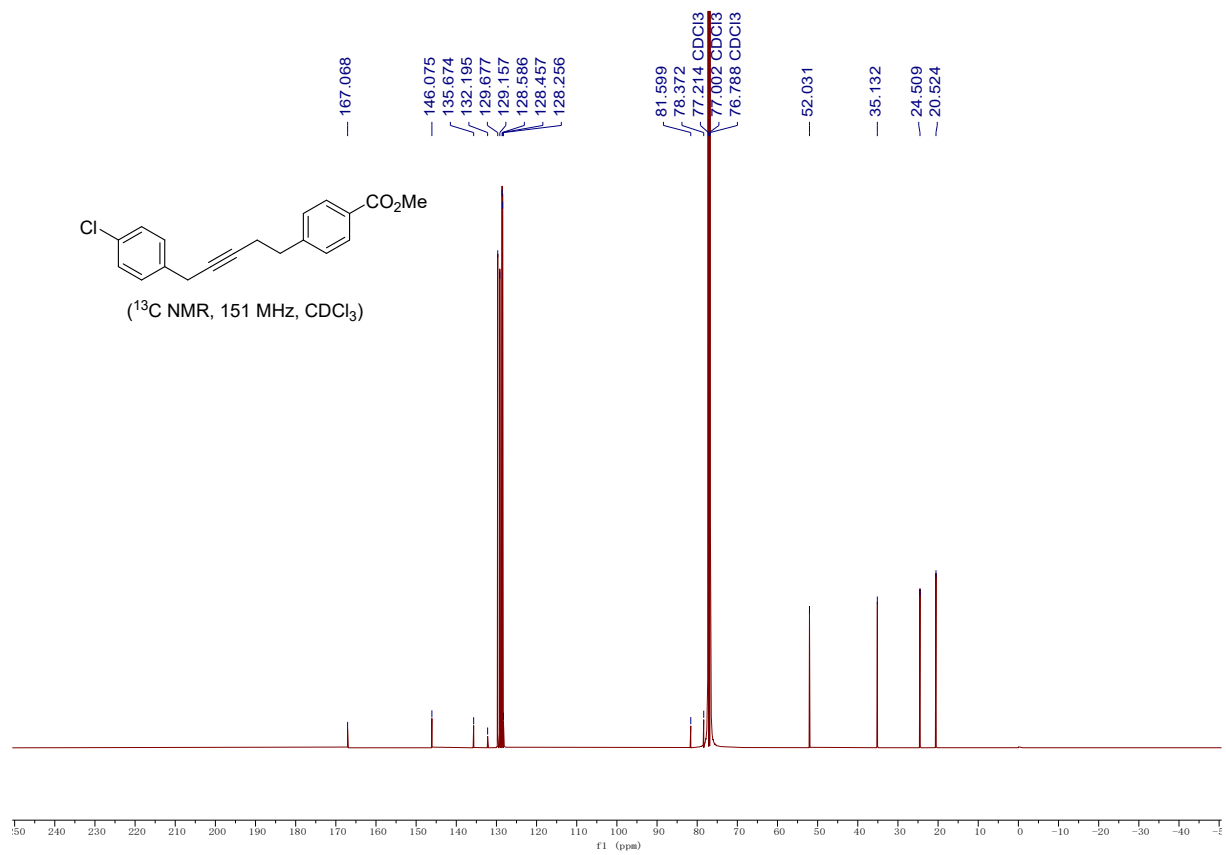

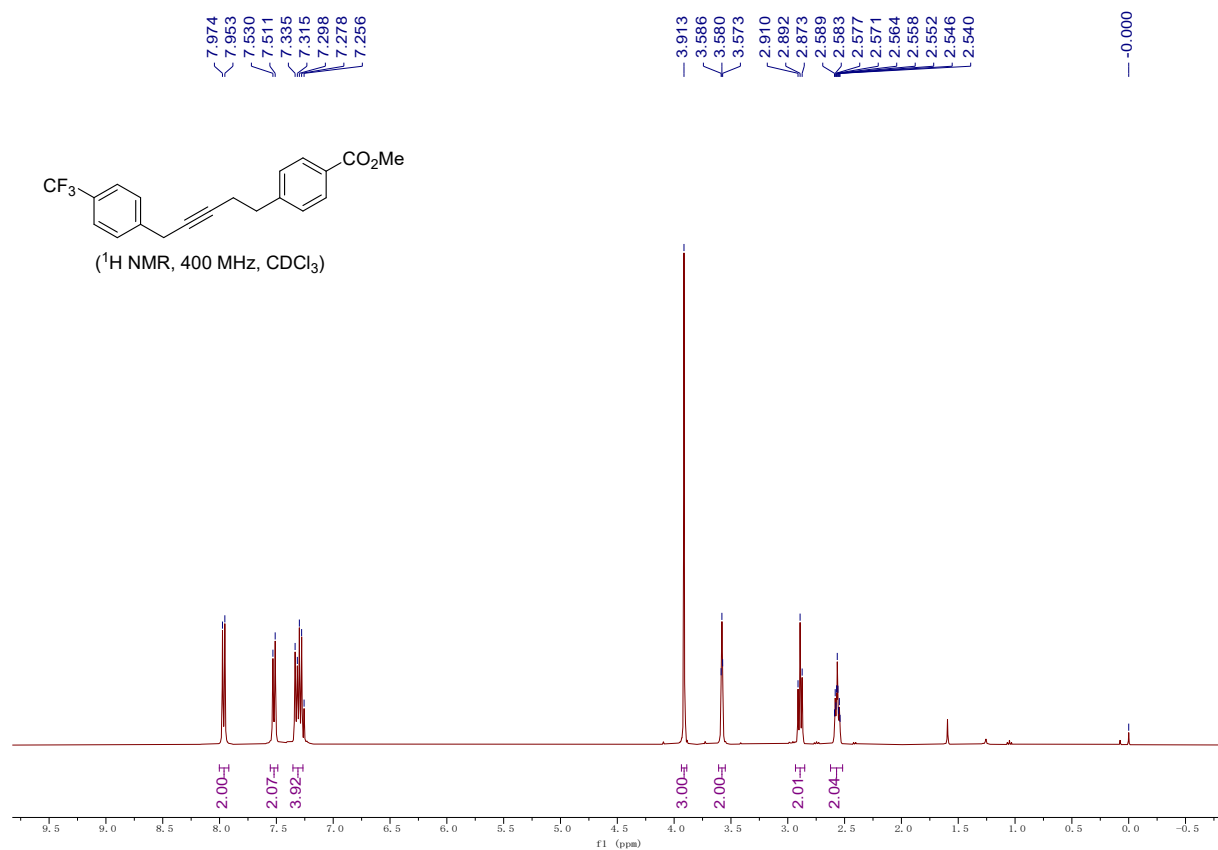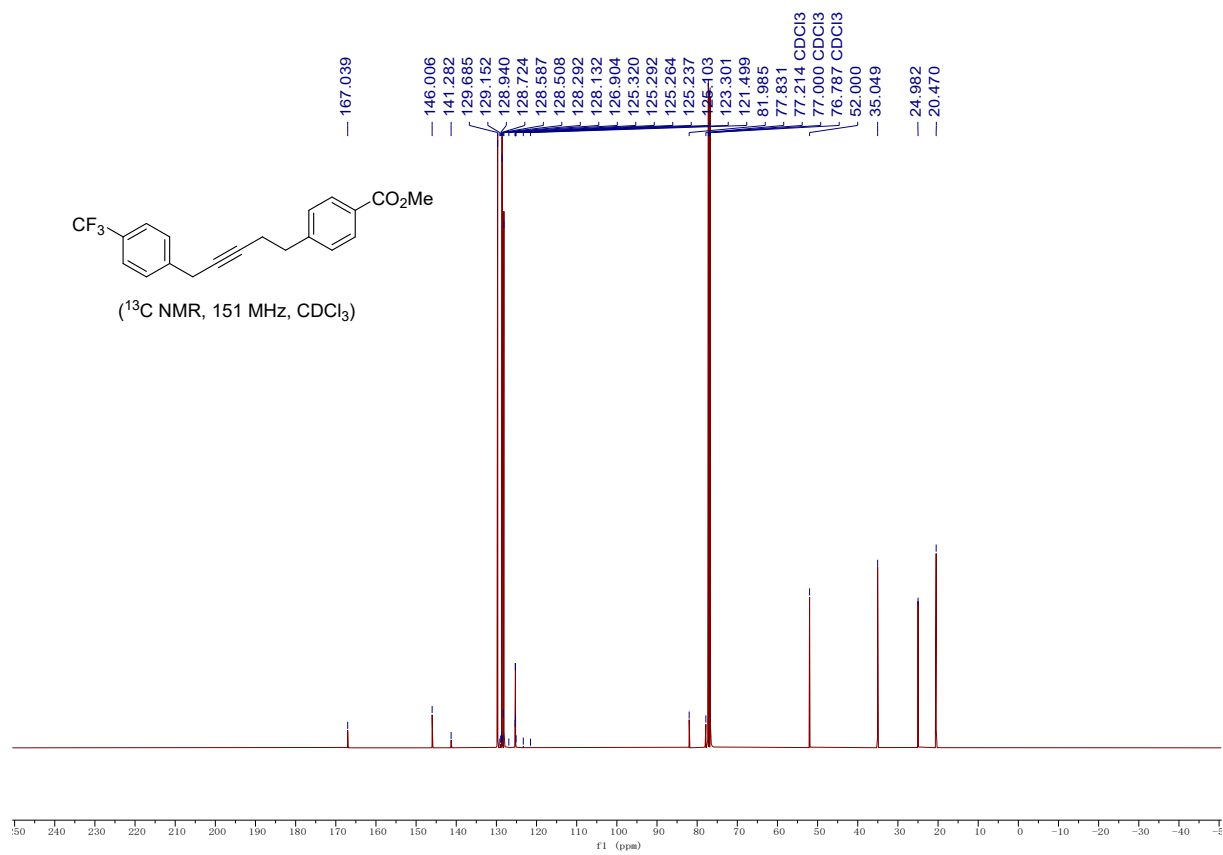

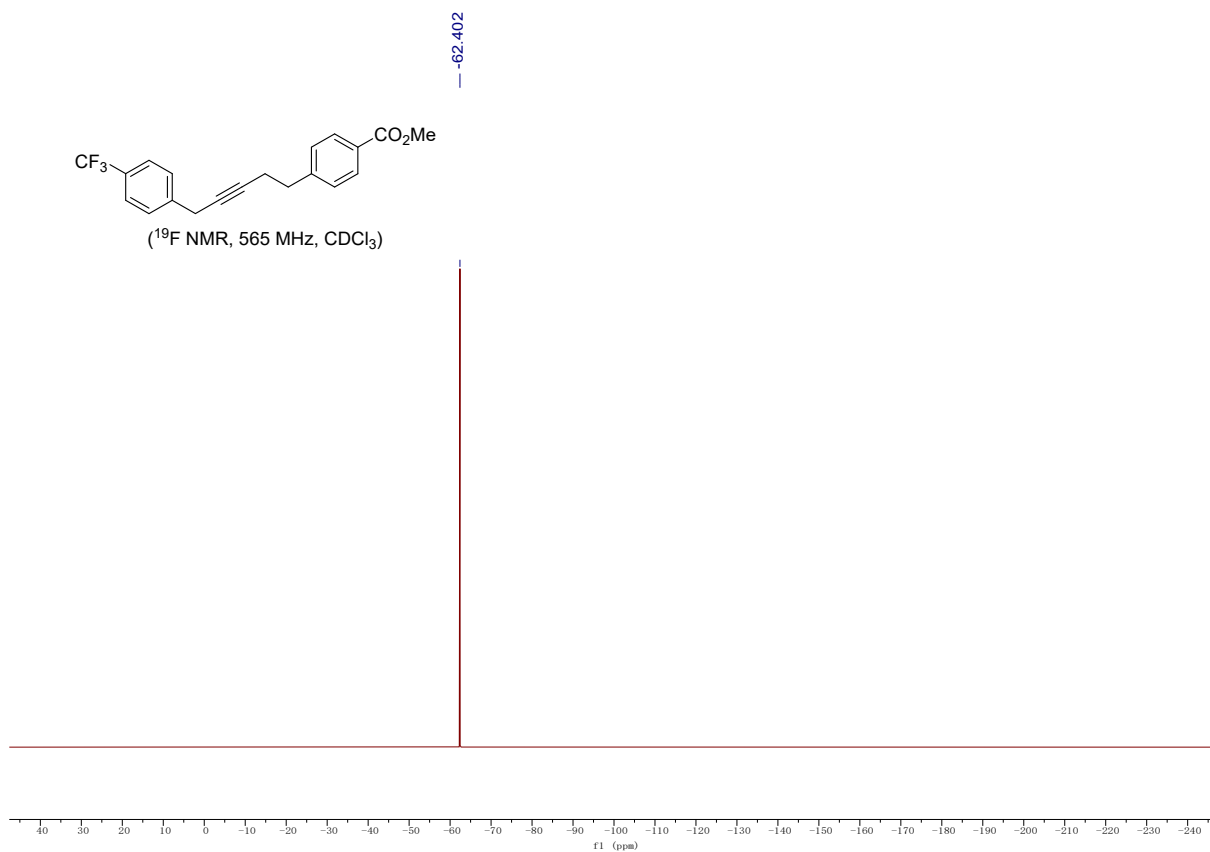

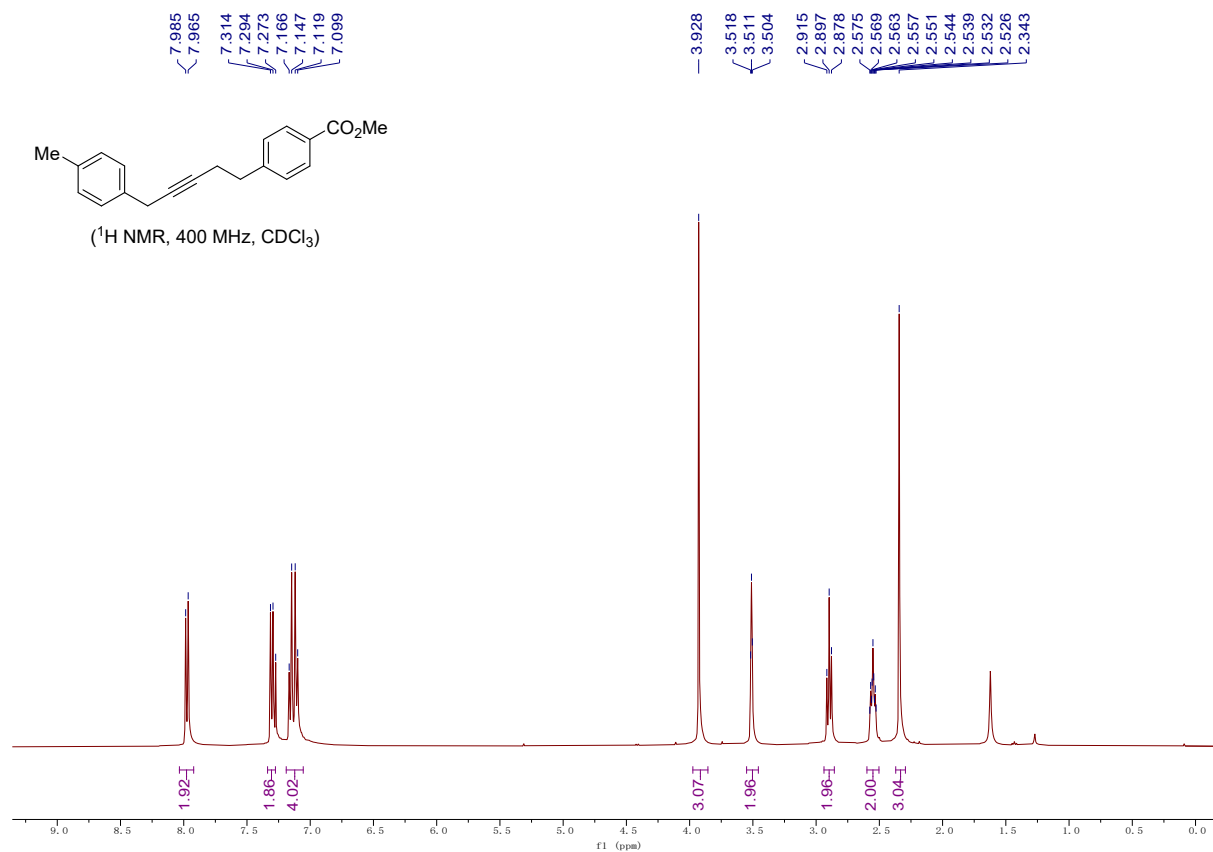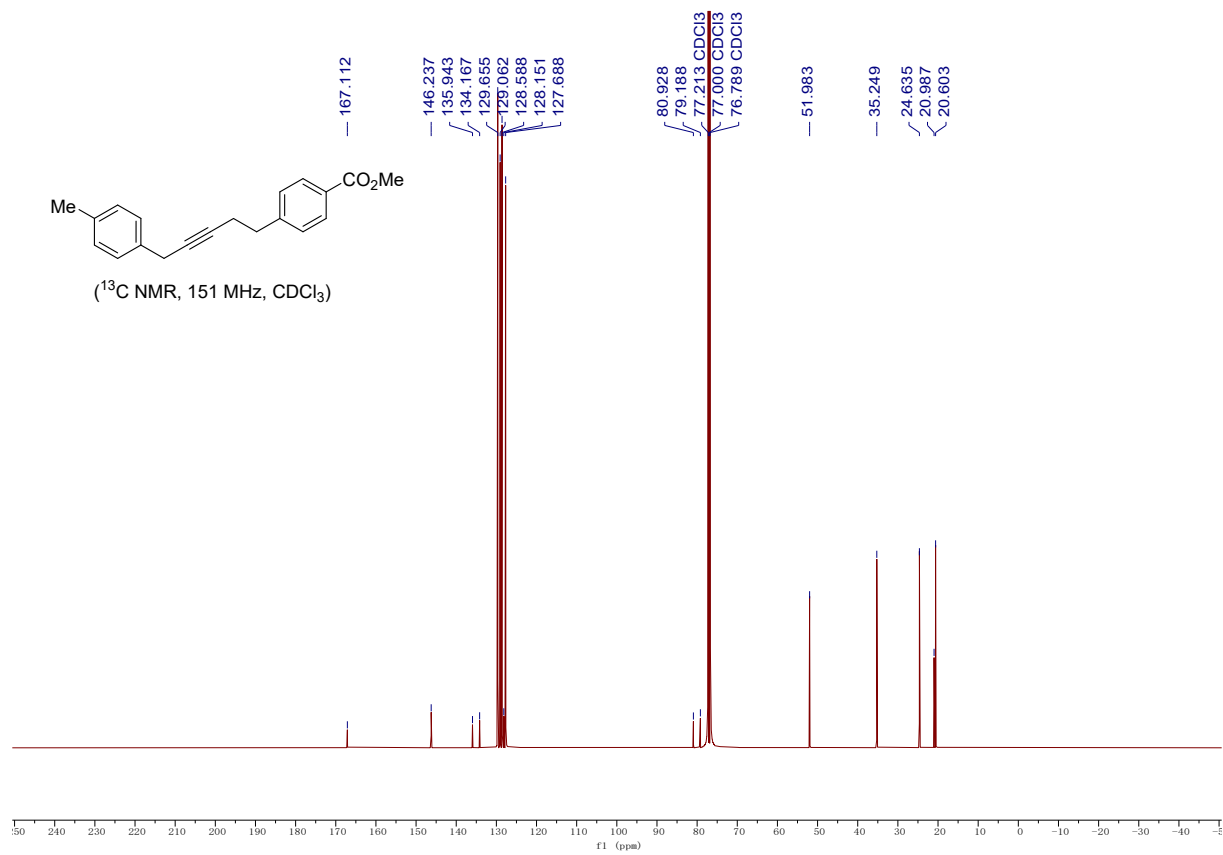

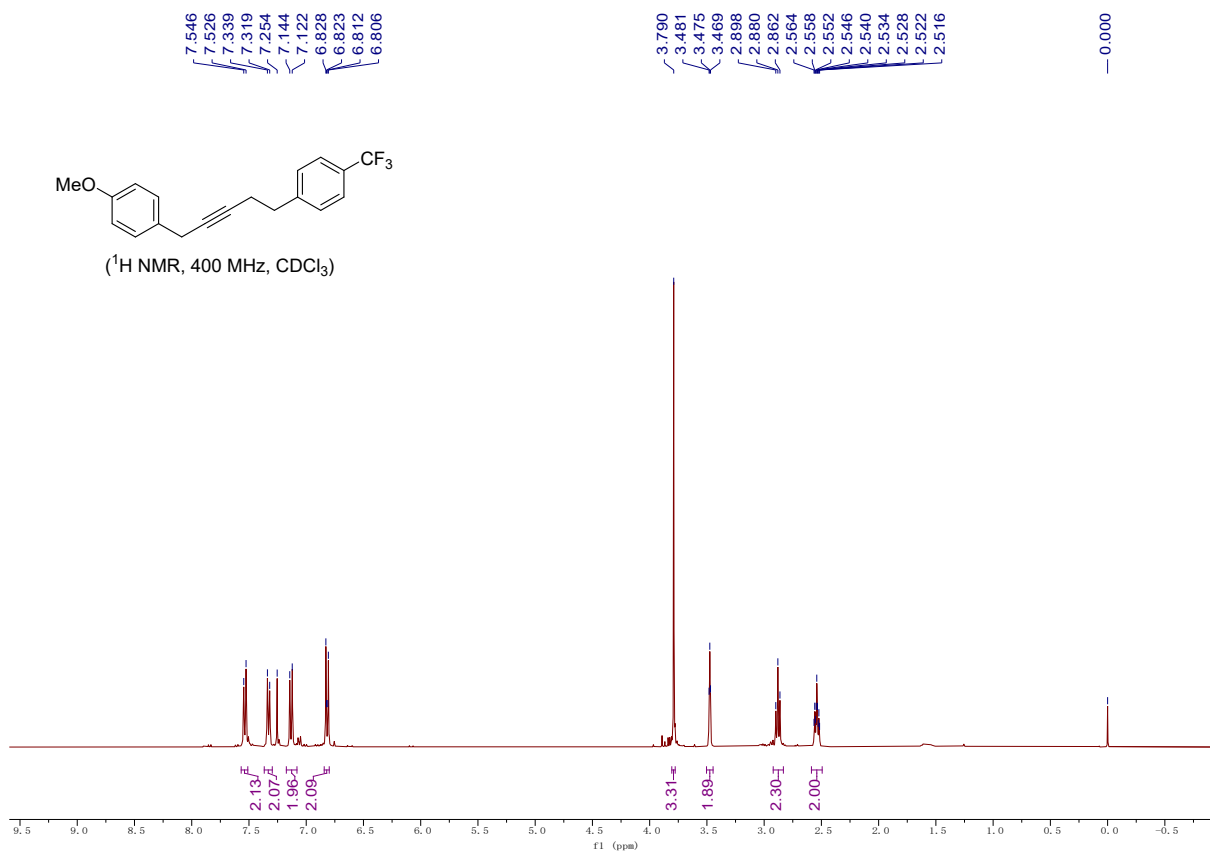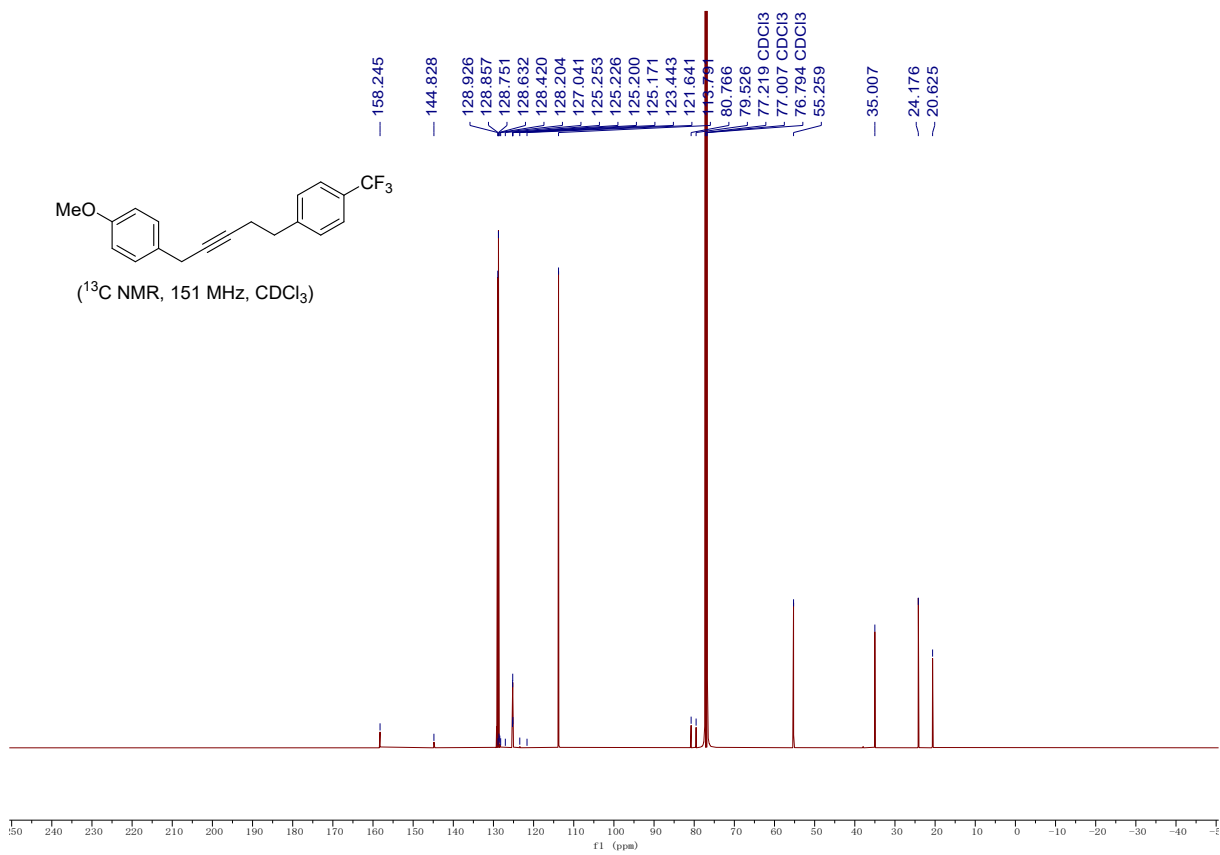

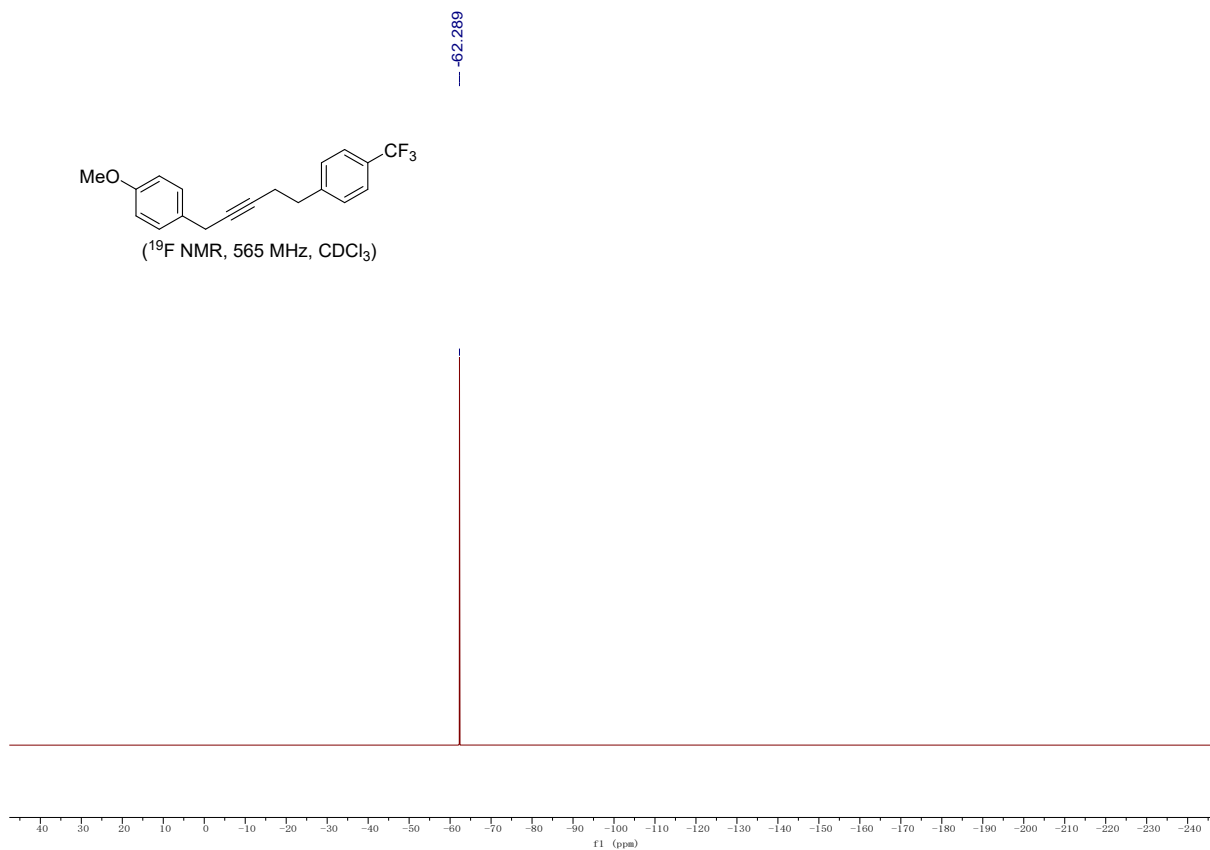

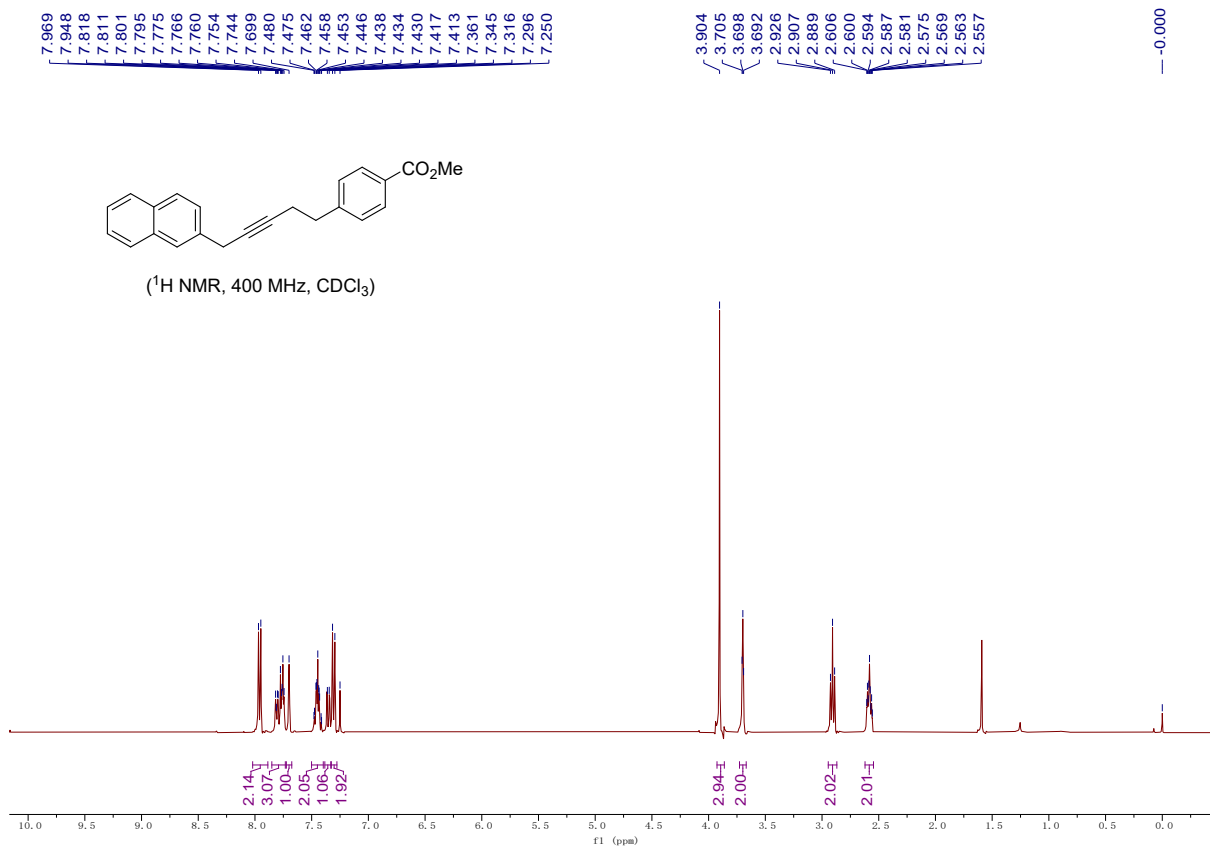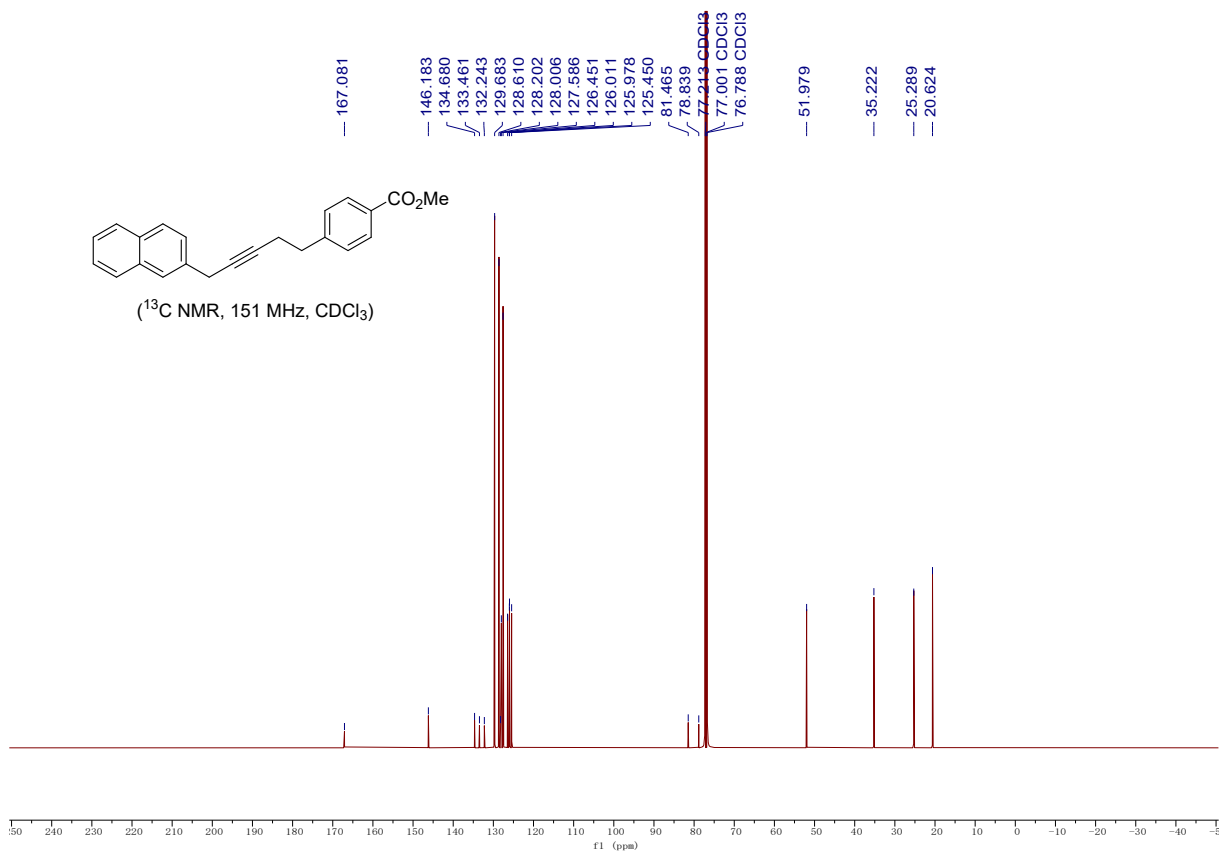



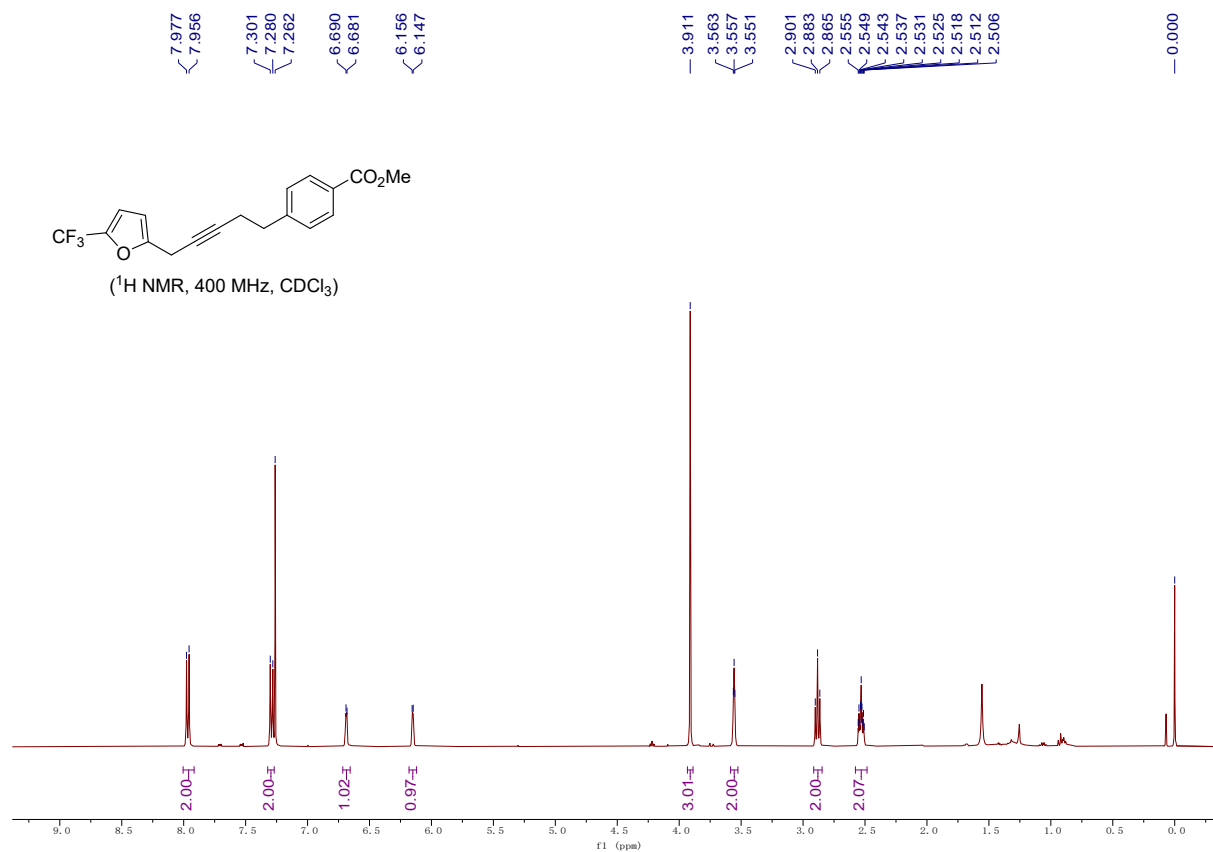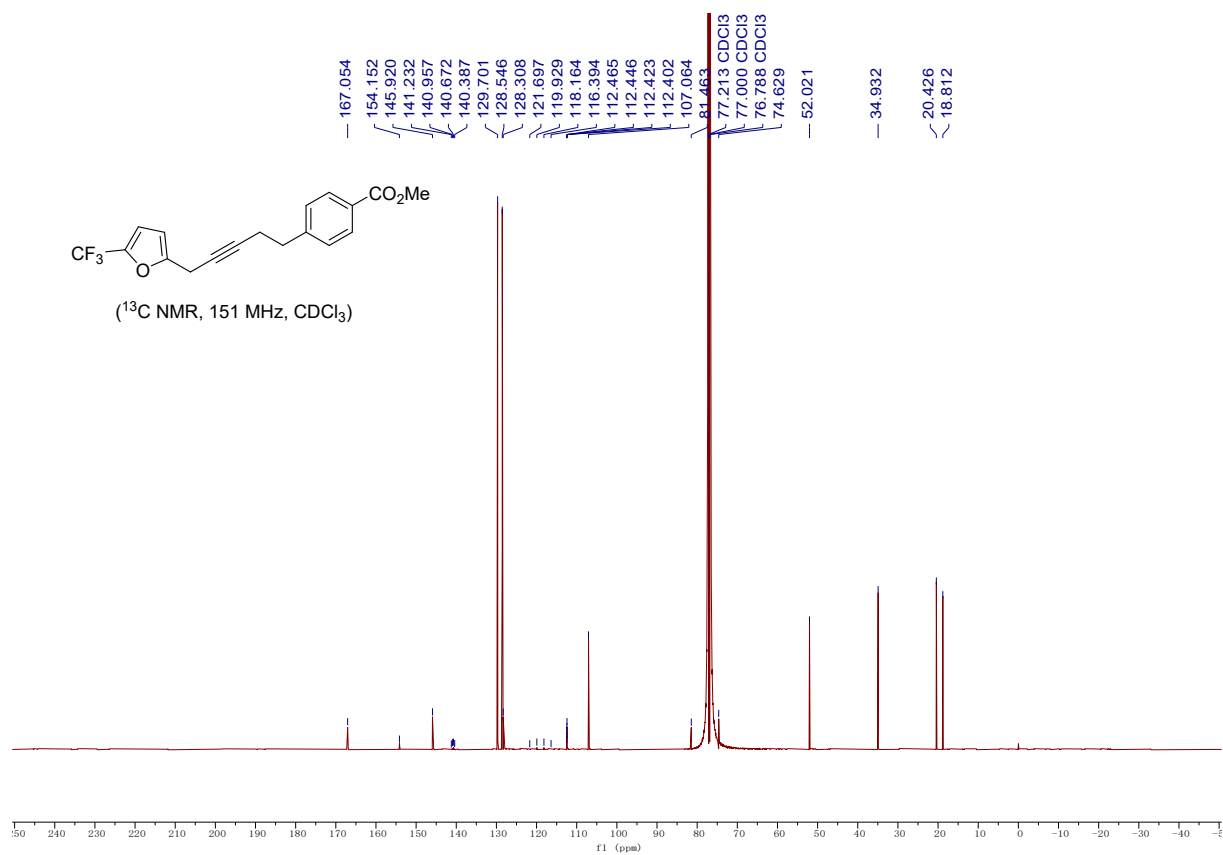

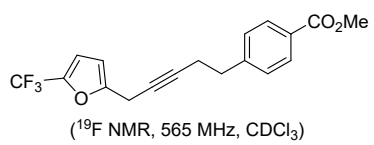

-63.985

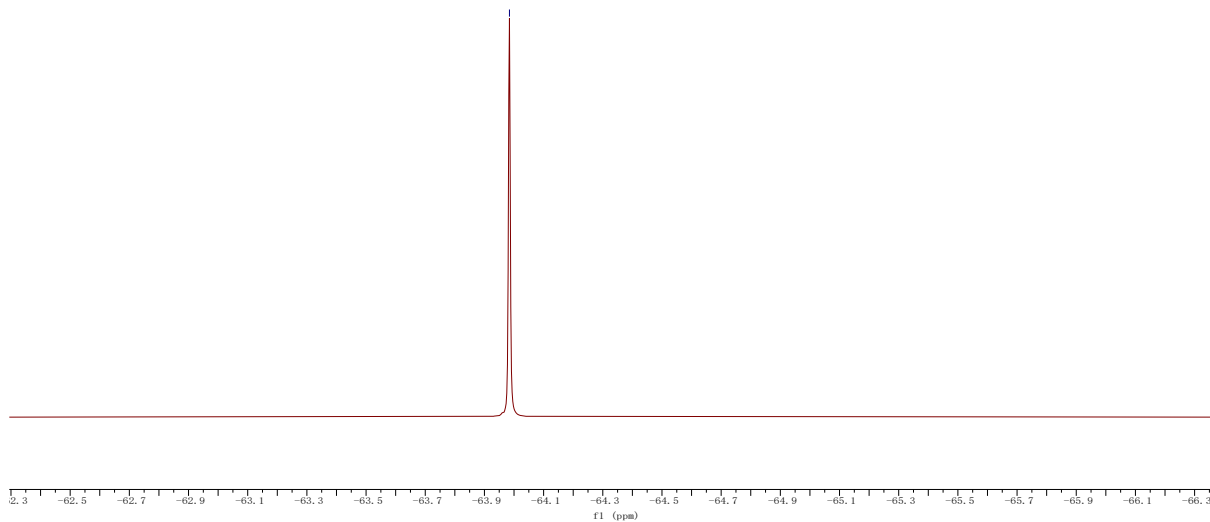

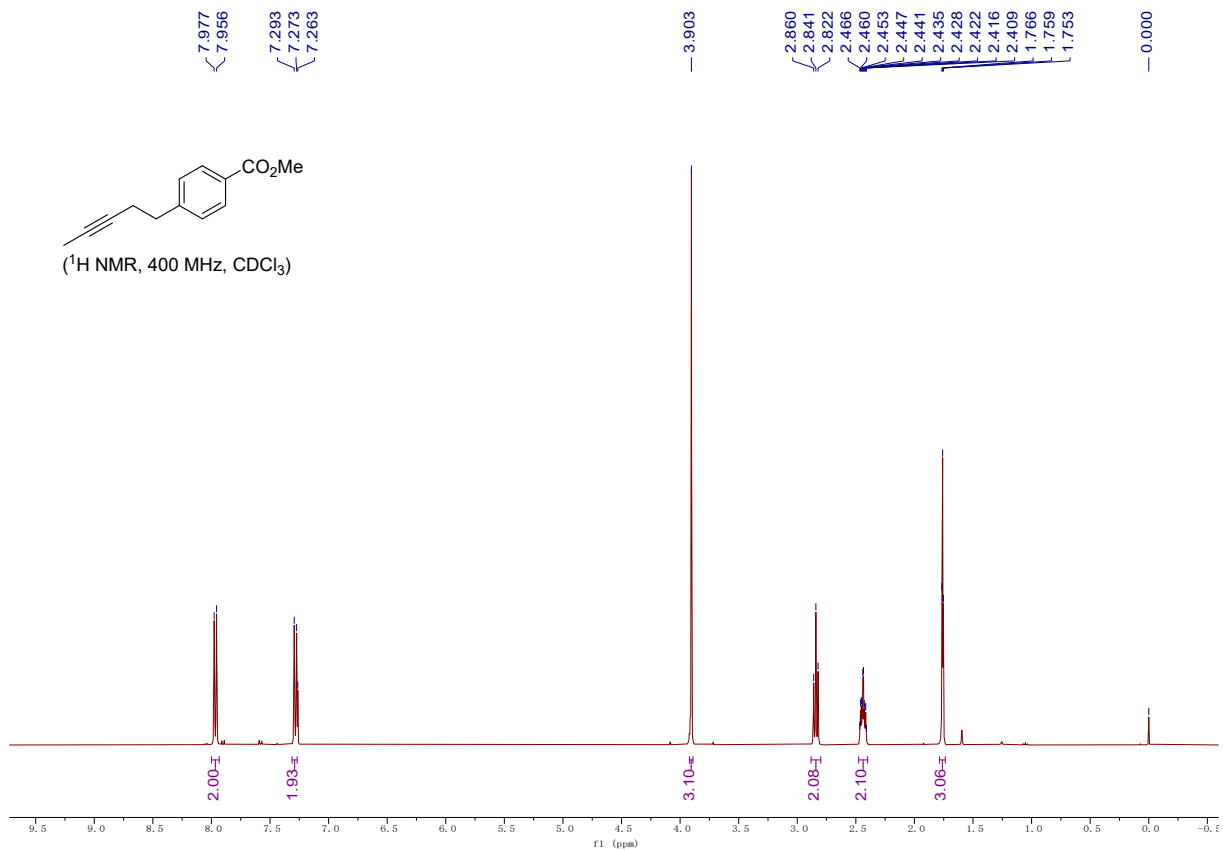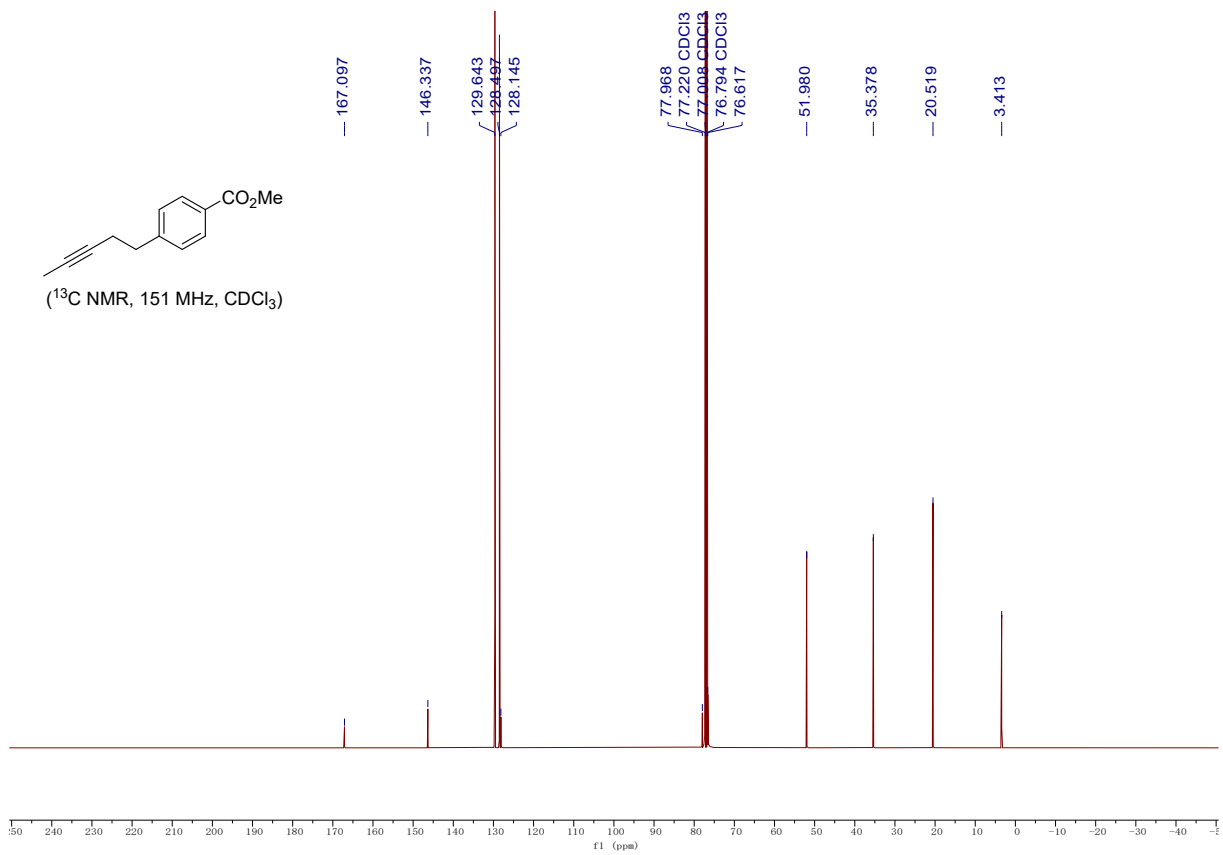

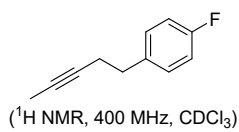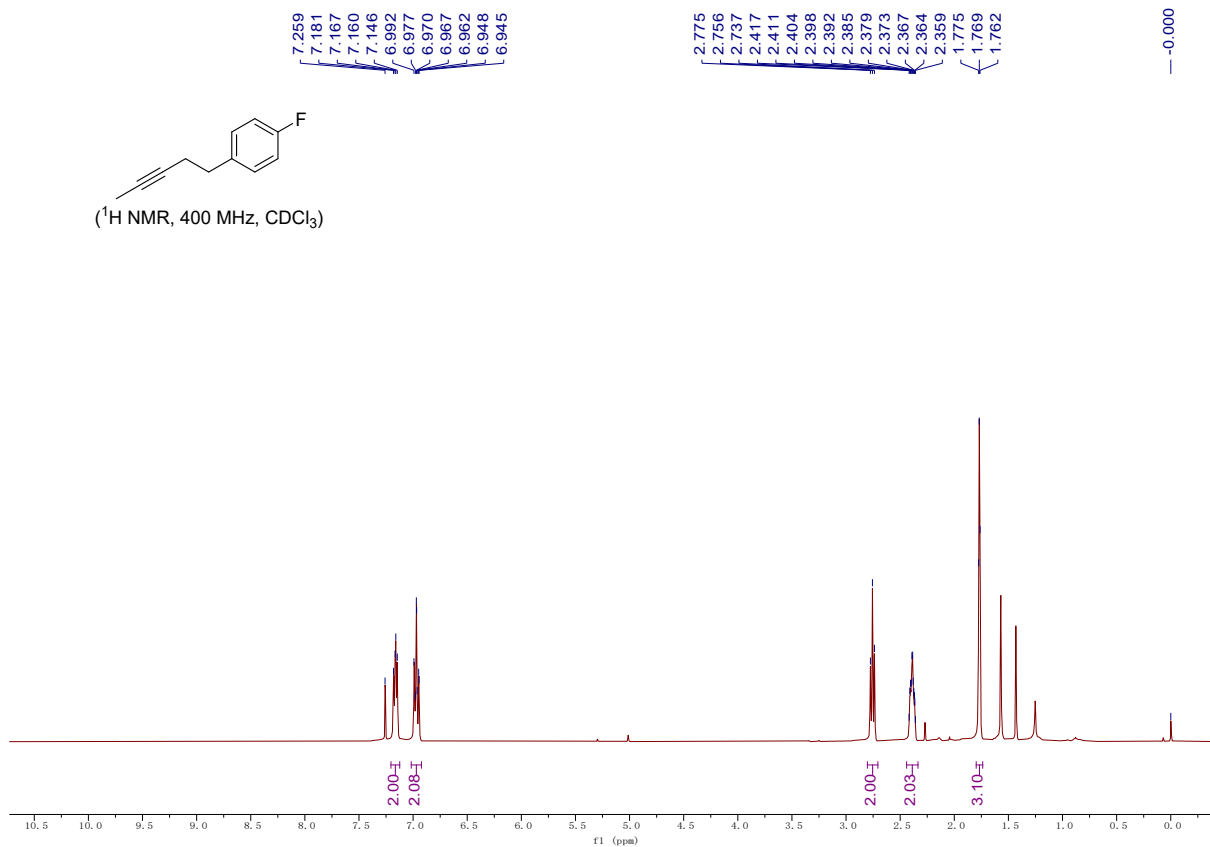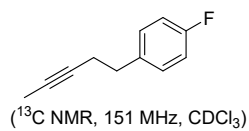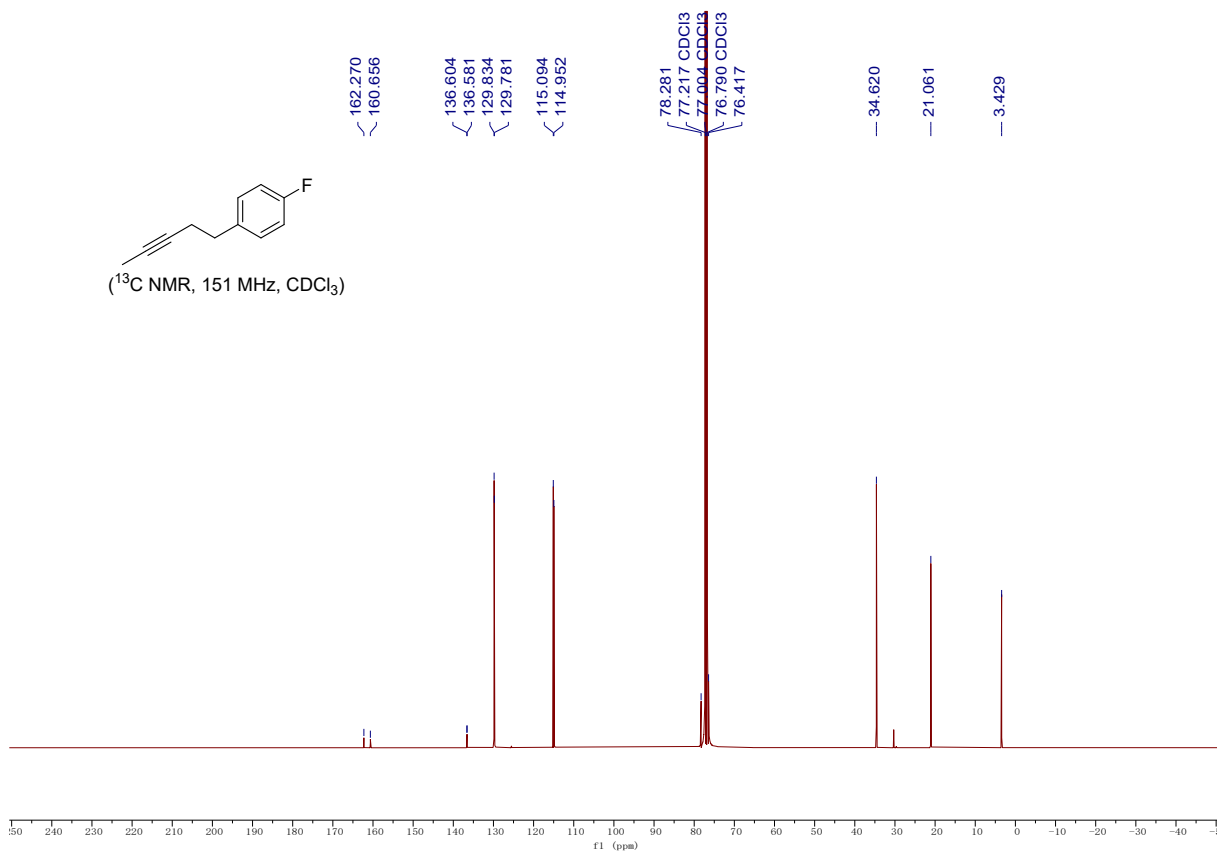

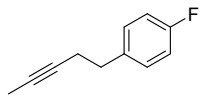

(<sup>19</sup>F NMR, 565 MHz, CDCl<sub>3</sub>)

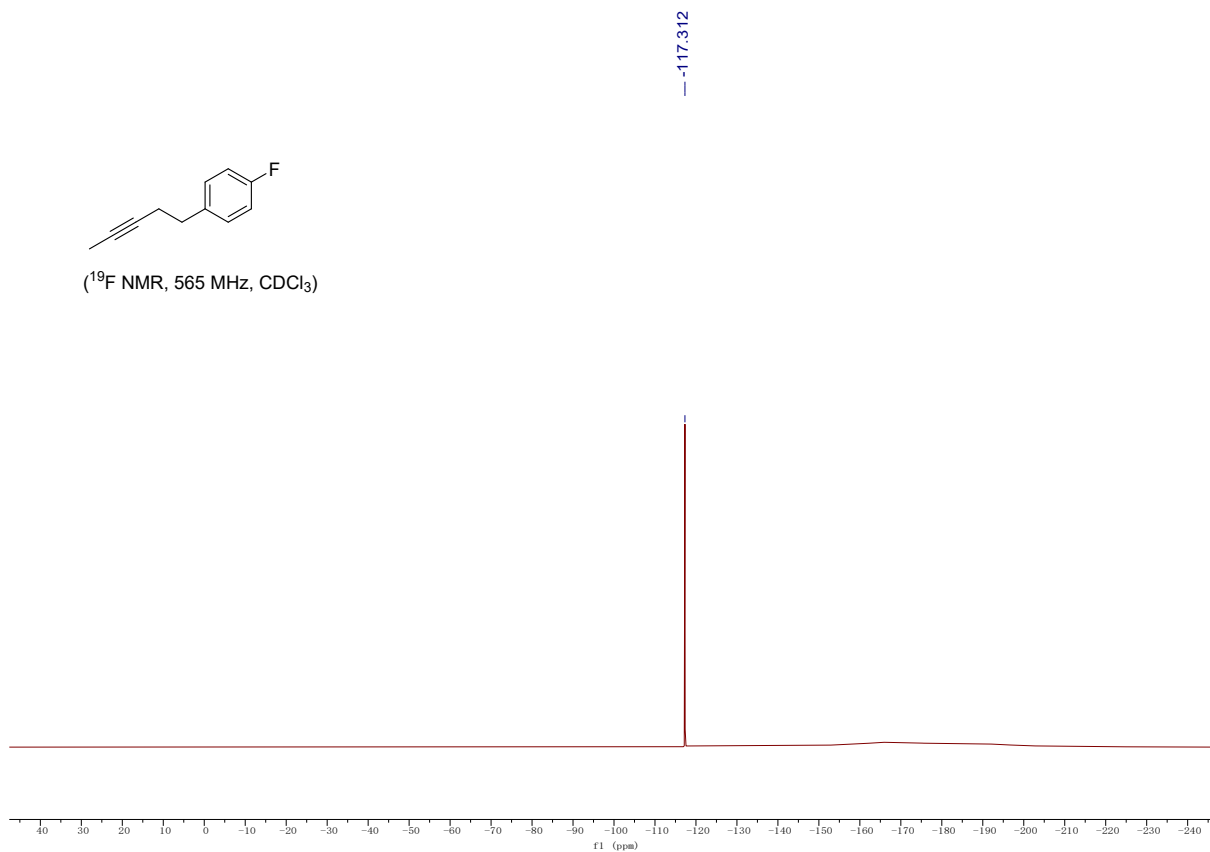

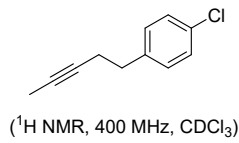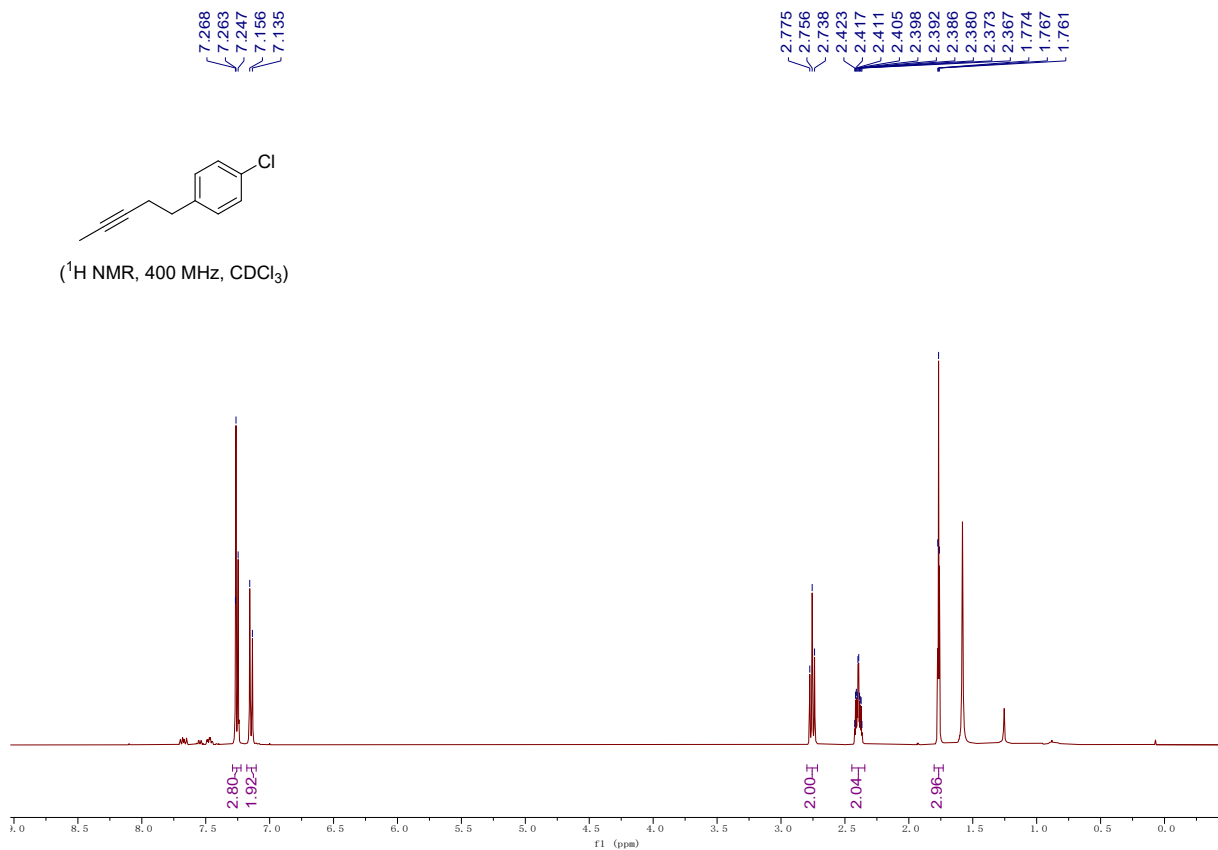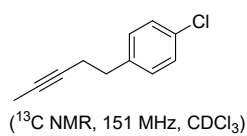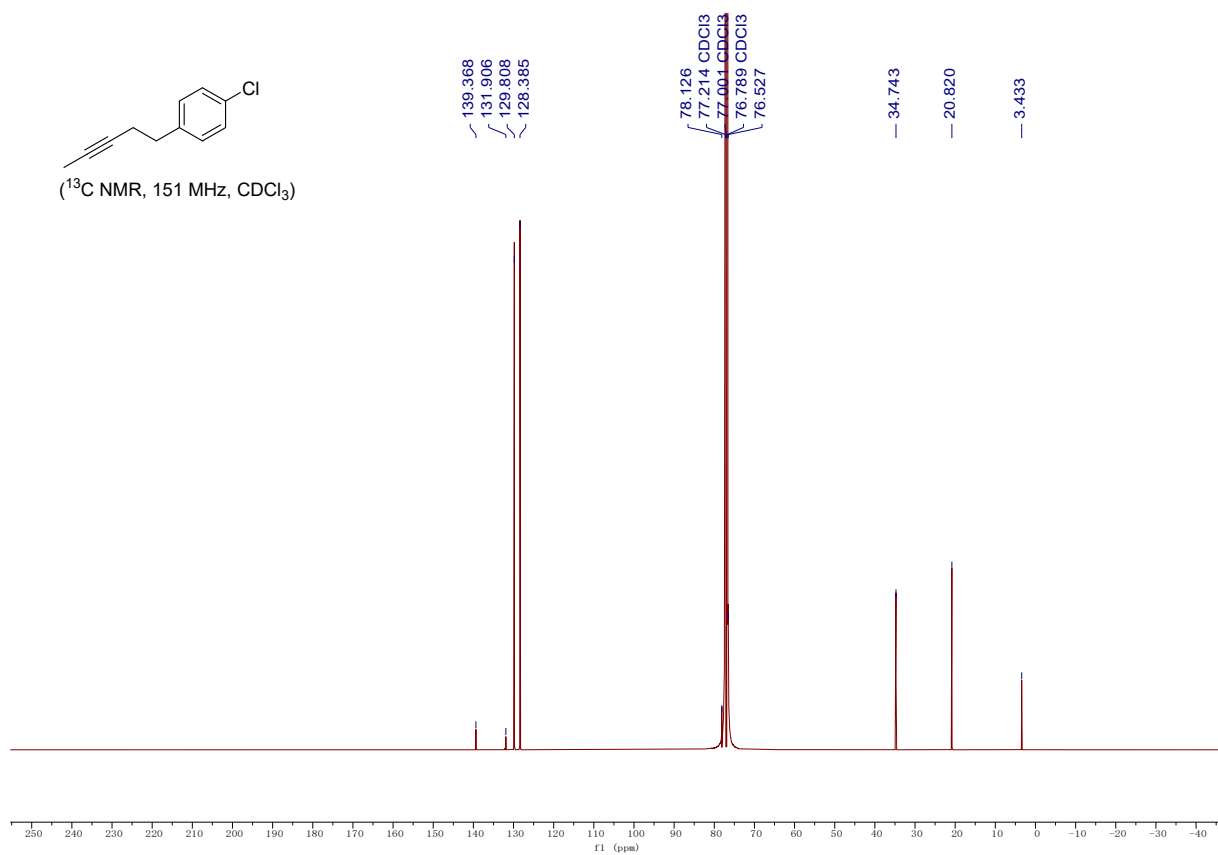

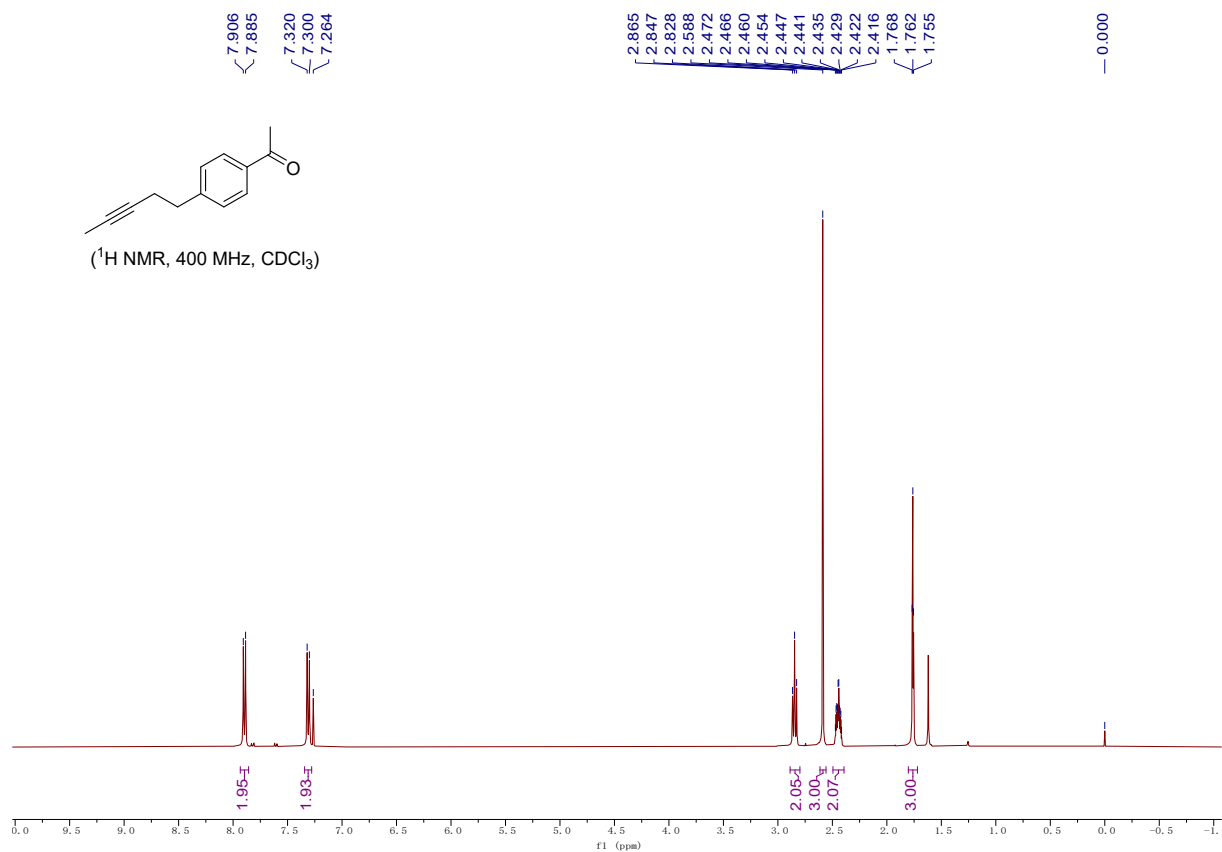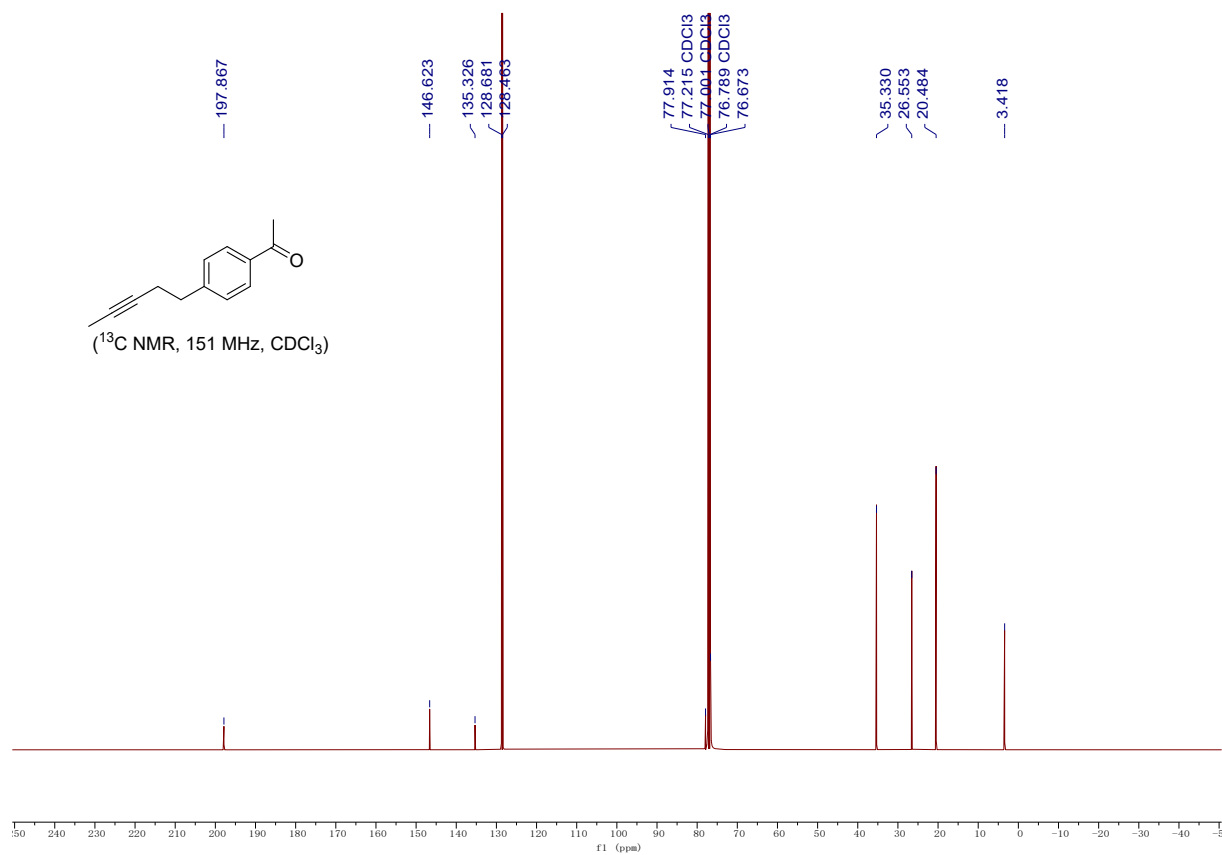

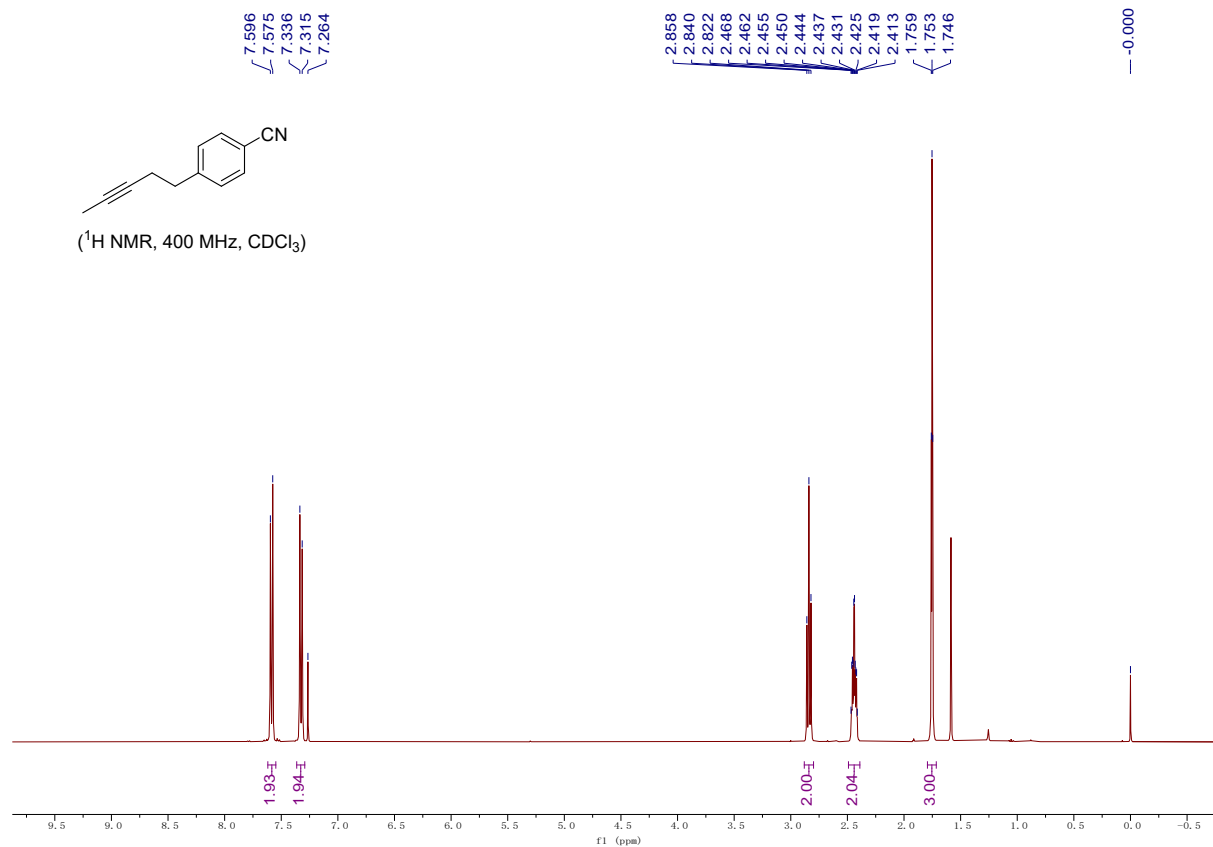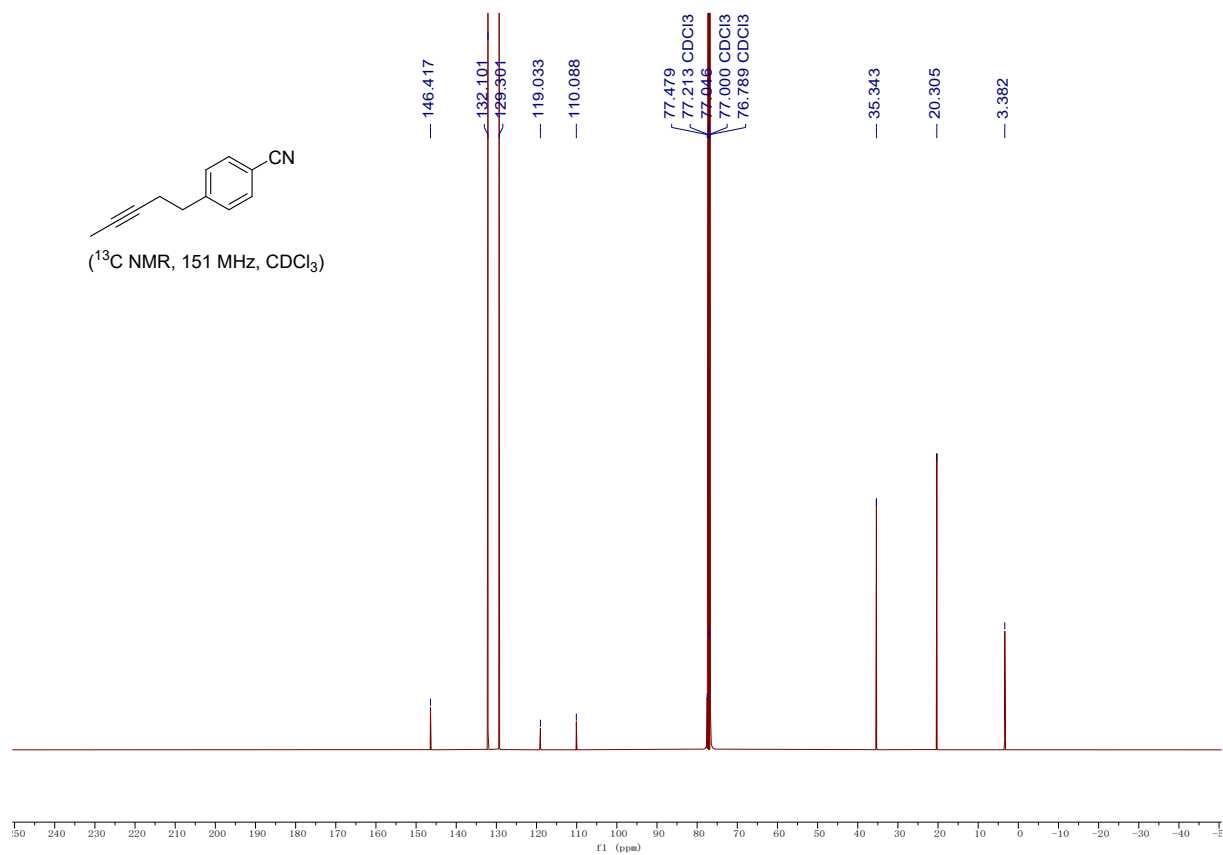



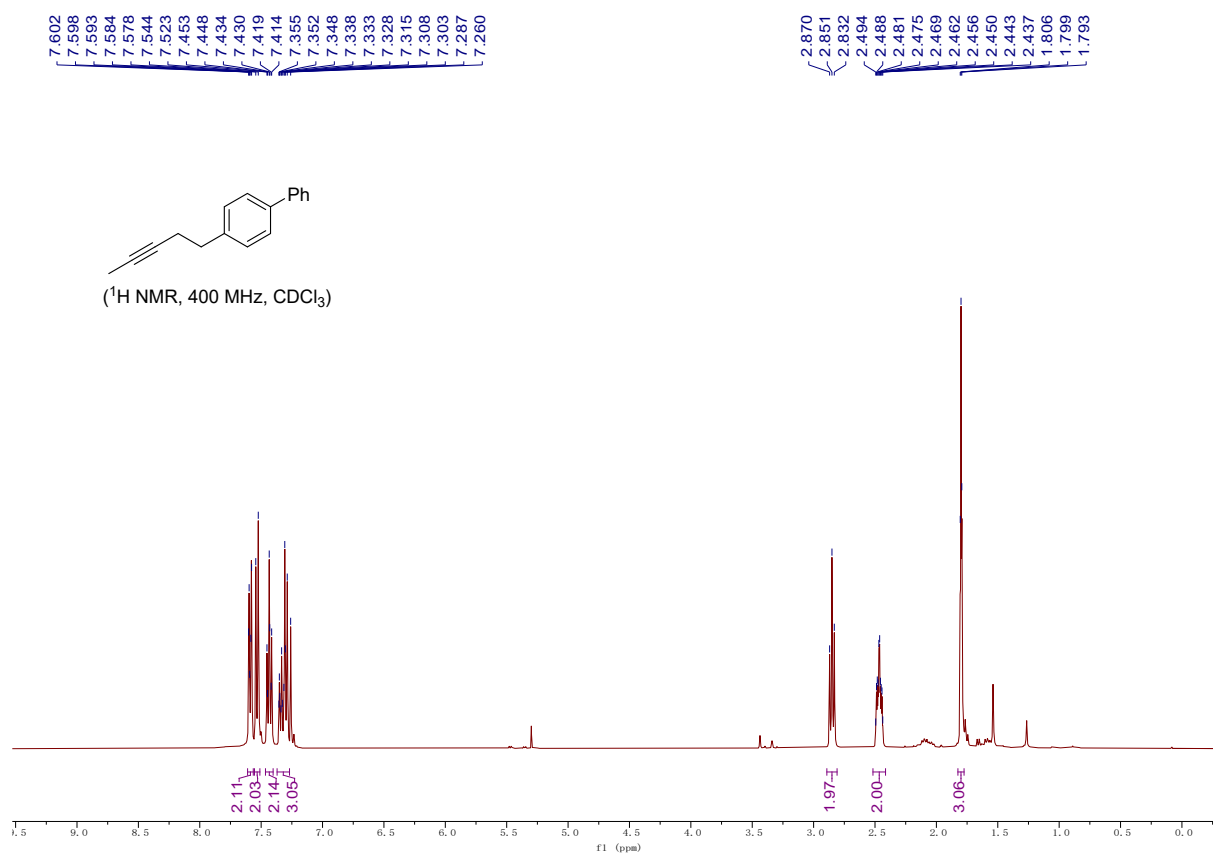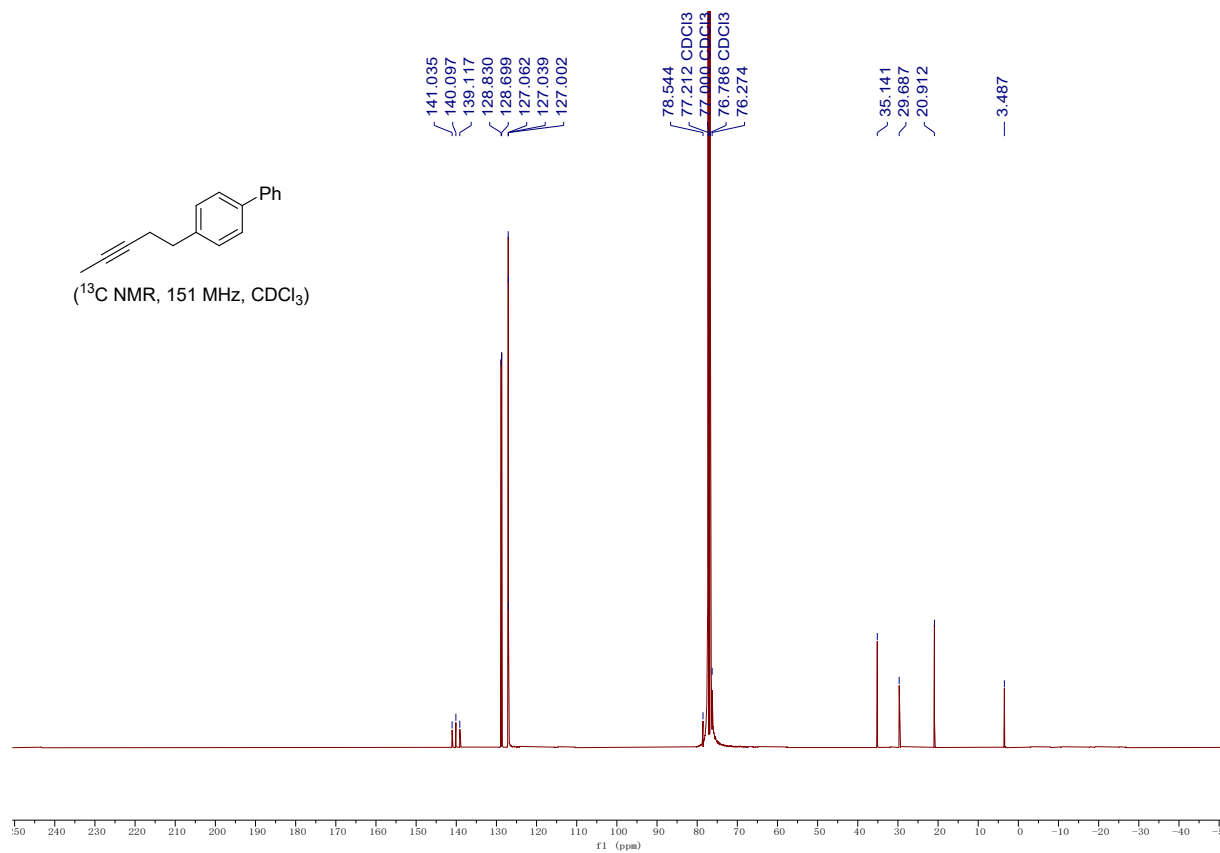

**Containing a trace amount of impurity that failed to be separated.**

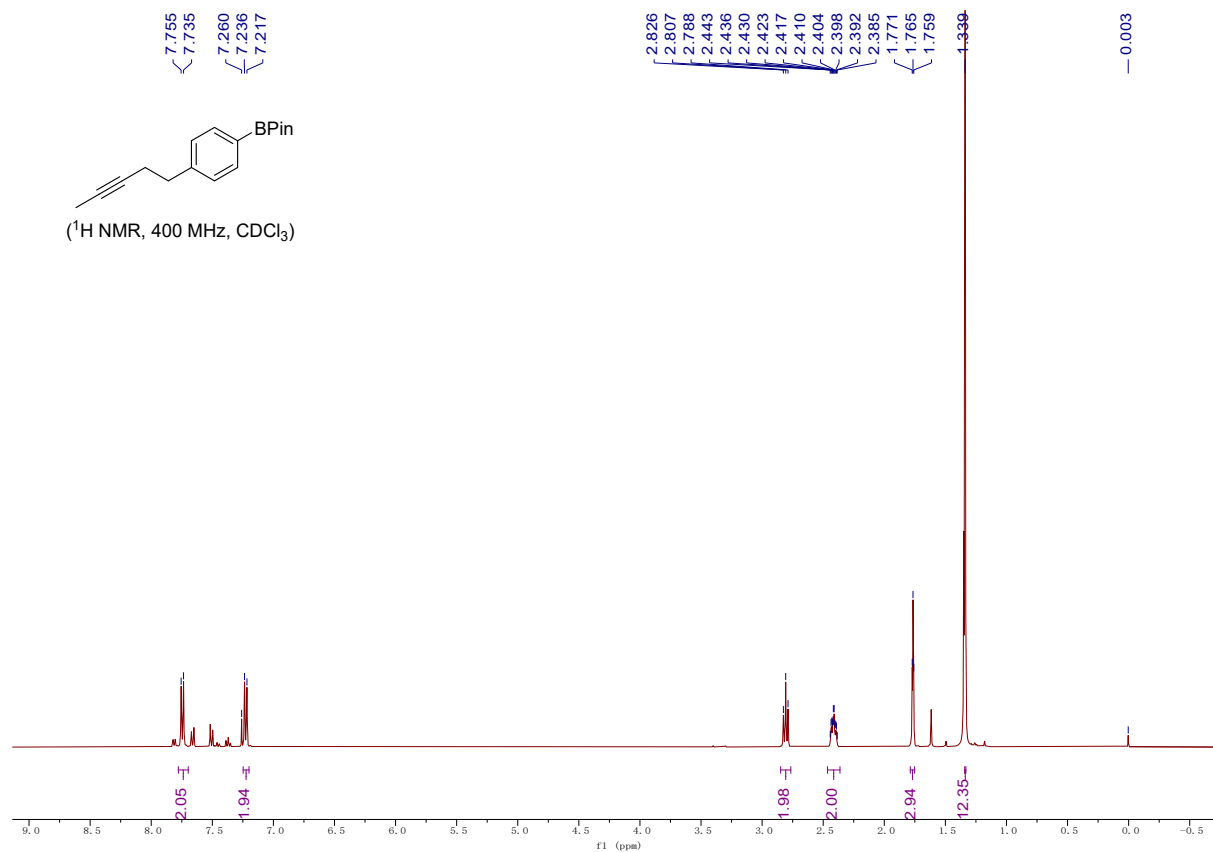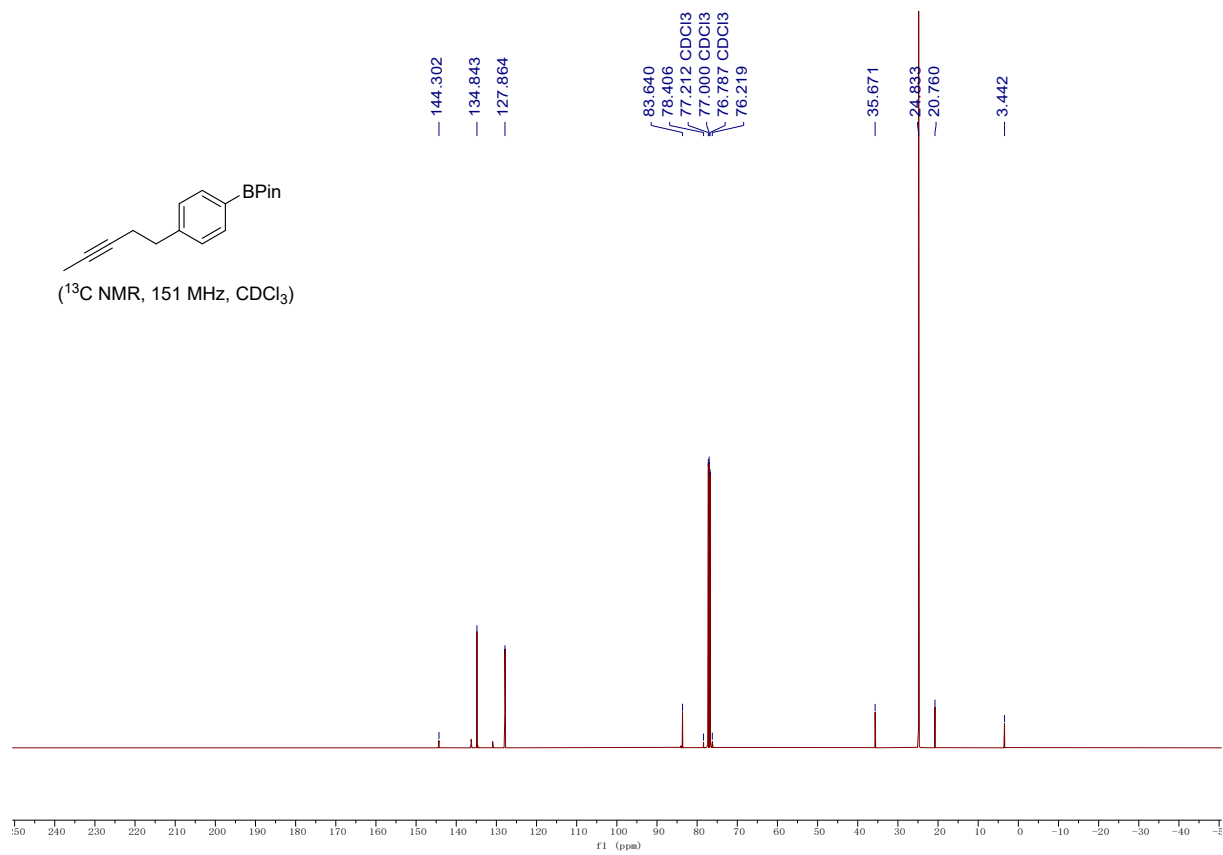

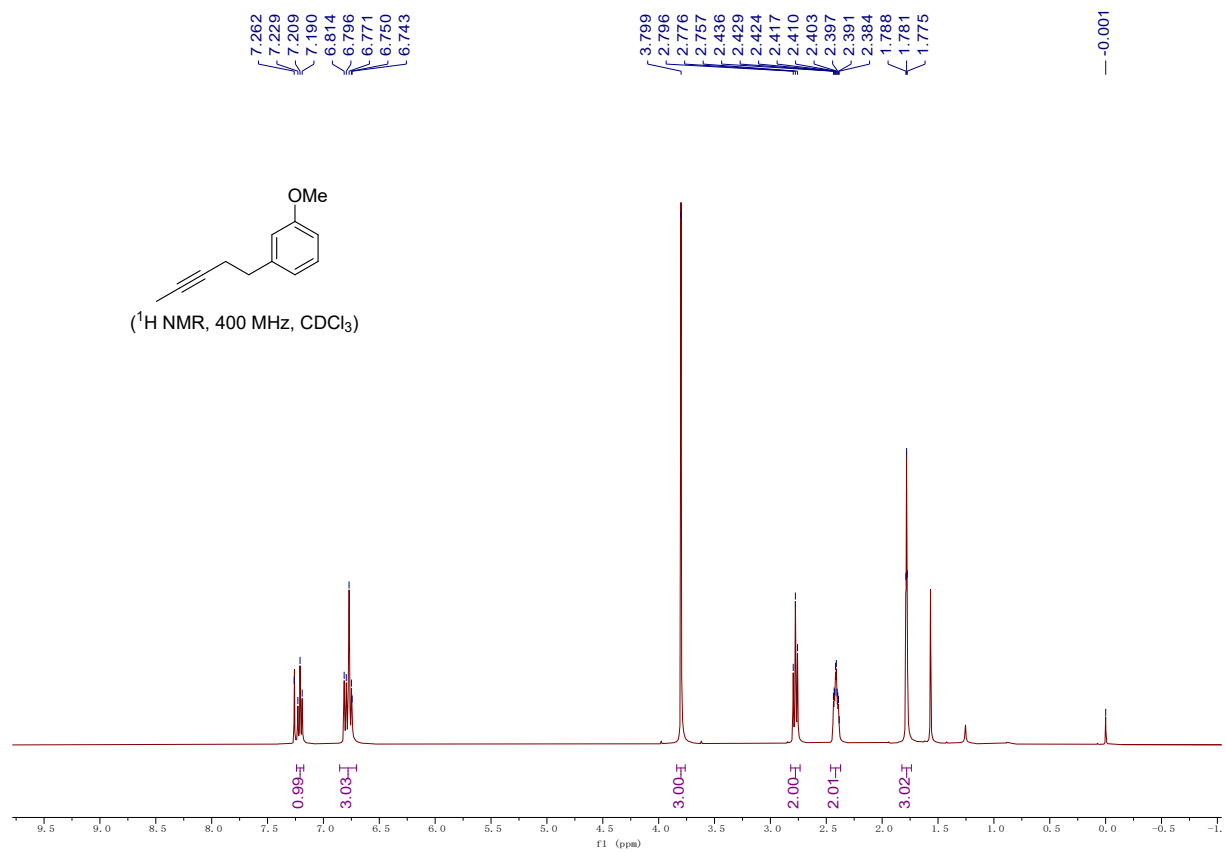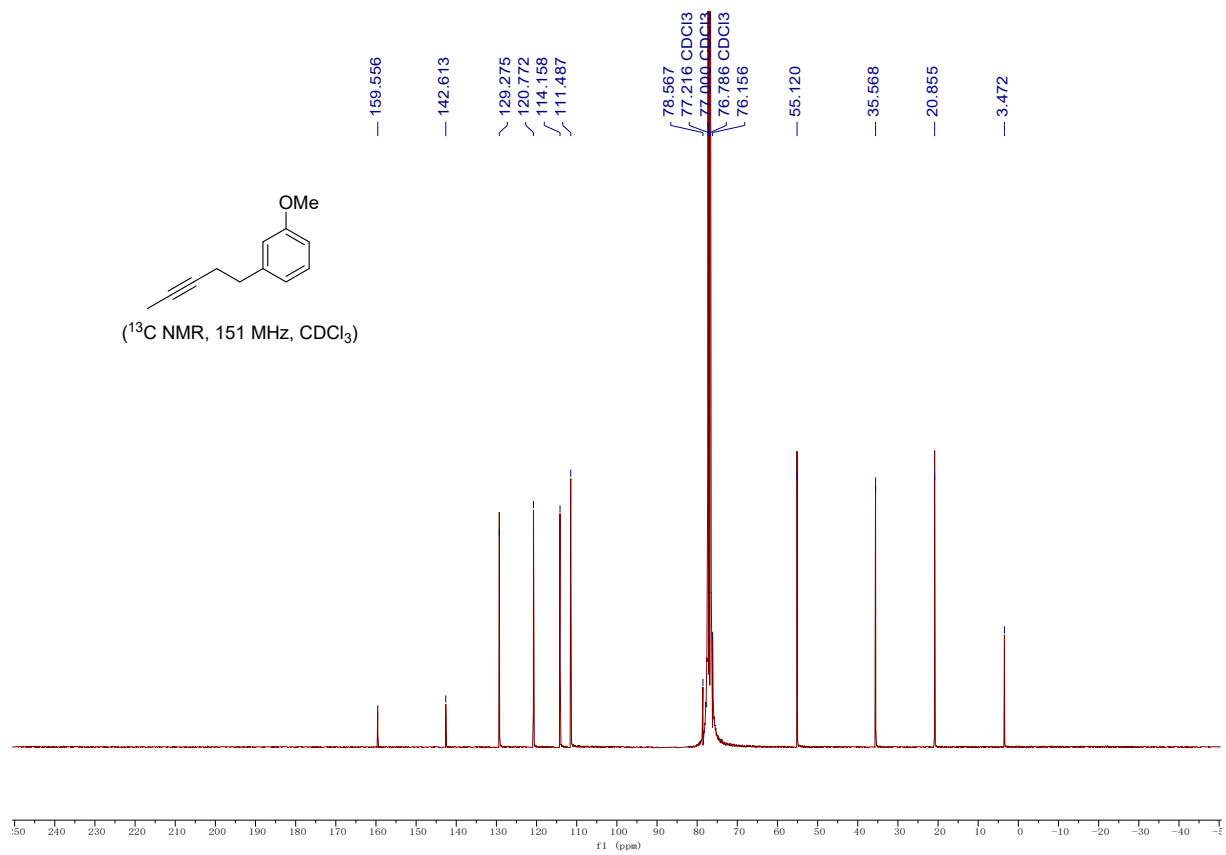

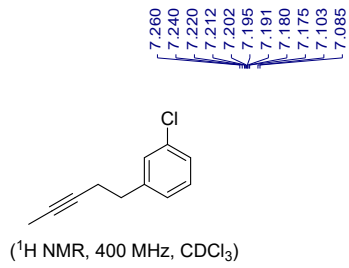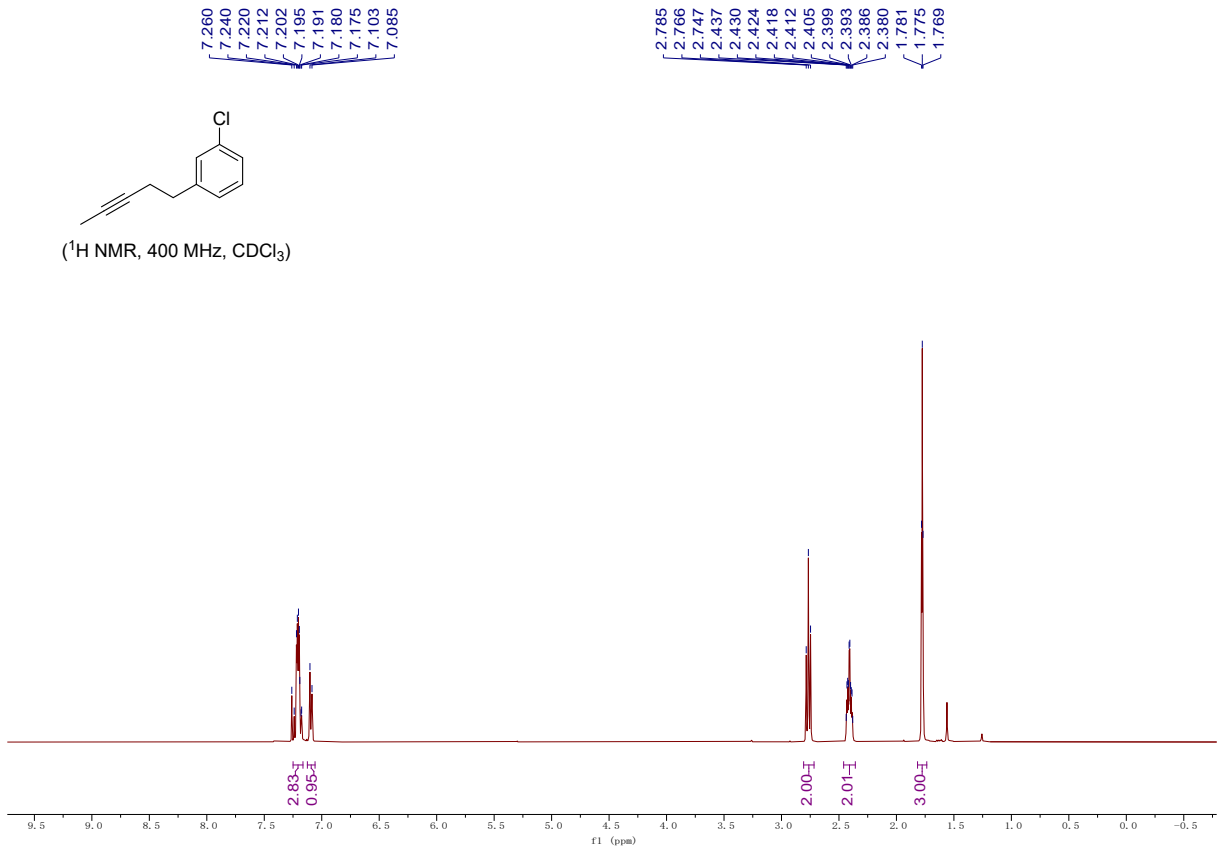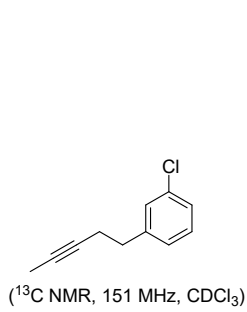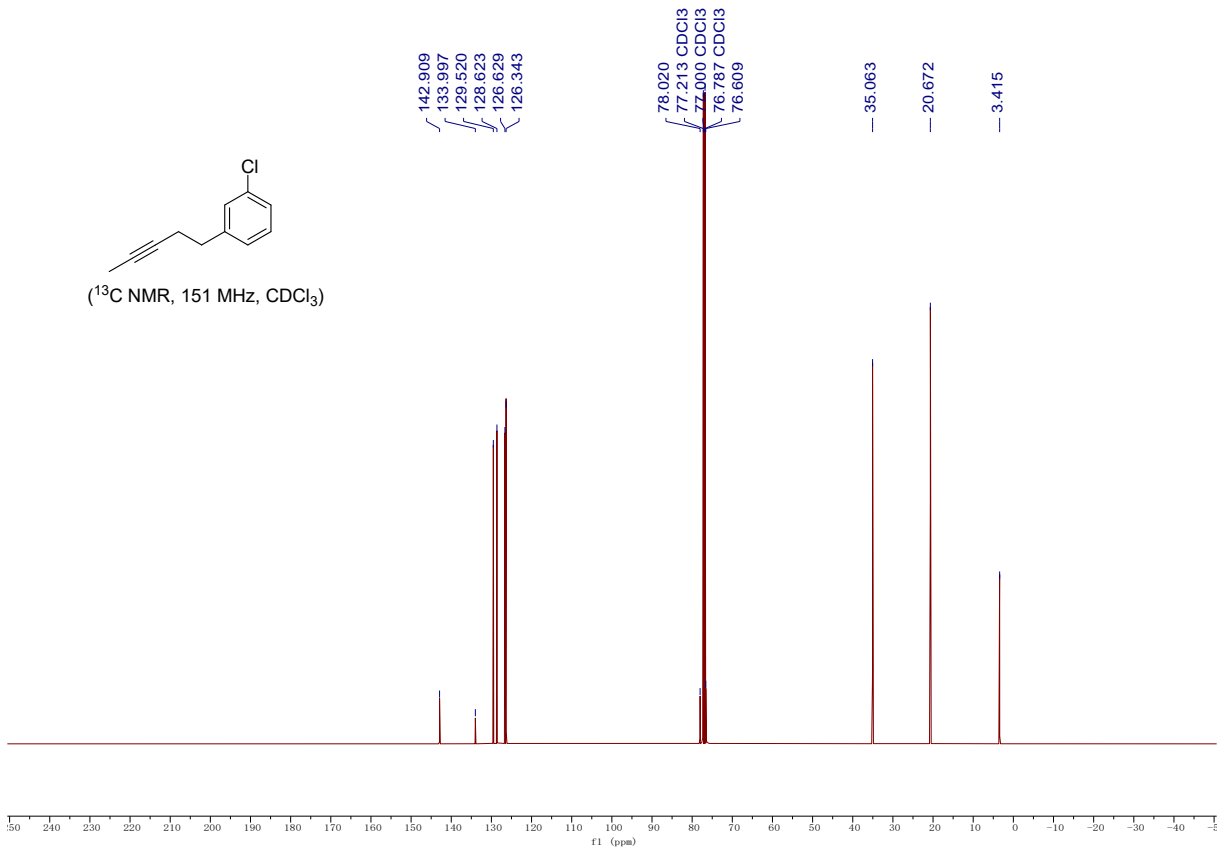

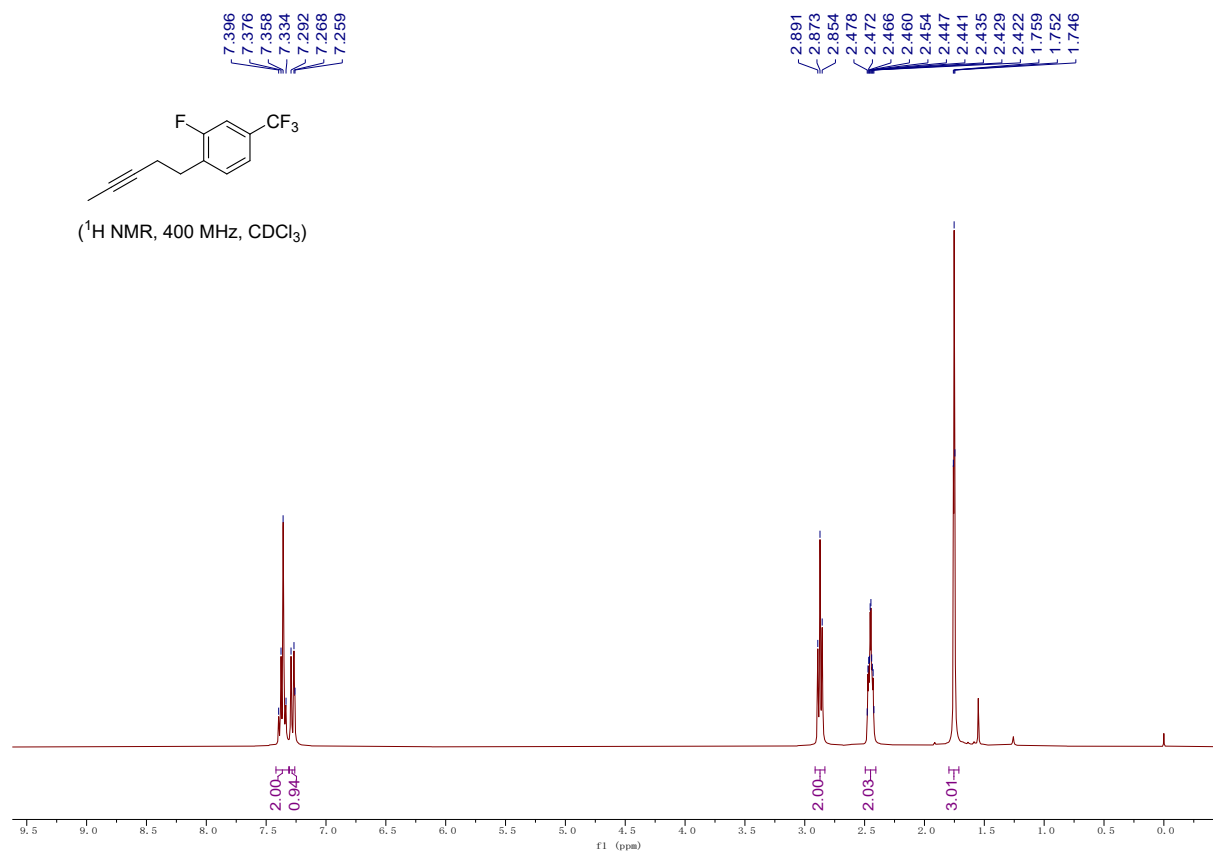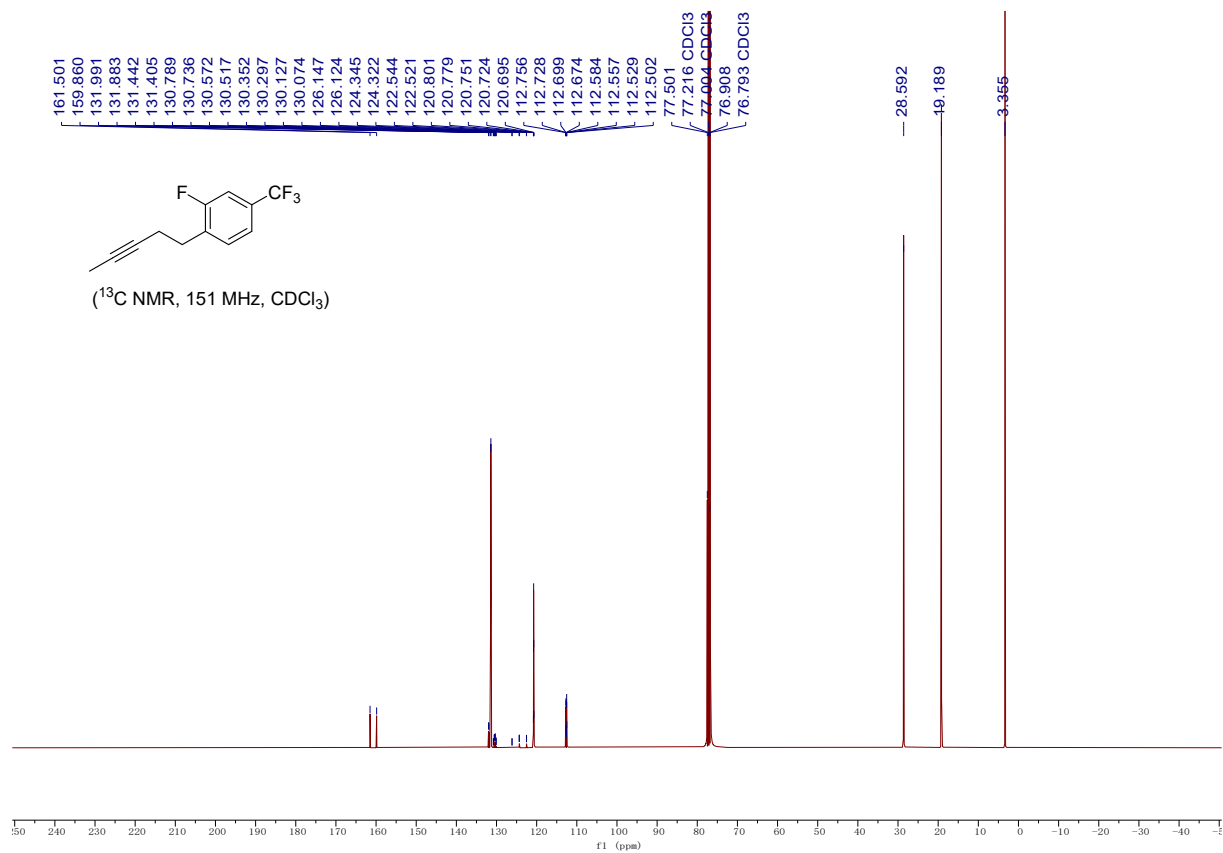

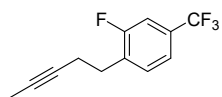

(<sup>19</sup>F NMR, 565 MHz, CDCl<sub>3</sub>)

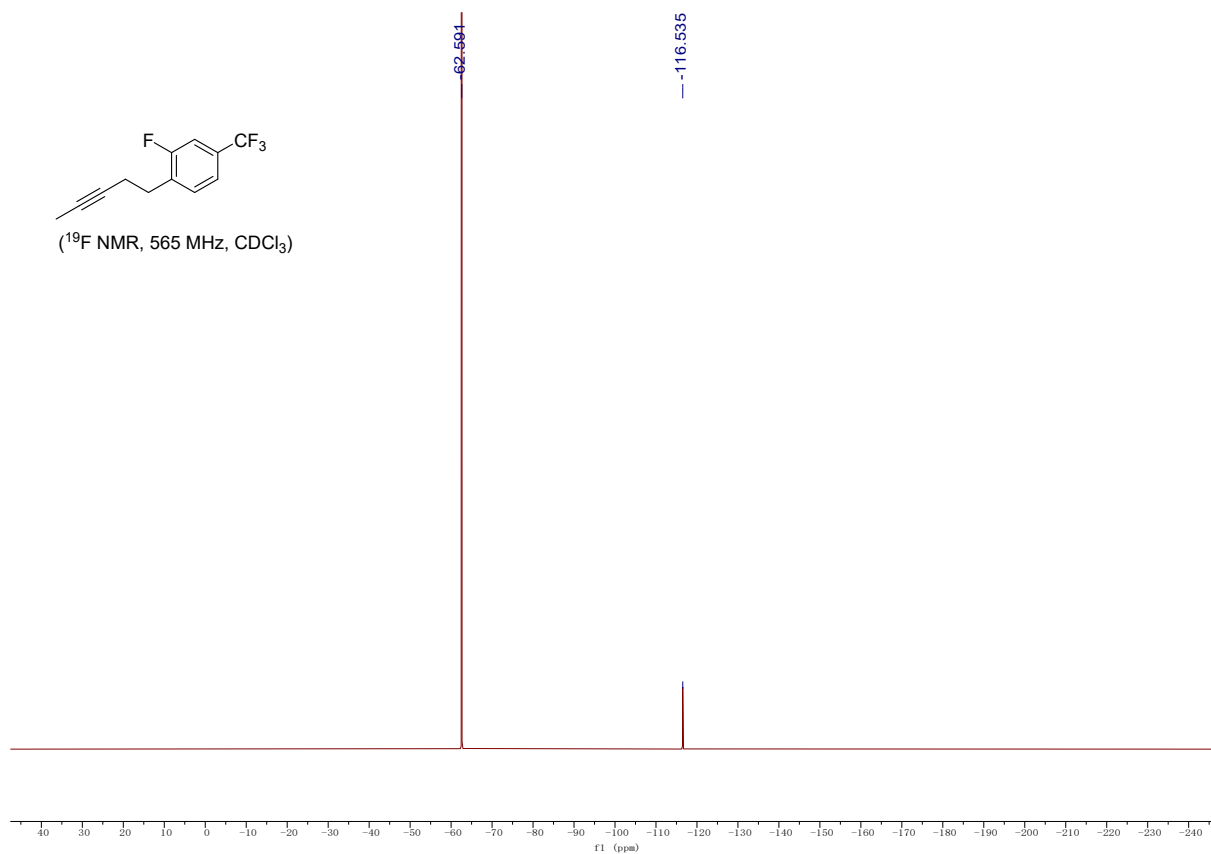

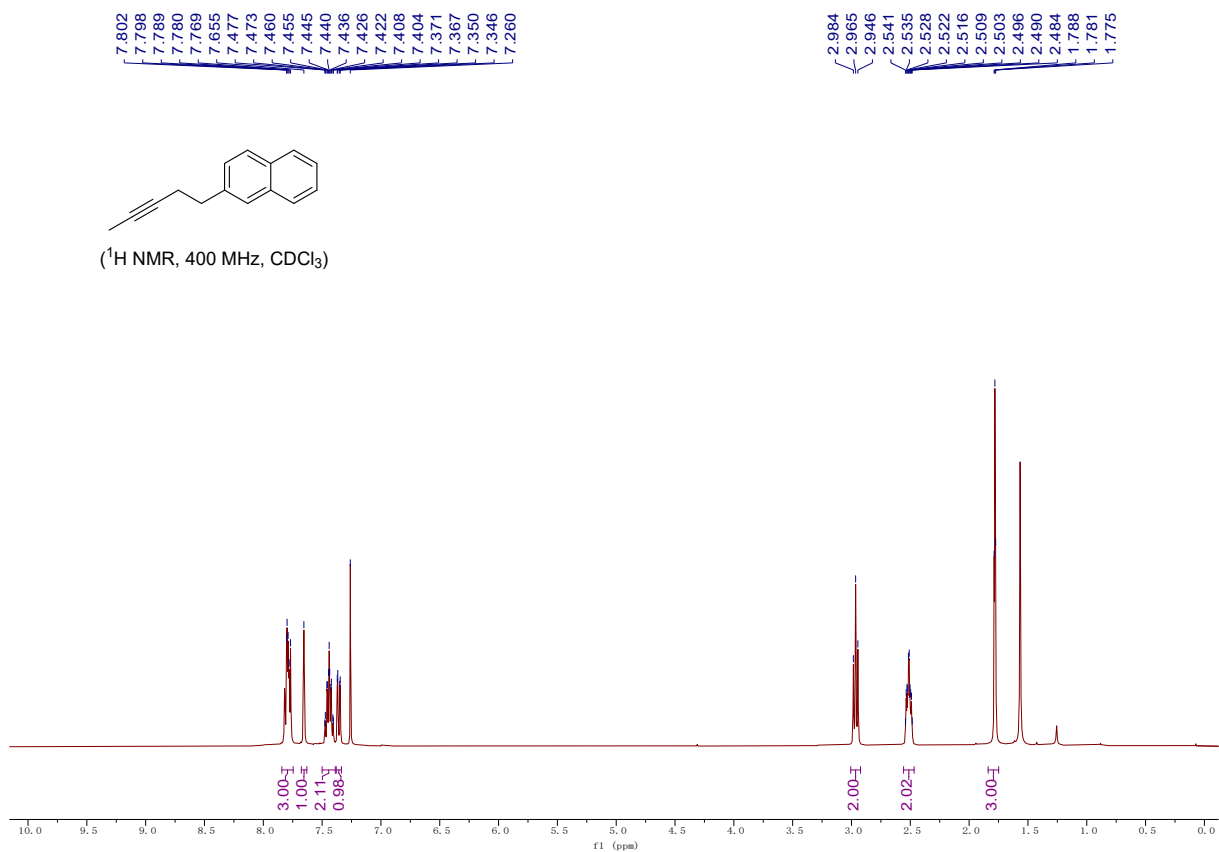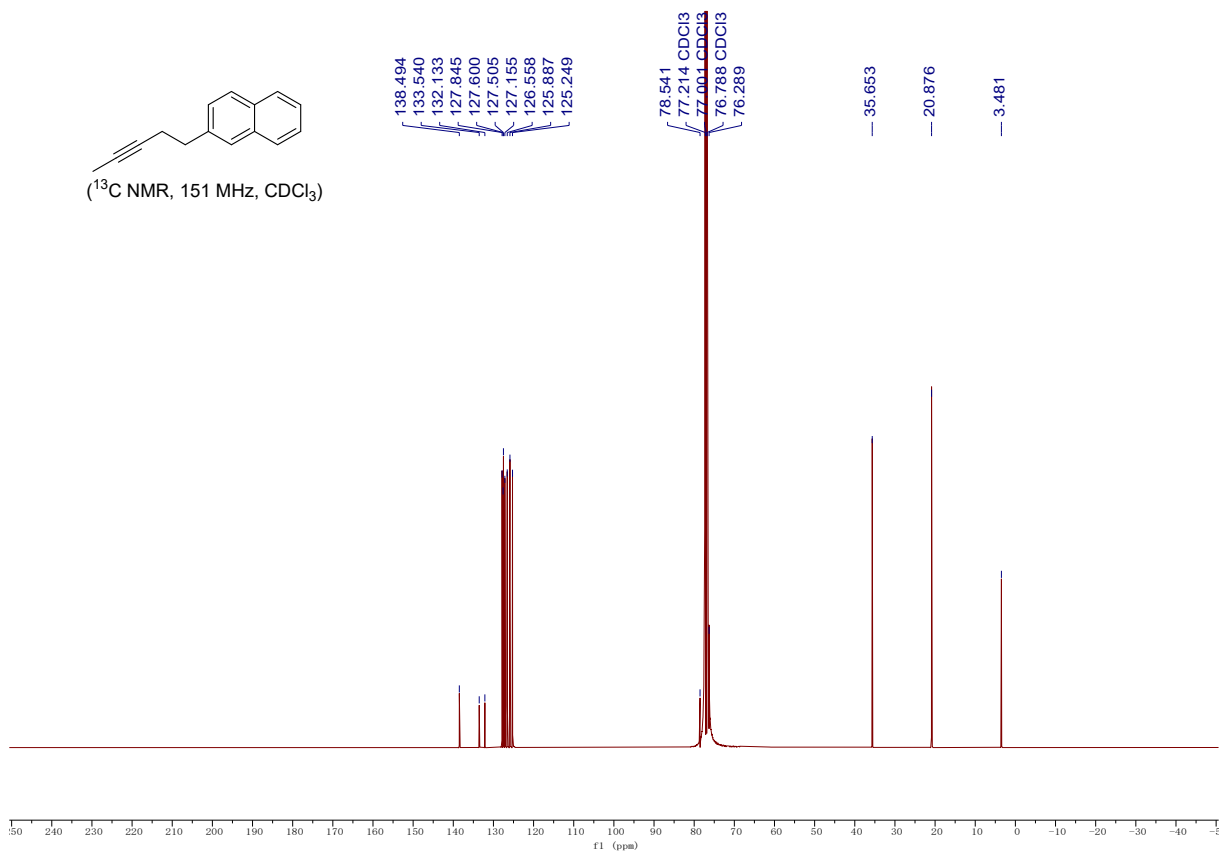

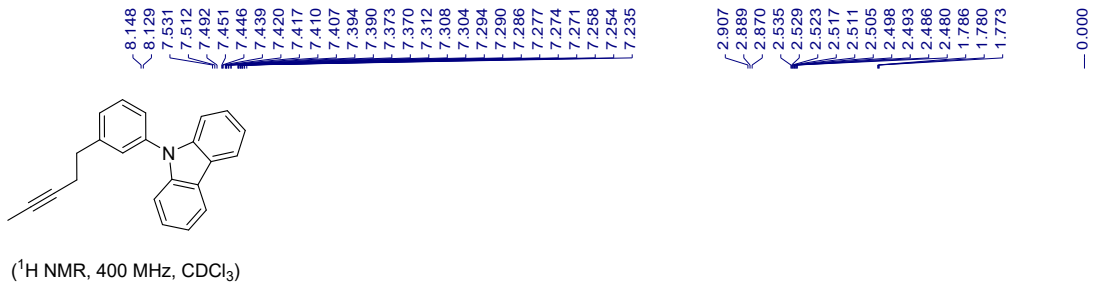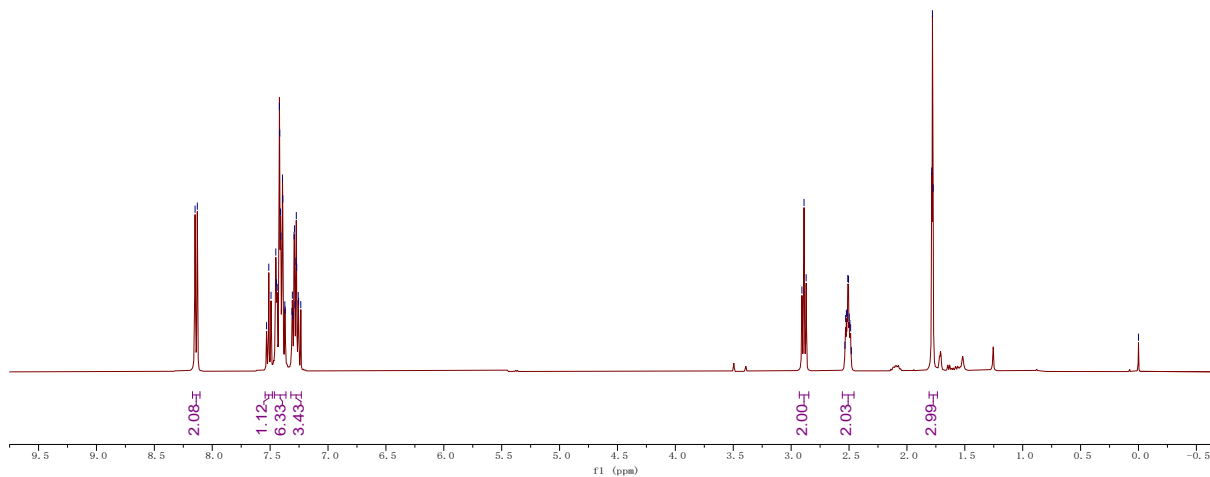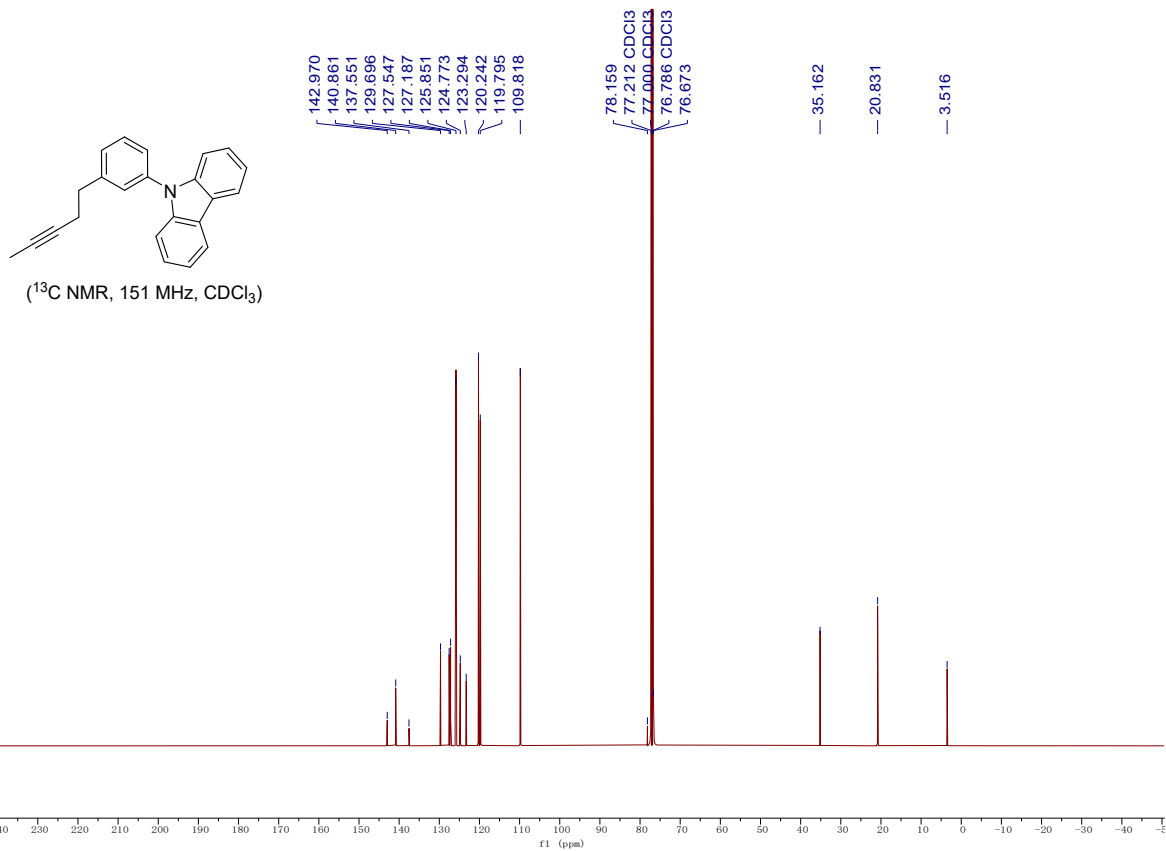



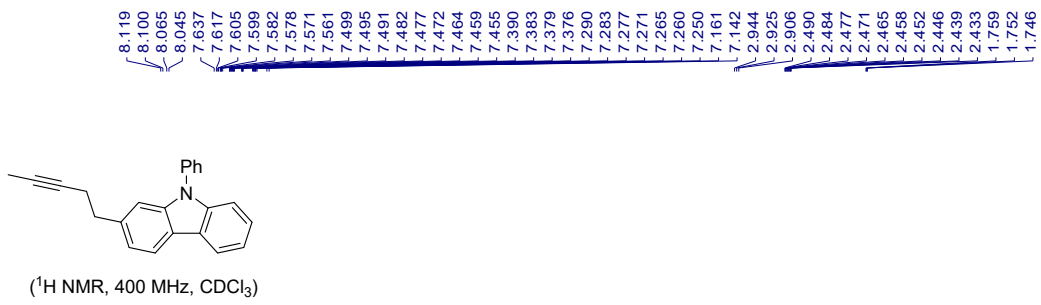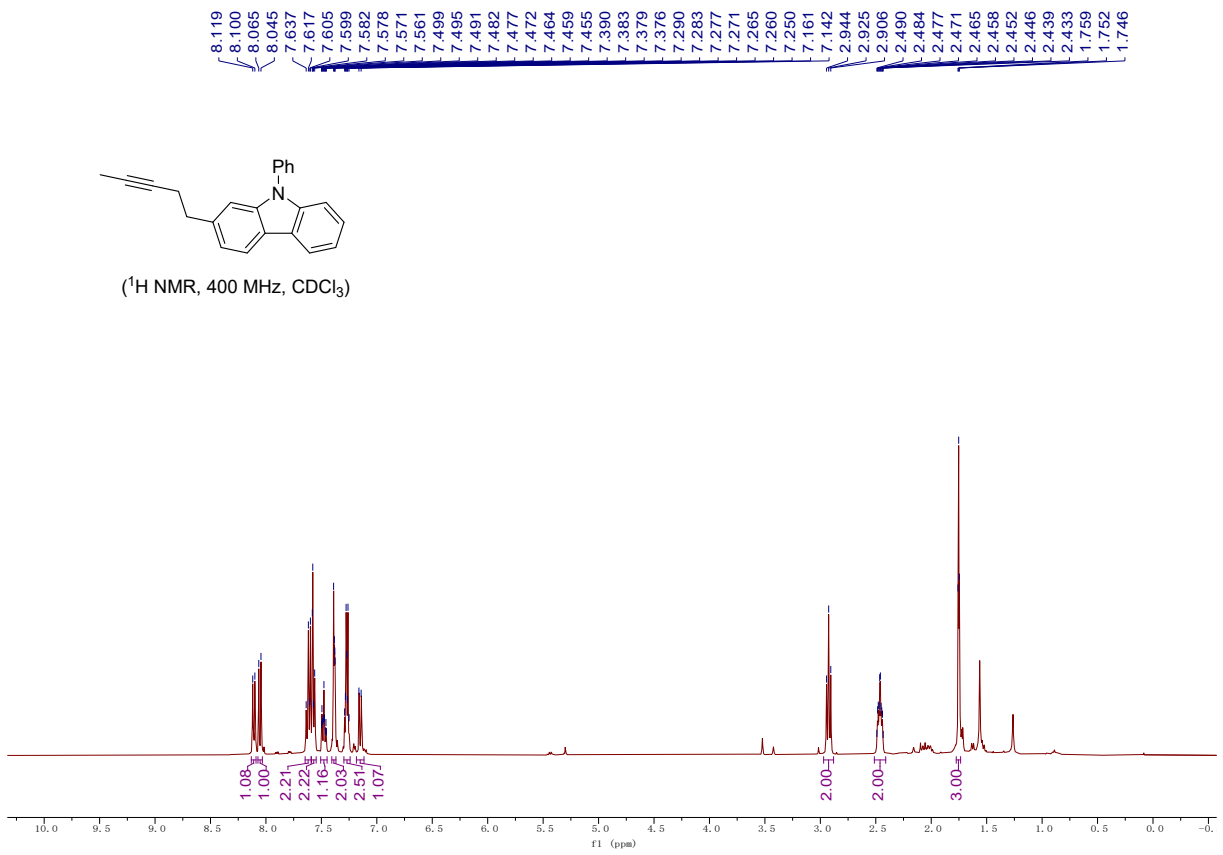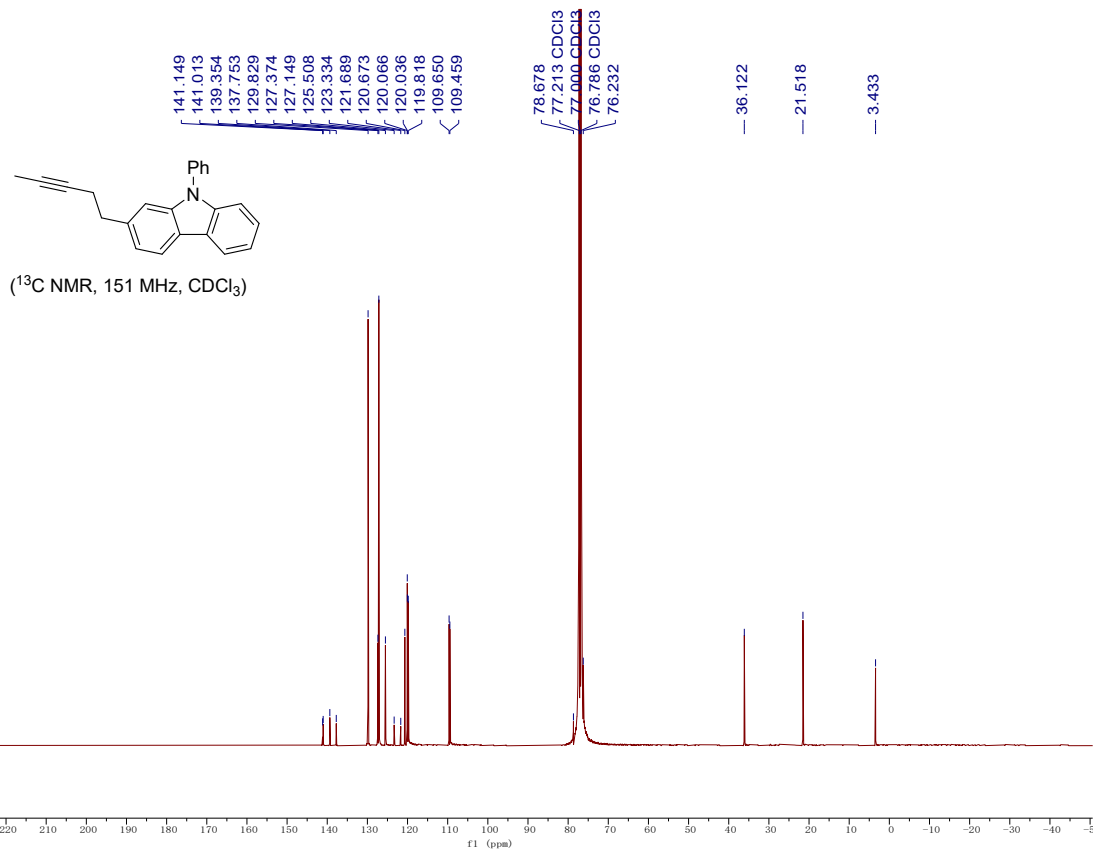

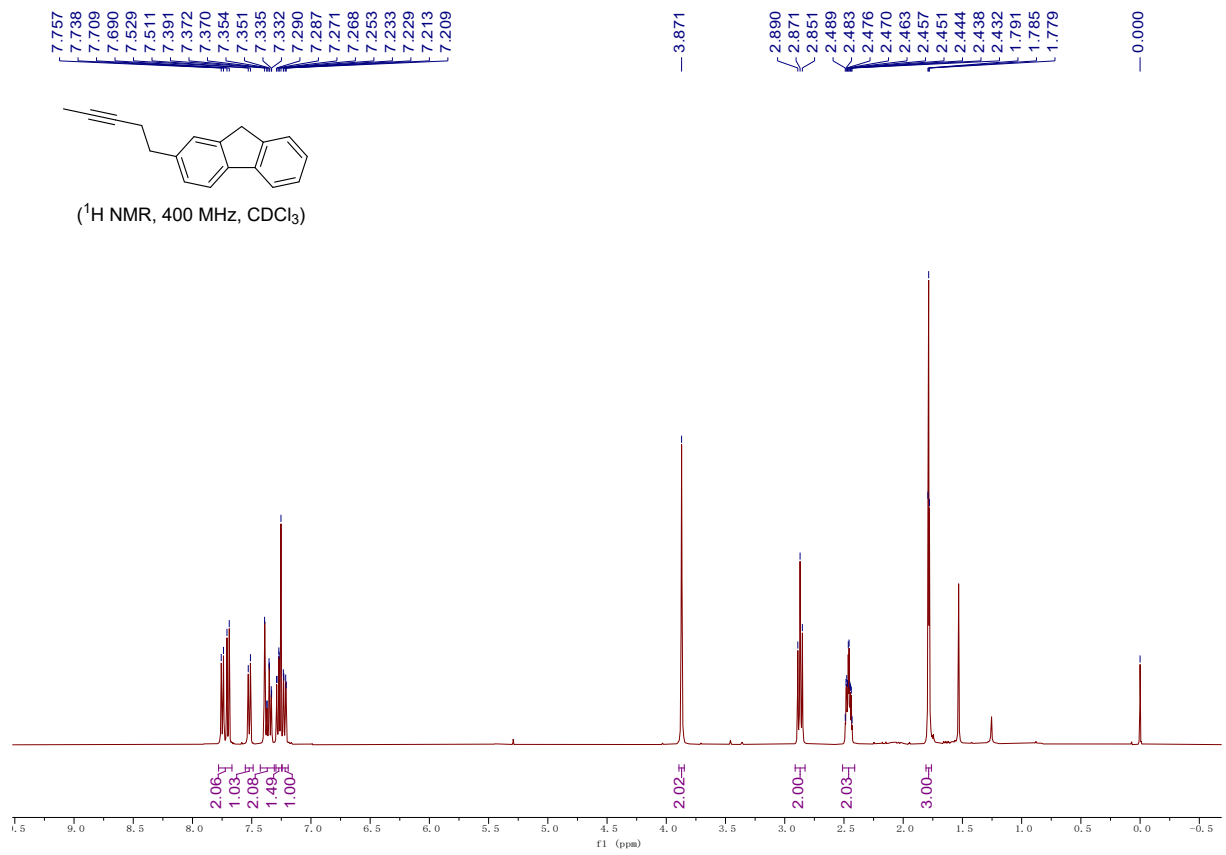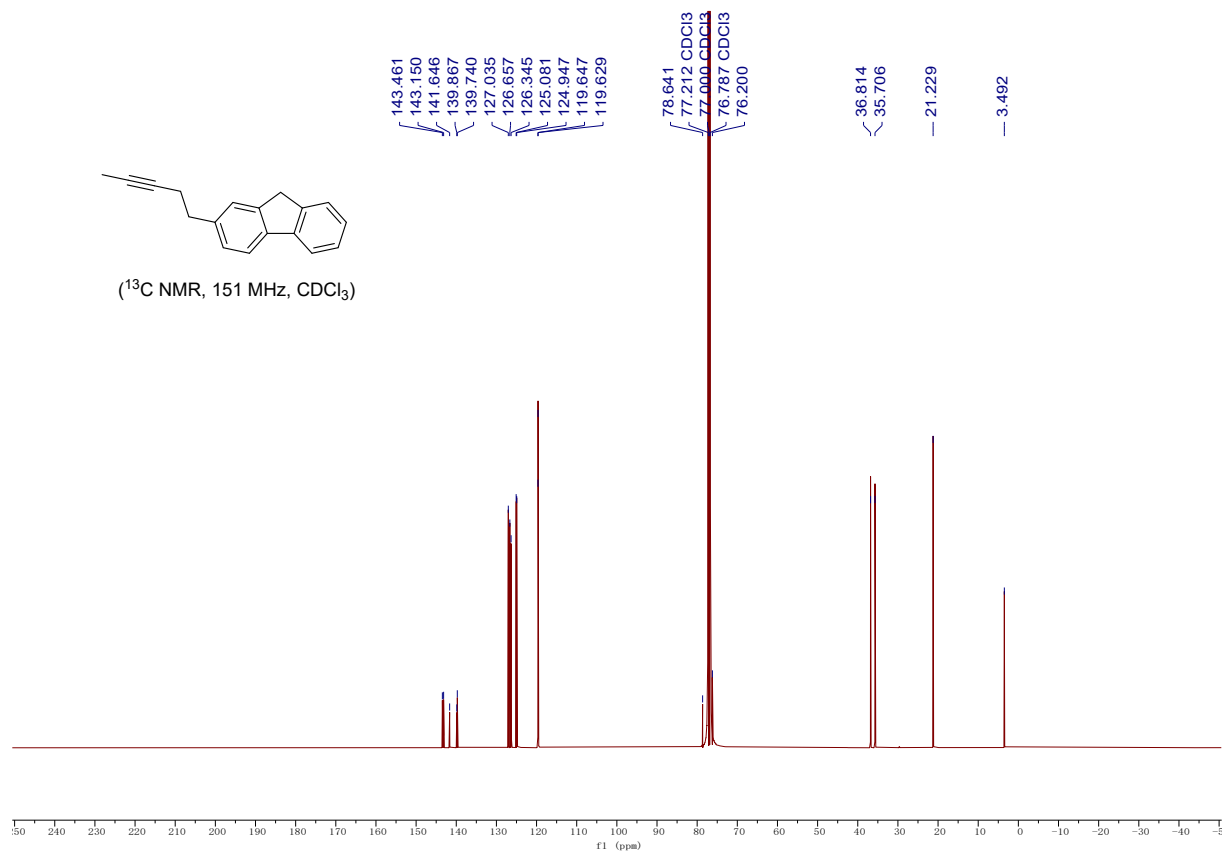

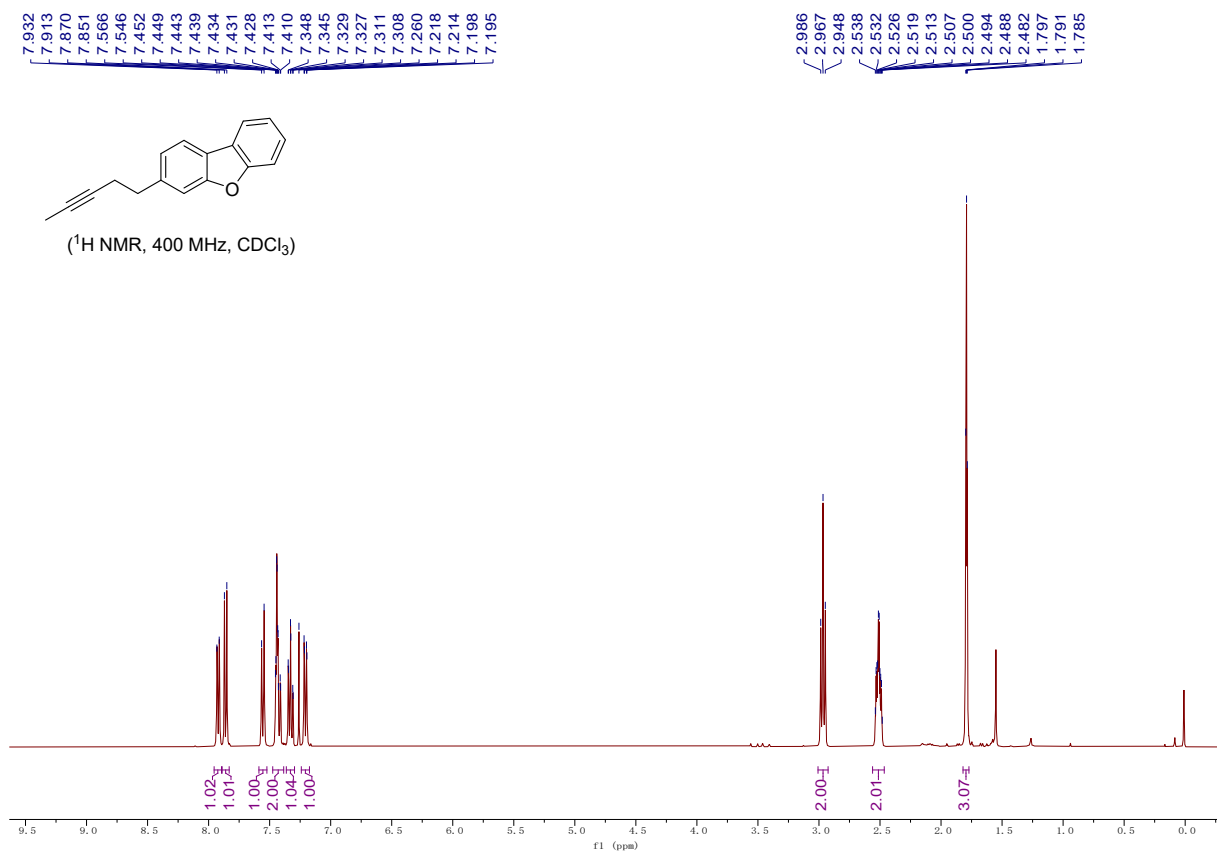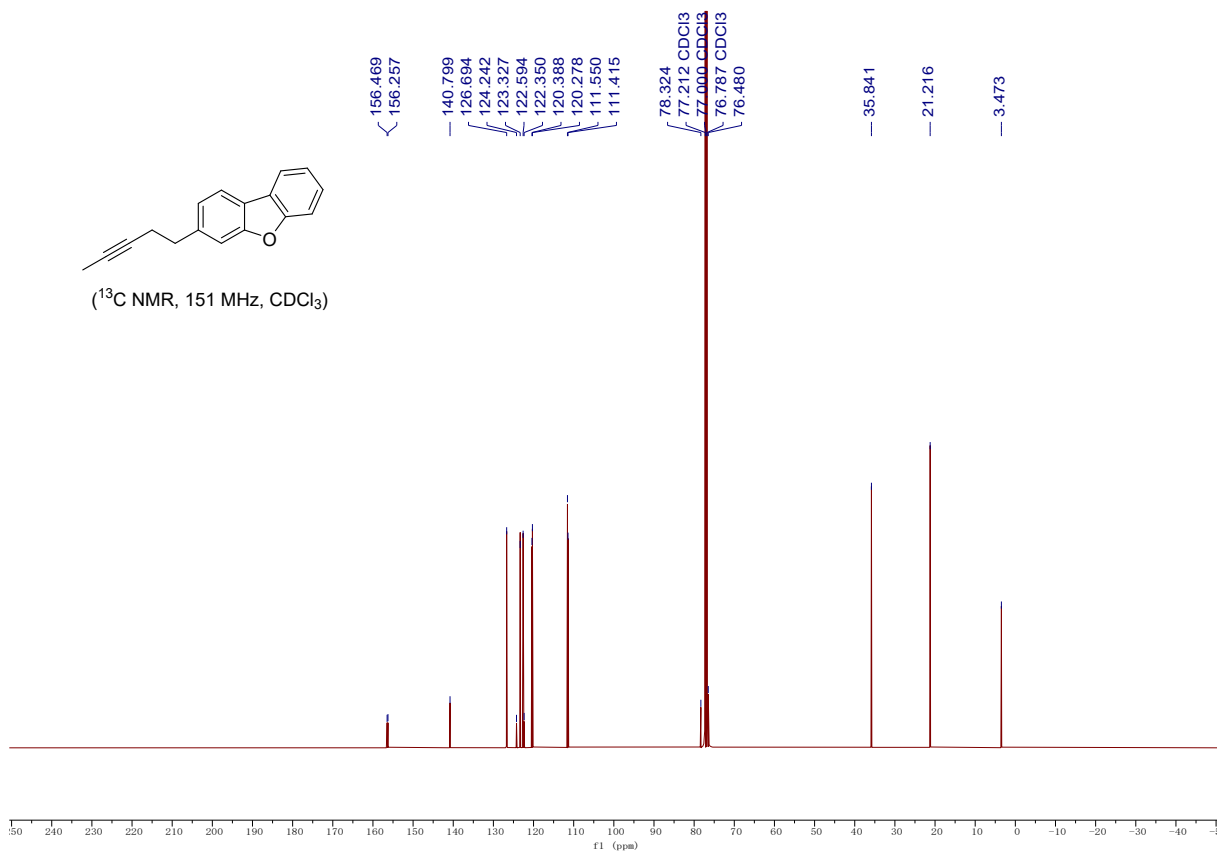

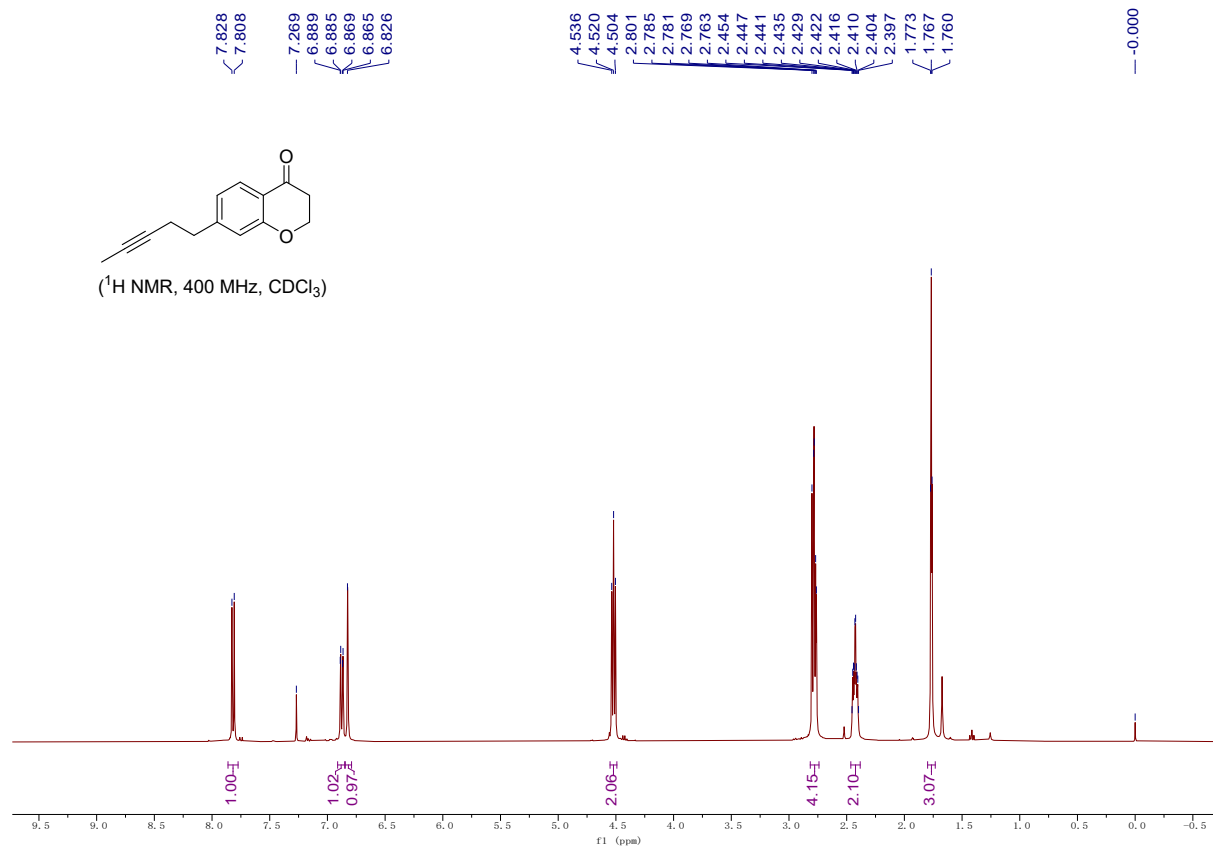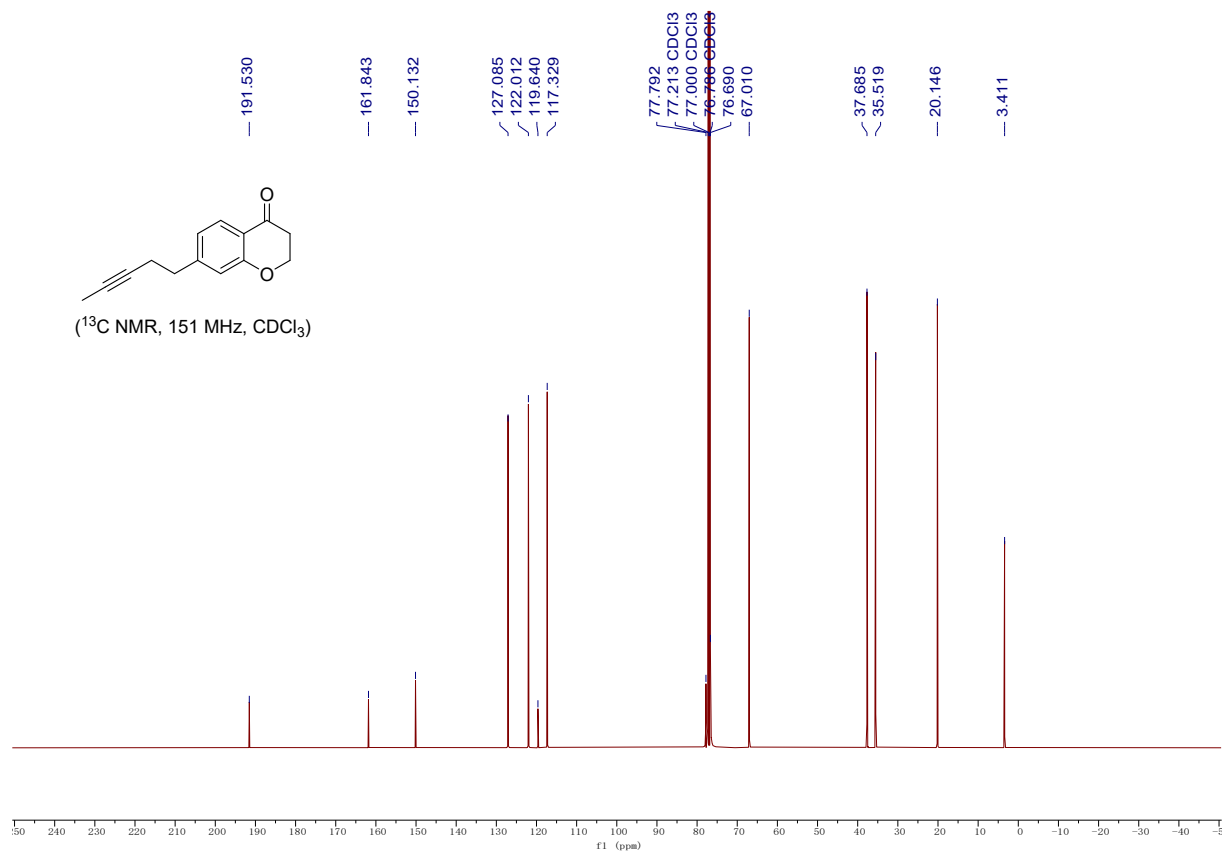

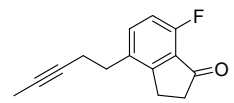

(<sup>1</sup>H NMR, 400 MHz, CDCl<sub>3</sub>)

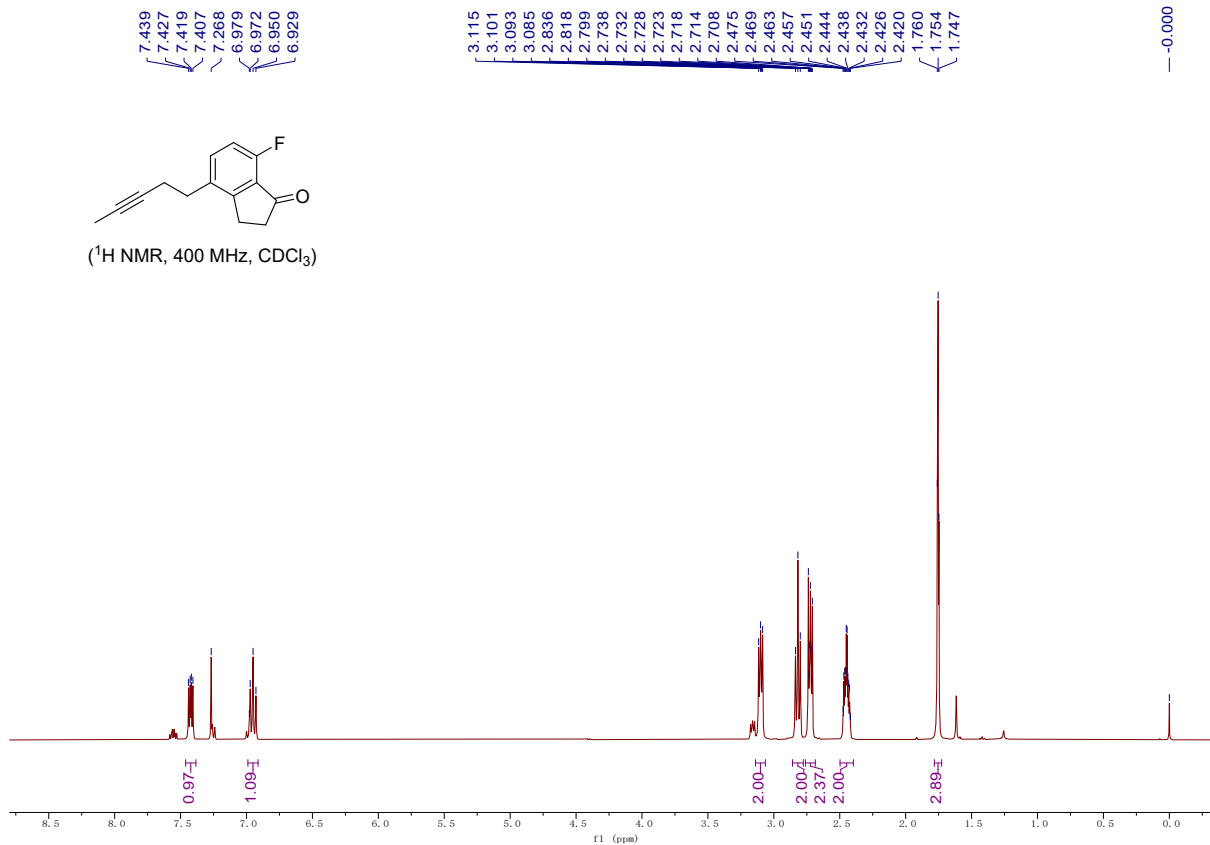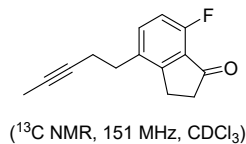

(<sup>13</sup>C NMR, 151 MHz, CDCl<sub>3</sub>)

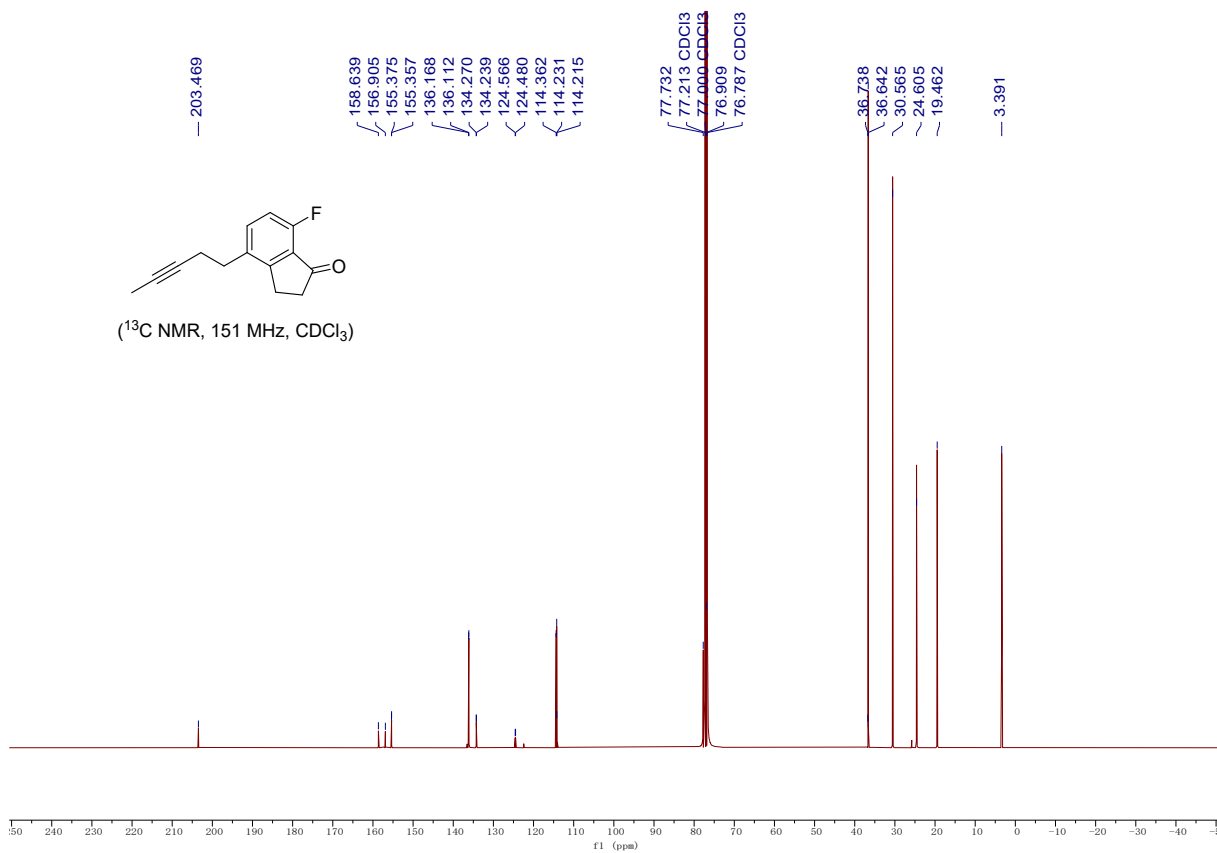

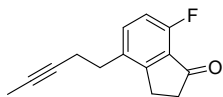

(<sup>19</sup>F NMR, 565 MHz, CDCl<sub>3</sub>)

-119.073

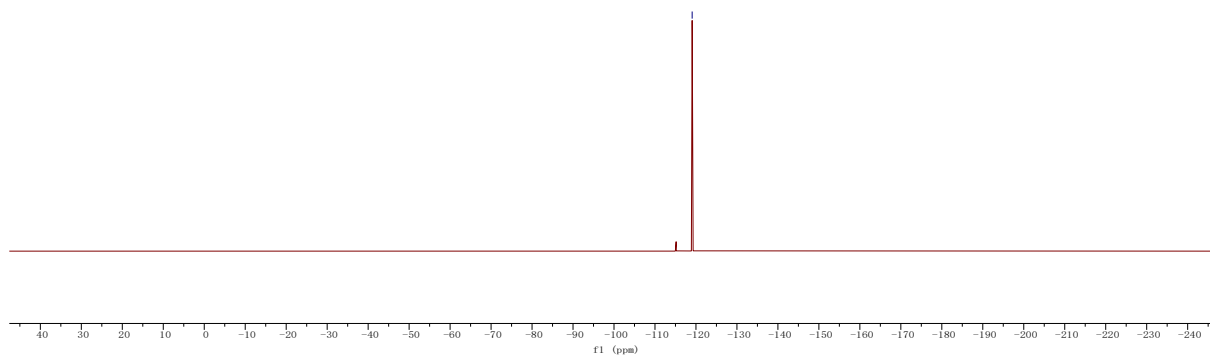

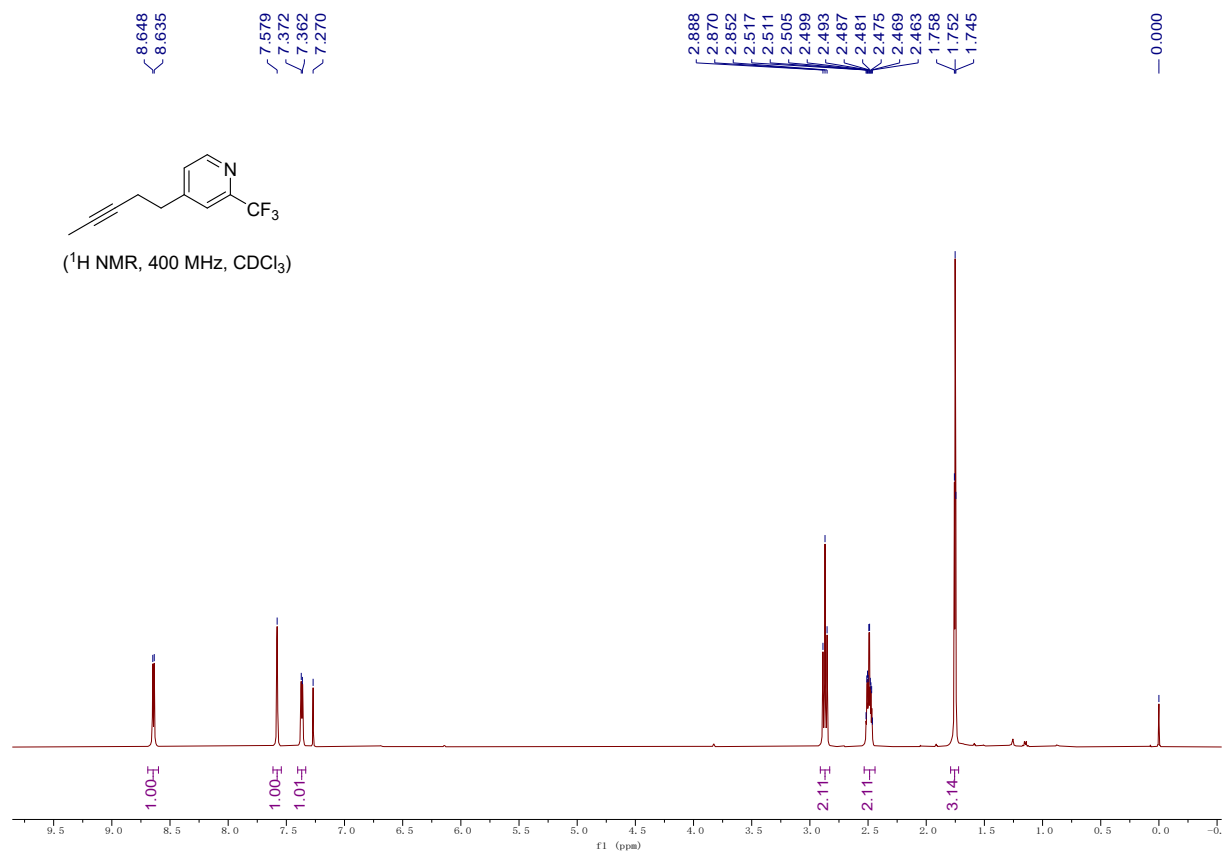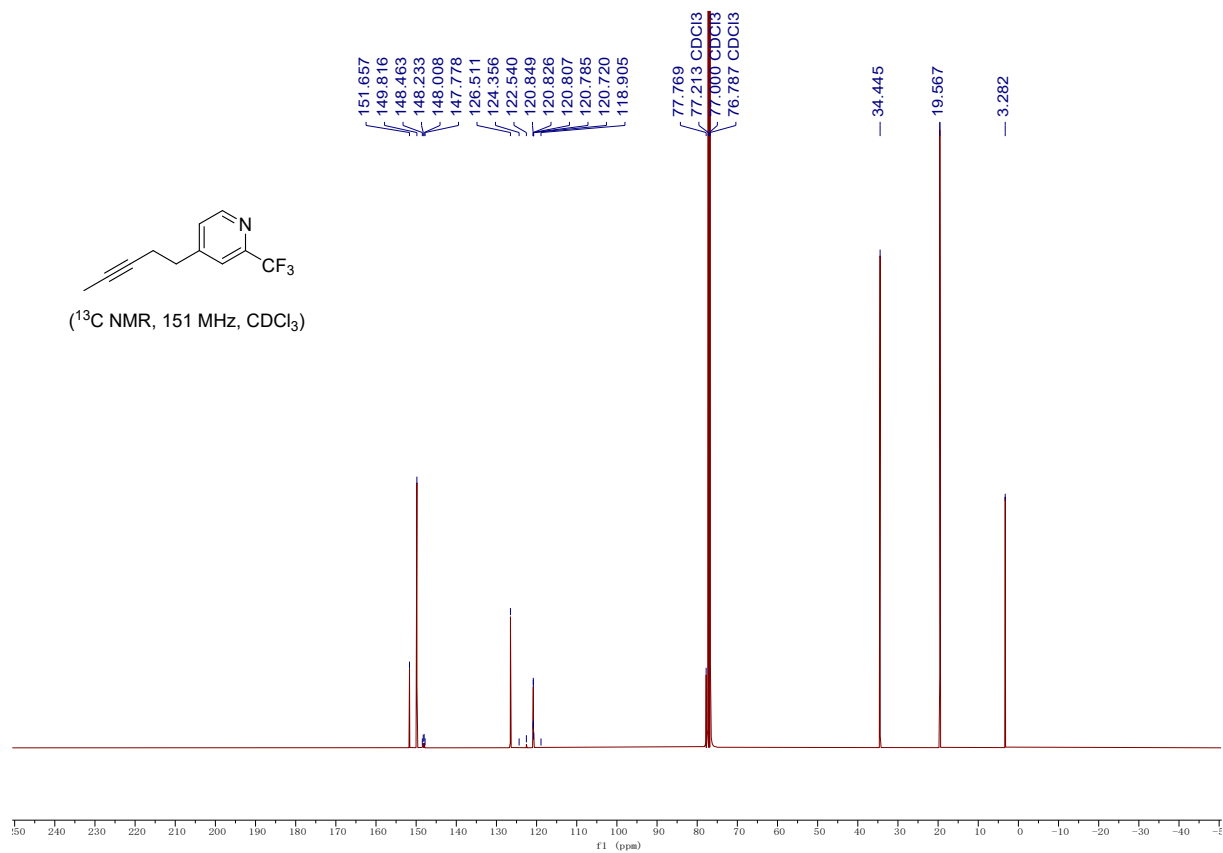





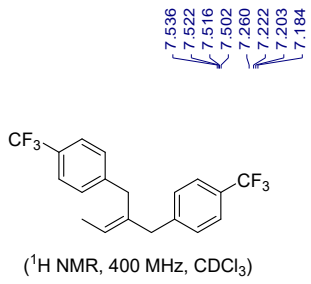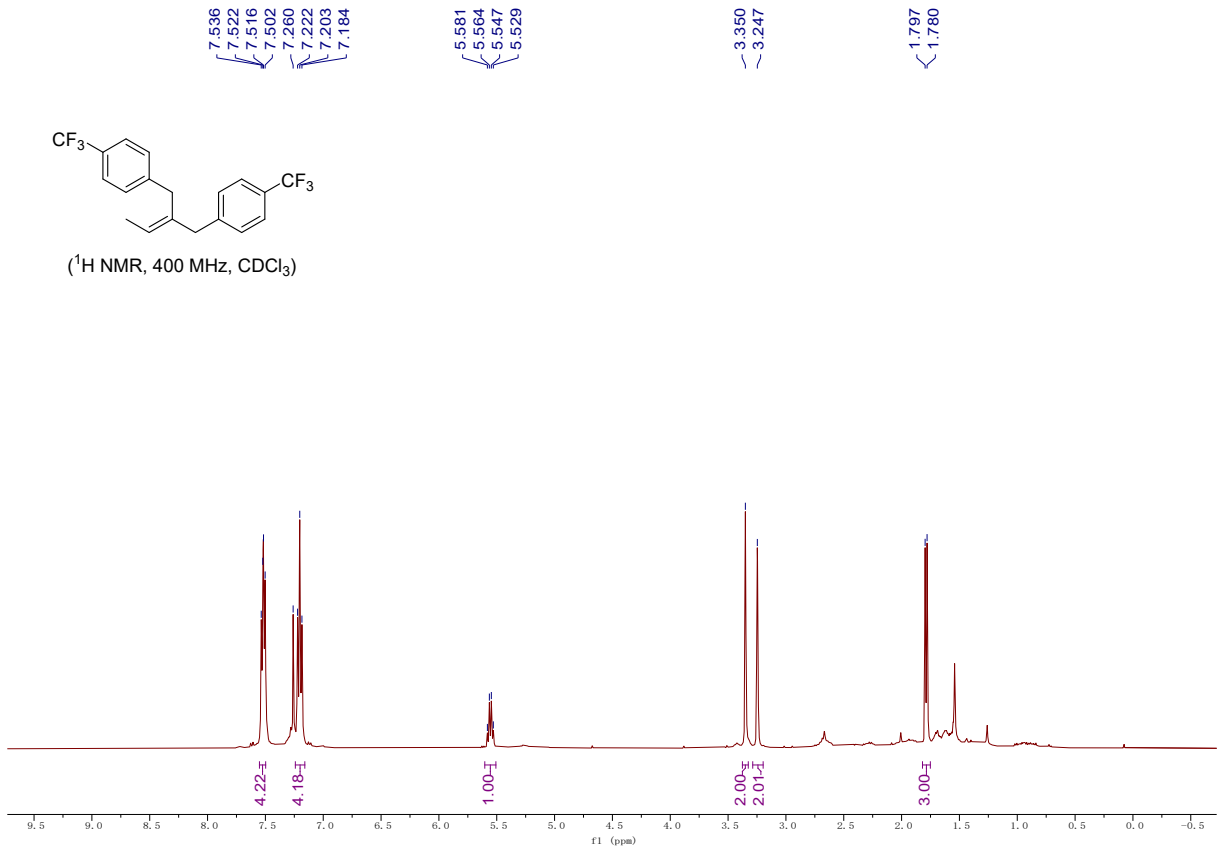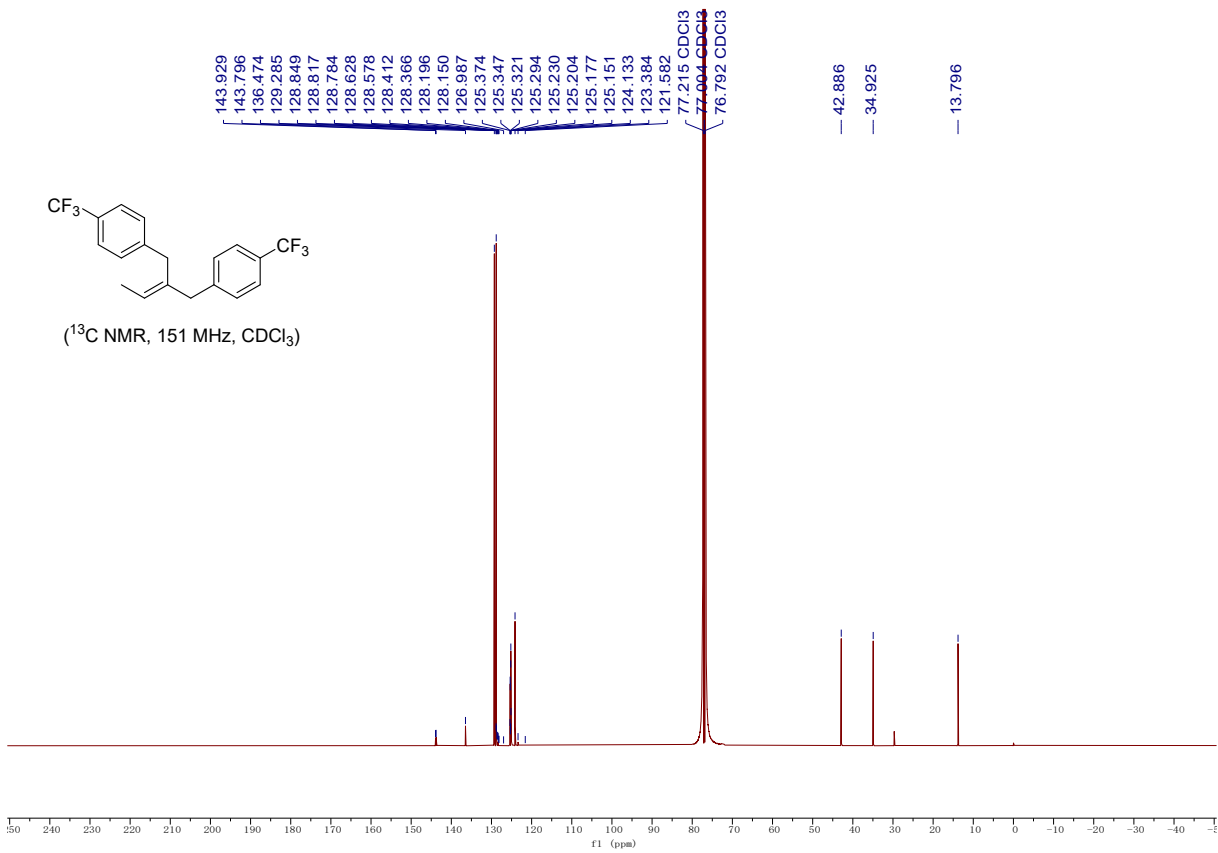

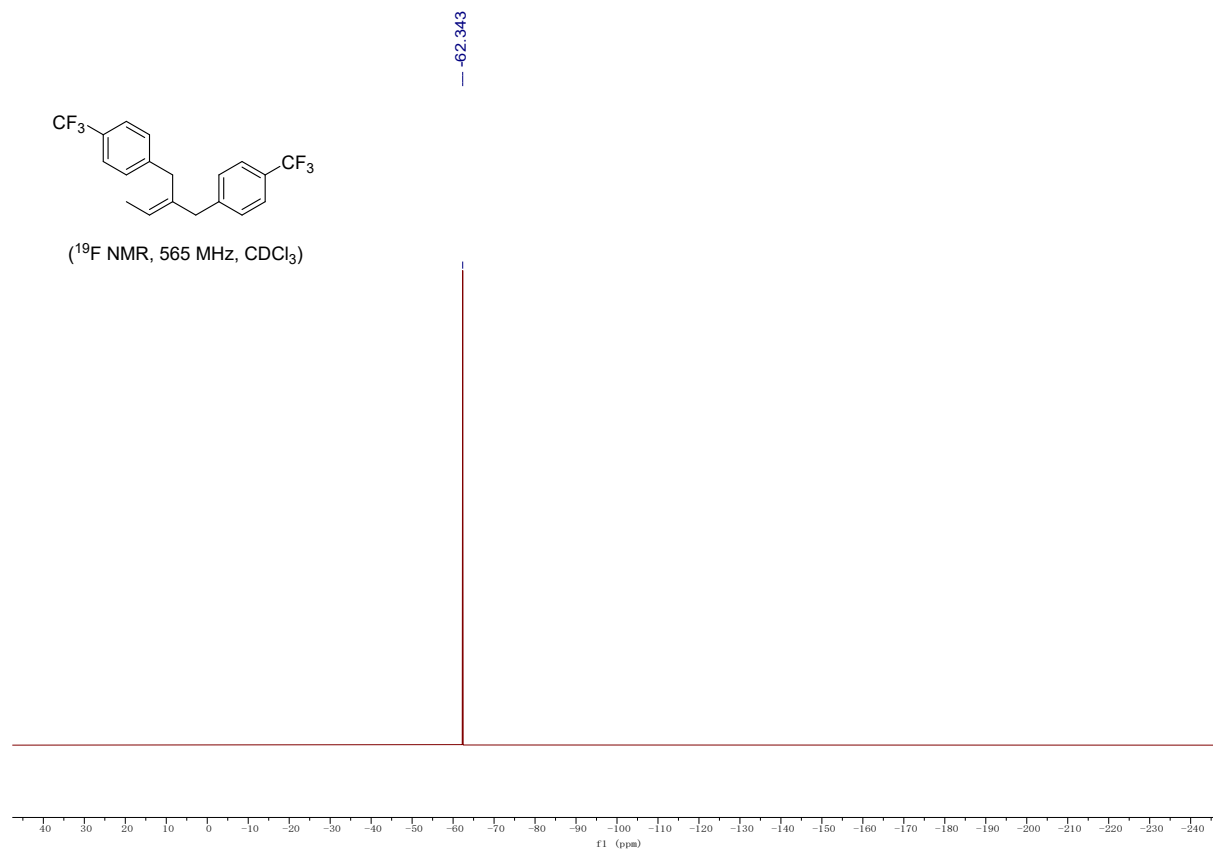

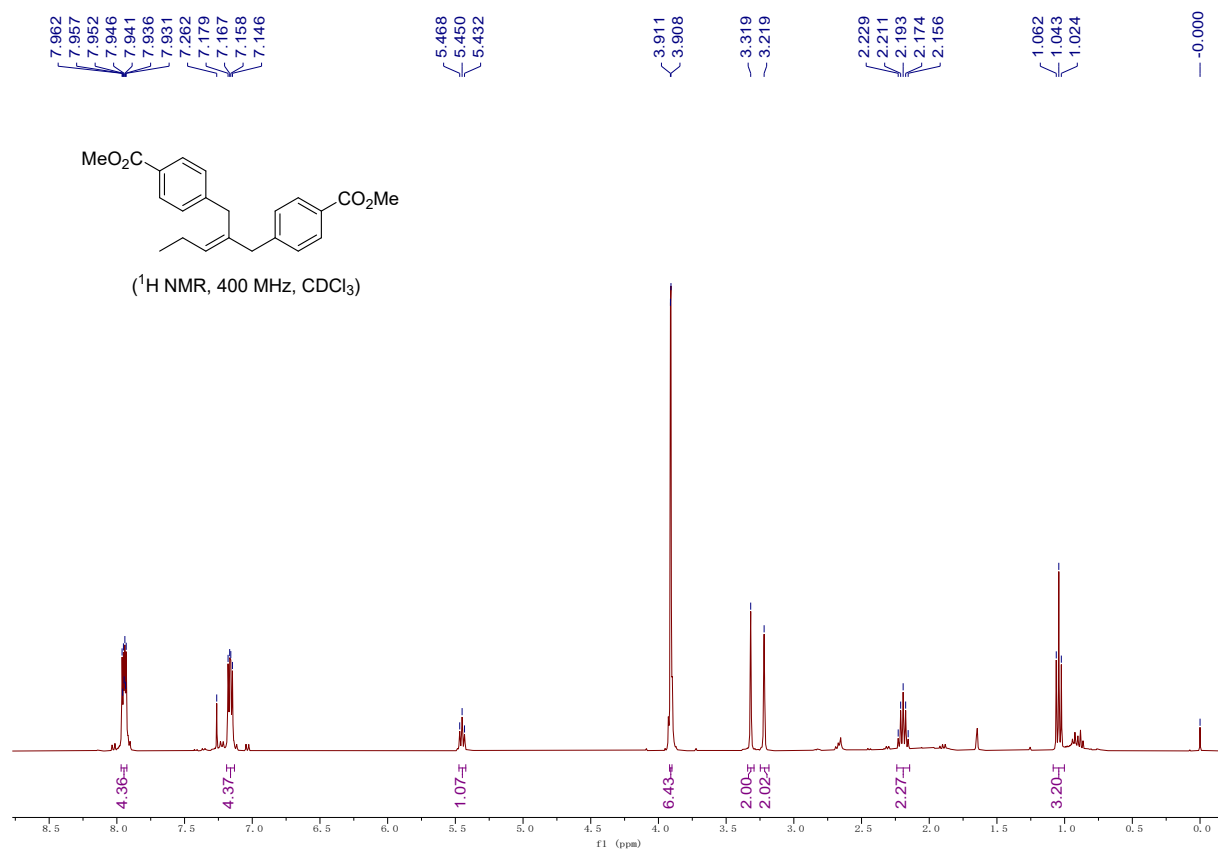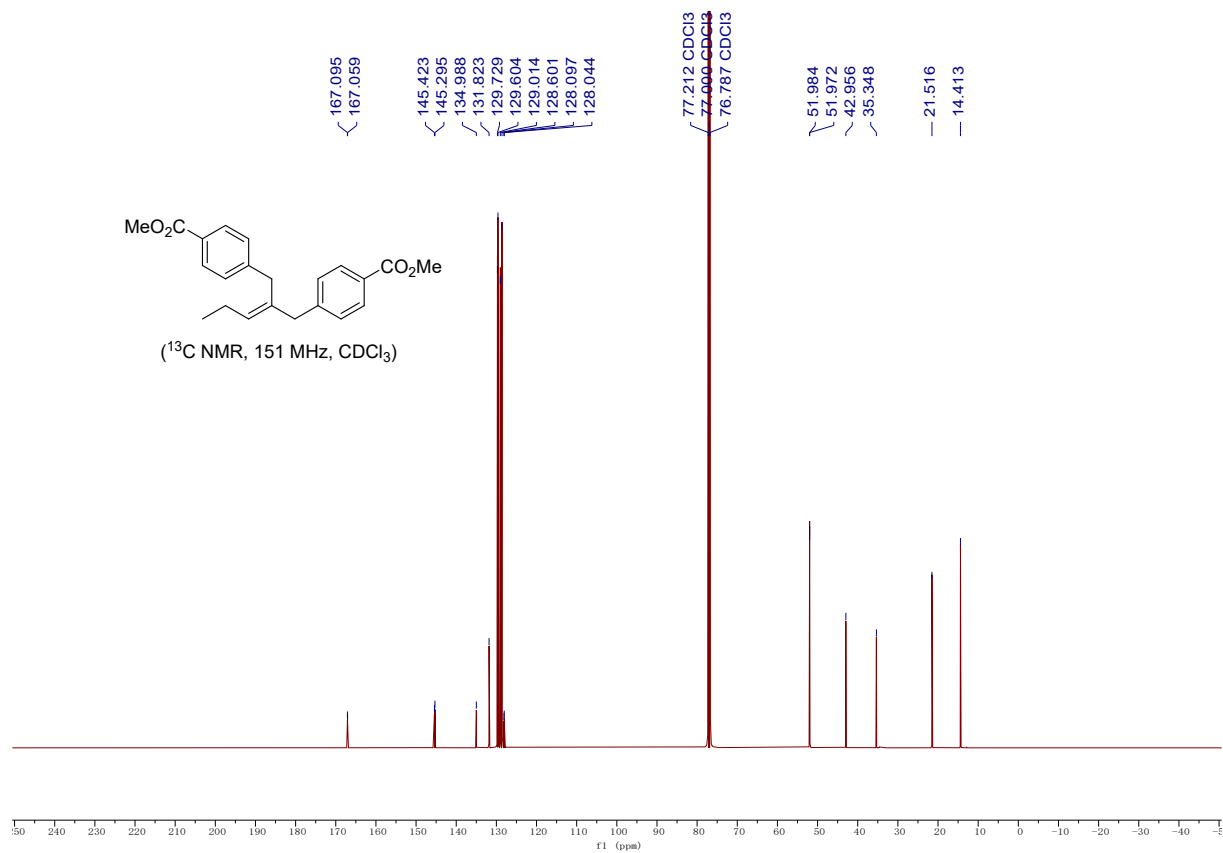

**Containing a trace amount of impurity that failed to be separated.**

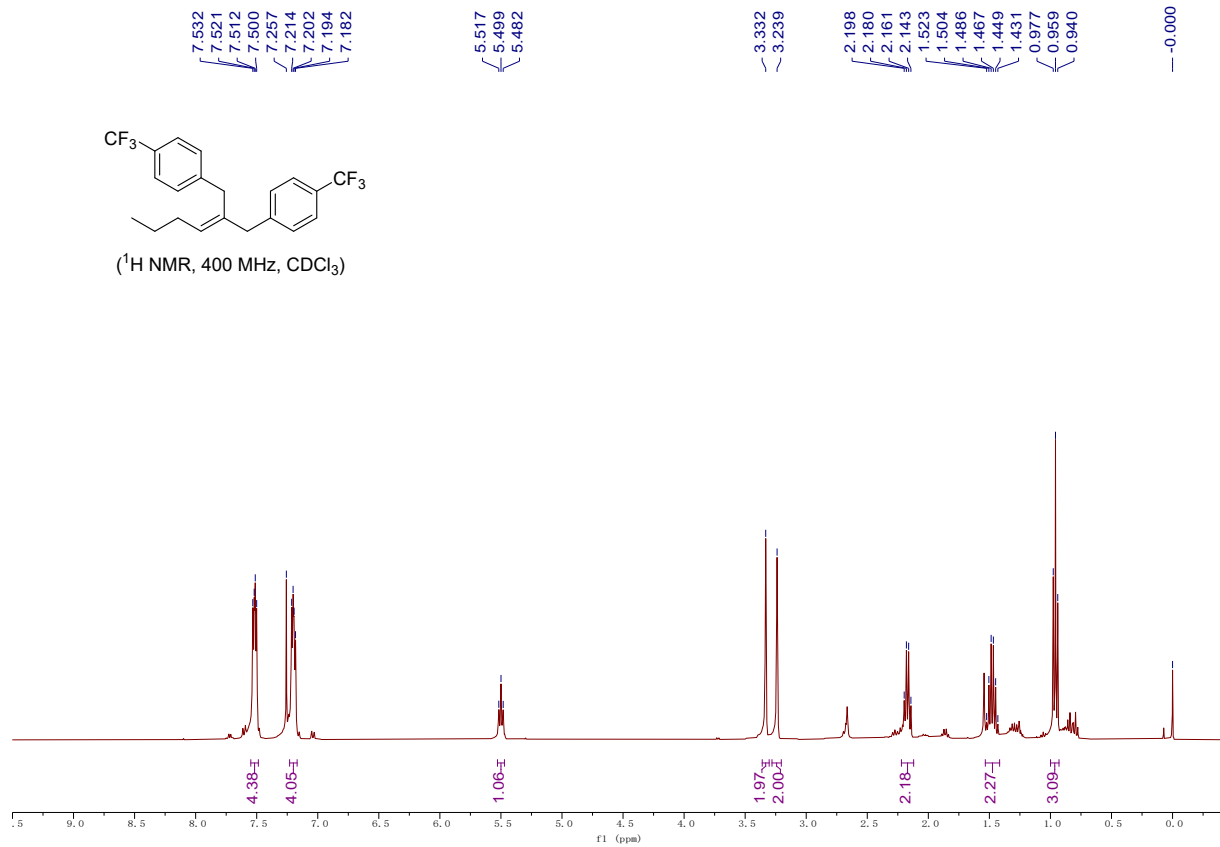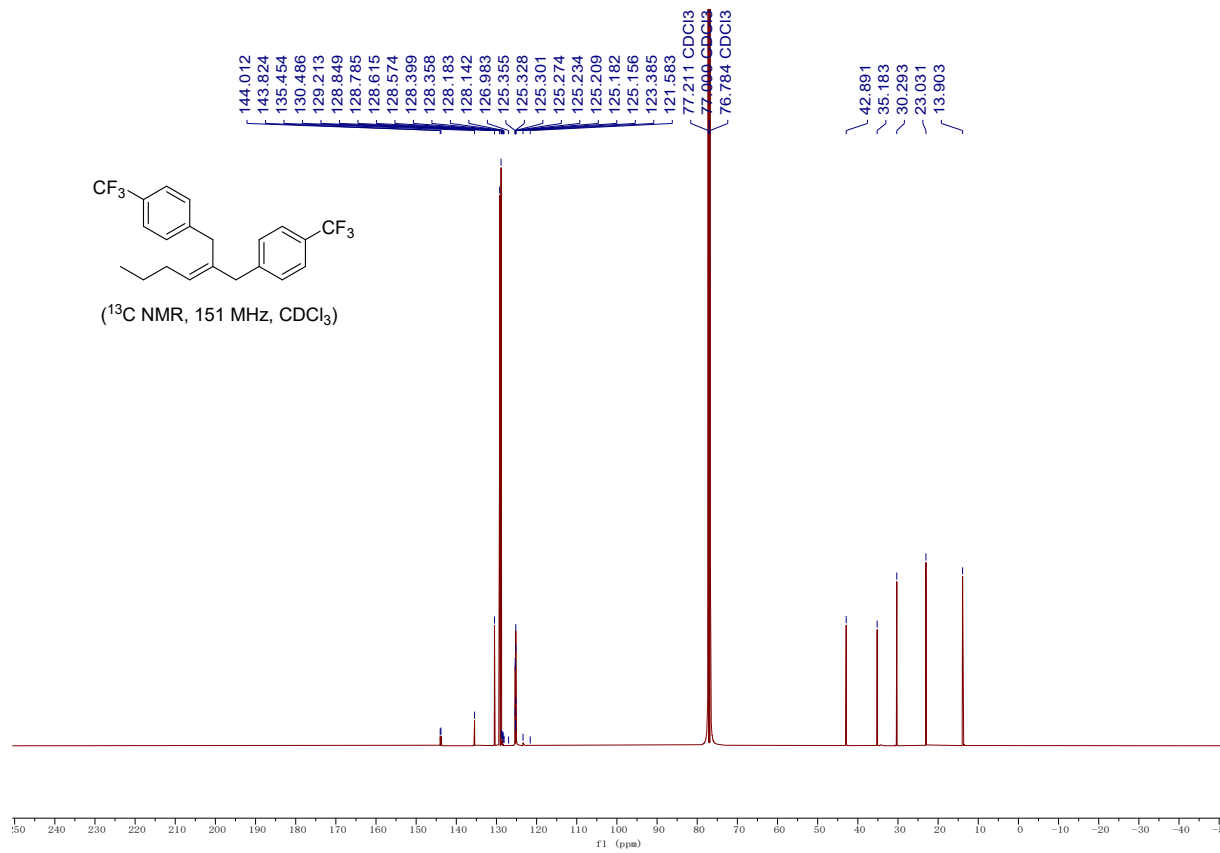

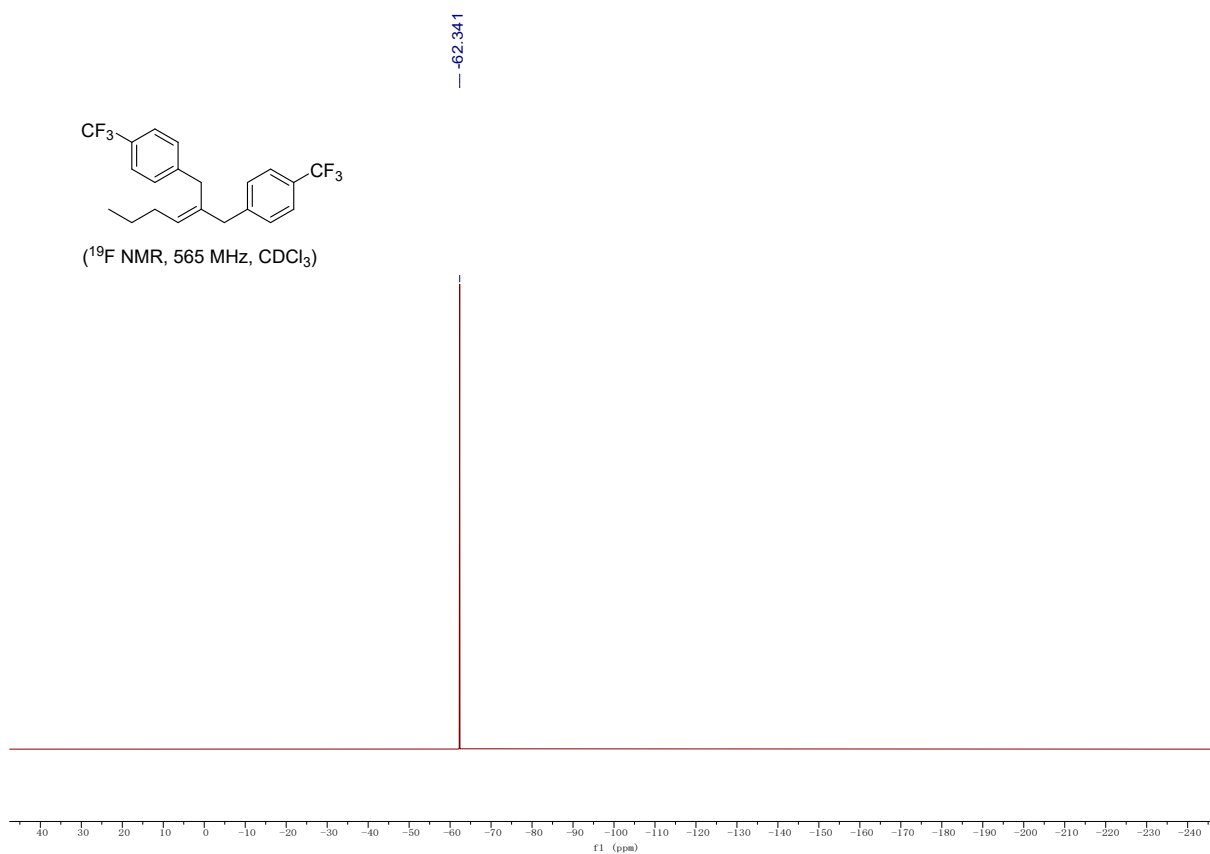

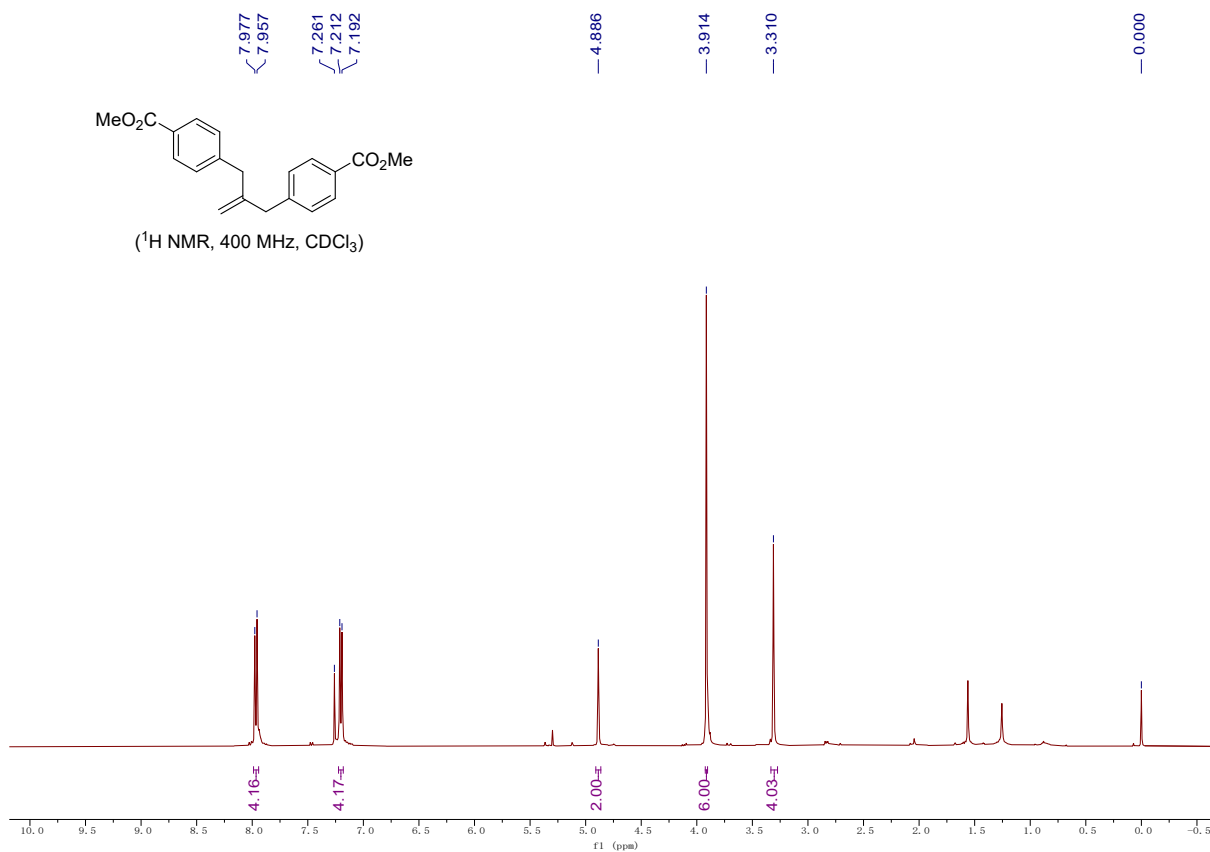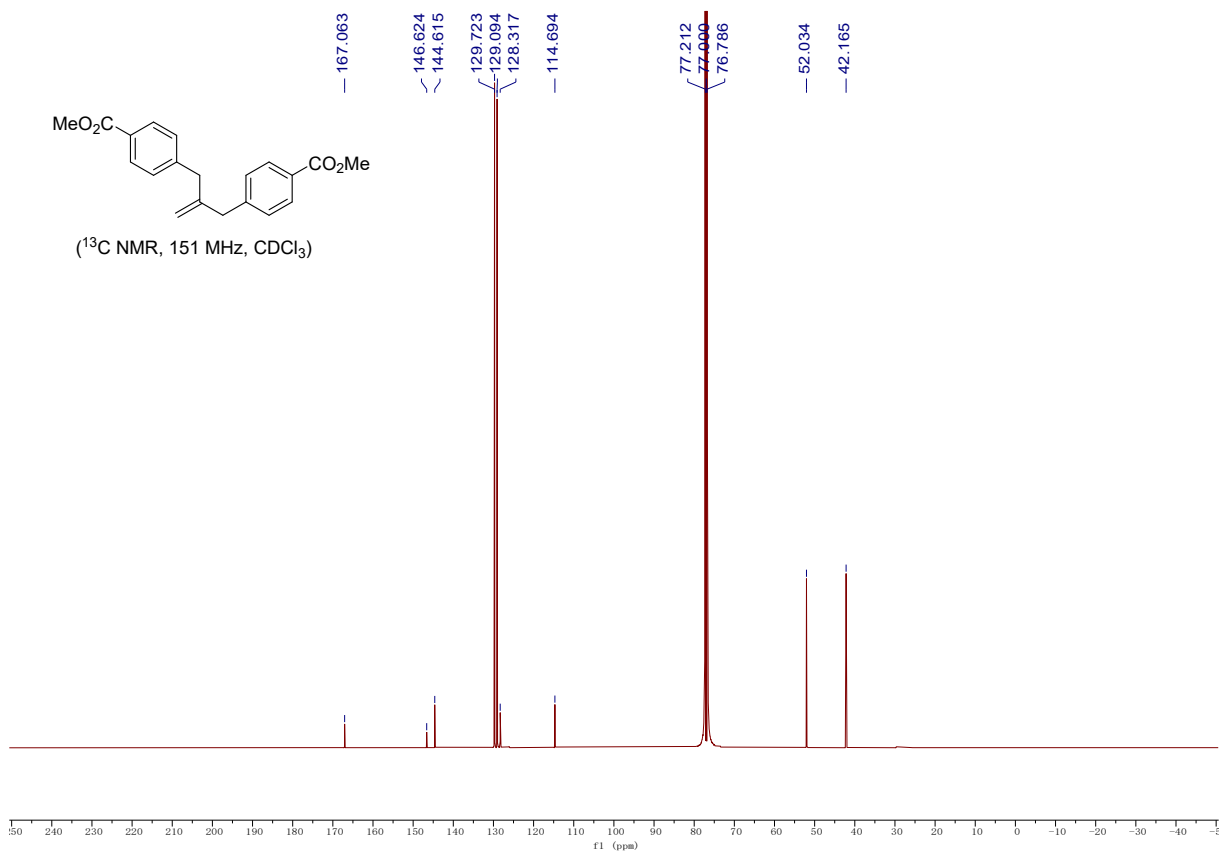

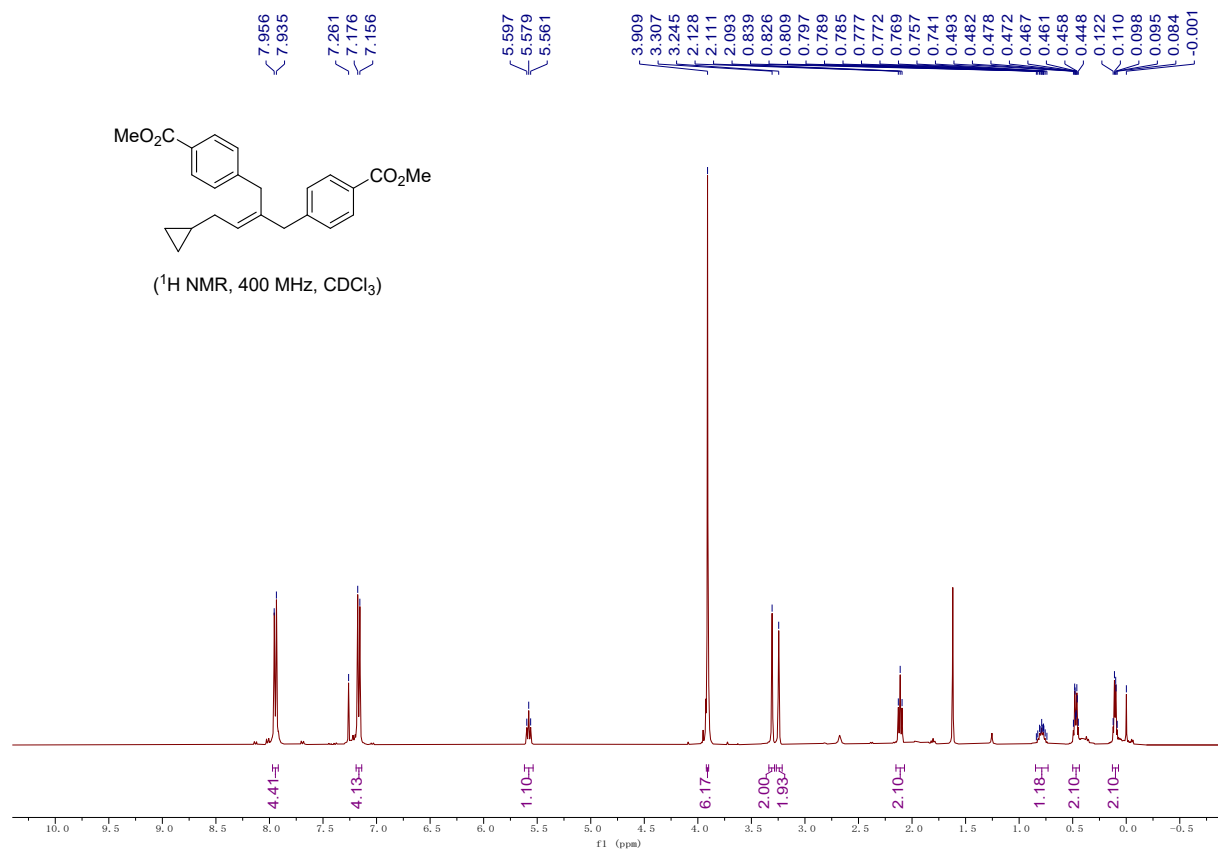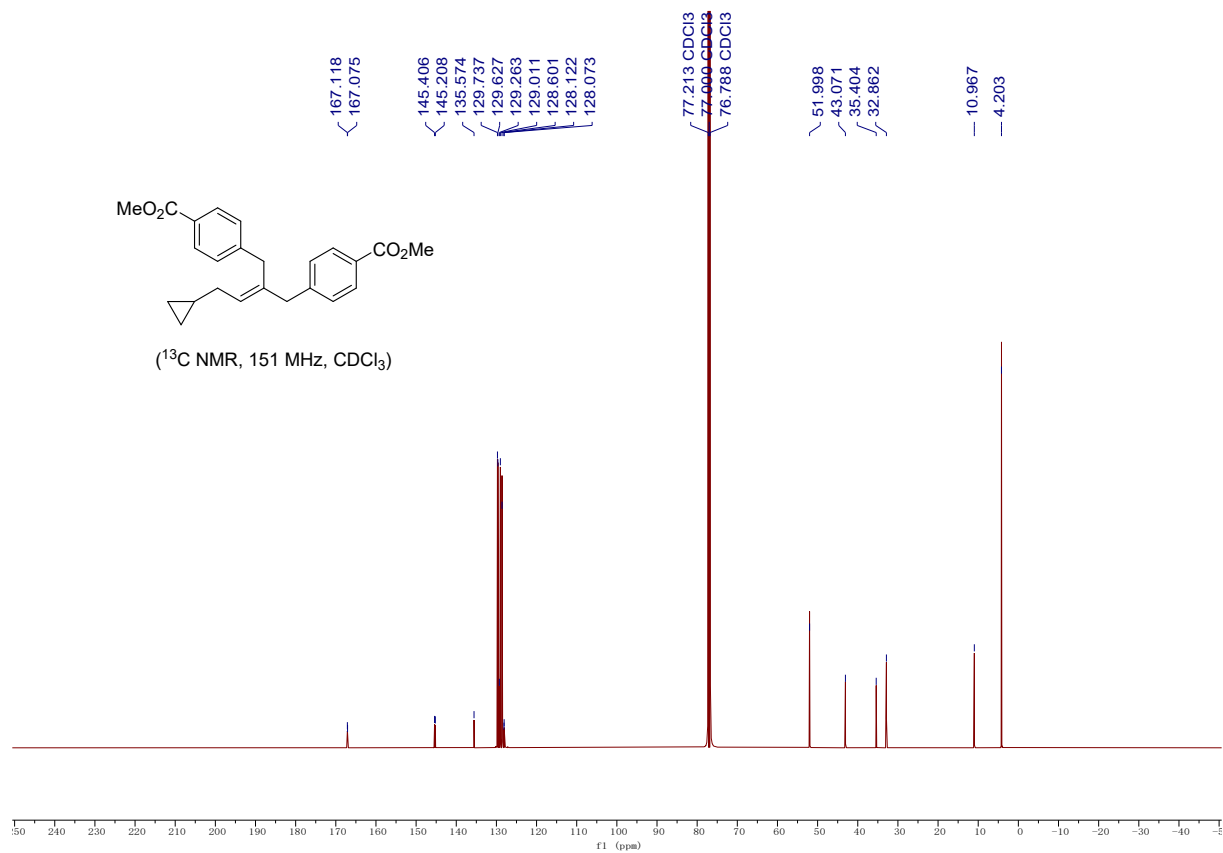

7.536  
7.529  
7.516  
7.508  
7.258  
7.218  
7.210  
7.197  
7.190  
5.923  
5.908  
5.898  
5.892  
5.882  
5.865  
5.855  
5.850  
5.840  
5.824  
5.840  
5.521  
5.503  
5.113  
5.109  
5.104  
5.100  
5.070  
5.066  
5.061  
5.057  
5.044  
5.040  
5.036  
5.032  
3.348  
3.266  
2.972  
2.957  
2.953  
2.838

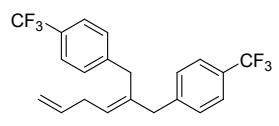

(<sup>1</sup>H NMR, 400 MHz, CDCl<sub>3</sub>)

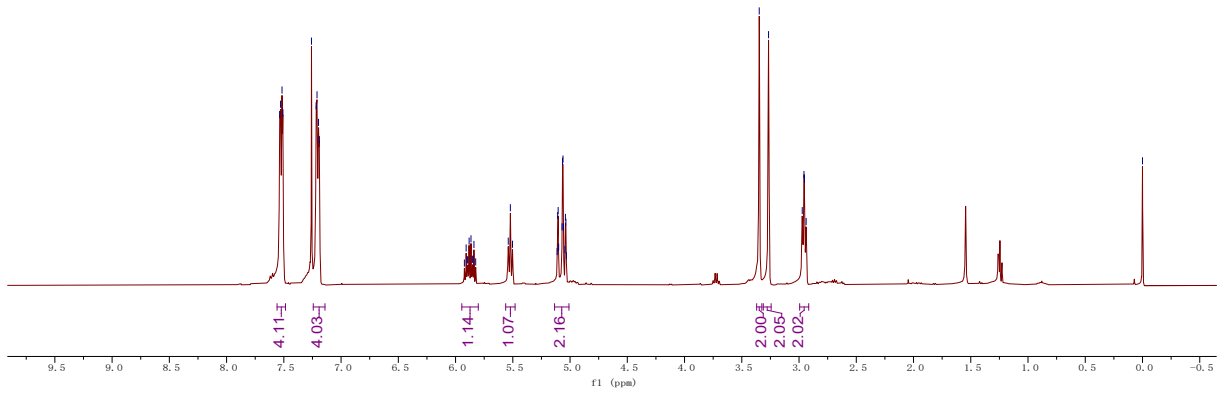

0.000

143.677  
143.447  
136.847  
136.442  
129.268  
128.895  
128.716  
128.684  
128.505  
128.473  
128.284  
128.256  
127.130  
126.951  
125.400  
125.375  
125.350  
125.264  
125.237  
125.211  
123.348  
121.546  
115.240  
77.211  
77.000  
76.784  
42.840  
35.202  
32.421

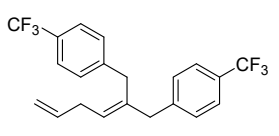

(<sup>13</sup>C NMR, 151 MHz, CDCl<sub>3</sub>)

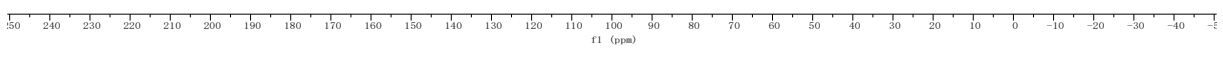



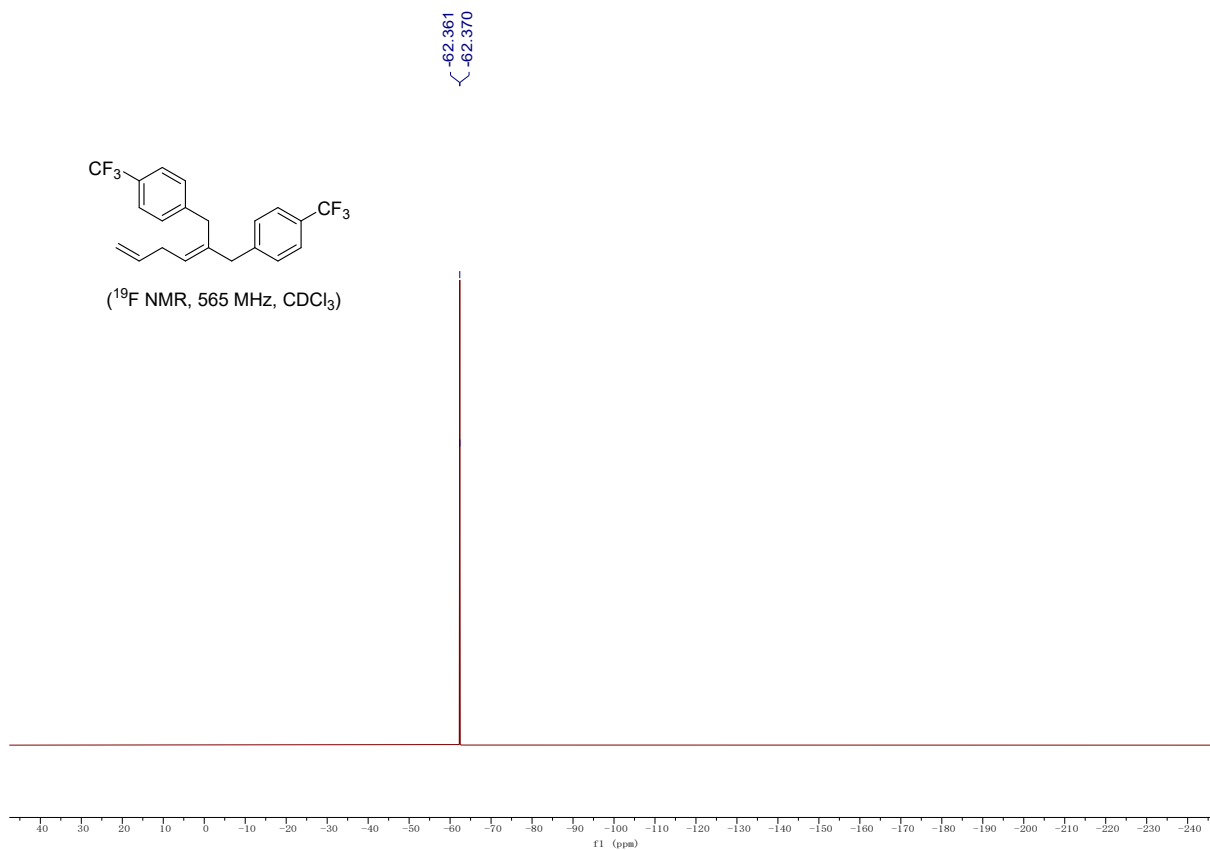

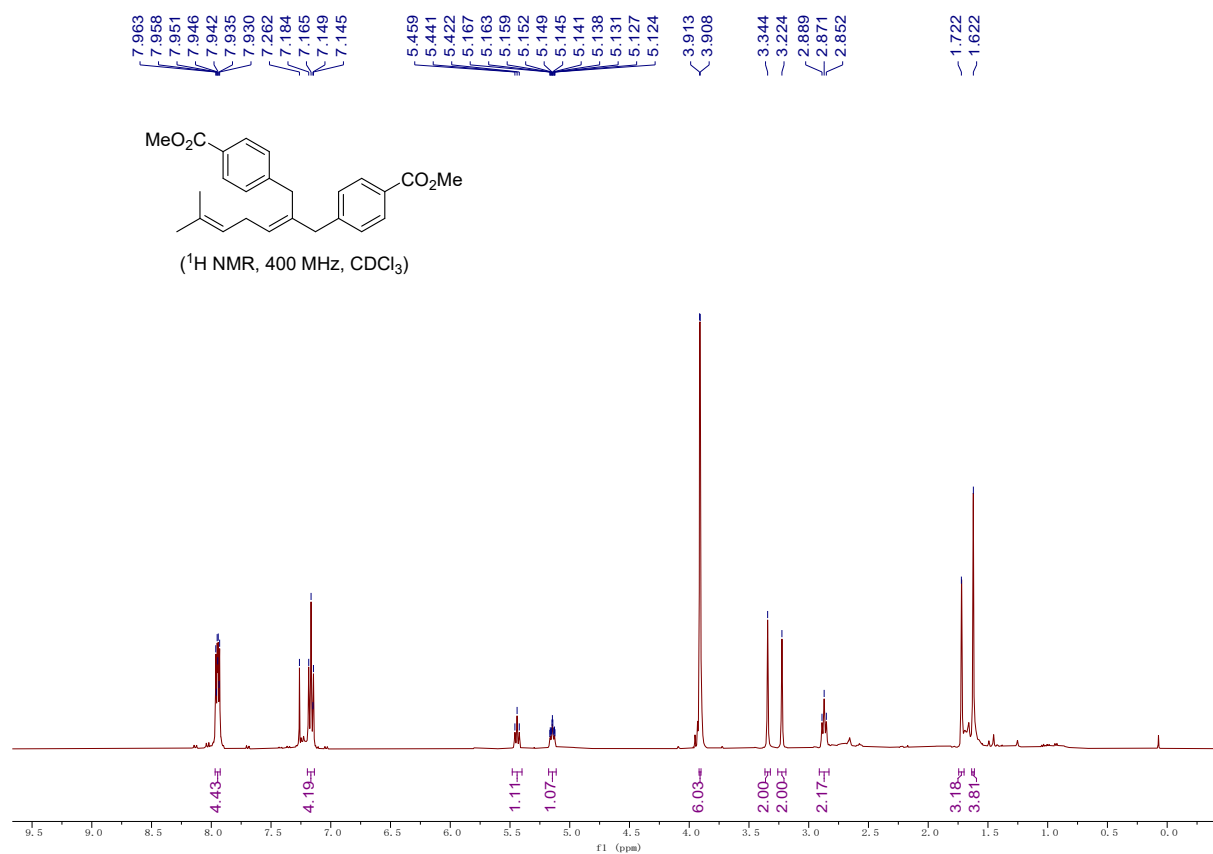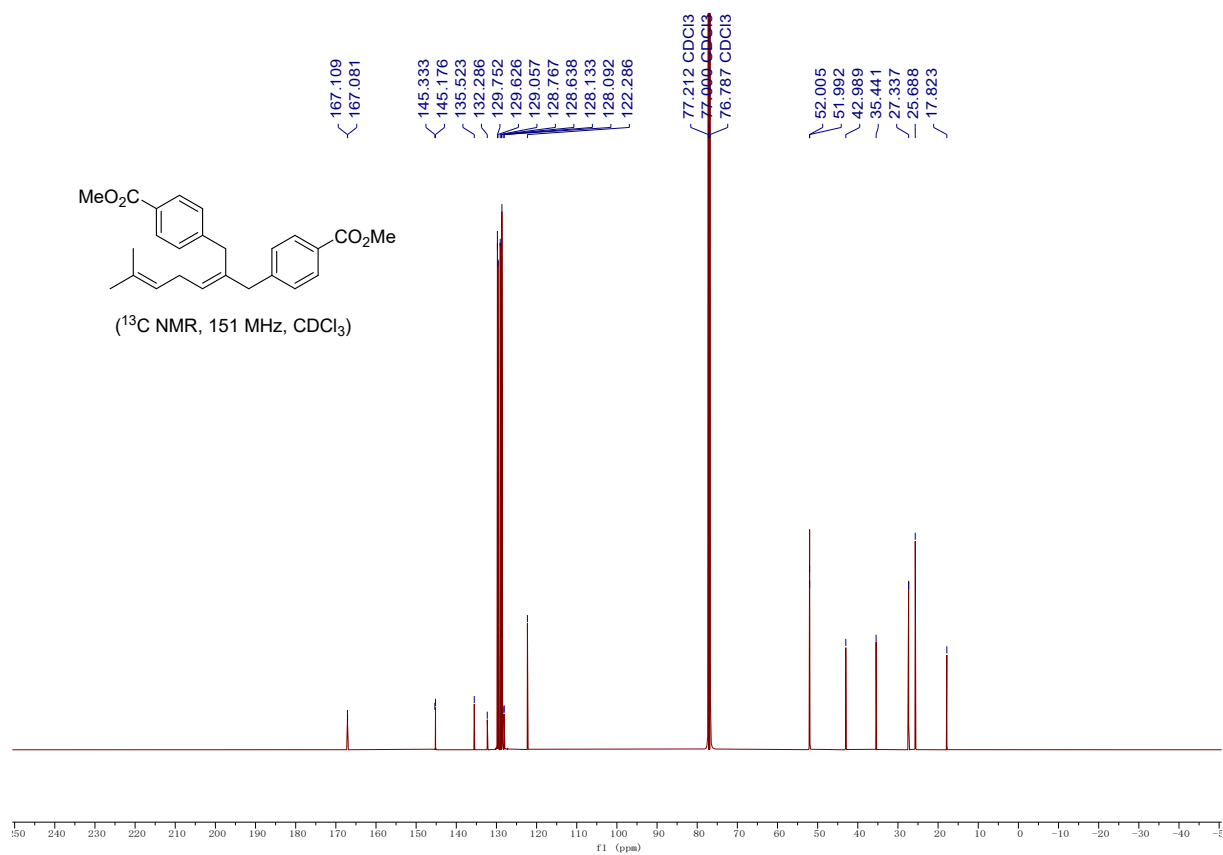

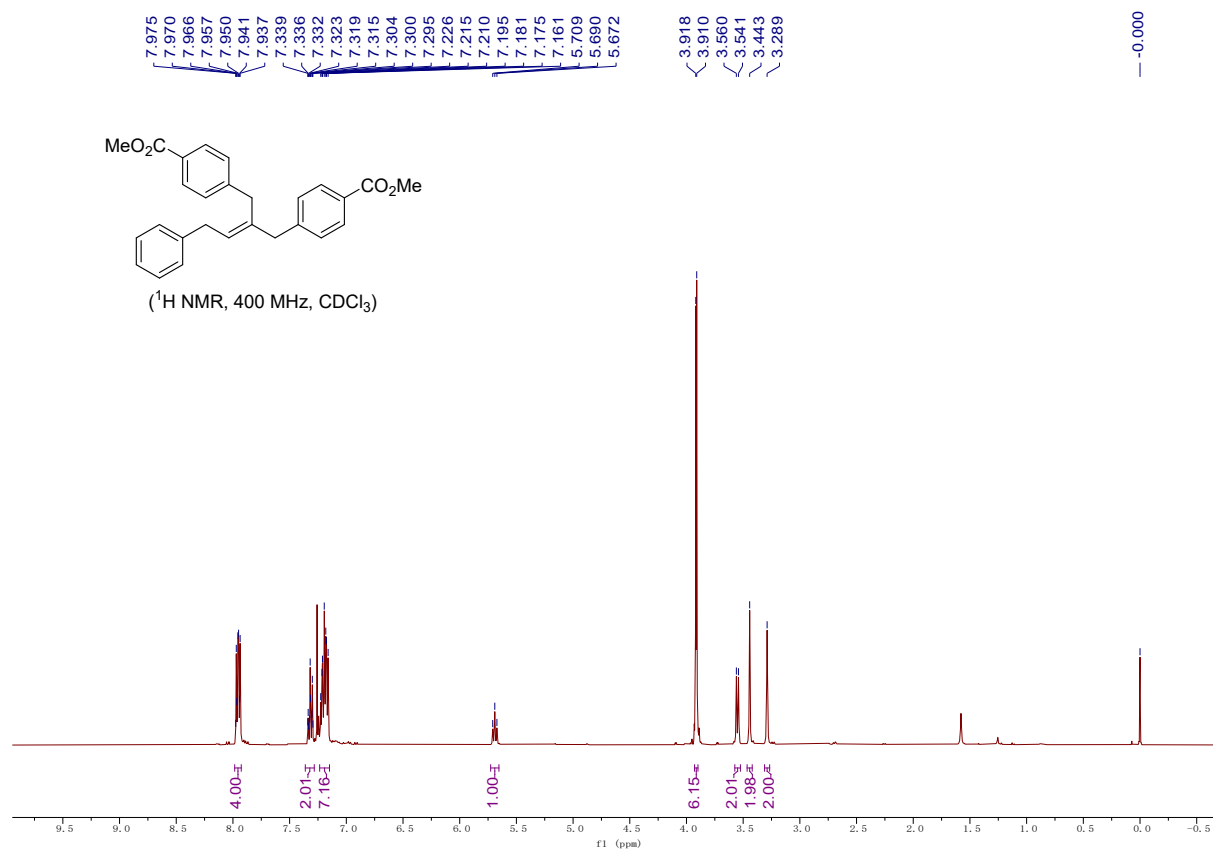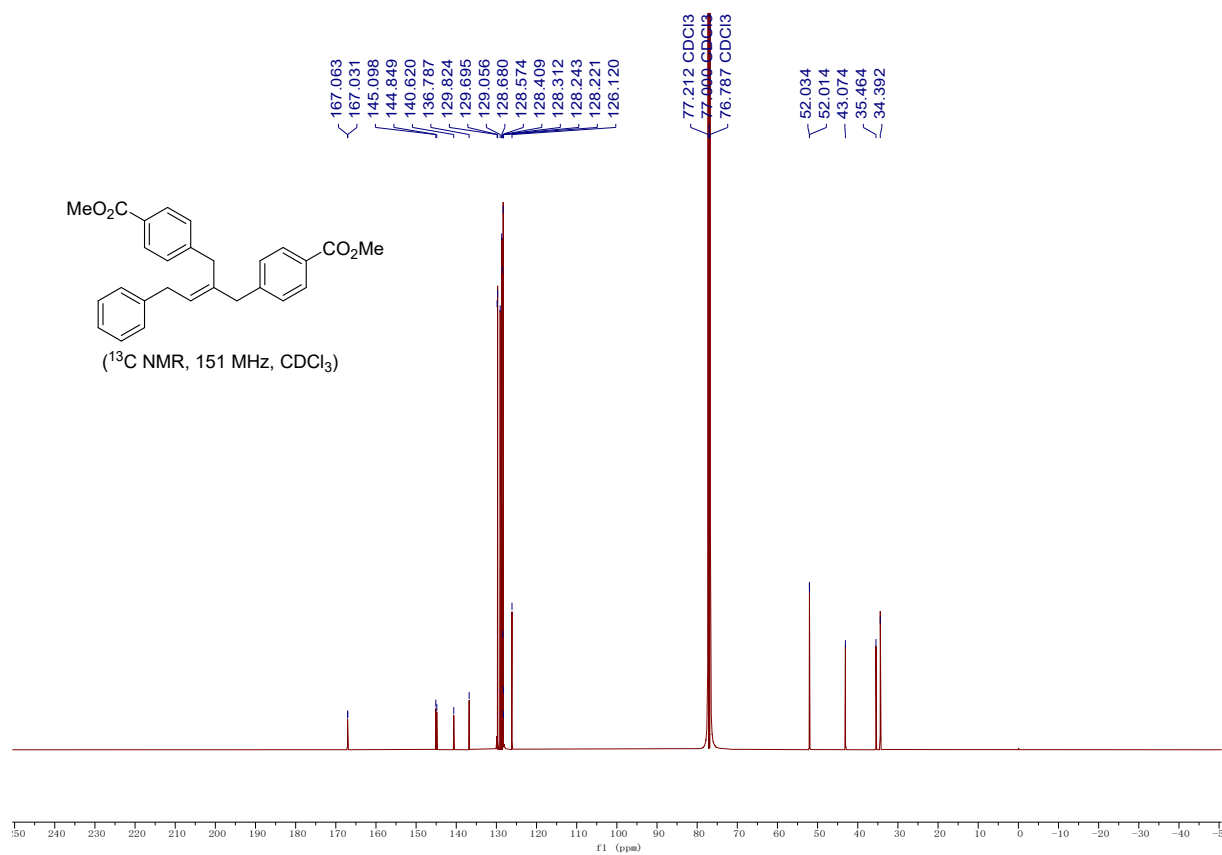

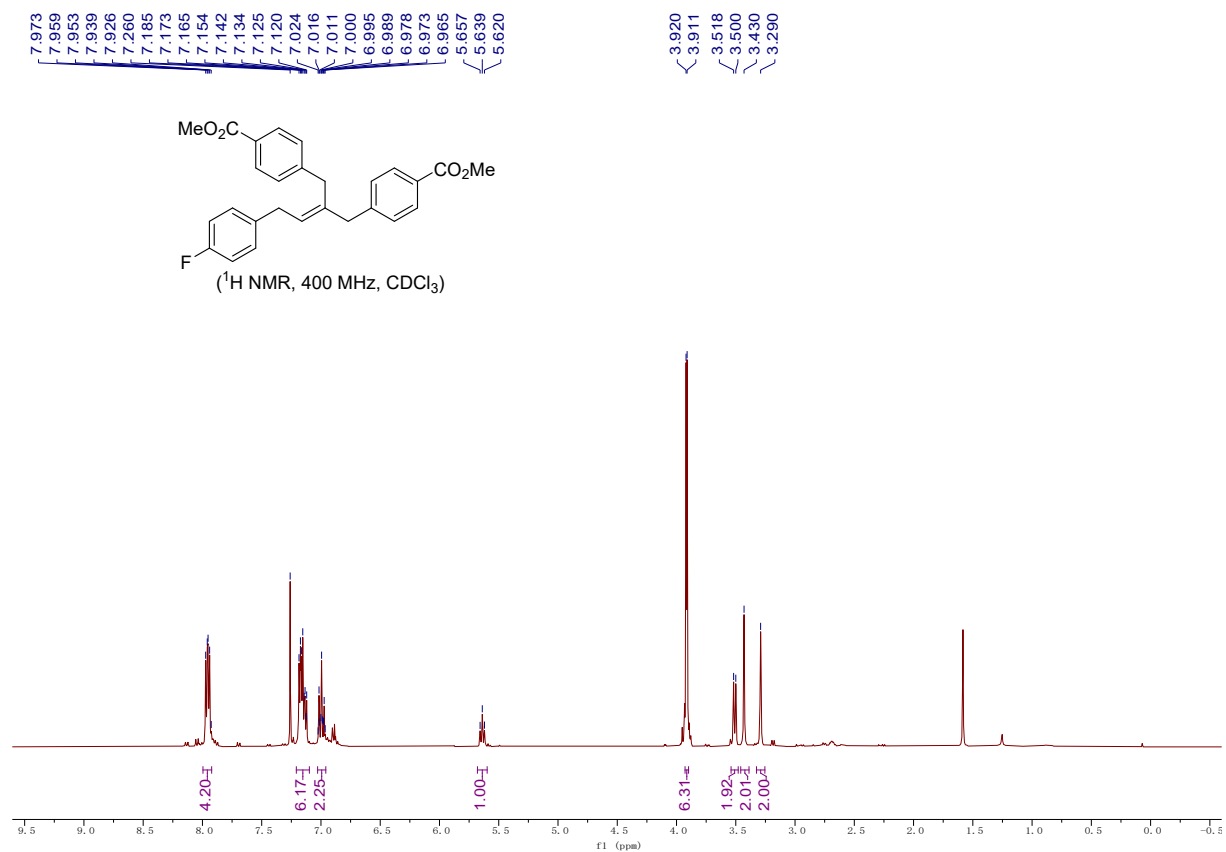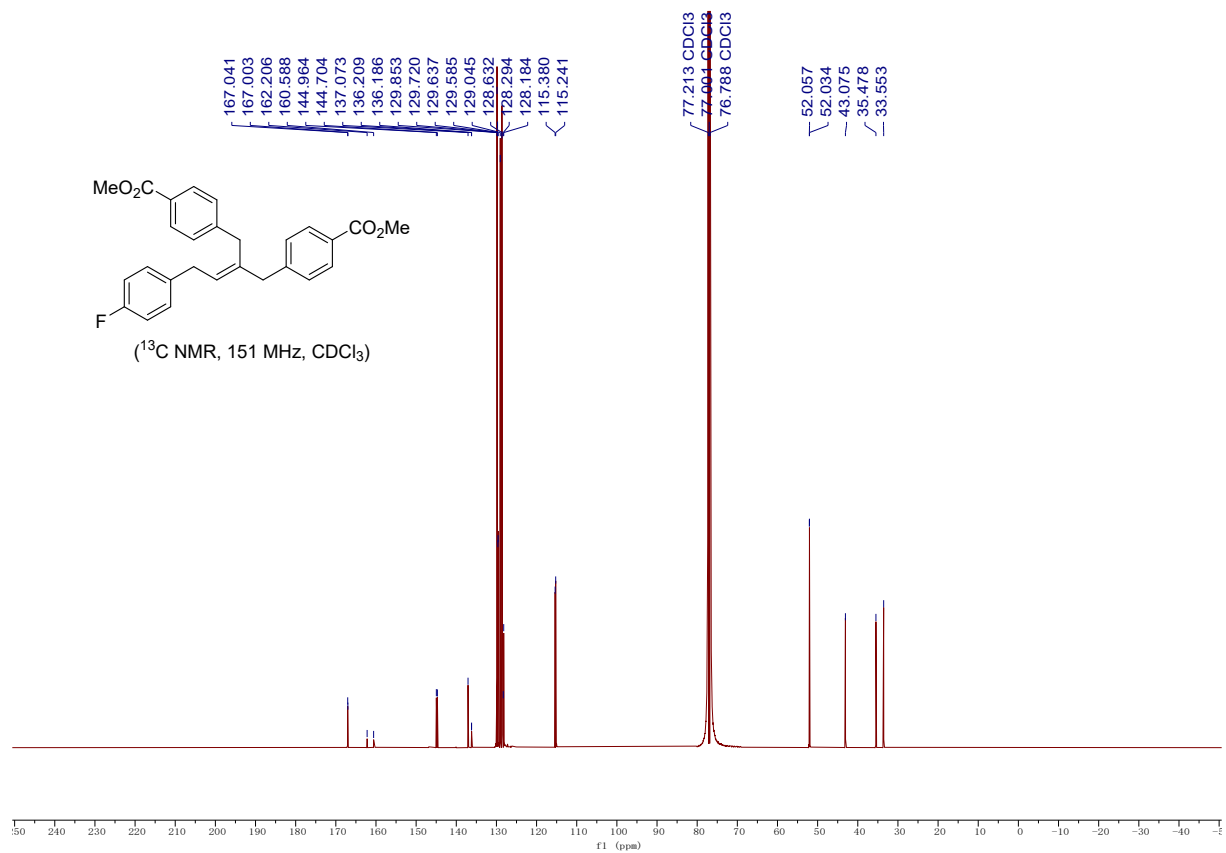

-117.206

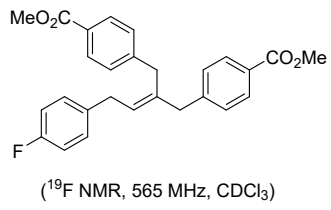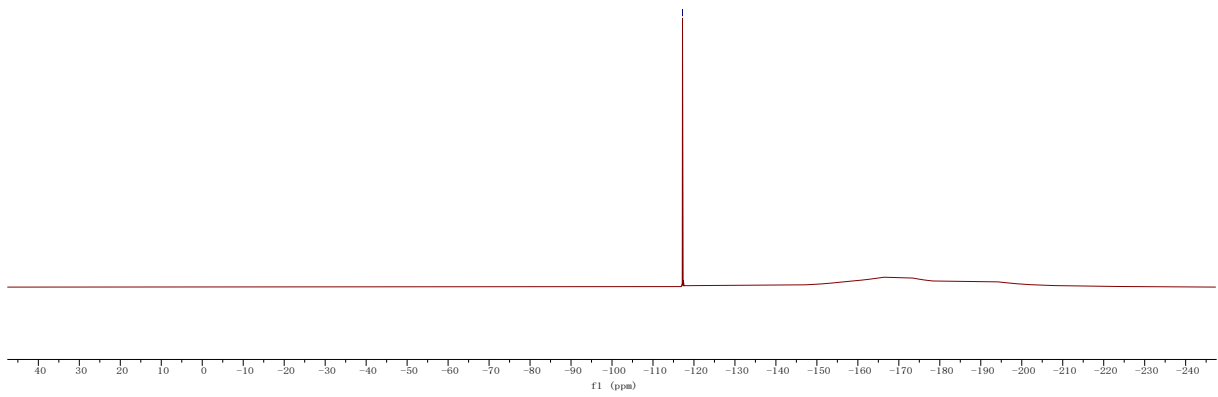

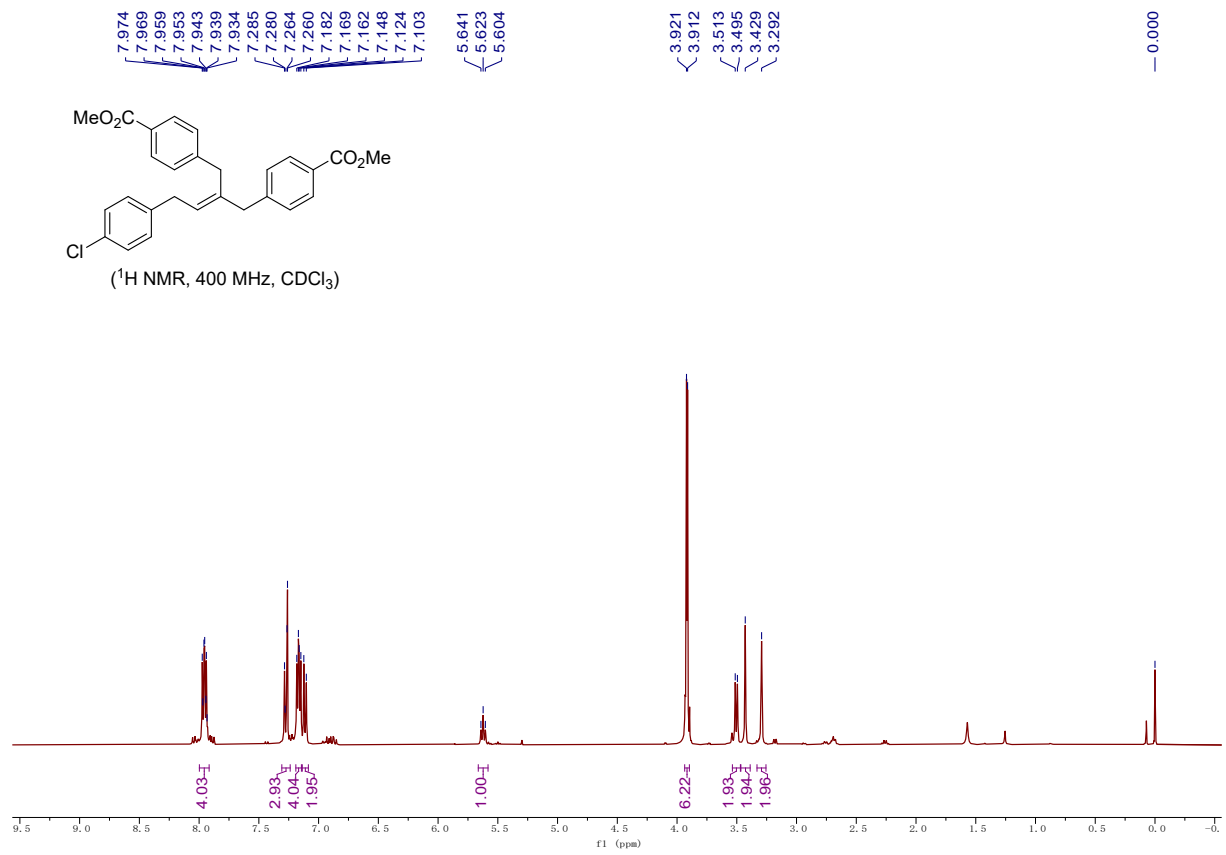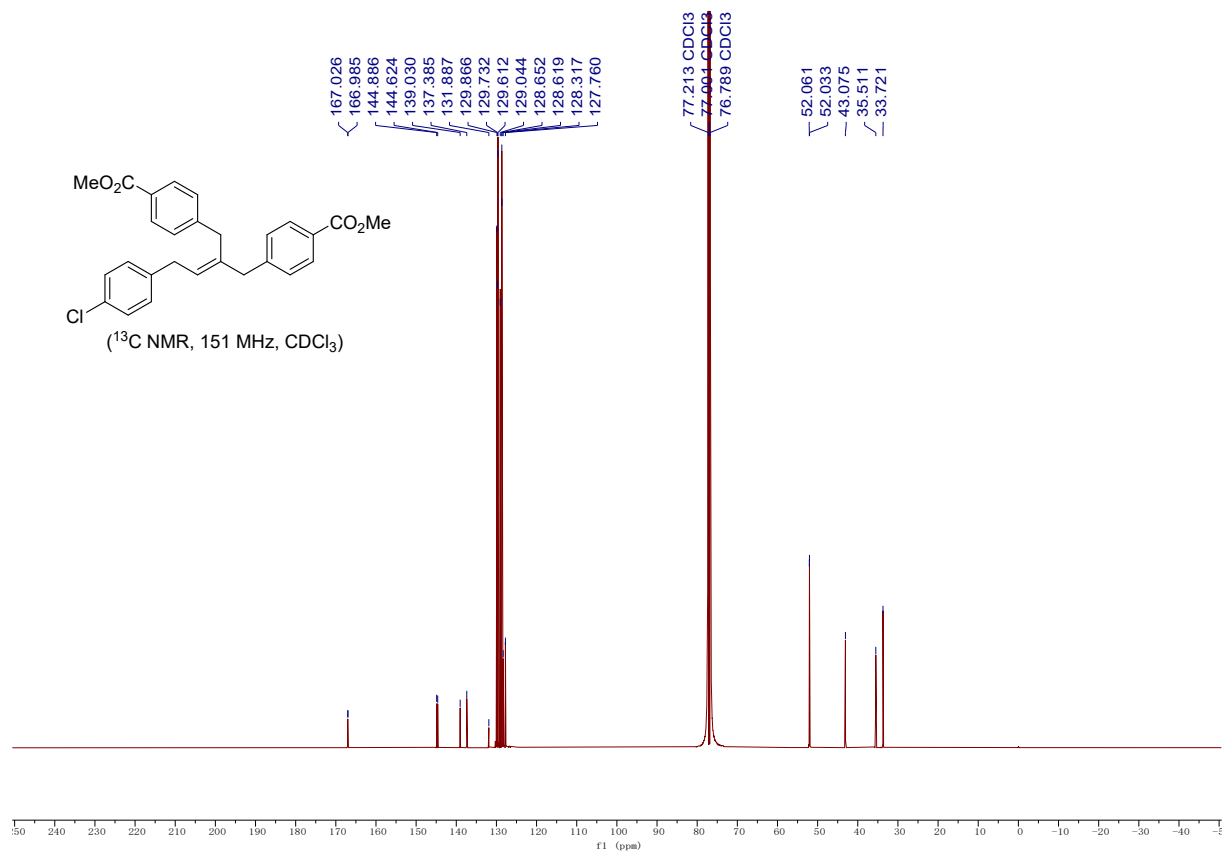

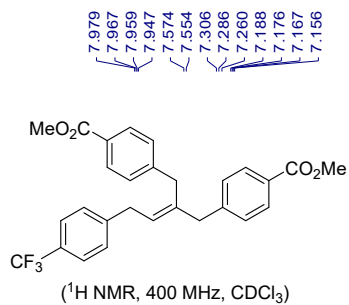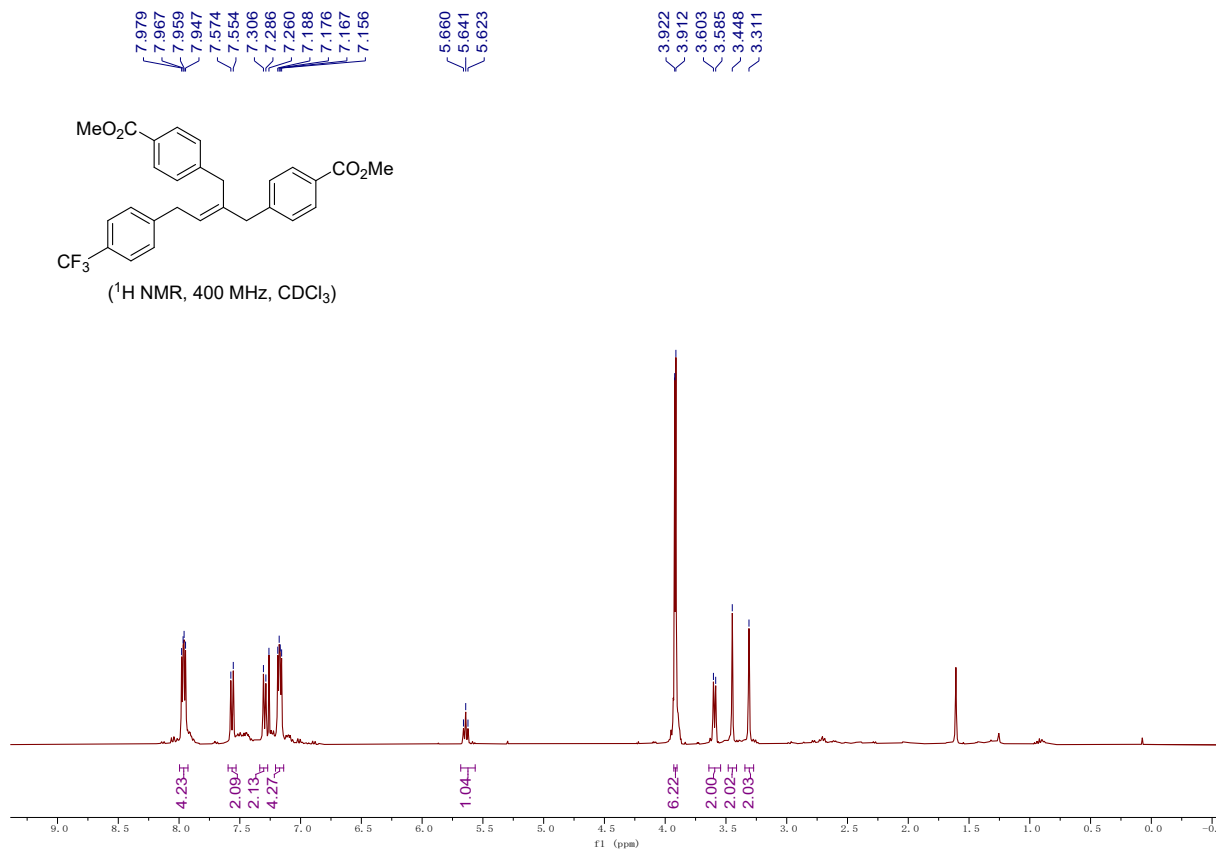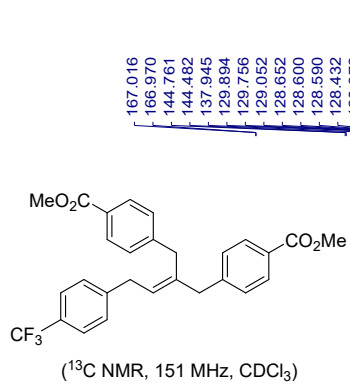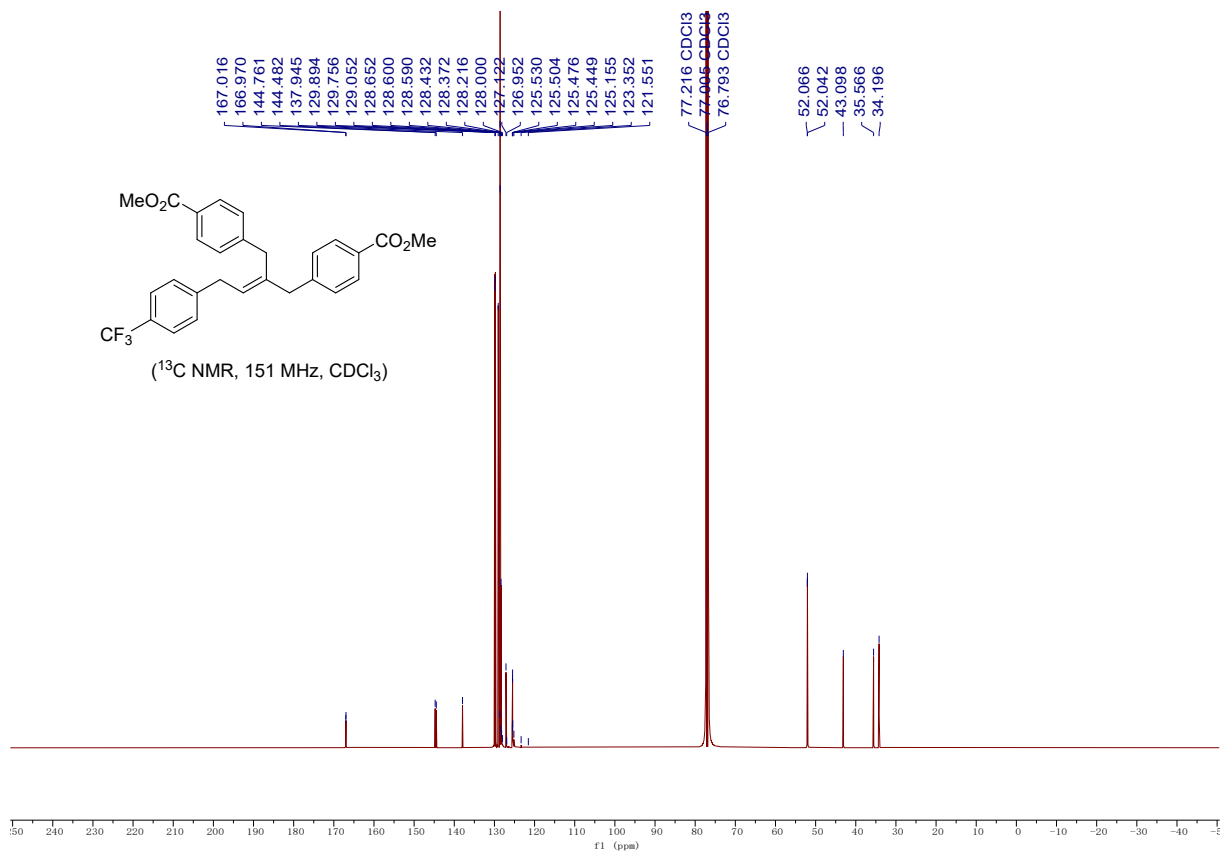

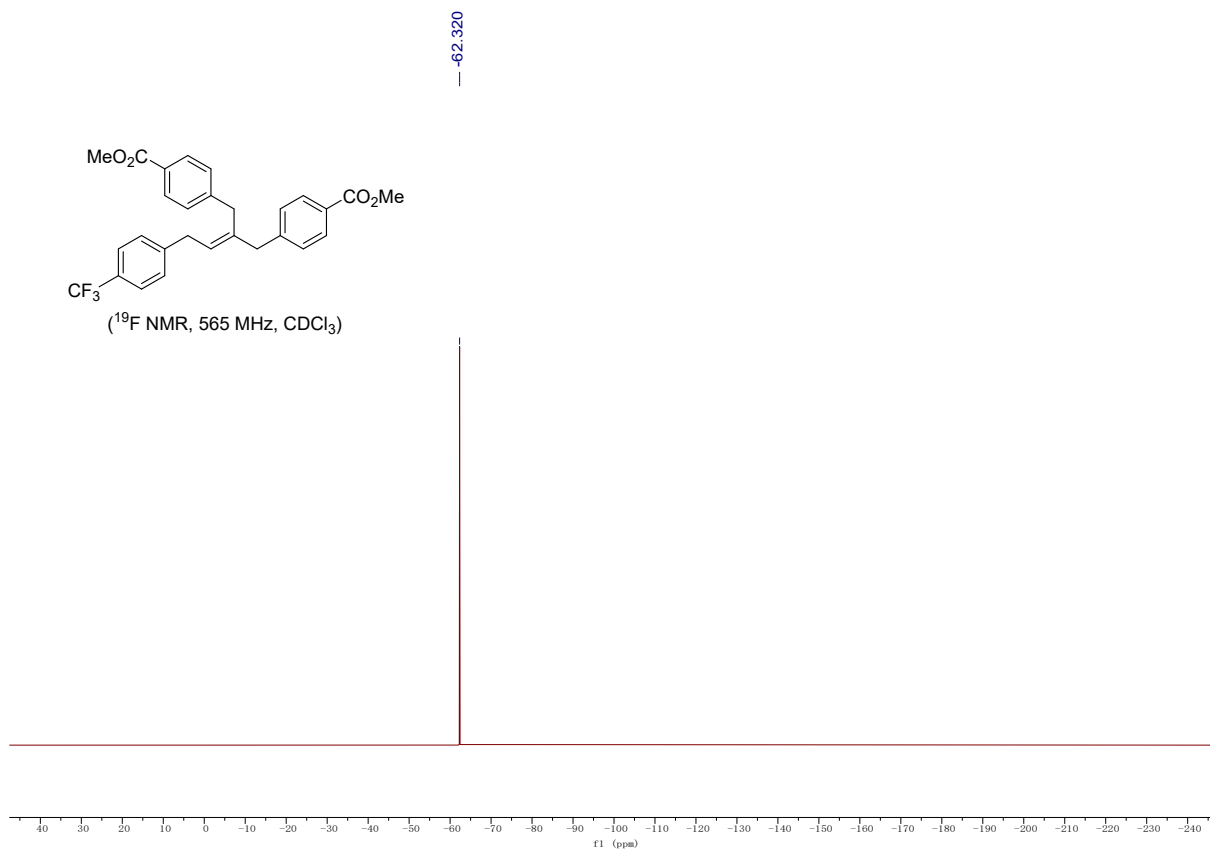



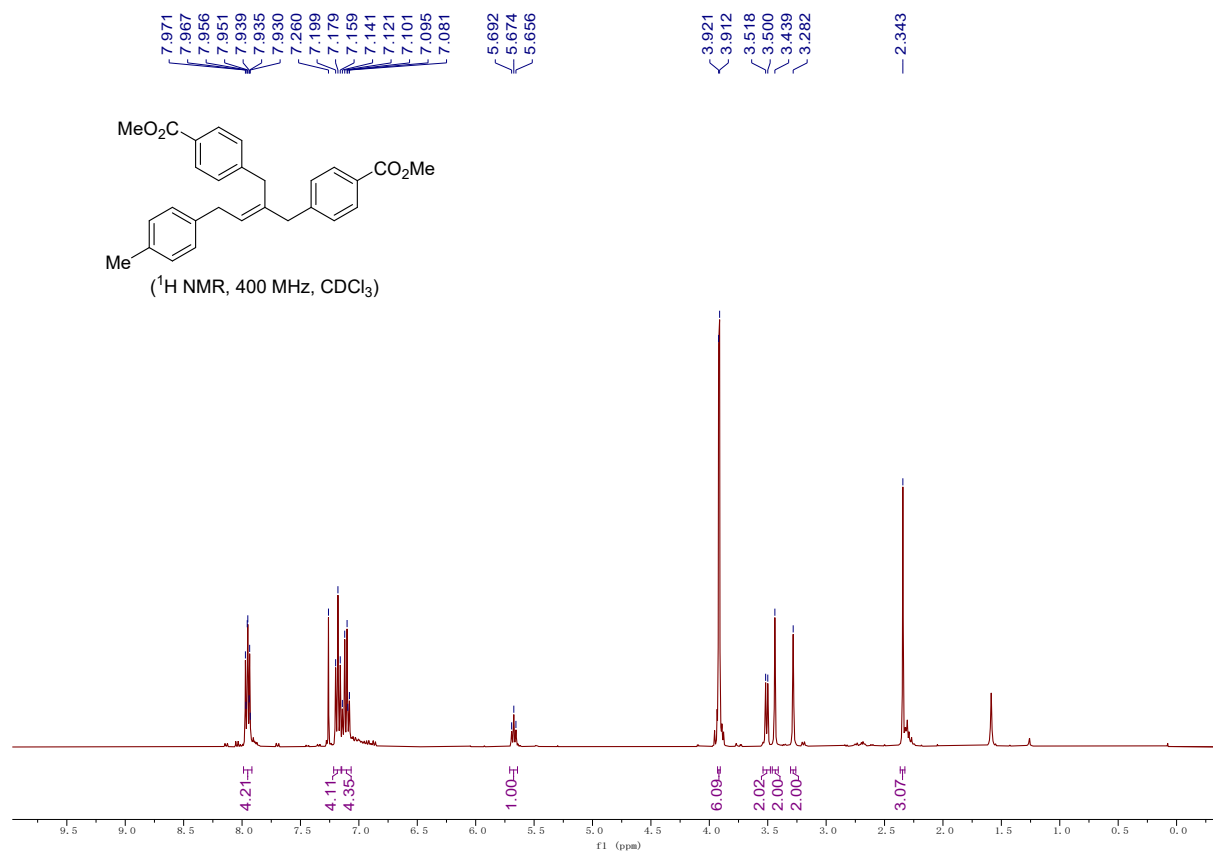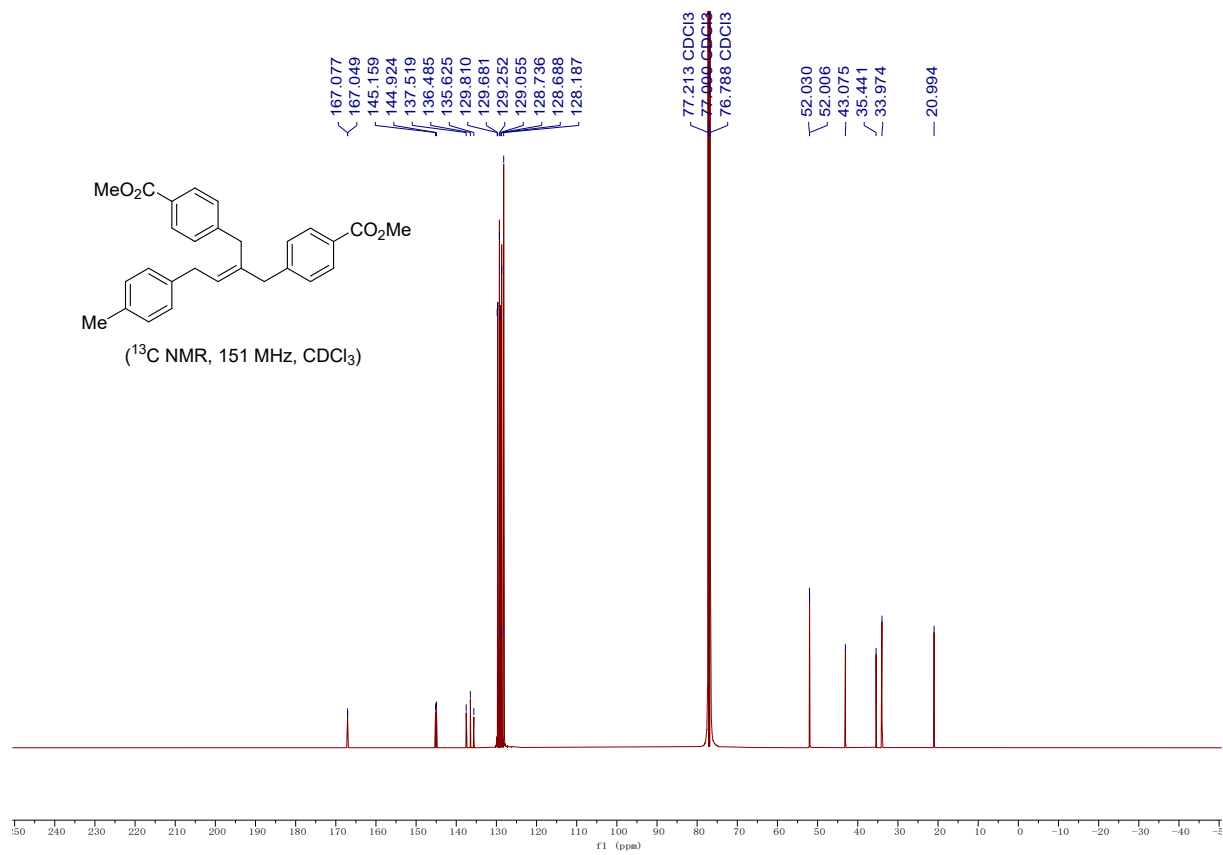

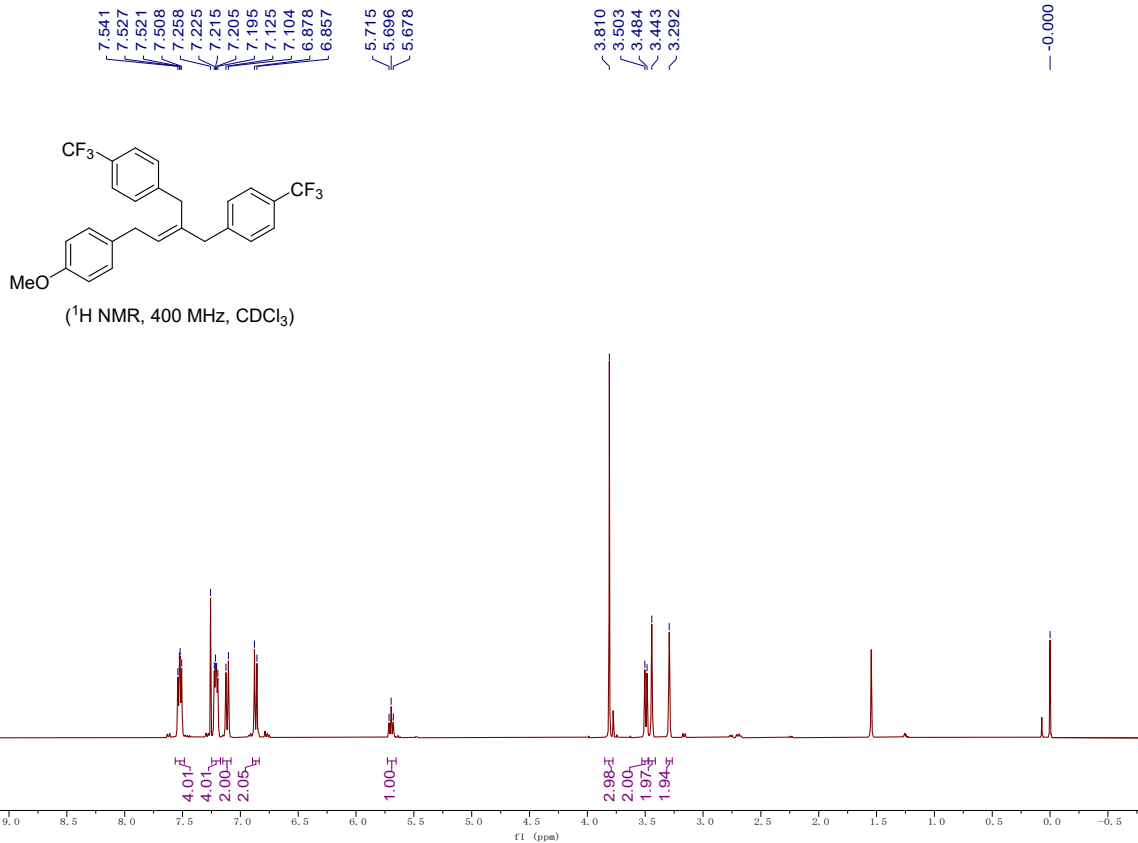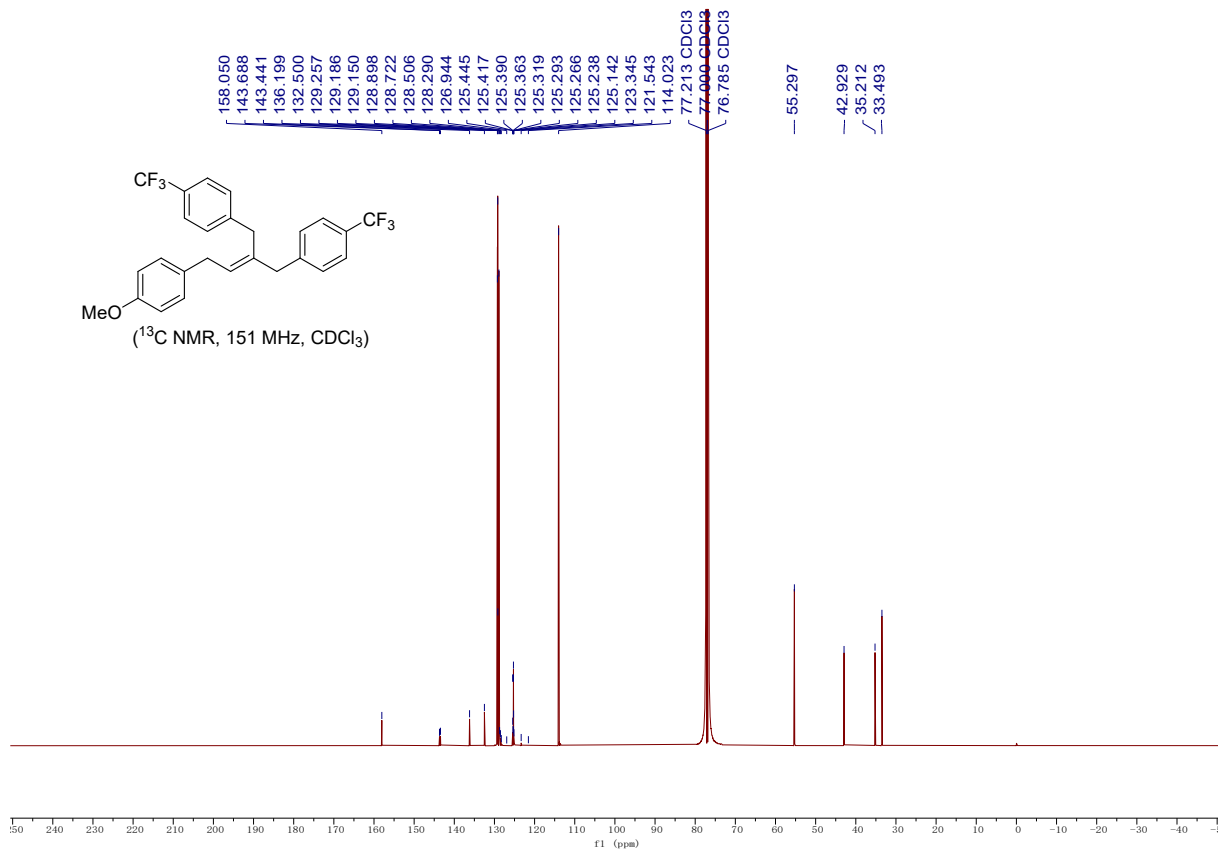

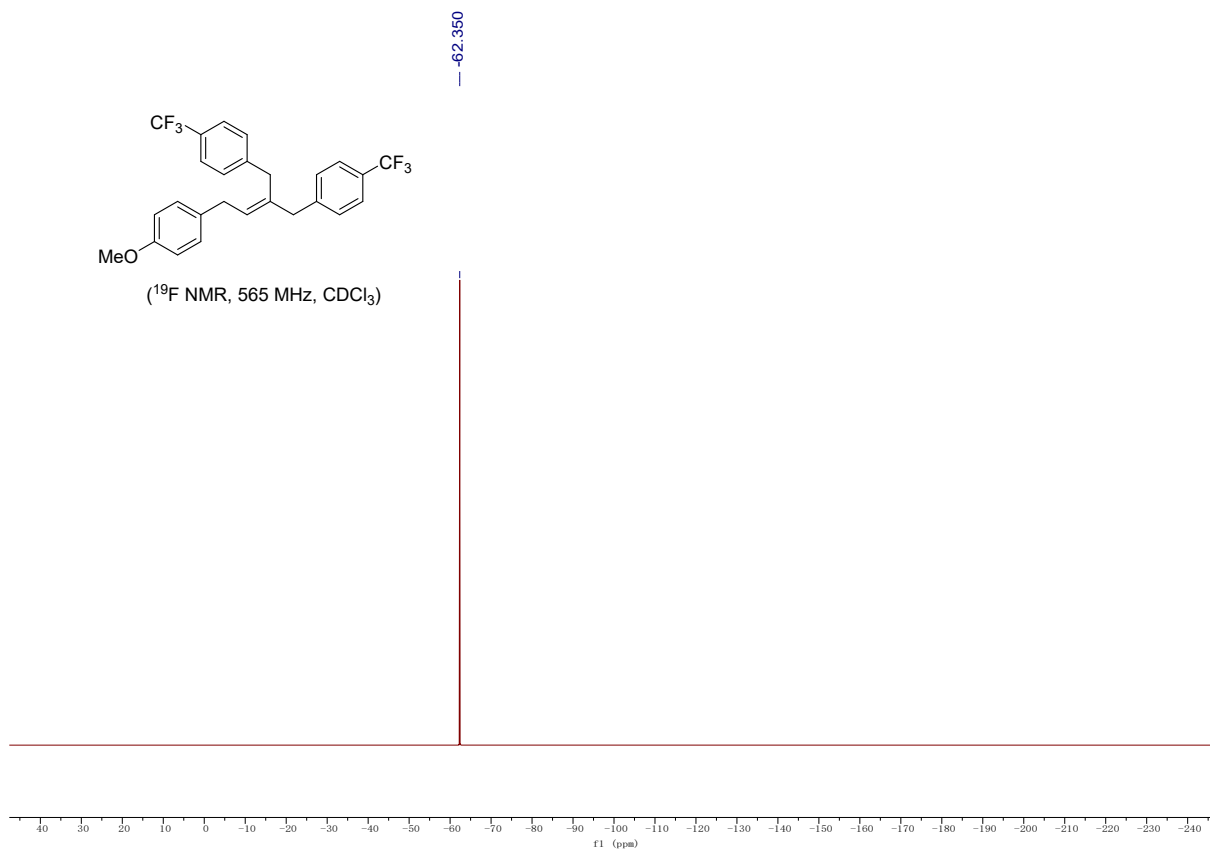

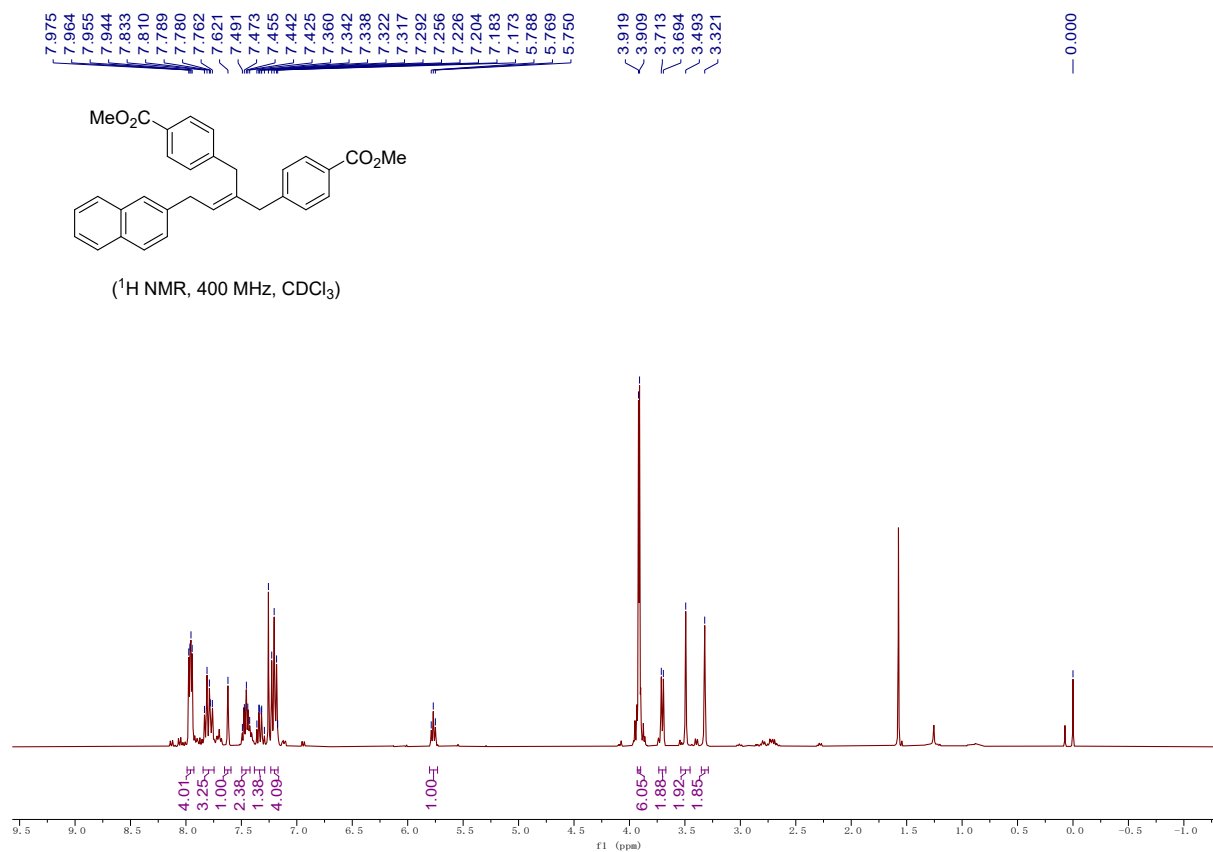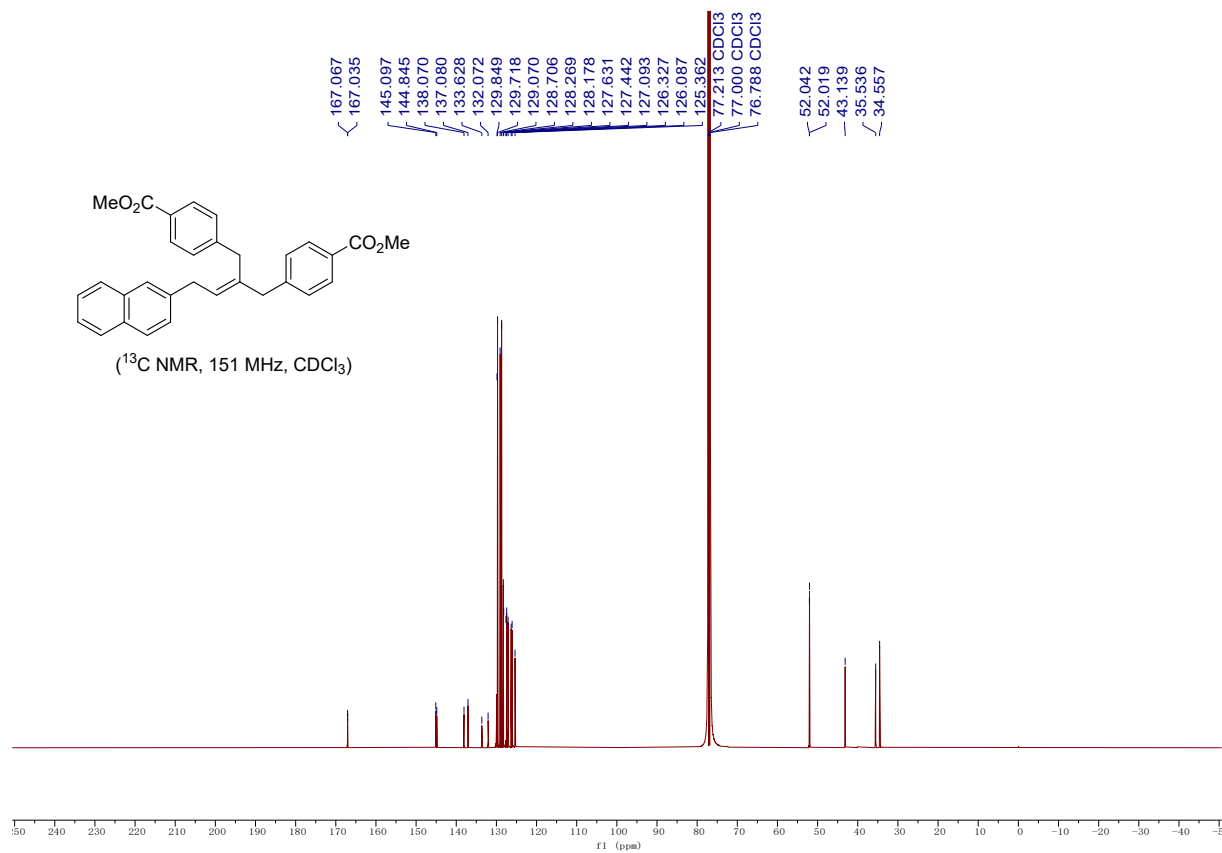

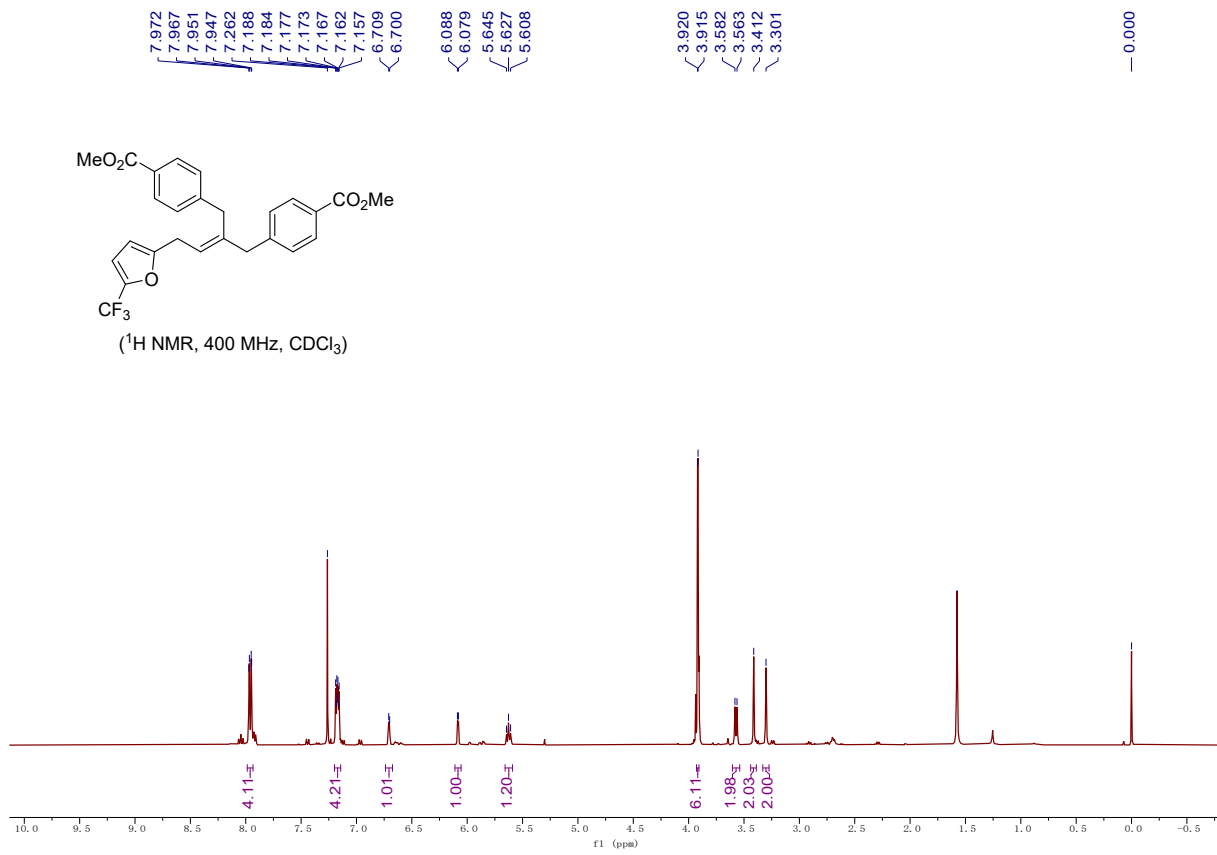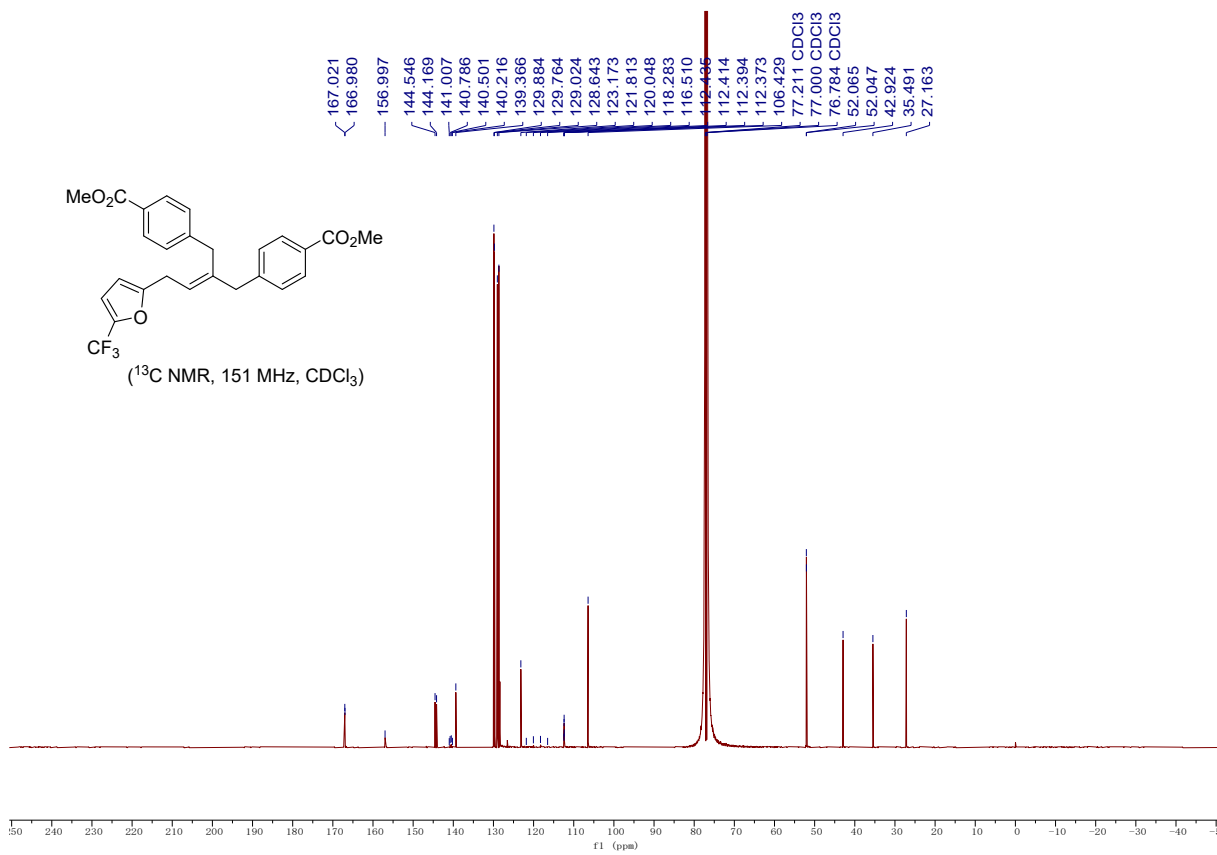

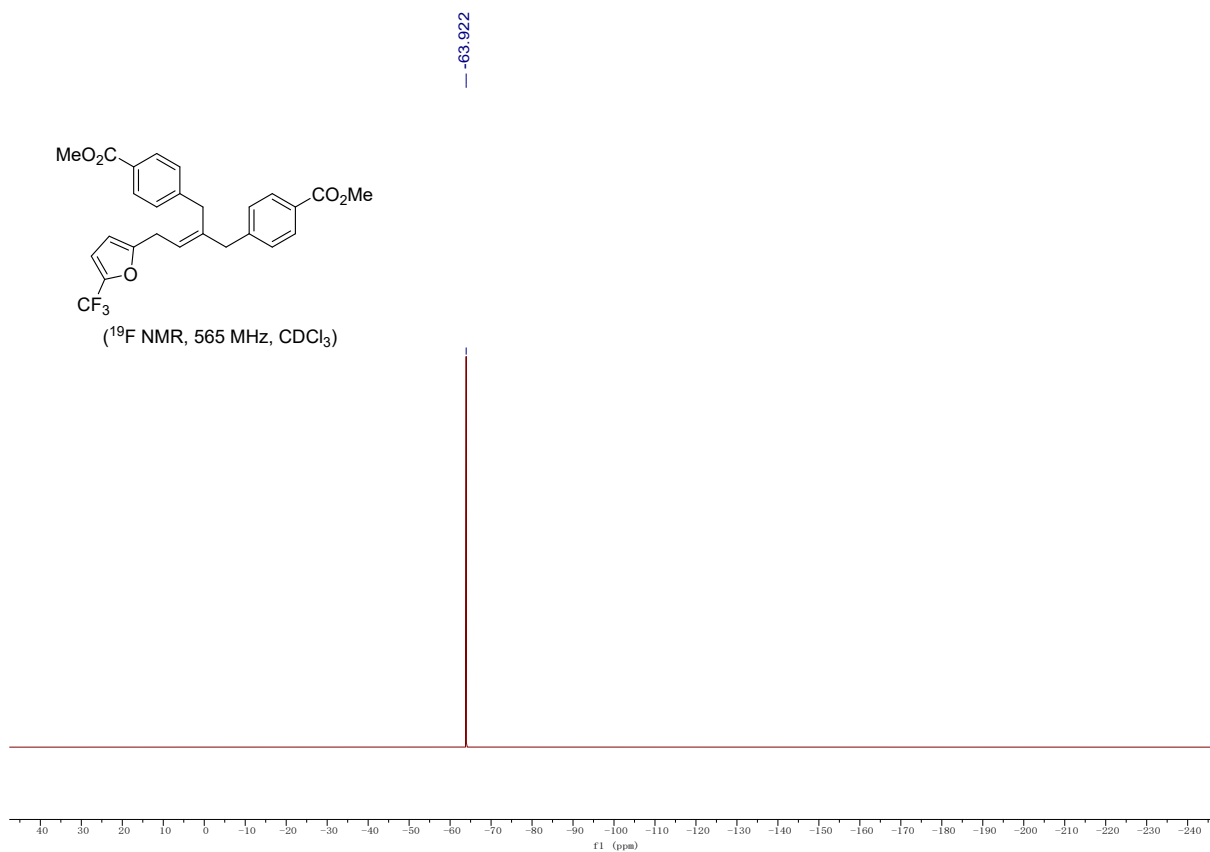

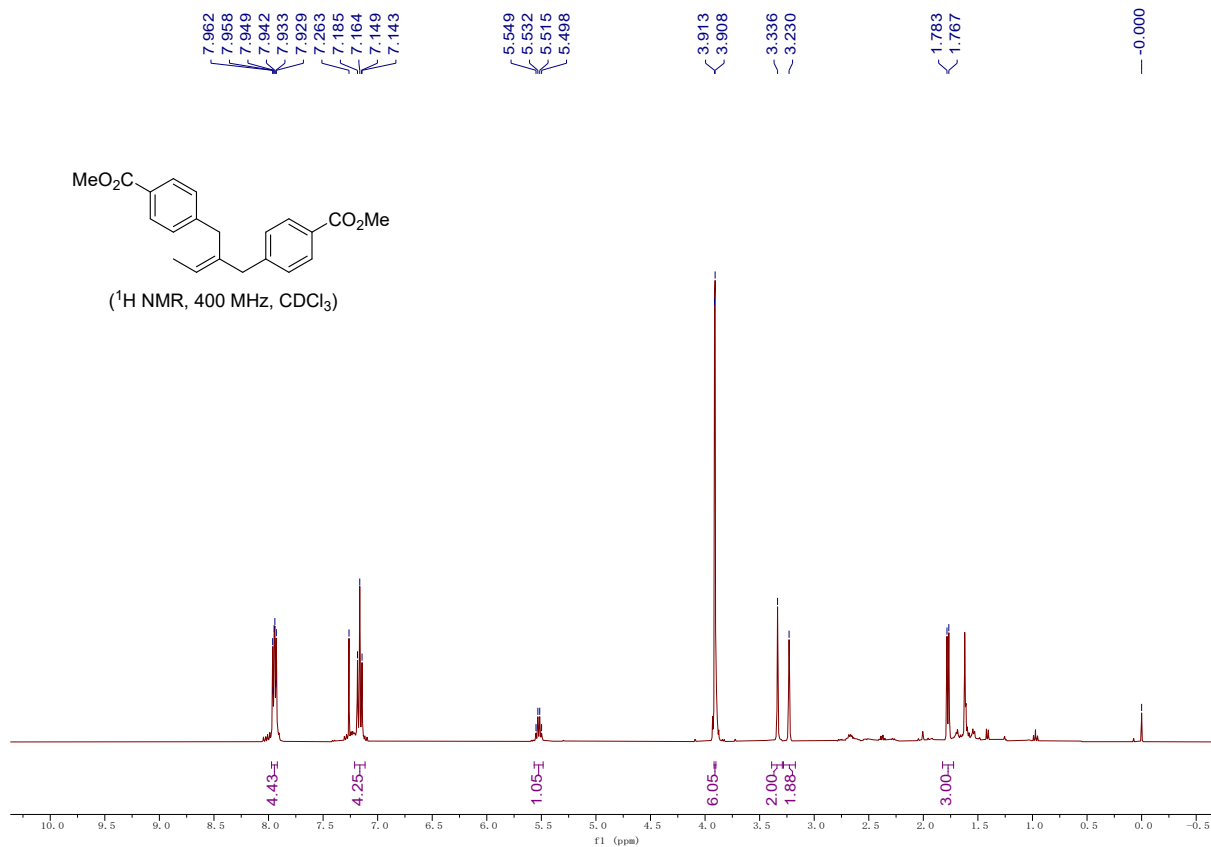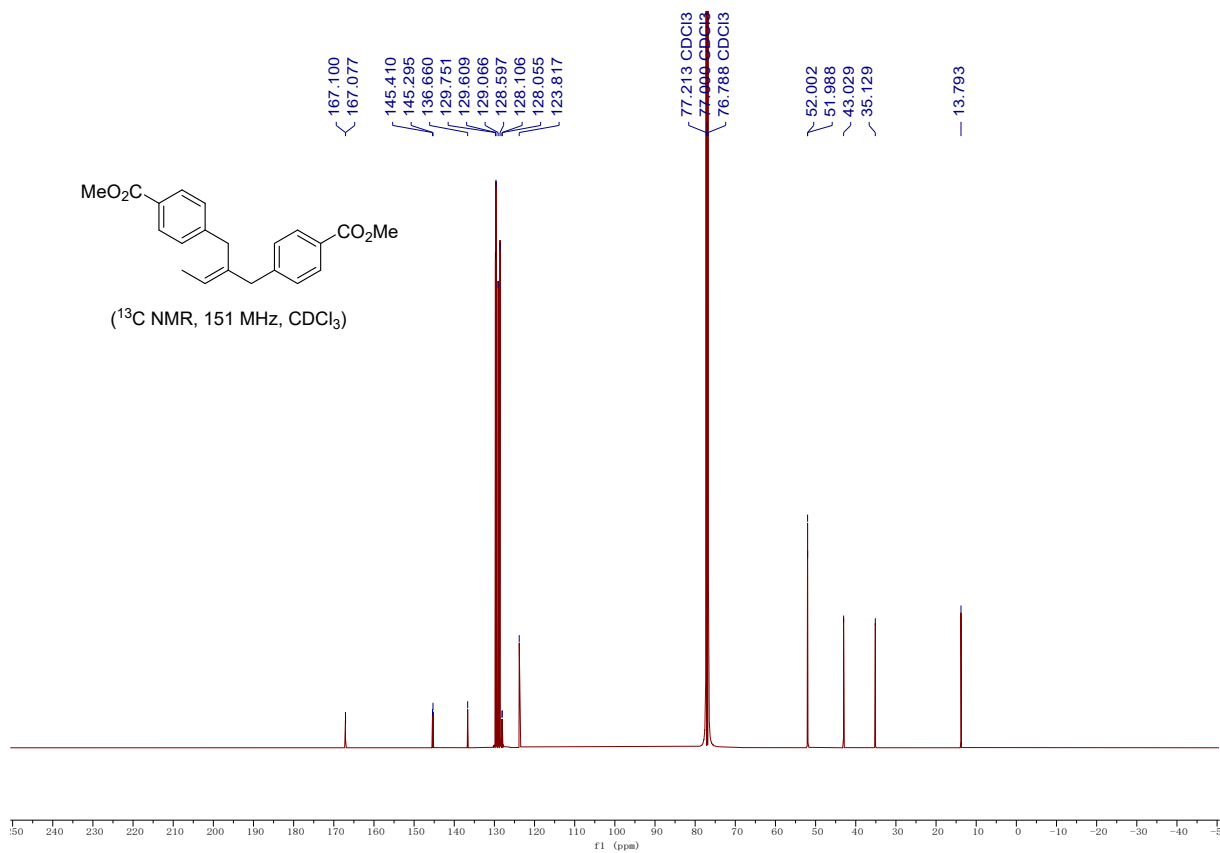





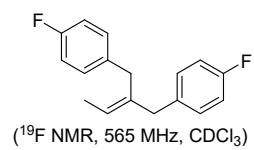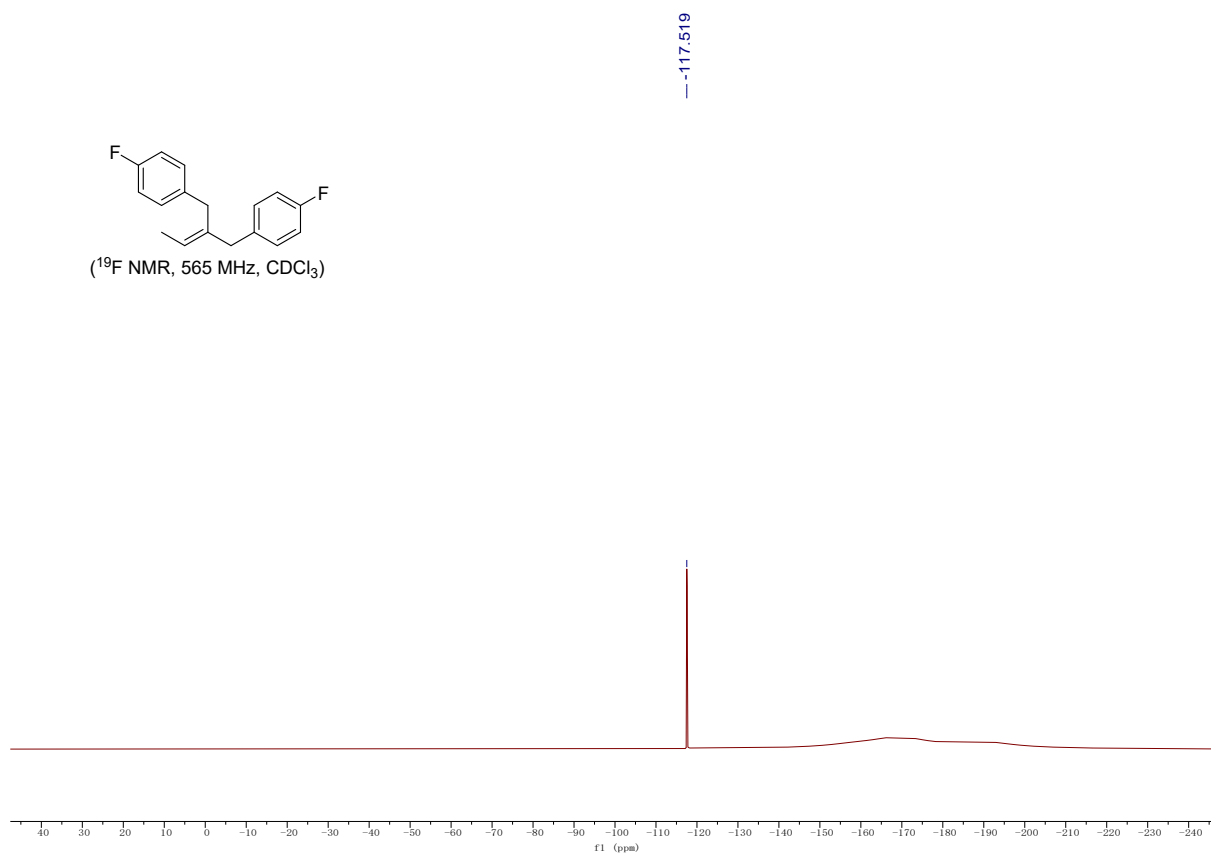

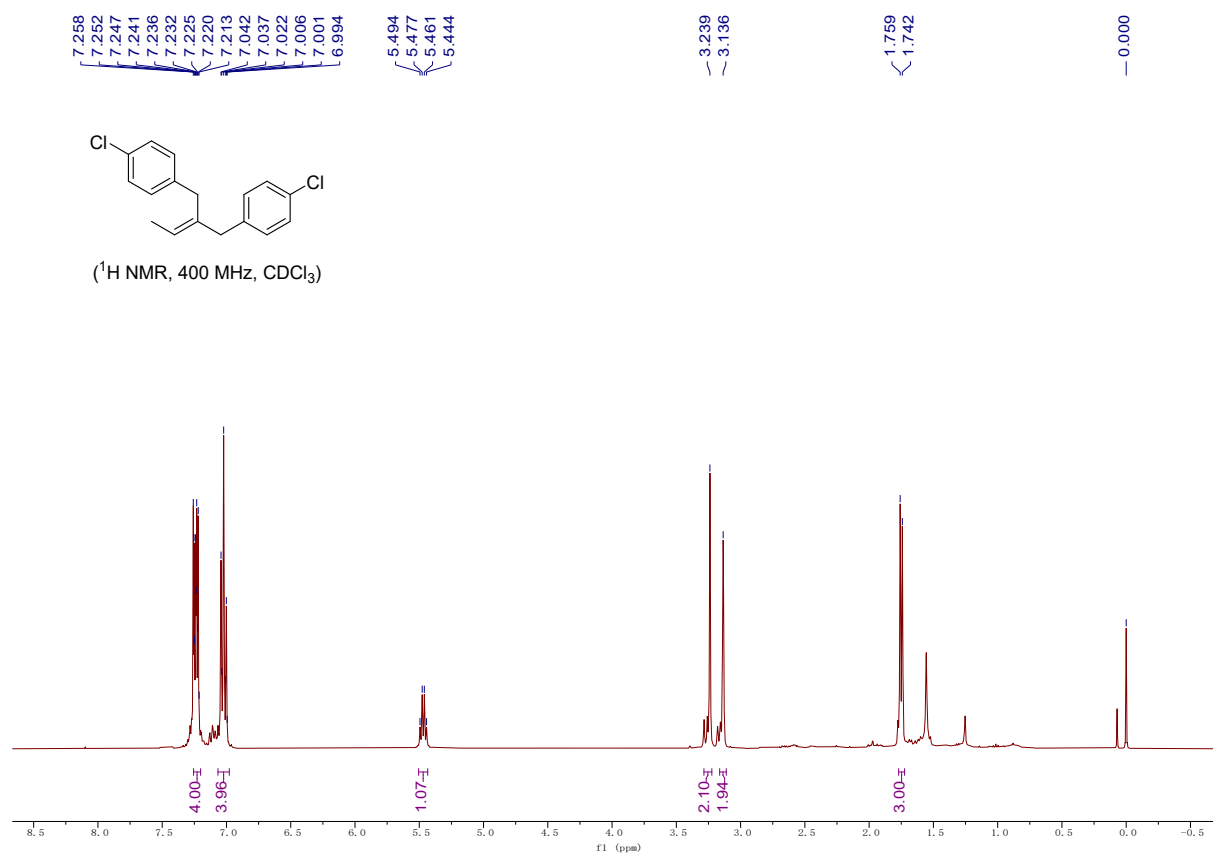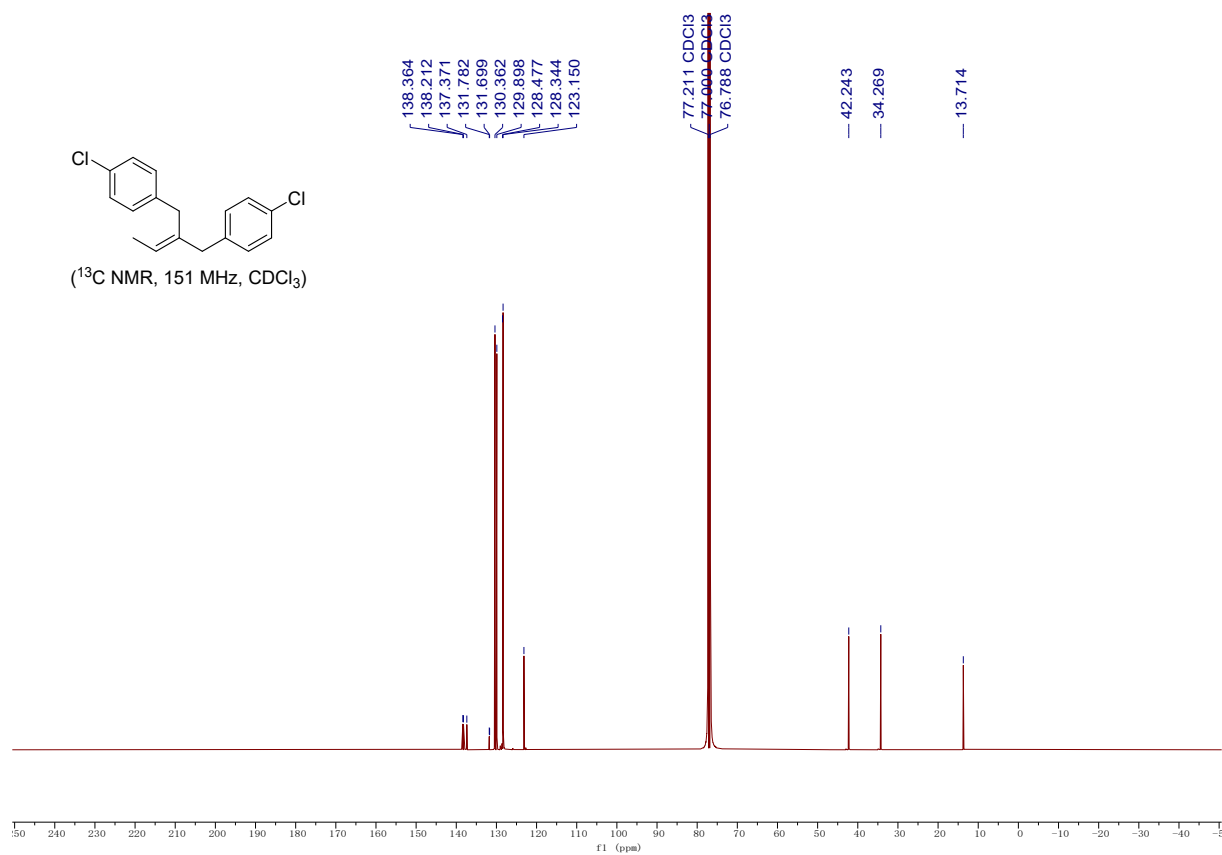

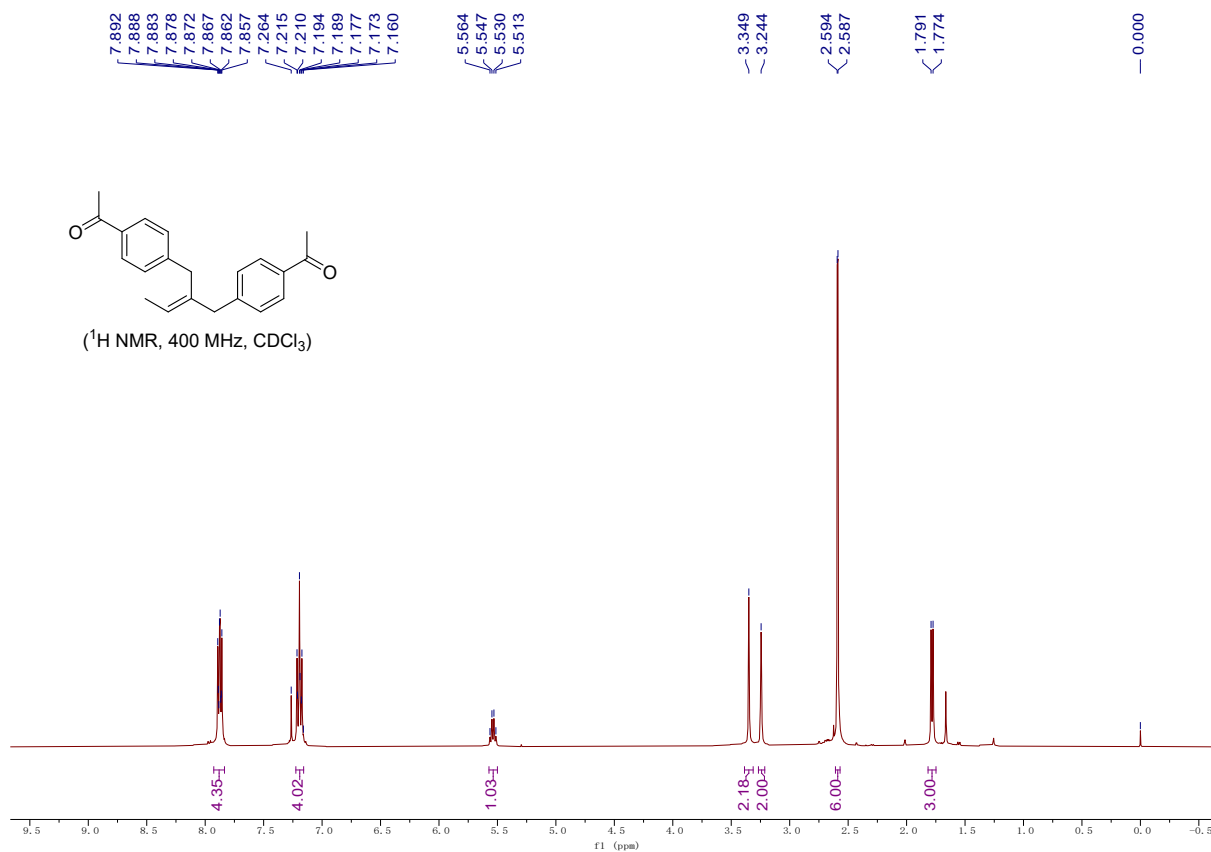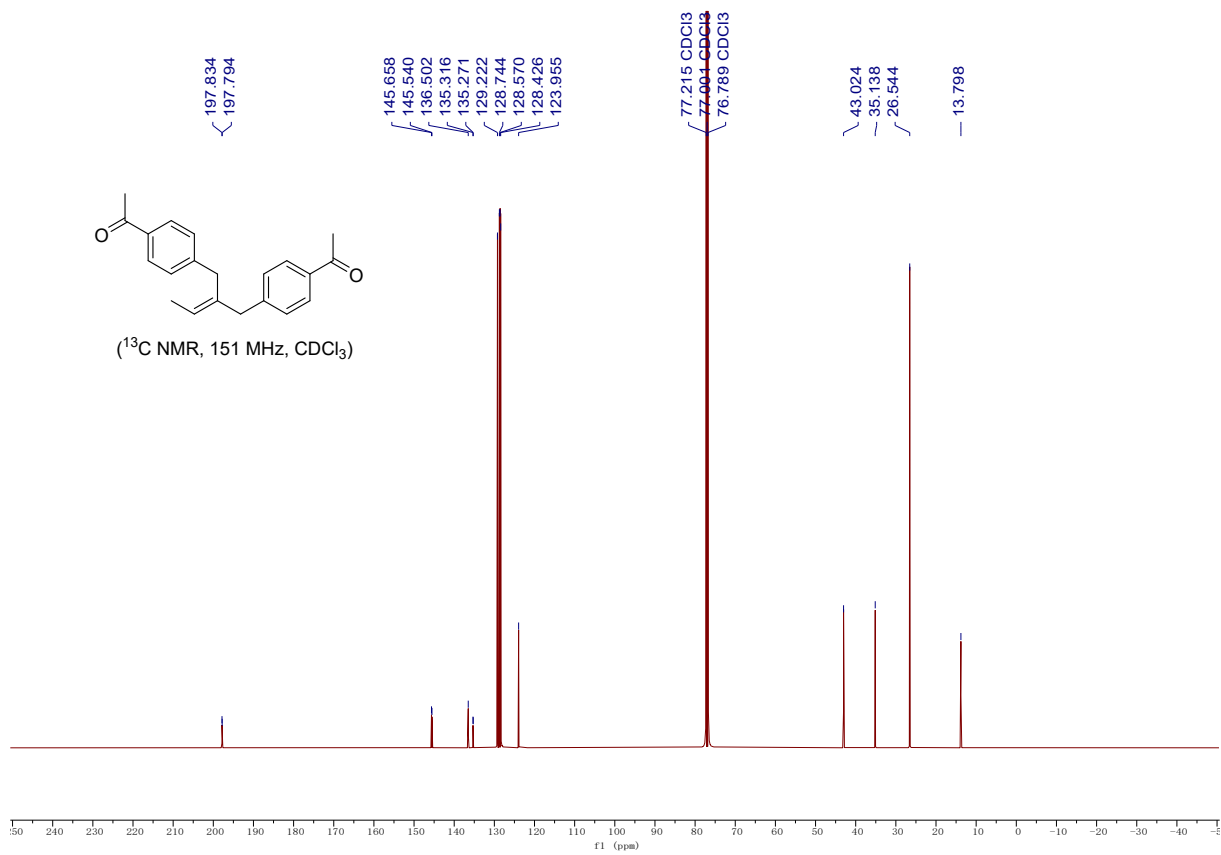

7.623  
7.618  
7.613  
7.599  
7.593  
7.551  
7.546  
7.538  
7.531  
7.523  
7.518  
7.512  
7.465  
7.459  
7.446  
7.441  
7.426  
7.421  
7.408  
7.366  
7.362  
7.358  
7.349  
7.344  
7.339  
7.329  
7.325  
7.321  
7.260  
7.245  
7.239  
7.222  
7.218  
5.590  
5.573  
5.556  
5.539  
3.403  
3.305  
1.837  
1.821

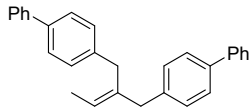

(<sup>1</sup>H NMR, 400 MHz, CDCl<sub>3</sub>)

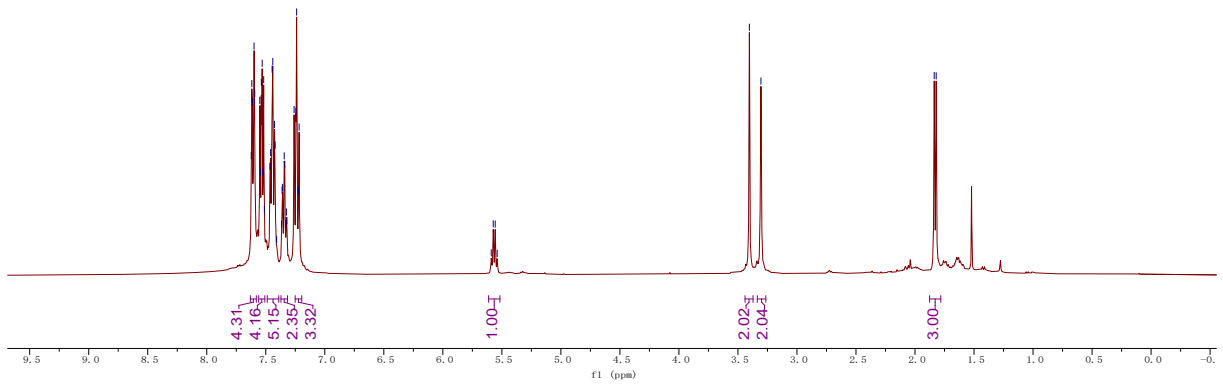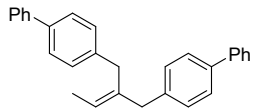

(<sup>13</sup>C NMR, 151 MHz, CDCl<sub>3</sub>)

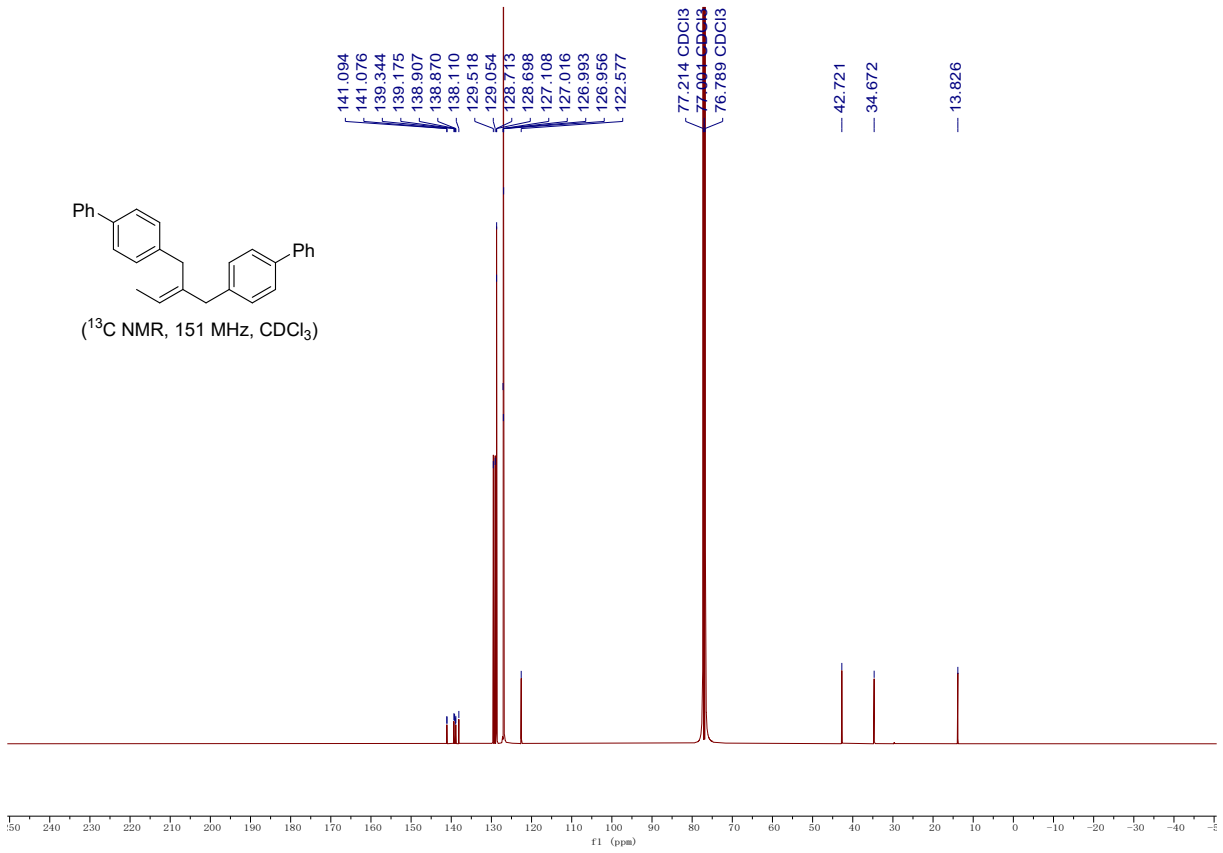

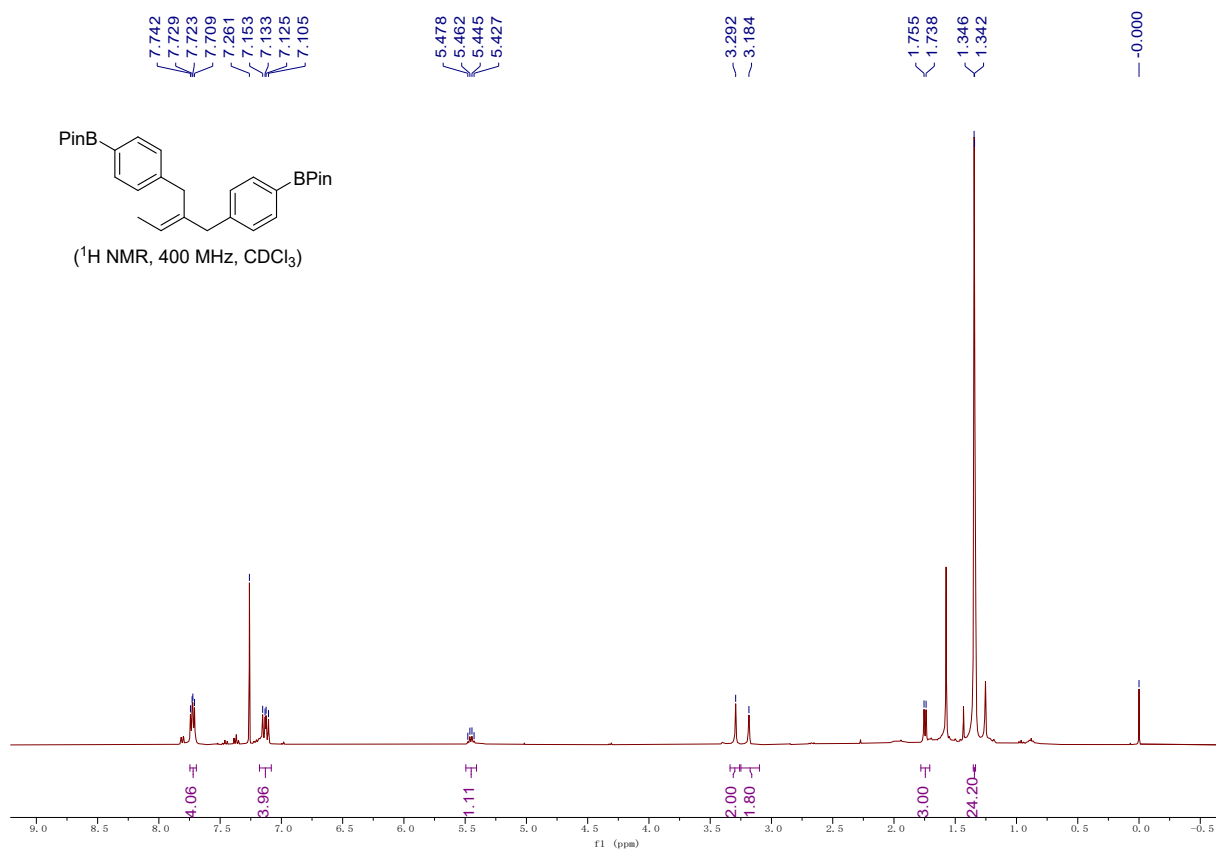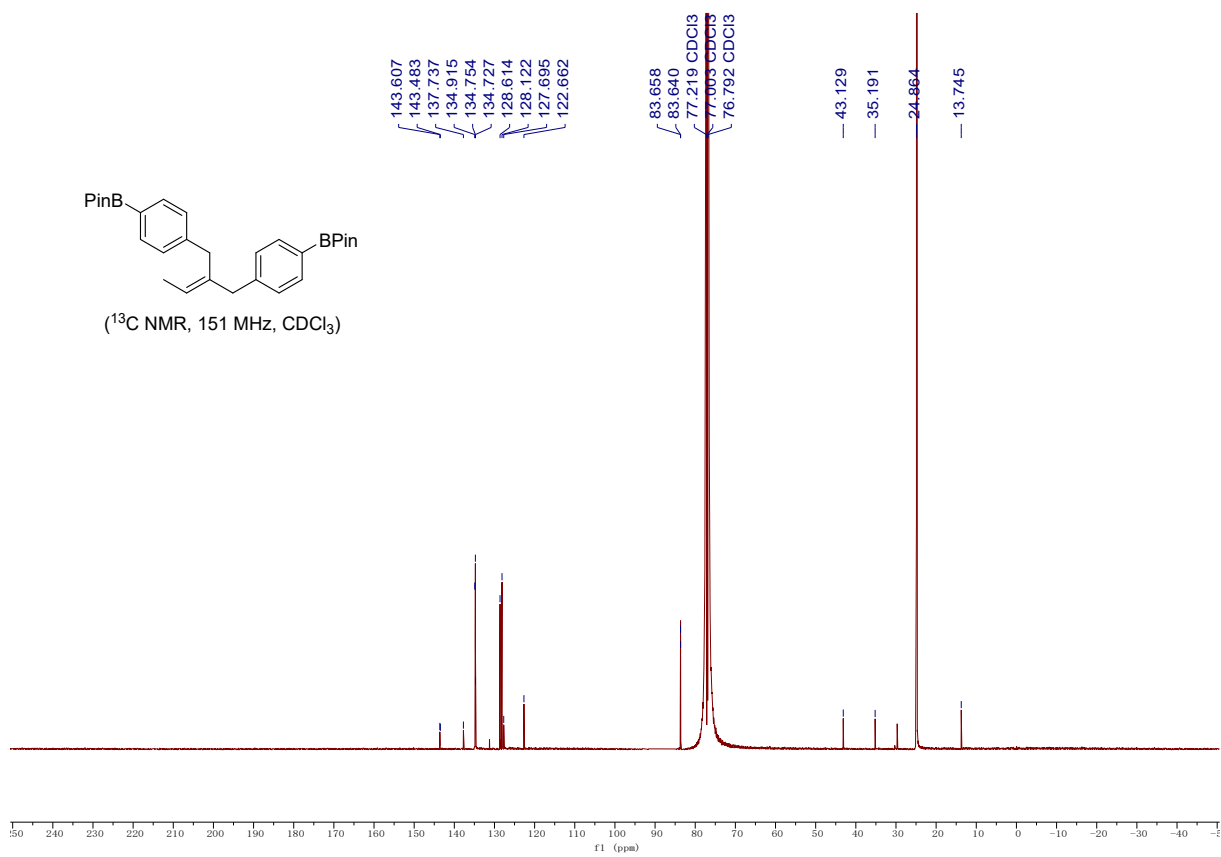

7.258  
7.219  
7.207  
7.199  
7.187  
7.179  
7.167  
6.758  
6.752  
6.738  
6.732  
6.726  
6.719  
6.715  
6.699  
6.684  
6.689  
6.681  
6.676  
6.671  
5.511  
5.494  
5.477  
5.460

3.789  
3.784

3.285  
3.186

1.765  
1.748

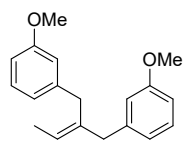

(<sup>1</sup>H NMR, 400 MHz, CDCl<sub>3</sub>)

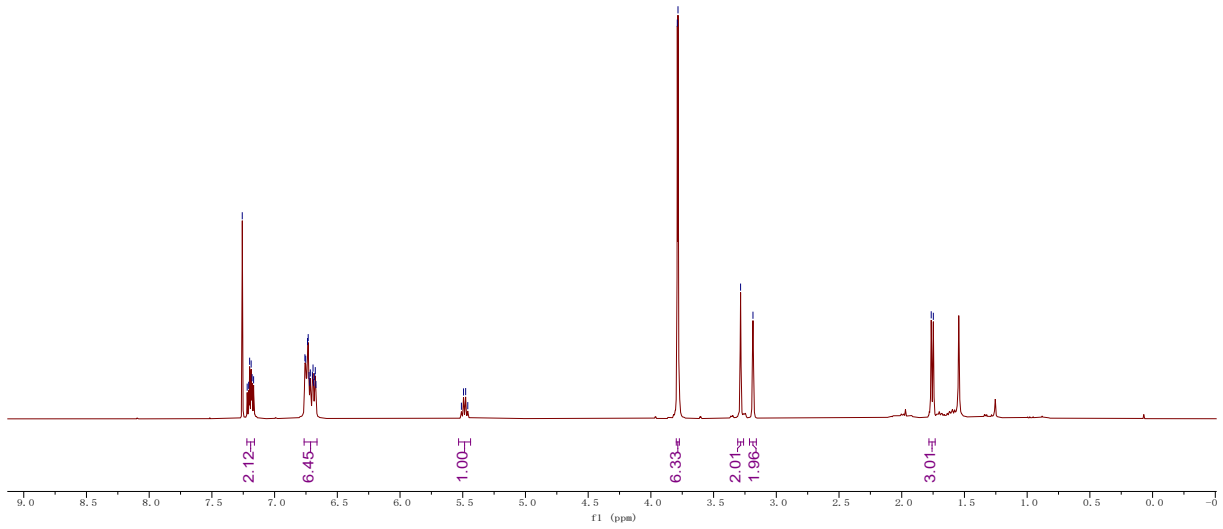

159.673  
159.548  
141.927  
141.716  
137.891  
129.242  
129.100  
122.564  
121.589  
121.135  
114.825  
114.410  
111.192  
111.046

77.213 CDCl<sub>3</sub>  
77.000 CDCl<sub>3</sub>  
76.786 CDCl<sub>3</sub>

55.111

43.062

34.927

13.752

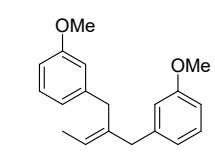

(<sup>13</sup>C NMR, 151 MHz, CDCl<sub>3</sub>)

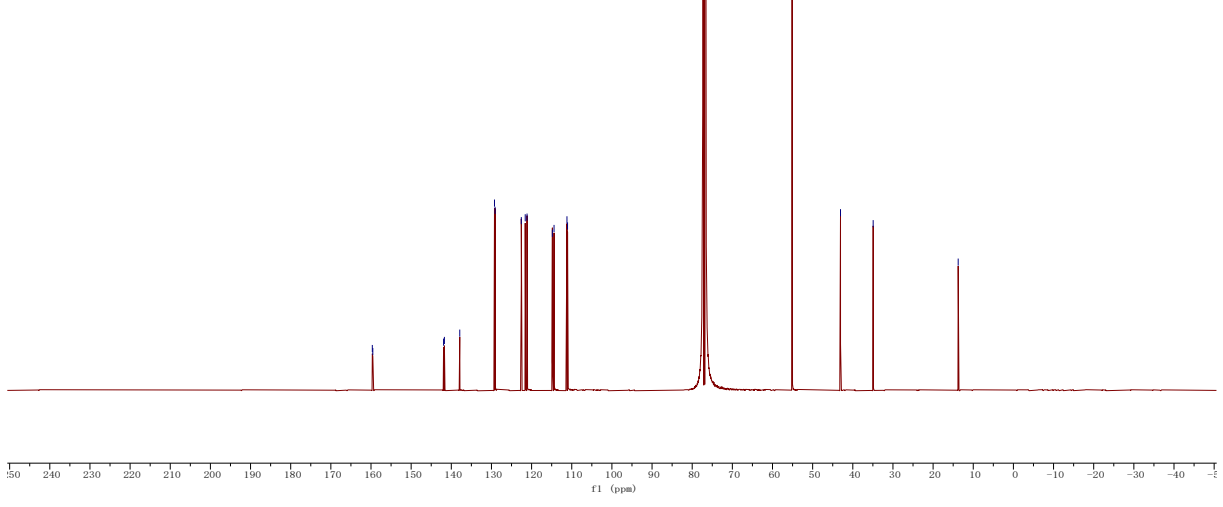

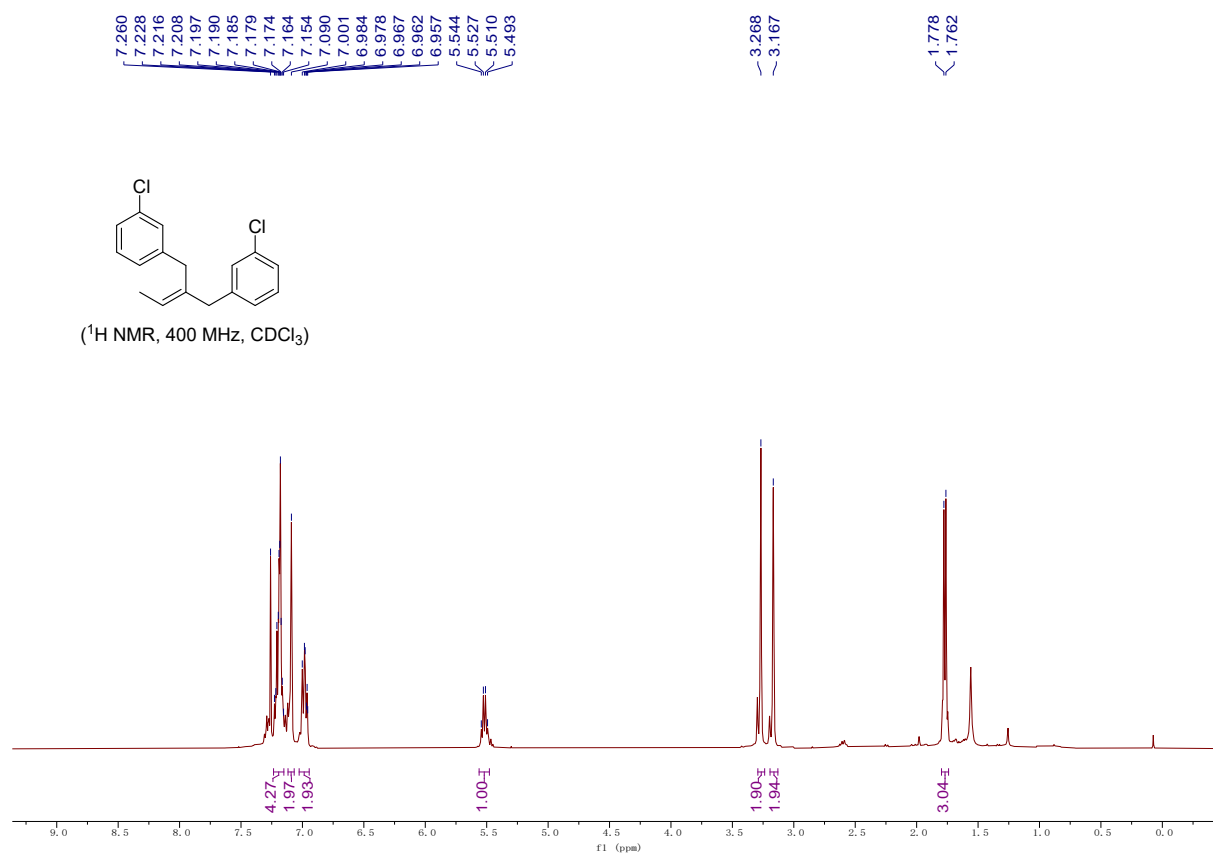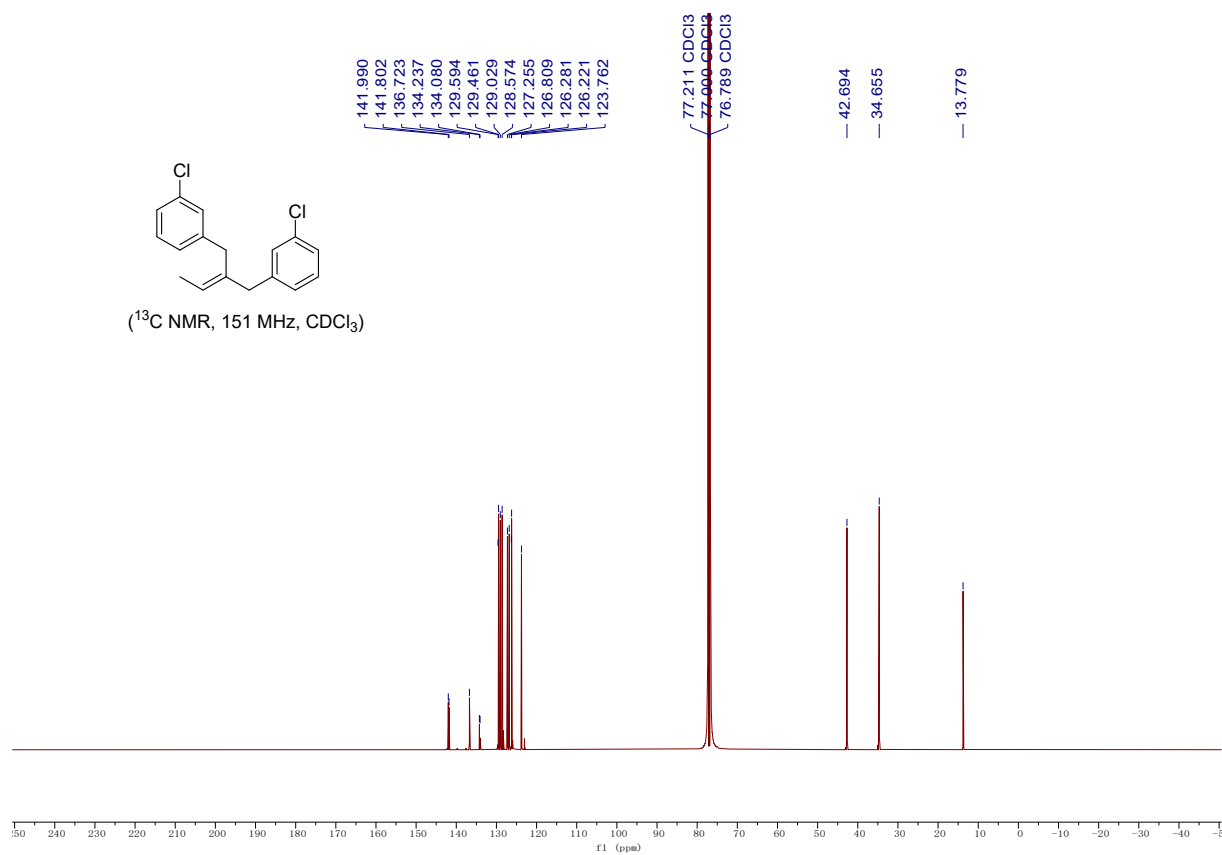

**Containing a trace amount of impurity that failed to be separated.**

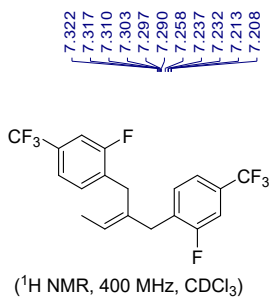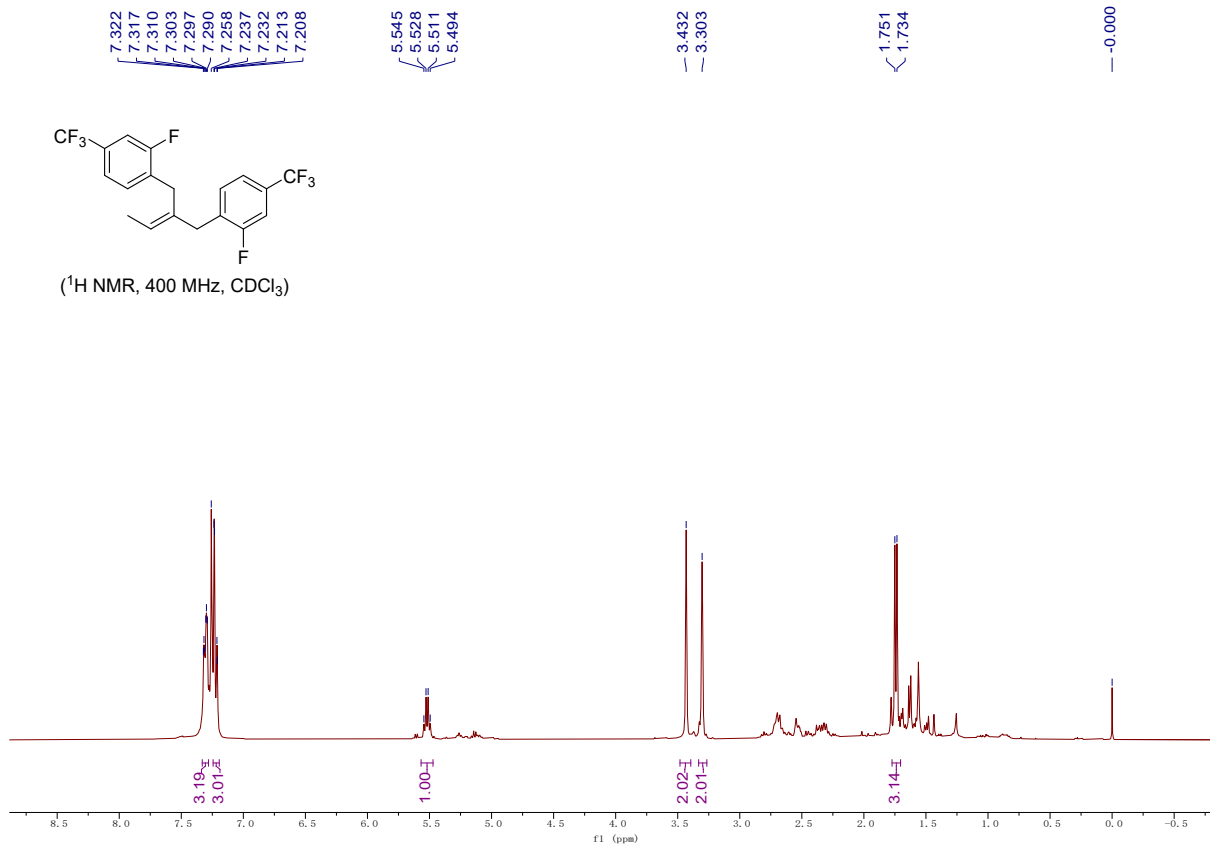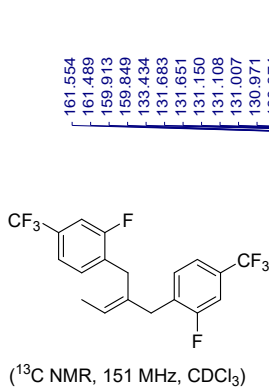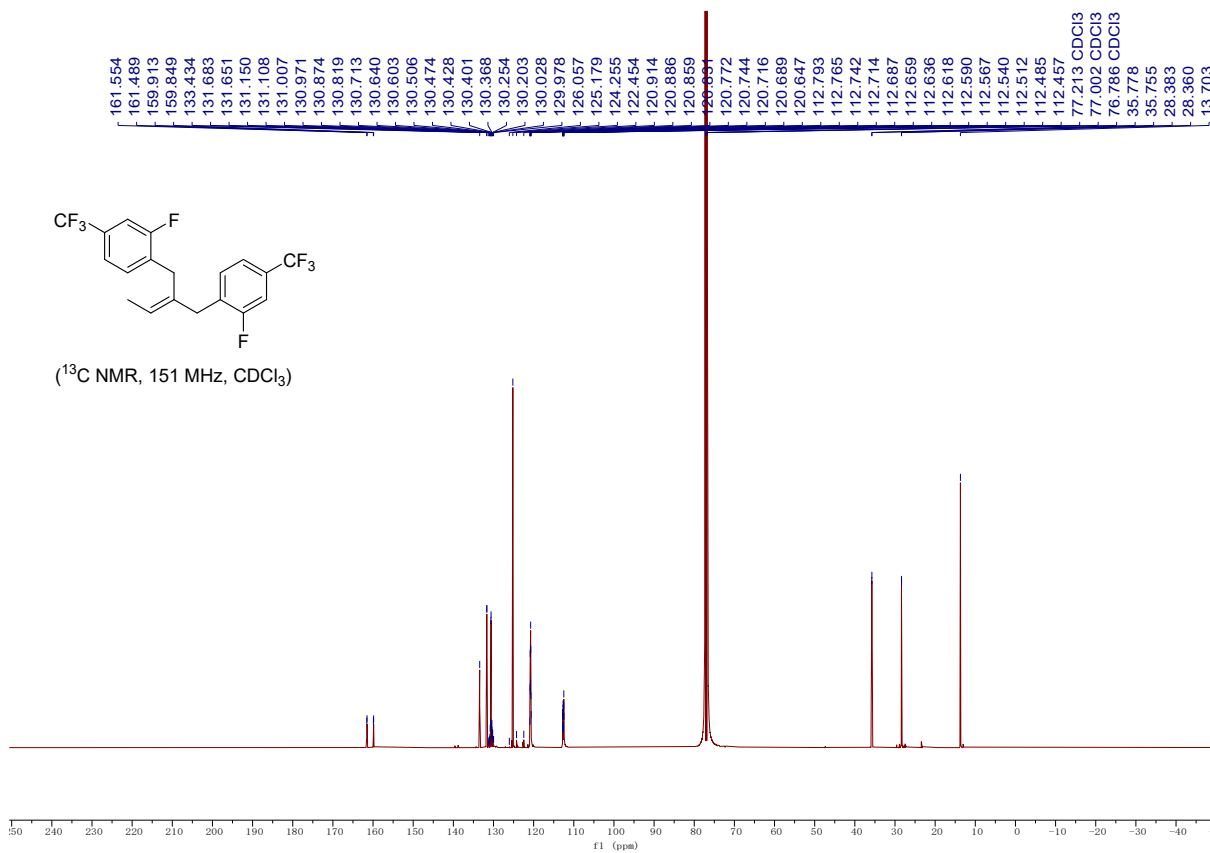



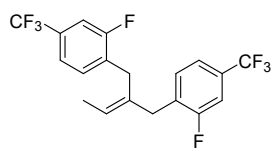

(<sup>19</sup>F NMR, 565 MHz, CDCl<sub>3</sub>)

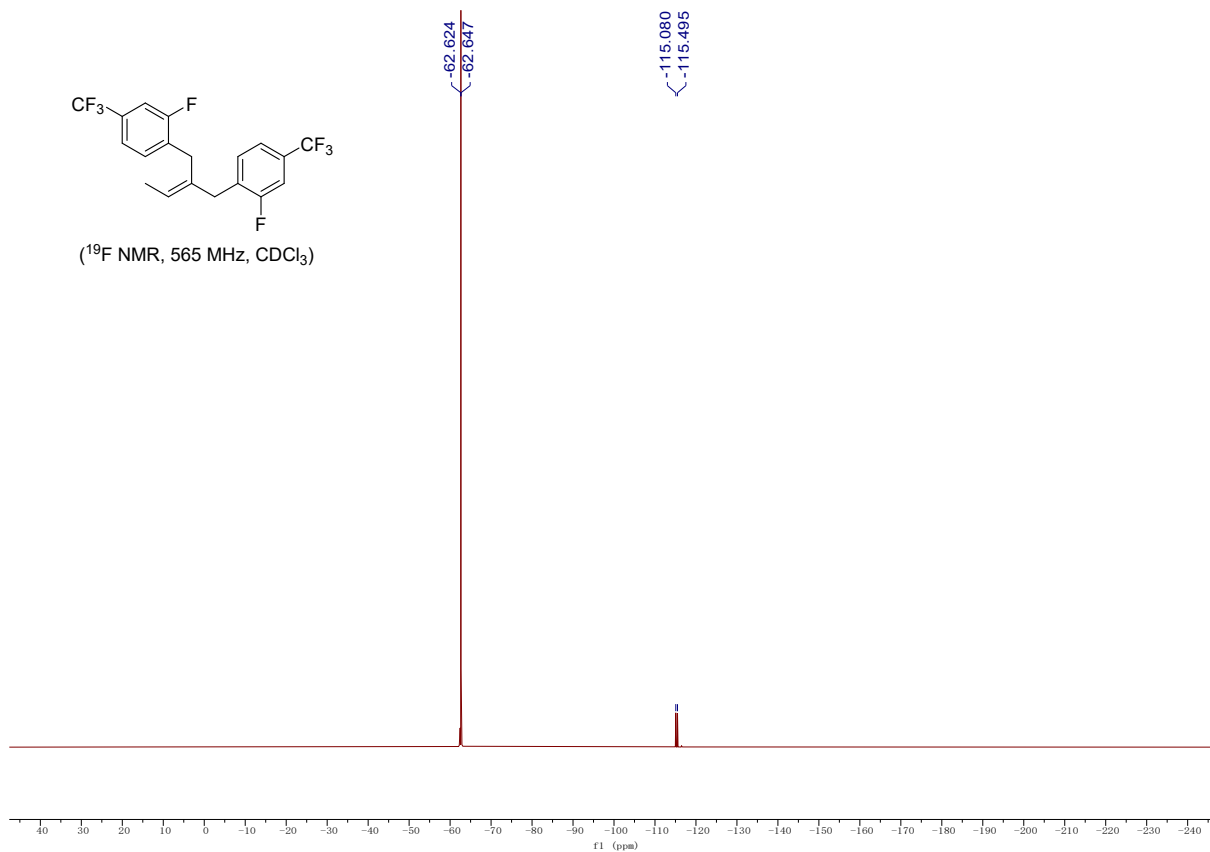

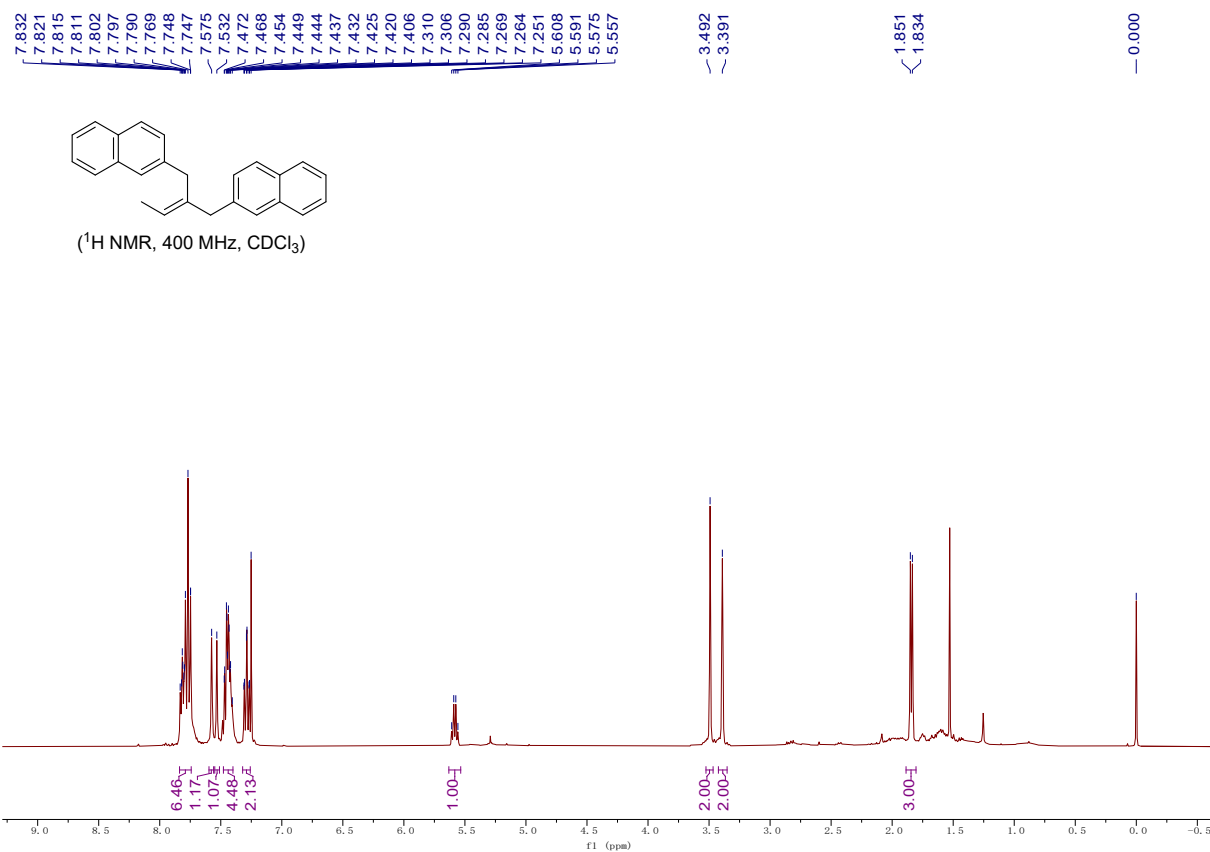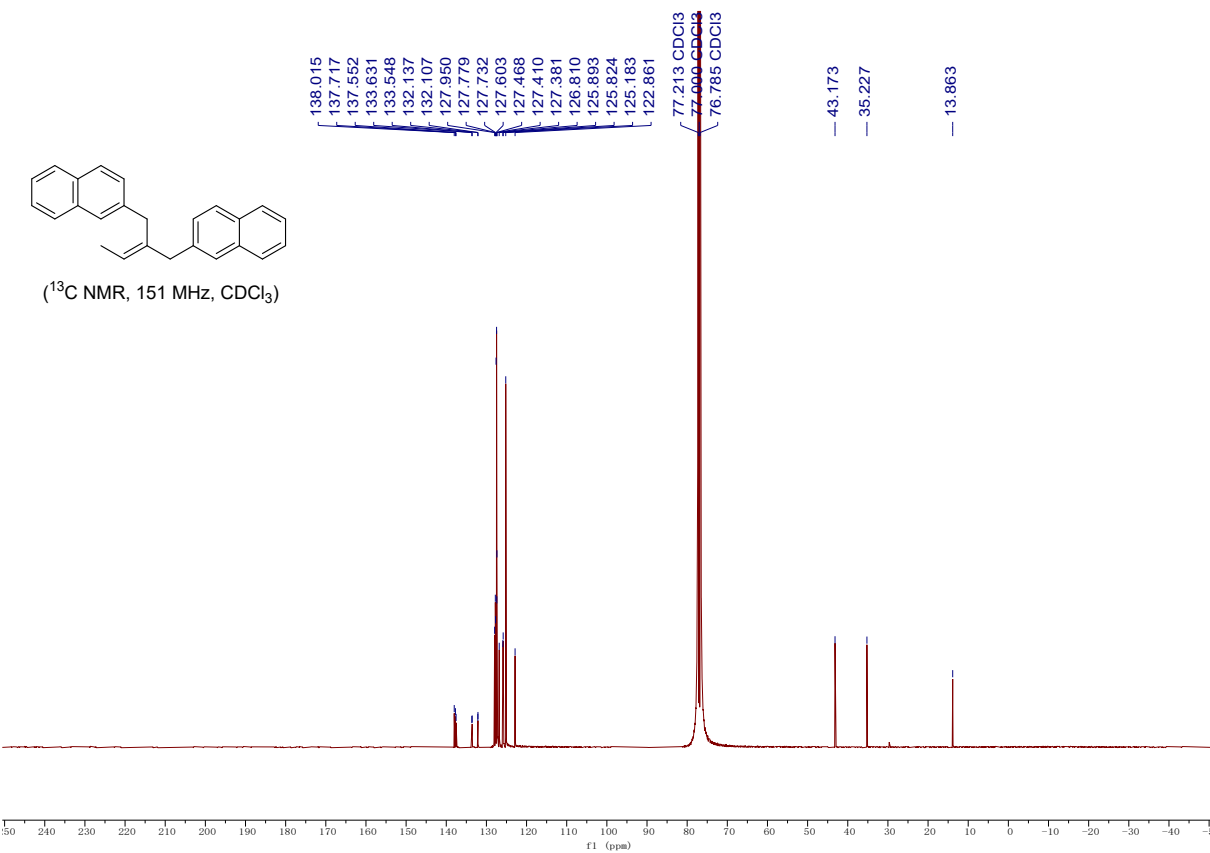

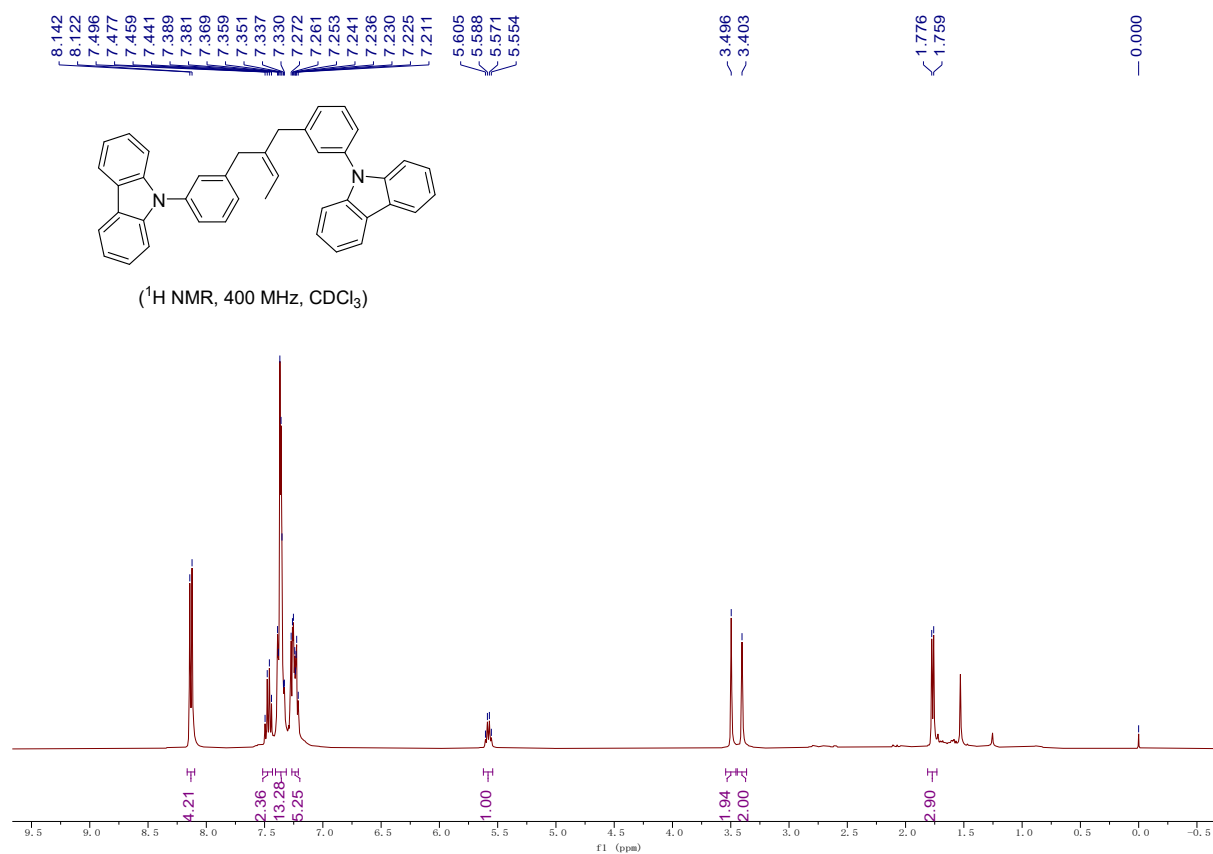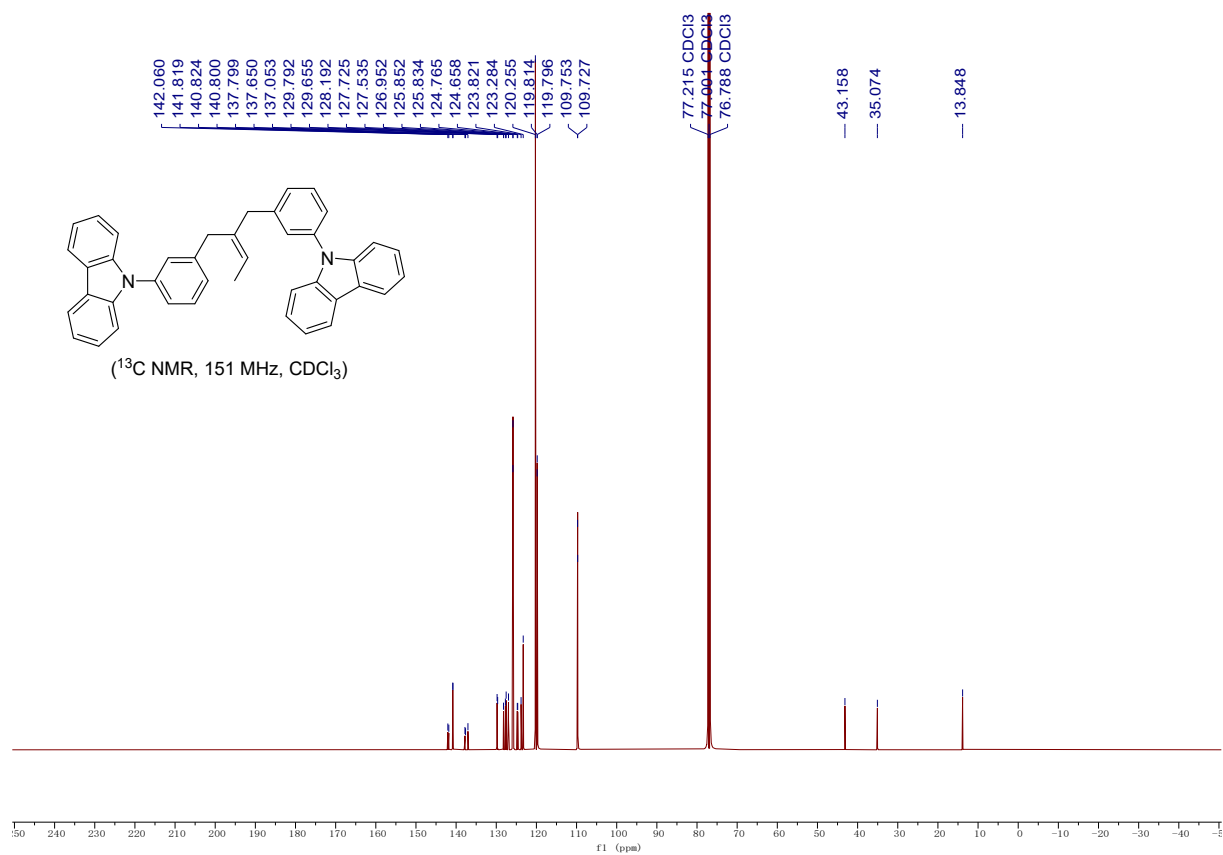

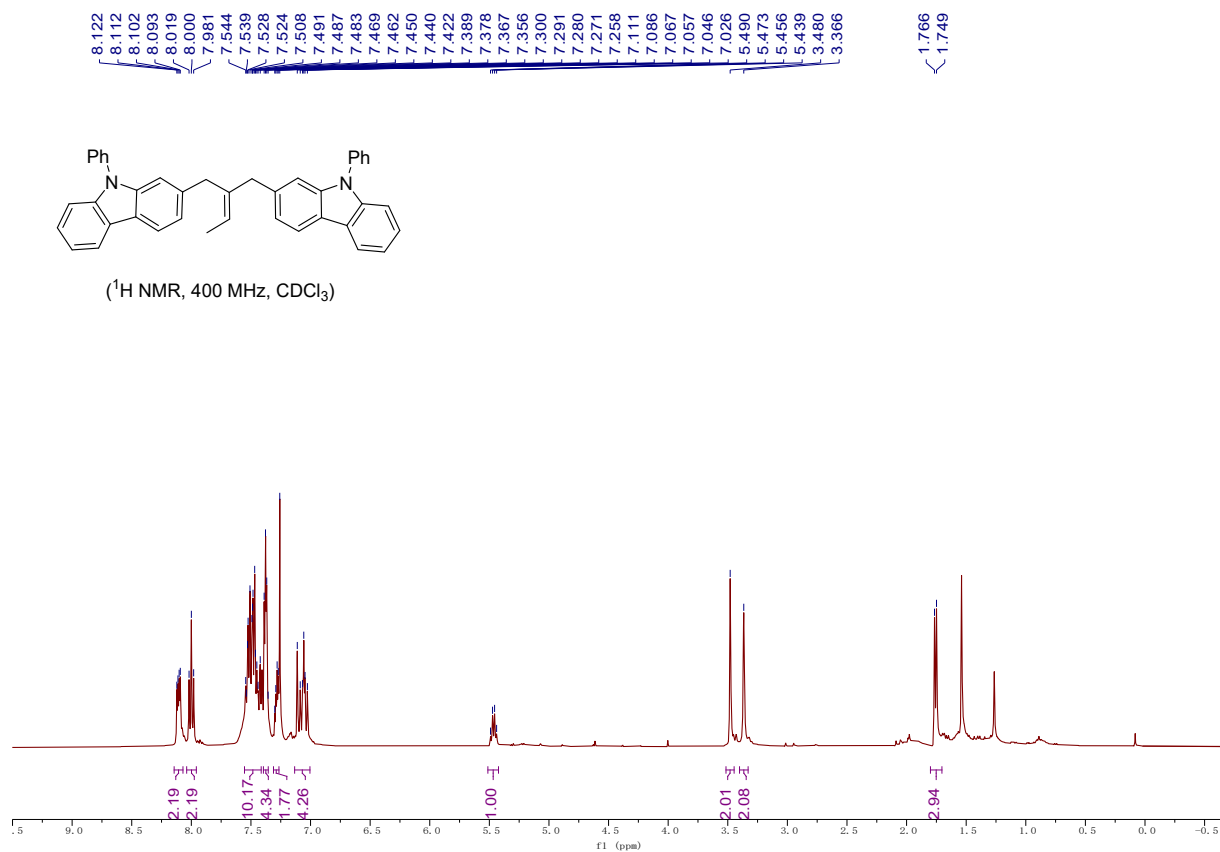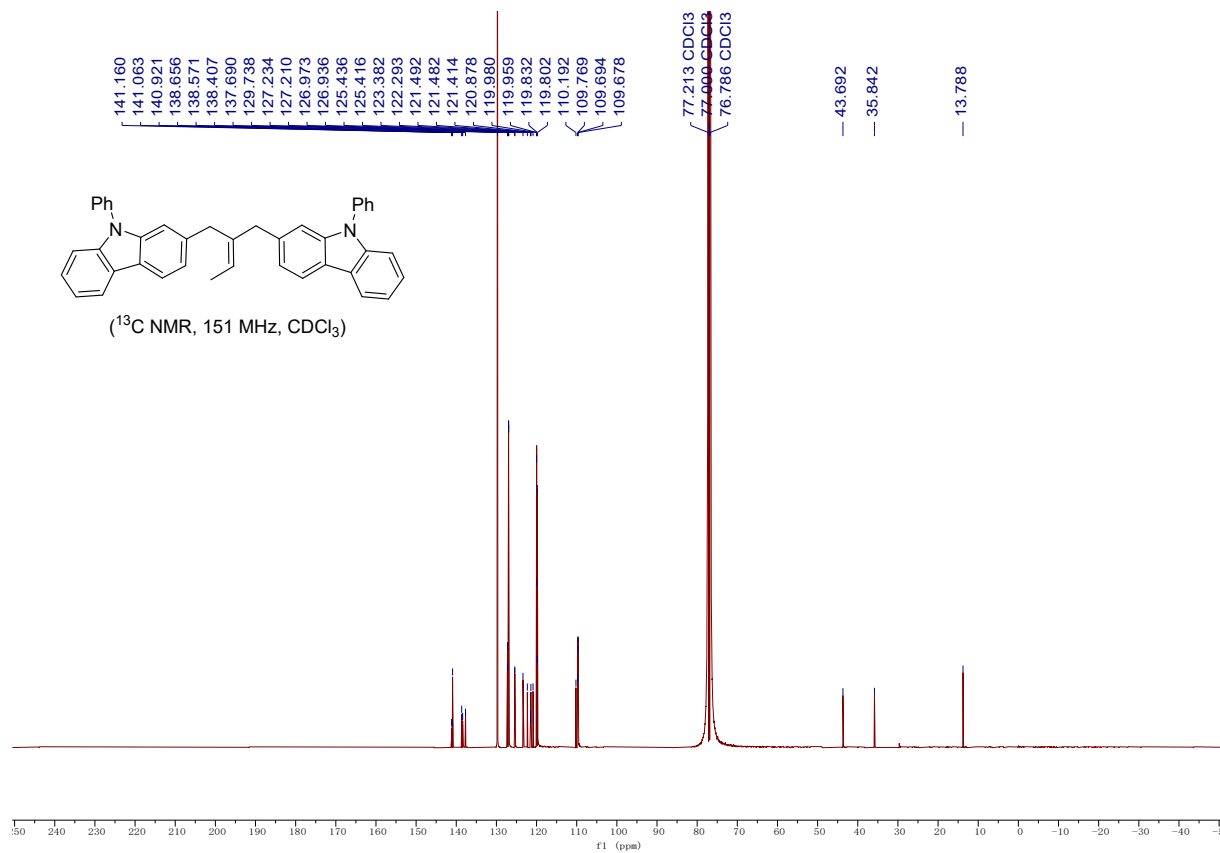

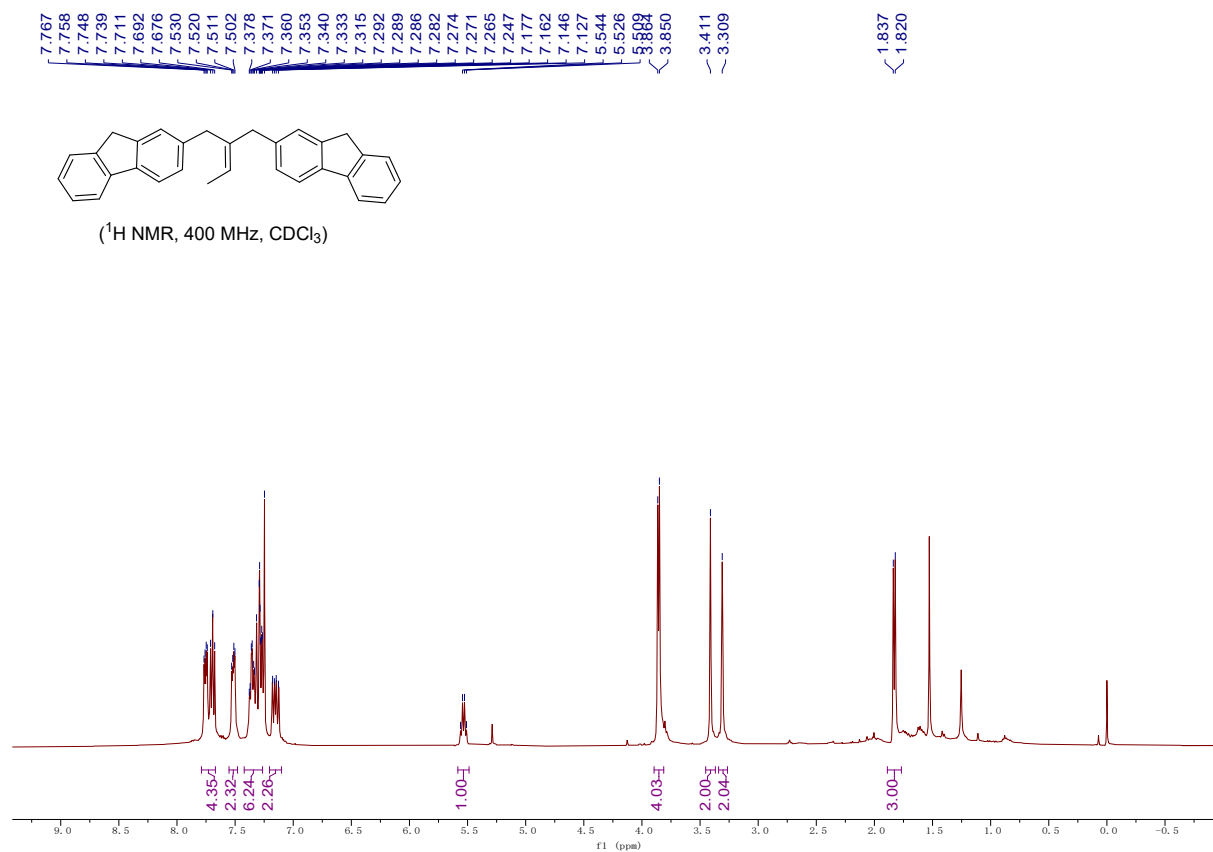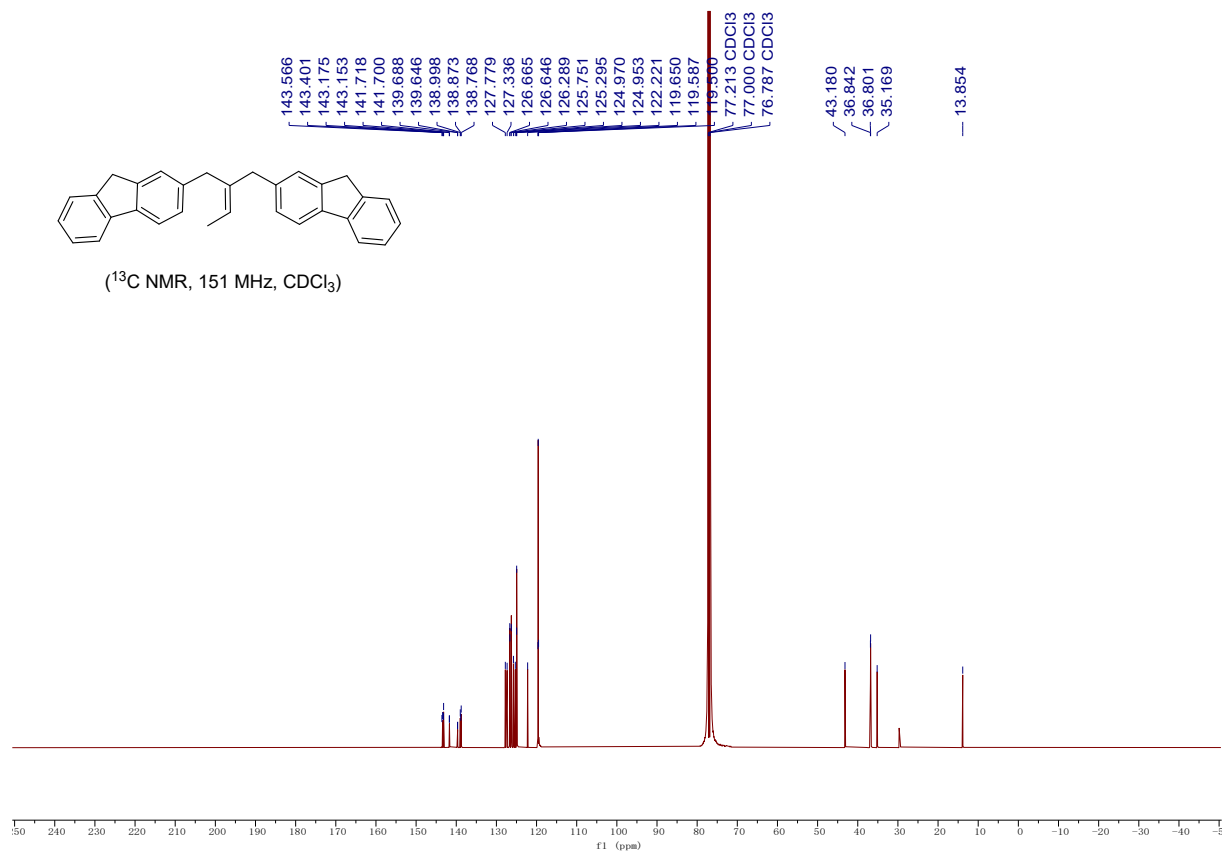

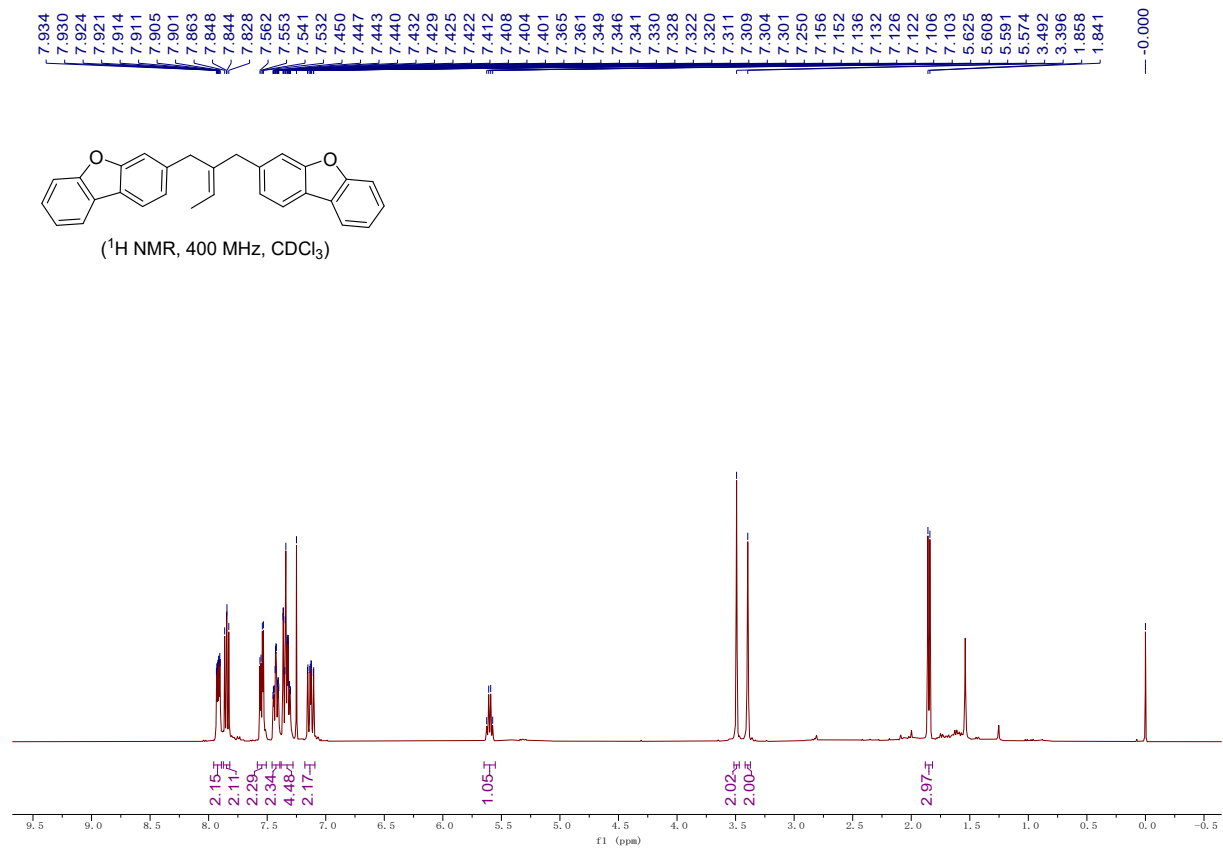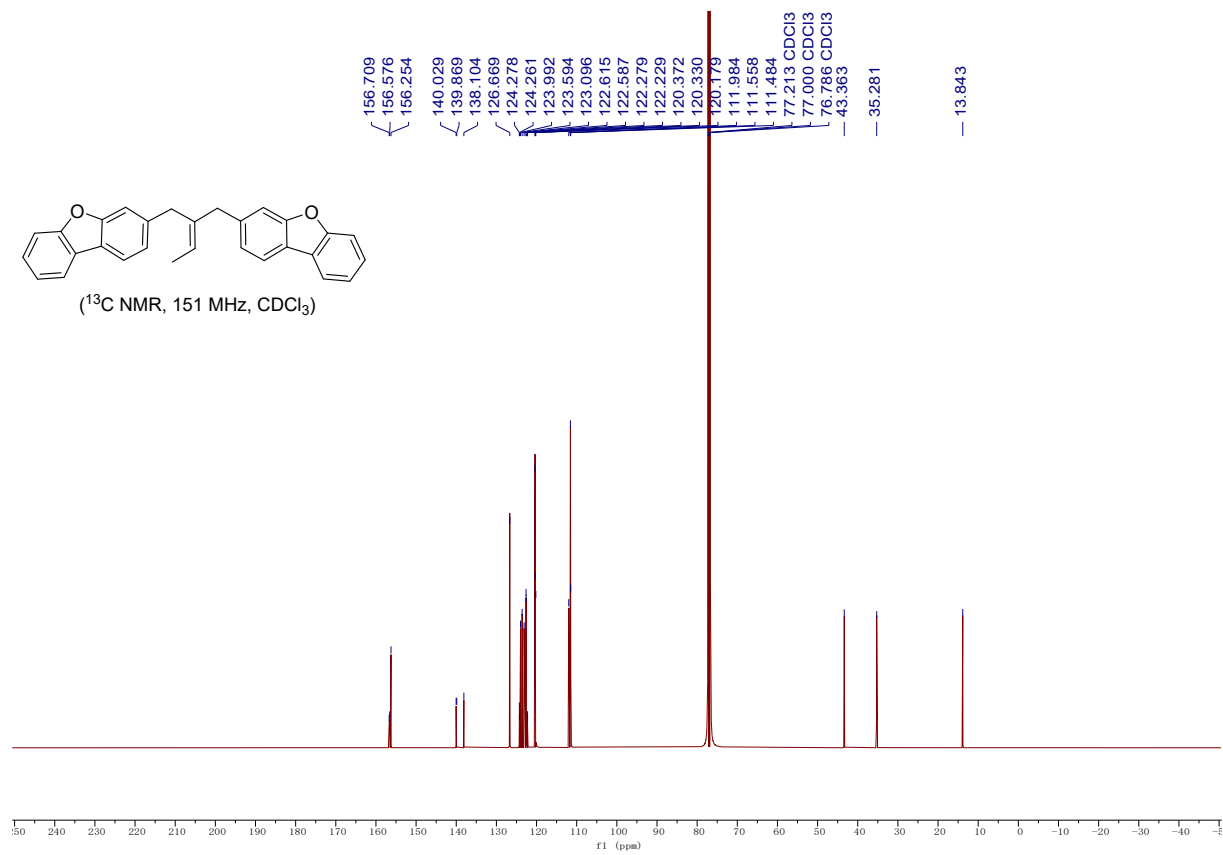

7.800  
7.789  
7.780  
7.769  
— 7.260  
6.785  
6.774  
6.764  
6.754  
6.702

5.579  
5.562  
5.545  
5.529

4.528  
4.521  
4.512  
4.505  
4.496  
4.489

3.284  
3.187  
2.797  
2.792  
2.781  
2.776  
2.765  
2.760

1.767  
1.750

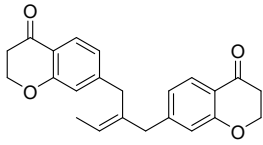

(<sup>1</sup>H NMR, 400 MHz, CDCl<sub>3</sub>)

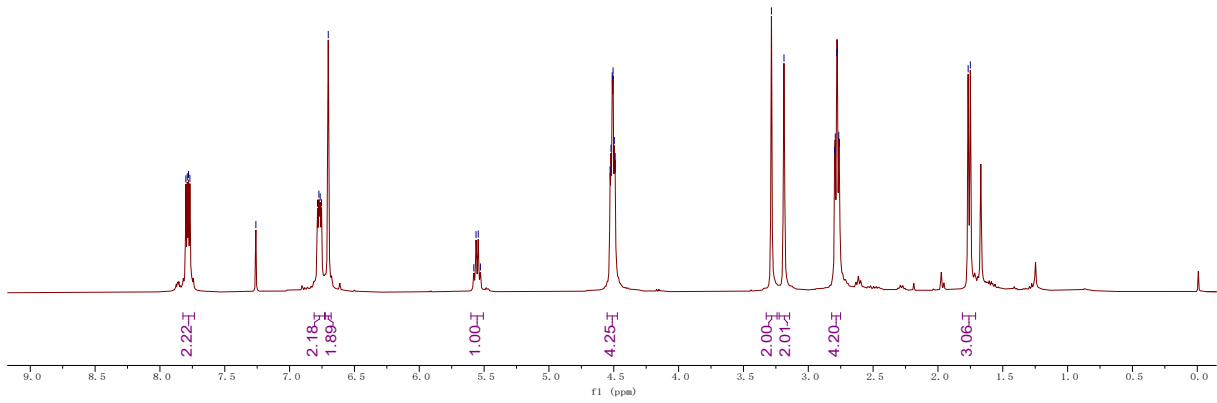

191.525  
191.486  
161.960  
161.837  
149.296  
149.118  
135.860  
127.177  
127.033  
124.568  
122.524  
122.125  
119.802  
119.565  
117.855  
117.827

77.212 CDCl3  
77.000 CDCl3  
76.787 CDCl3  
67.036  
67.014

43.355  
37.674  
35.352

13.828

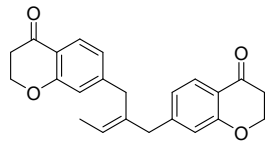

(<sup>13</sup>C NMR, 151 MHz, CDCl<sub>3</sub>)

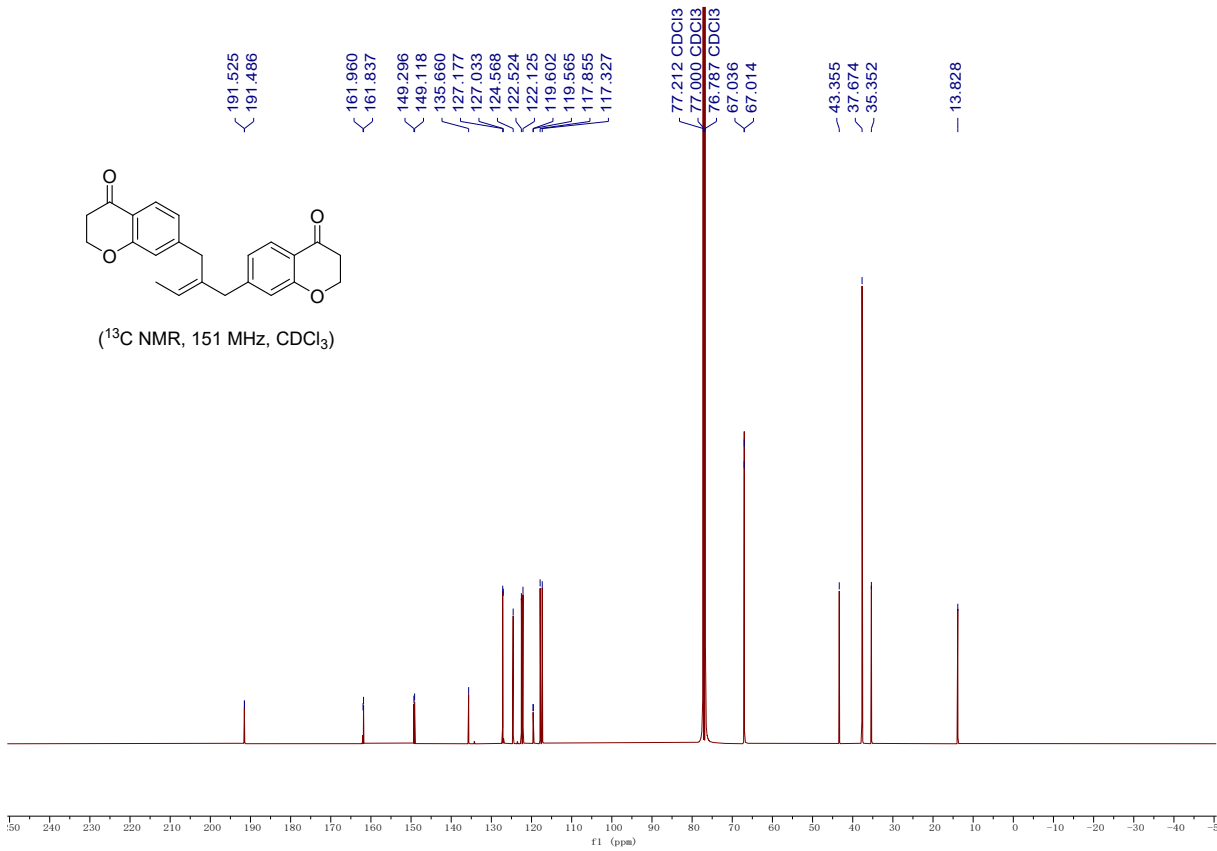

7.969  
7.964  
7.959  
7.951  
7.943  
7.939  
7.935  
7.930  
7.925  
7.535  
7.520  
7.515  
7.501  
7.220  
7.200  
7.186  
7.180  
7.167  
7.147  
5.570  
5.554  
5.537  
5.521  
5.504

3.915  
3.909  
3.340  
3.234

1.789  
1.776

-0.000

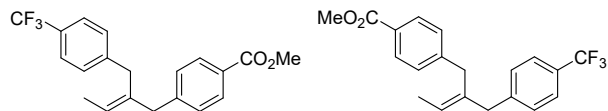

(<sup>1</sup>H NMR, 400 MHz, CDCl<sub>3</sub>, Z/E mixture)

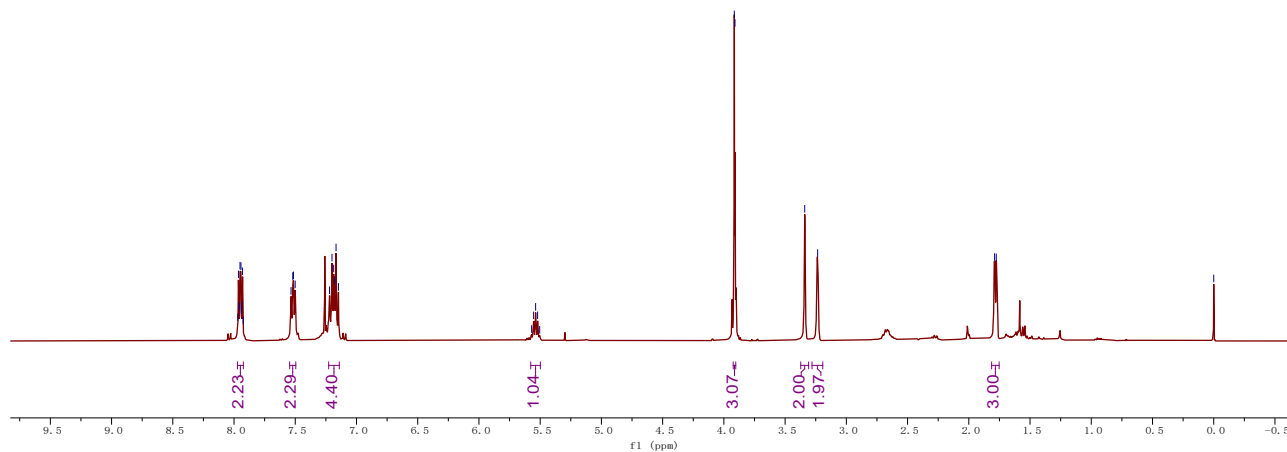

167.076  
167.053  
145.318  
145.217  
144.003  
143.861  
136.613  
136.534  
129.769  
129.631  
129.305  
129.047  
128.923  
128.827  
128.744  
128.588  
128.514  
128.303  
127.002  
125.351  
125.324  
125.297  
125.271  
125.204  
125.177  
125.151  
125.125  
125.026  
123.987  
123.945  
123.398  
121.588  
77.211 CDCl<sub>3</sub>  
77.000 CDCl<sub>3</sub>  
76.784 CDCl<sub>3</sub>

52.009  
51.996  
43.061  
42.836  
35.137  
34.903

13.788

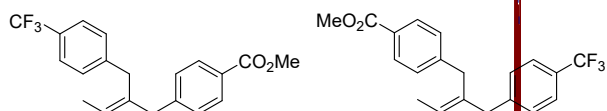

(<sup>13</sup>C NMR, 151 MHz, CDCl<sub>3</sub>, Z/E mixture)

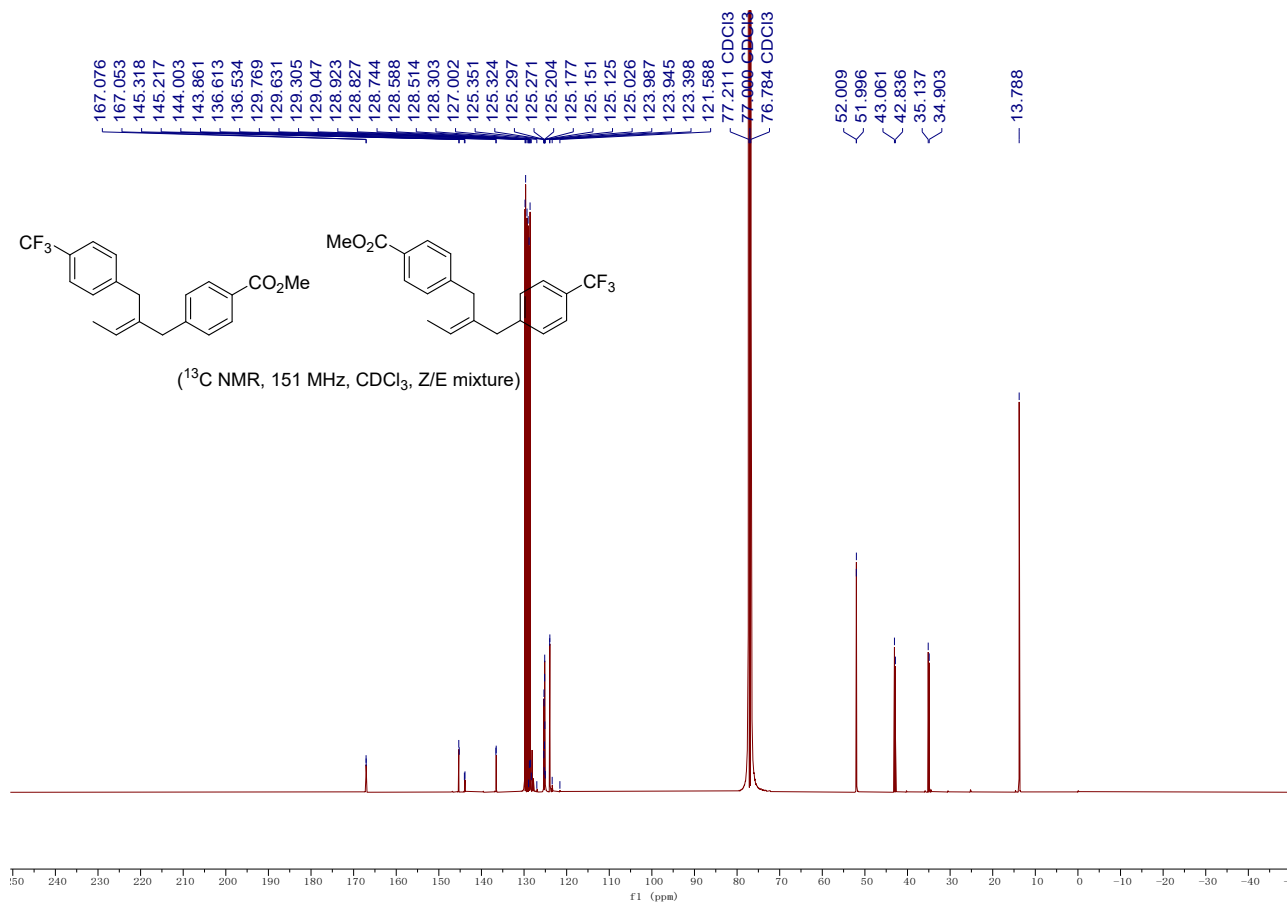



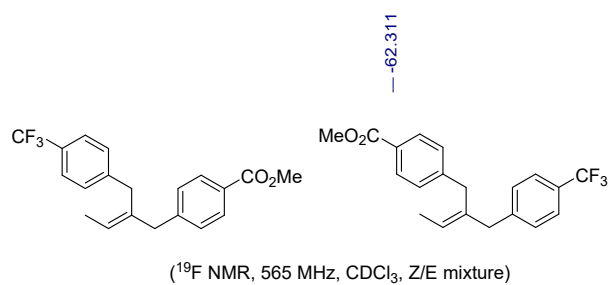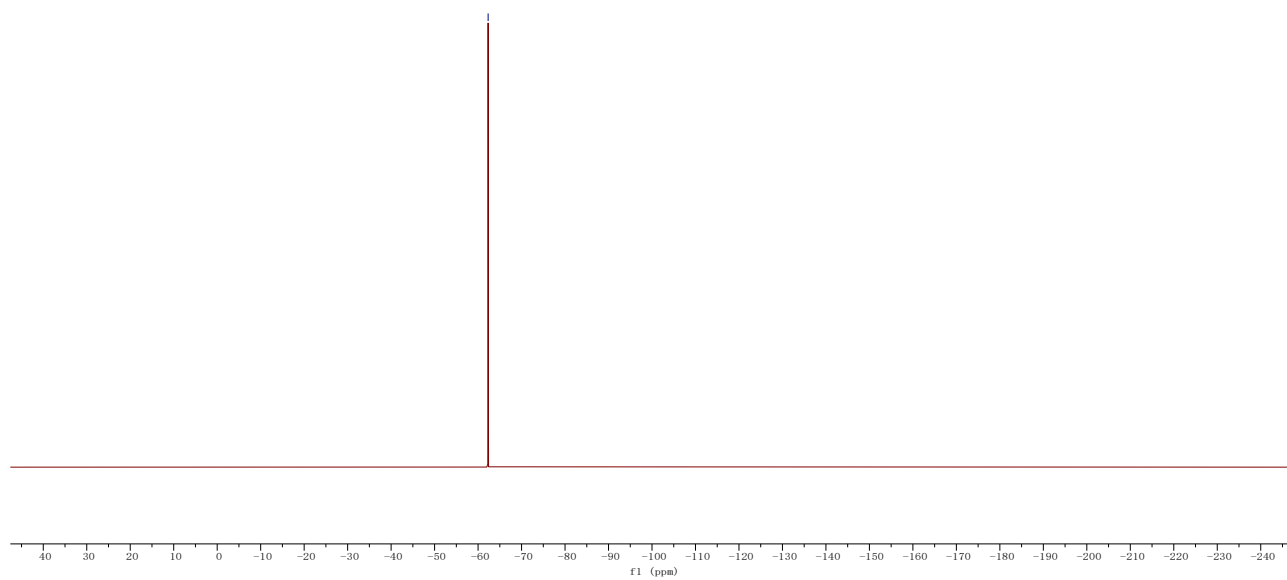

7.845  
7.823  
7.808  
7.800  
7.788  
7.647  
7.497  
7.480  
7.461  
7.457  
7.440  
7.423  
7.382  
7.361  
7.265

2.825  
2.806  
2.786  
1.788  
1.769  
1.751  
1.732  
1.714  
1.432  
1.415  
1.406  
1.397  
1.388  
1.379  
1.361  
0.961  
0.945  
0.928

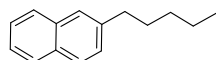

(<sup>1</sup>H NMR, 400 MHz, CDCl<sub>3</sub>)

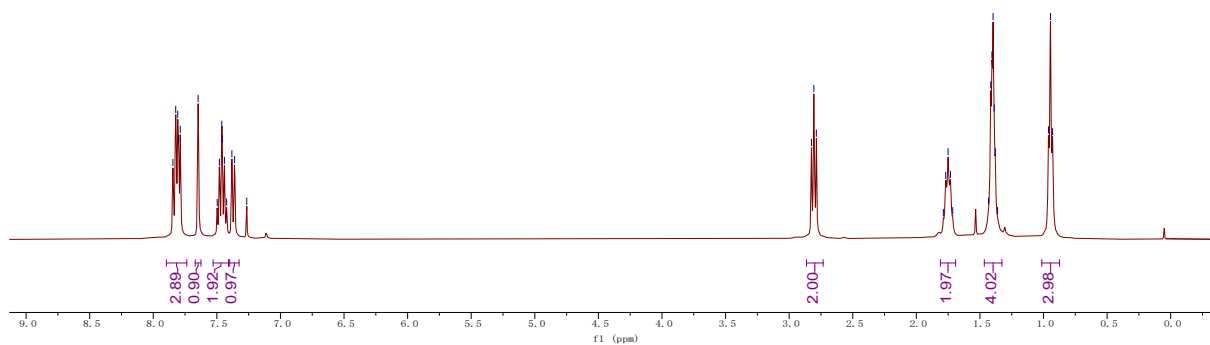

140.445  
133.623  
131.901  
127.691  
127.572  
127.436  
127.370  
126.257  
125.769  
124.947

77.212 CDCl<sub>3</sub>  
77.000 CDCl<sub>3</sub>  
76.786 CDCl<sub>3</sub>

36.076  
31.528  
31.055  
22.571  
14.037

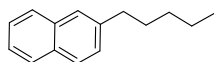

(<sup>13</sup>C NMR, 151 MHz, CDCl<sub>3</sub>)

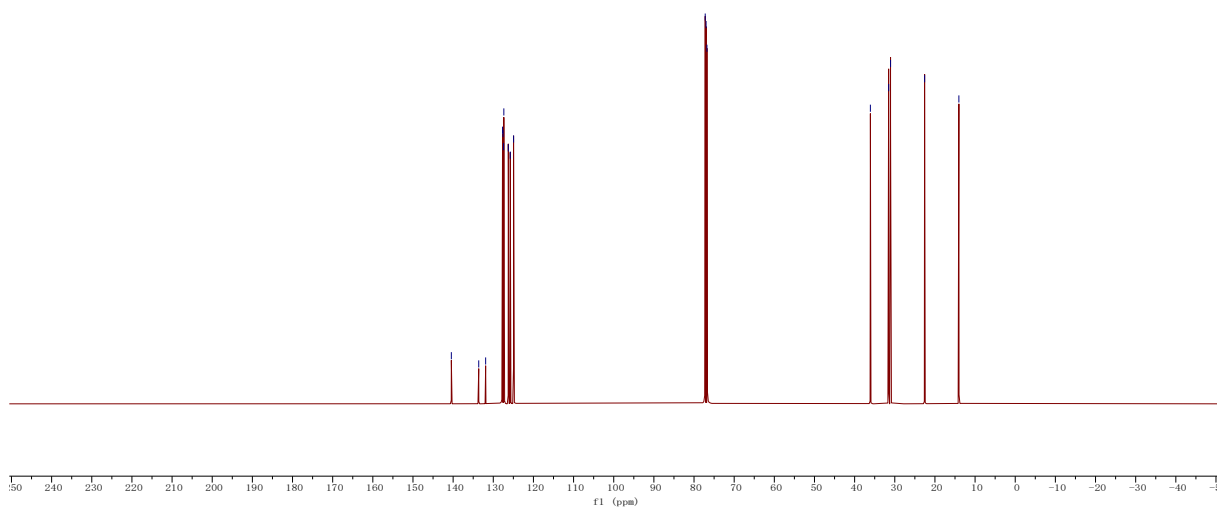

7.839  
7.815  
7.804  
7.795  
7.783  
7.656  
7.489  
7.476  
7.472  
7.457  
7.452  
7.438  
7.434  
7.420  
7.395  
7.391  
7.374  
7.370  
5.656  
5.541  
5.528  
5.517  
5.514  
5.504  
5.492  
5.479  
5.465

2.879  
2.860  
2.840  
2.517  
2.512  
2.502  
2.496  
2.490  
2.481  
2.475  
2.463  
1.615  
1.604

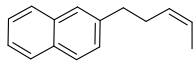

(<sup>1</sup>H NMR, 400 MHz, CDCl<sub>3</sub>)

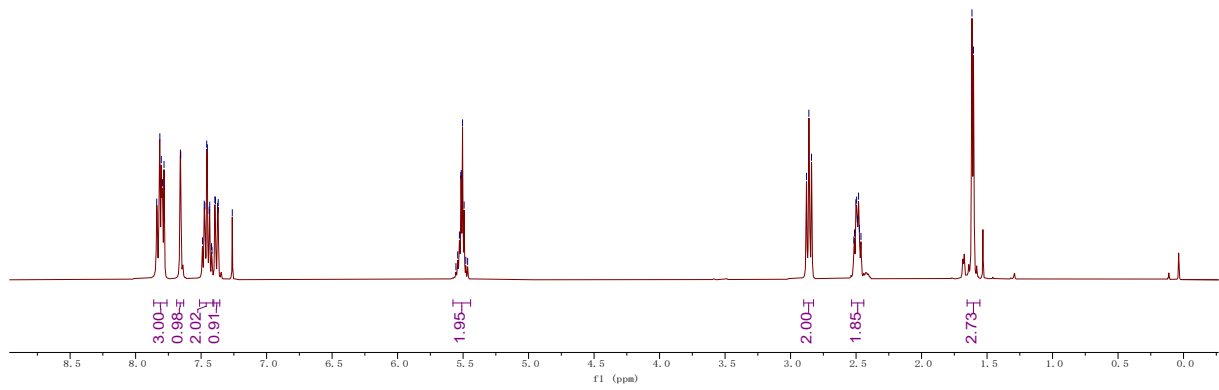

139.670  
133.594  
131.966  
129.564  
127.744  
127.563  
127.418  
127.365  
126.391  
125.807  
125.049  
124.588

77.213 CDCl<sub>3</sub>  
77.000 CDCl<sub>3</sub>  
76.788 CDCl<sub>3</sub>

35.919  
28.634  
12.764

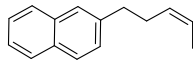

(<sup>13</sup>C NMR, 151 MHz, CDCl<sub>3</sub>)

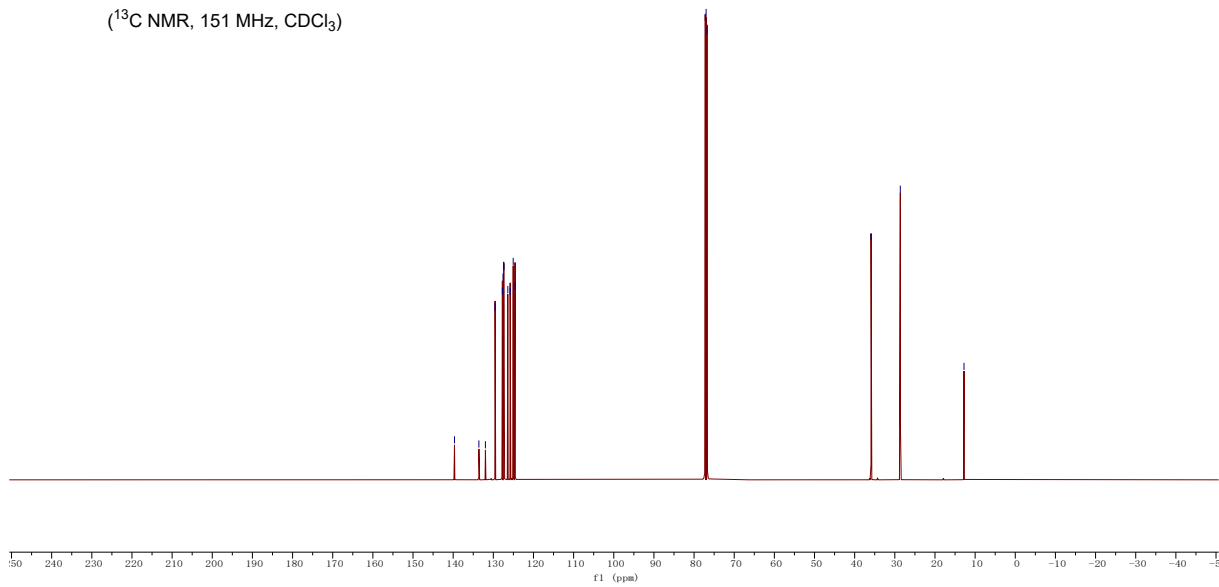

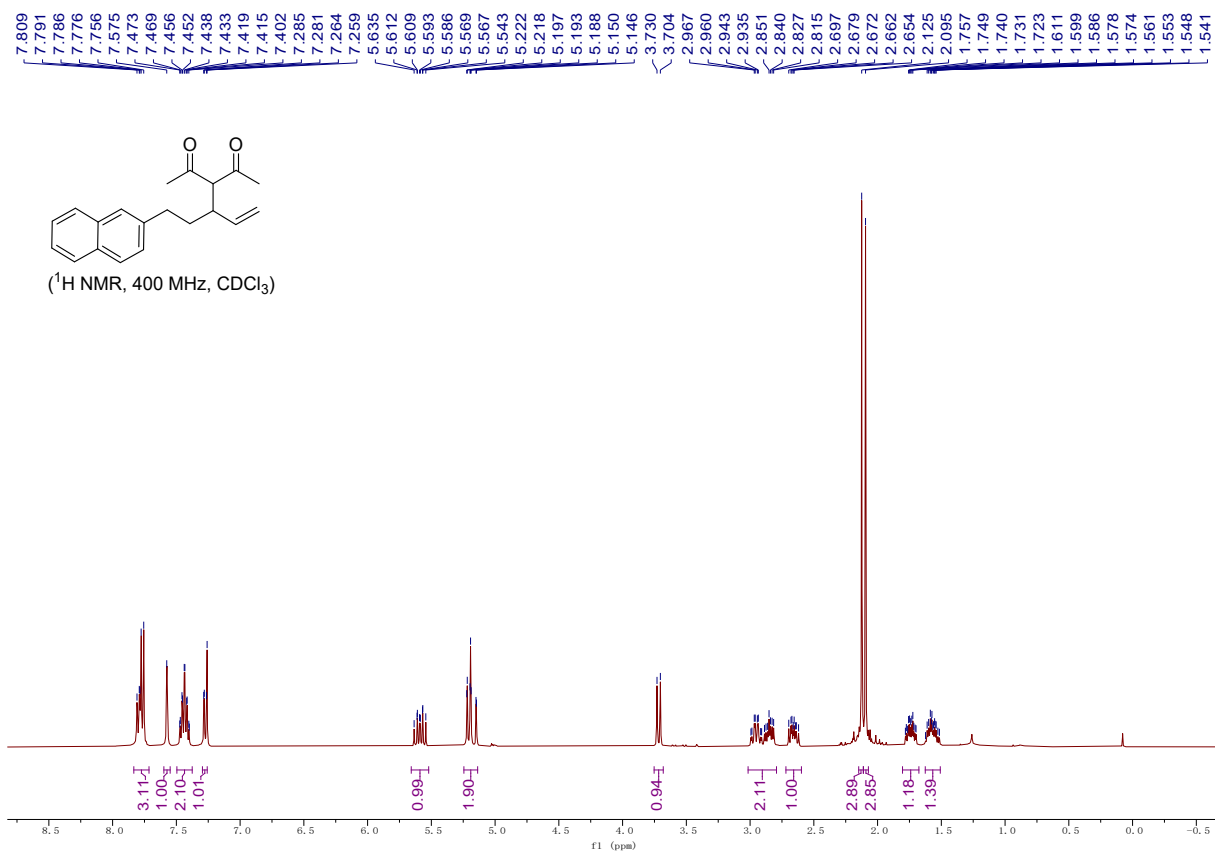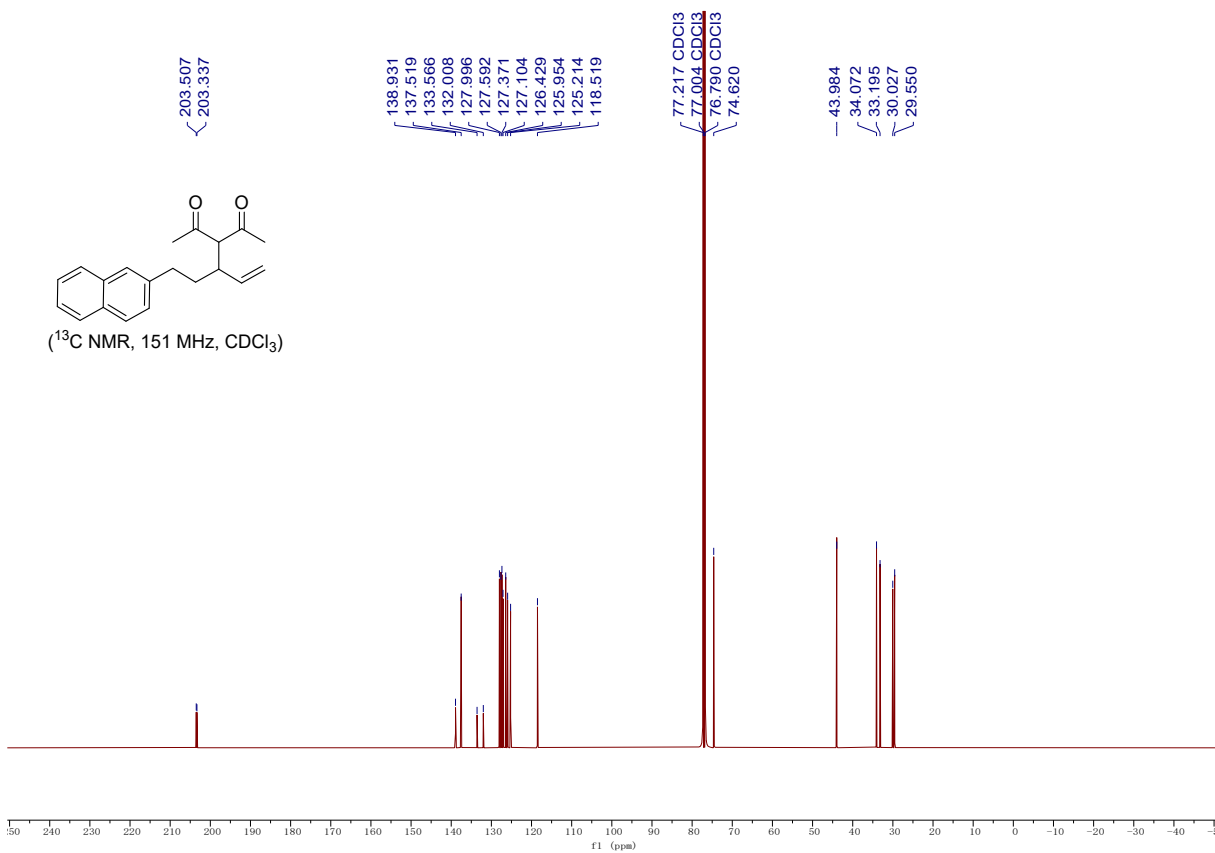

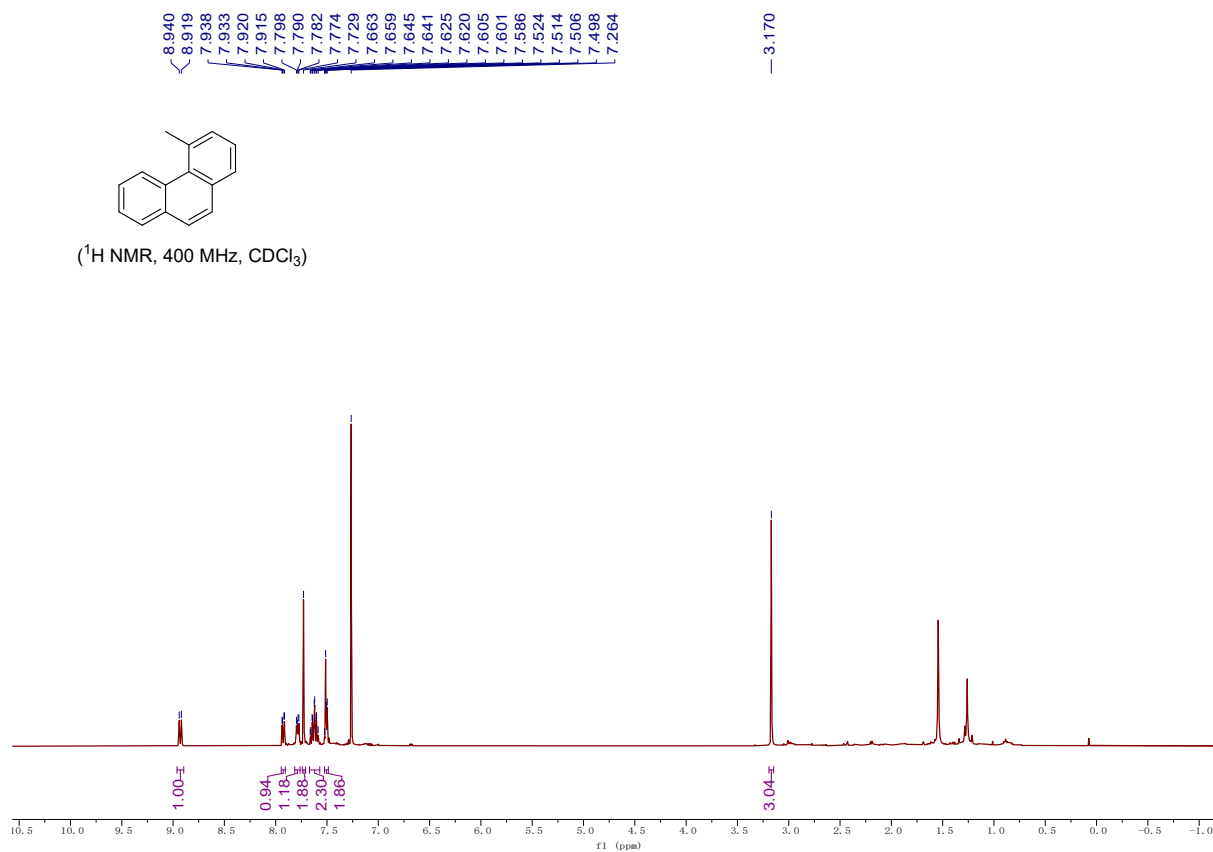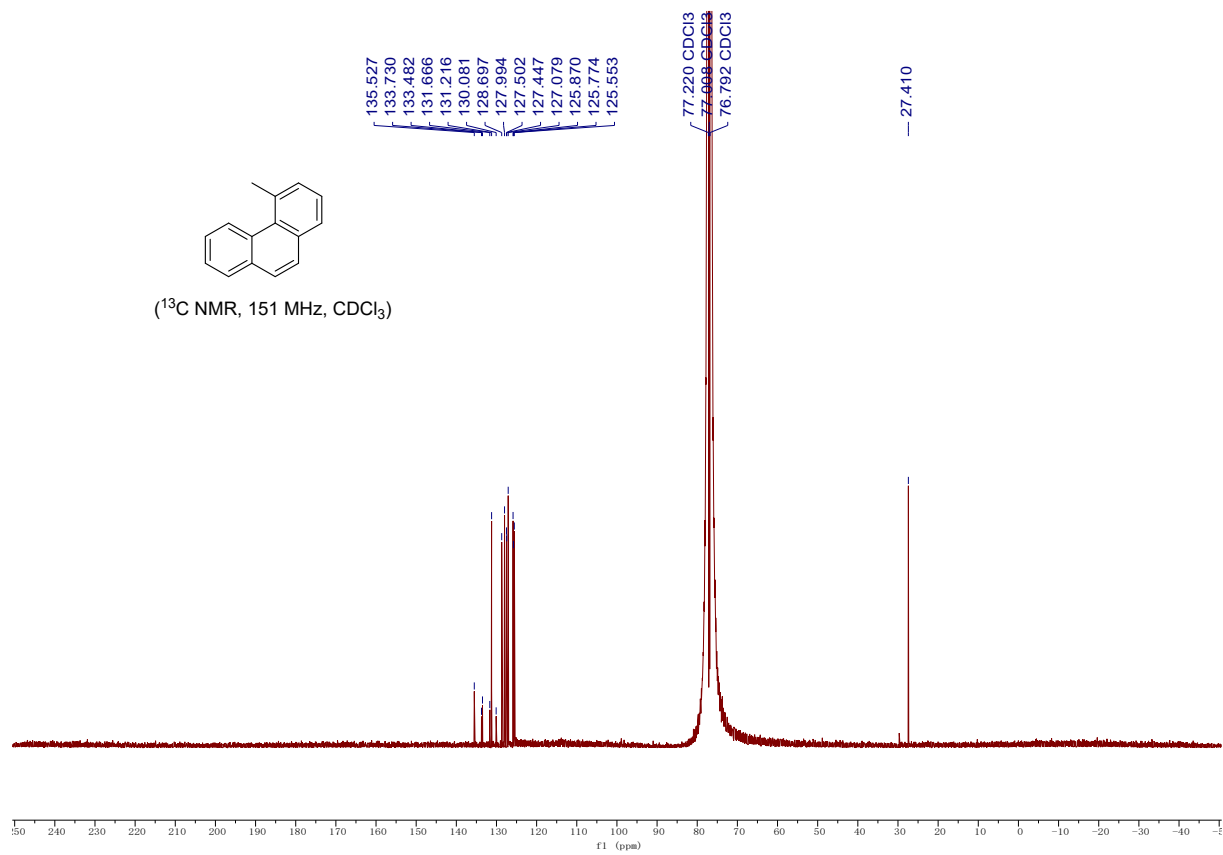

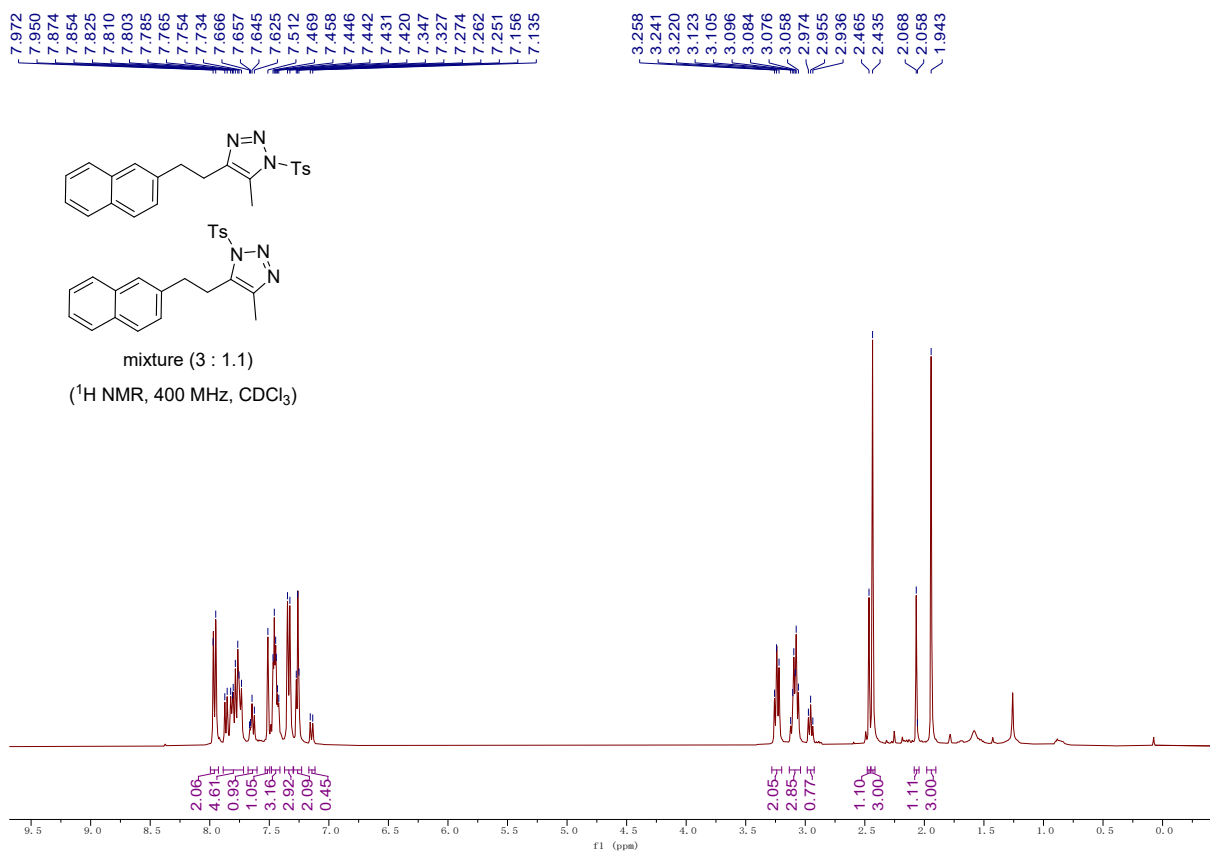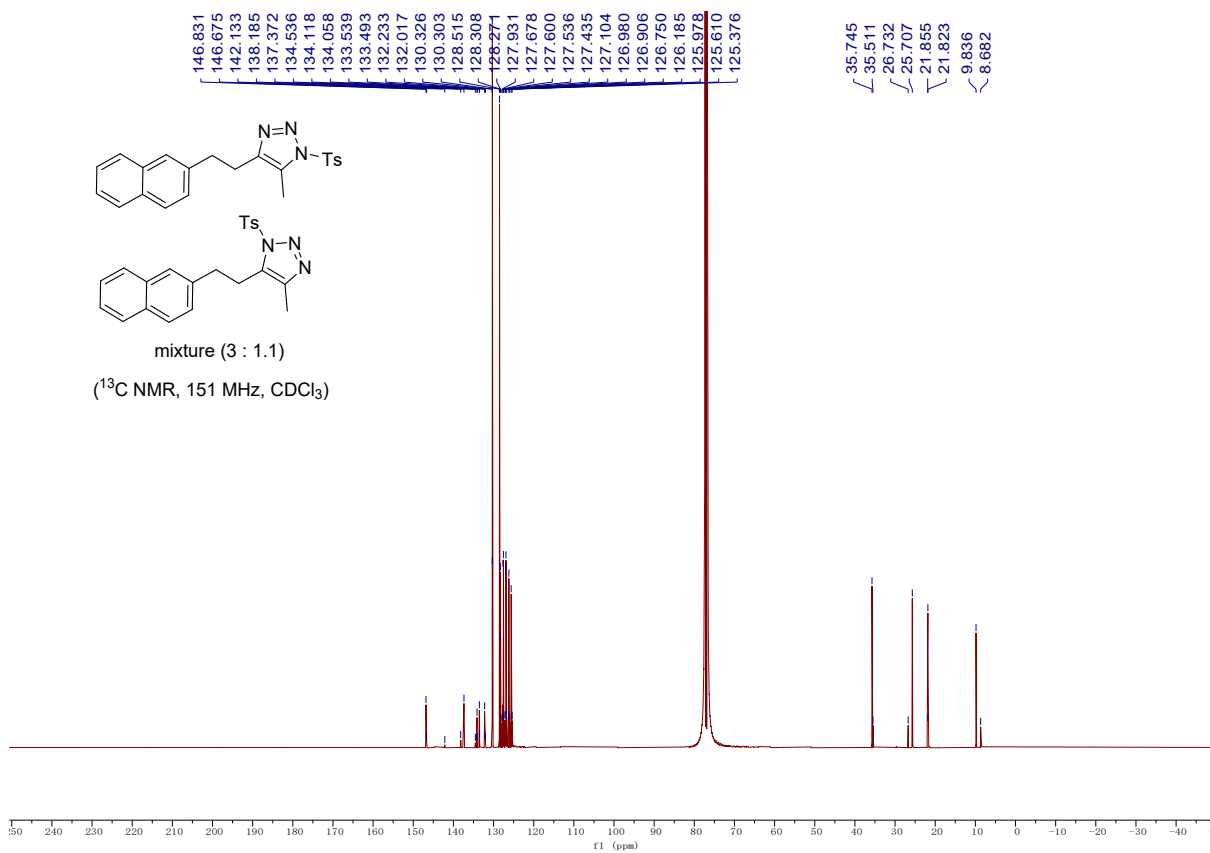

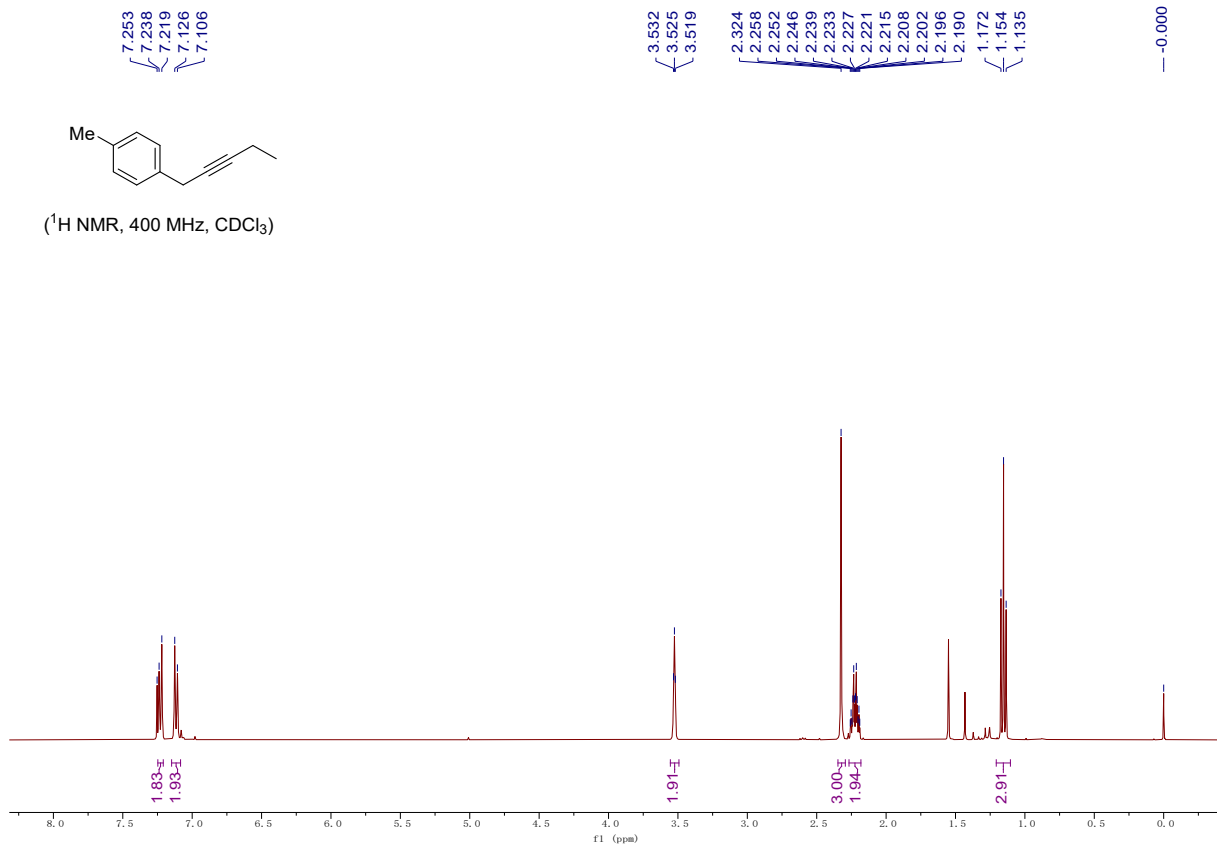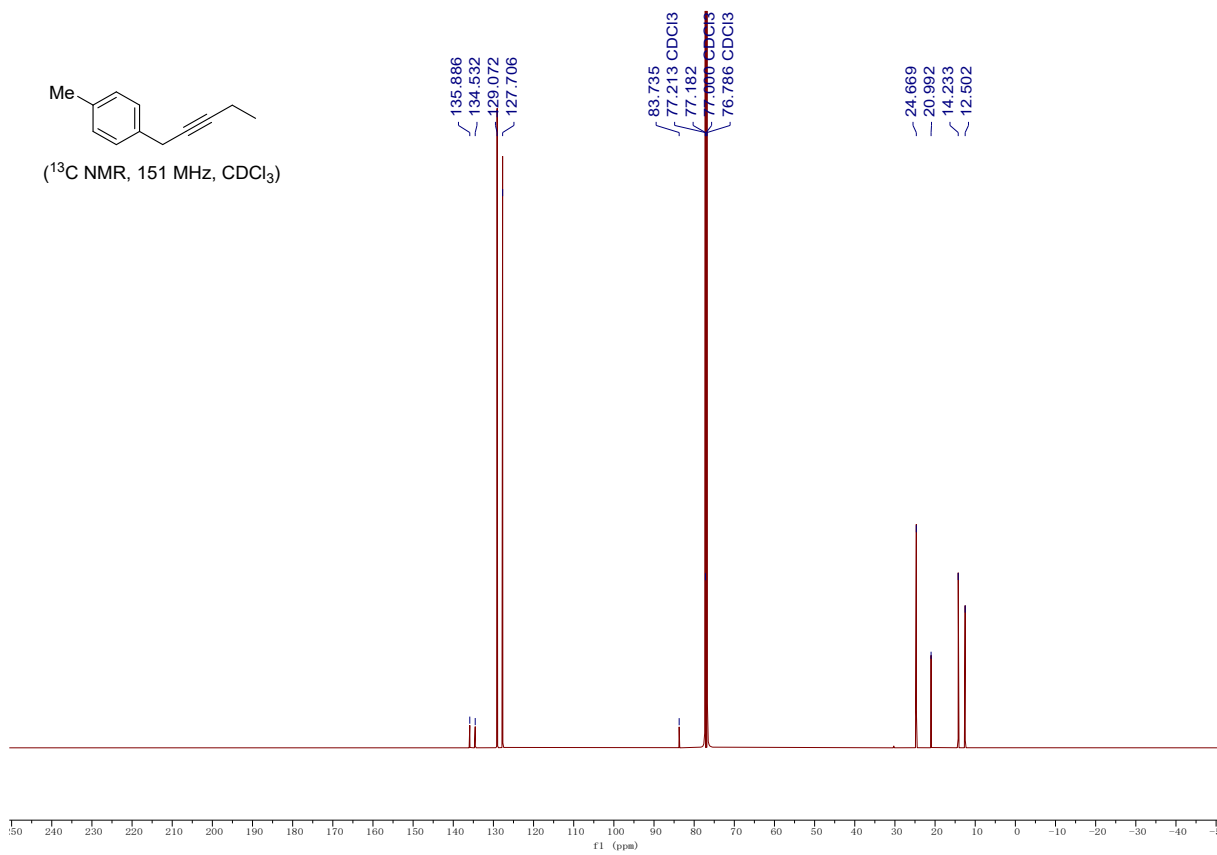

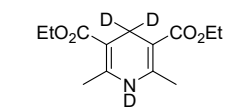

(<sup>1</sup>H NMR, 400 MHz, CDCl<sub>3</sub>)

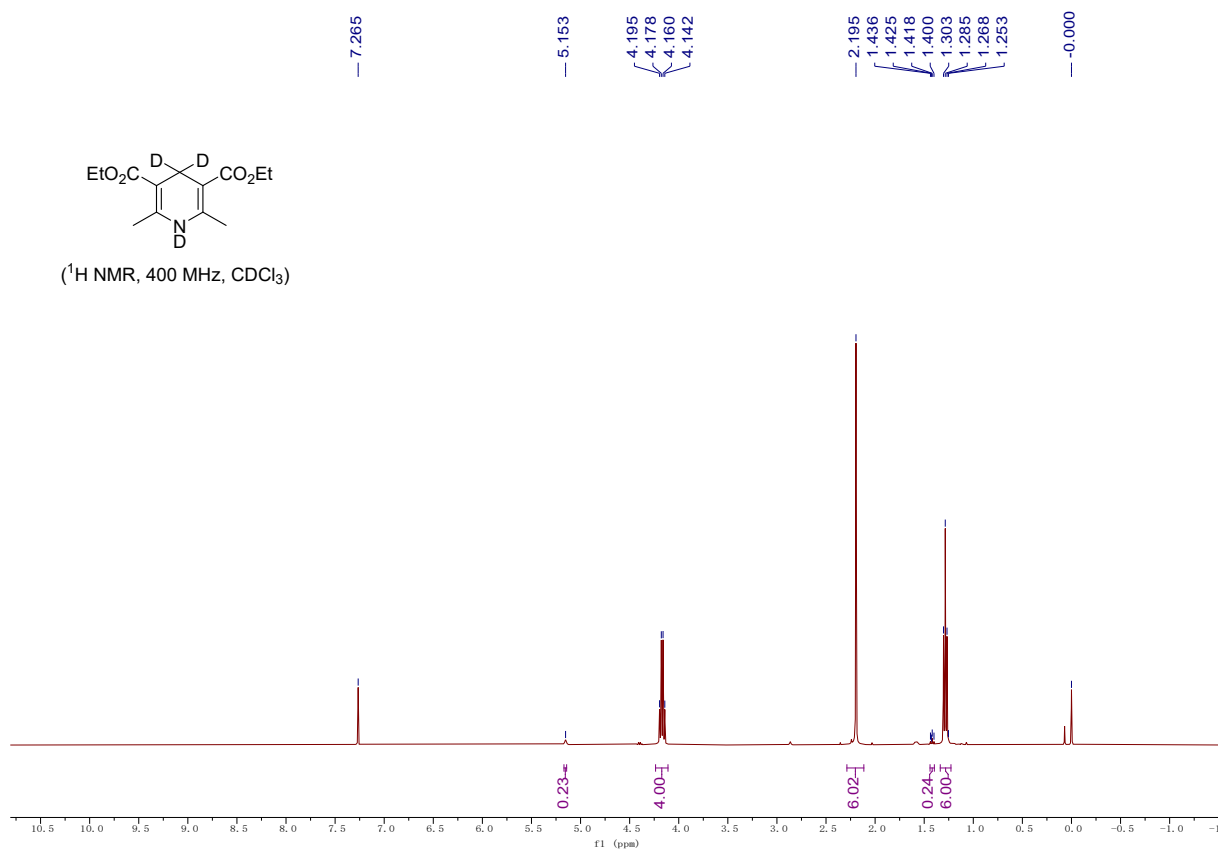



## 12. Reference

- 1) L. M. Kammer, S. O. Badir, R. M. Hu and G. A. Molander, Photoactive electron donor–acceptor complex platform for Ni-mediated C(sp<sup>3</sup>)–C(sp<sup>2</sup>) bond formation. *Chem. Sci.*, 2021, **12**, 5450-5457.
- 2) X.-Y. Zhang, C. Ning, B. Mao, Y. Wei and M. Shi, A visible-light mediated ring opening reaction of alkylidenecyclopropanes for the generation of homopropargyl radicals. *Chem. Sci.*, 2021, **12**, 9088-9095.
- 3) C. Wang, H. Zhang, F. Xu, Y. Niu, Y. Wu, X. Wang, Y. Peng, J. Sun, L. Liang and P. Xu, Substituted 3-Benzylcoumarins as Allosteric MEK1 Inhibitors: Design, Synthesis and Biological Evaluation as Antiviral Agents. *Molecules*, **2013**, *18*, 6057-6091.
- 4) J. Liu, Y. Wei and M. Shi, Direct Activation of a Remote C(sp<sup>3</sup>)–H Bond Enabled by a Visible-Light Photosensitized Allene Moiety. *Angew. Chem. Int. Ed.*, 2021, **60**, 12053-12059.
- 5) X. Zhao, M. Tian, L. Ji, J. Liu and K. Lu, Metal-Free sp<sup>3</sup> C–SCF<sub>3</sub> Coupling Reactions between Cycloketone Oxime Esters and S-trifluoromethyl 4-Methylbenzenesulfonothioate, *Org. Lett.*, 2020, **22**, 863-866.
- 6) L. Guo, H.-Y. Tu, S. Zhu and L. Chu, Selective Intermolecular Alkylarylation of Alkenes via Photoredox/Nickel Dual Catalysis. *Org. Lett.*, 2019, **21**, 4771-4776.
- 7) T. M. Beck and B. Breit, Regioselective Rhodium-Catalyzed Addition of β-Keto Esters, β-Keto Amides, and 1,3-Diketones to Internal Alkynes. *Eur. J. Org. Chem.*, 2016, **2016**, 5839-5844.
- 8) V. Akhmetov, M. Feofanov, D. I. Sharapa and K. Amsharov, Alumina-mediated π-Activation of Alkynes. *J. Am. Chem. Soc.*, 2021, **143**, 15420-15426.
- 9) B. C. Boren, S. Narayan, L. K. Rasmussen, L. Zhang, H. Zhao, Z. Lin, G. Jia and V. V. Fokin, Ruthenium-Catalyzed Azide-Alkyne Cycloaddition: Scope and Mechanism. *J. Am. Chem. Soc.*, 2008, **130**, 8923-8930.
